# Supplementary material for: Integrating machine learning and bioinformatics analysis to m6A regulator-mediated methylation modification models for predicting glioblastoma patients’ prognosis and immunotherapy response
Source: Aging (Albany NY). 2023 May 23;15(10):4051–70. doi: 10.18632/aging.204495 (PMC10257999; doi:10.18632/aging.204495)
Supplement: Supplementary Table 1 [file aging-15-204495-s001.xlsx]

## Sheet: Sheet1
Supplementary Table 1. Clin.
sample	age	os.time	os.status	type	sex
24	TCGA-06-5858-01	45	184.2	LIVING	Primary	Female
351	TCGA-06-0221-02	31	594.3	DECEASED	Recurrent	Male
274	TCGA-19-0957-02	48	656.4	DECEASED	Recurrent	Female
569	TCGA-19-4065-01	36	210.9	LIVING	Primary	Male
570	TCGA-19-4065-02	36	210.9	LIVING	Recurrent	Male
203	TCGA-14-1402-02	58	960.9	DECEASED	Recurrent	Female
284	TCGA-06-0211-02	47	354.9	DECEASED	Recurrent	Male
323	TCGA-06-0210-02	72	221.7	DECEASED	Recurrent	Female
524	TCGA-06-0190-02	62	312.3	DECEASED	Recurrent	Male
64	TCGA-19-5960-01	56	448.5	DECEASED	Primary	Male
192	TCGA-14-0736-02	49	453.3	DECEASED	Recurrent	Male
56	TCGA-19-1389-02	51	138.9	DECEASED	Recurrent	Male
73	TCGA-06-0125-02	63	1427.1	DECEASED	Recurrent	Female
244	TCGA-06-0152-02	68	369.6	DECEASED	Recurrent	Male
36	TCGA-06-0171-02	65	393.3	DECEASED	Recurrent	Male
1100	CGGA_1001	11	3817	LIVING	Primary	Male
3100	CGGA_1007	57	345	DECEASED	Primary	Female
442	CGGA_1011	46	109	DECEASED	Primary	Female
542	CGGA_1015	62	164	DECEASED	Primary	Male
610	CGGA_1019	60	212	DECEASED	Recurrent	Male
810	CGGA_1023	56	681	DECEASED	Primary	Female
910	CGGA_1024	64	3074	DECEASED	Primary	Male
1010	CGGA_1026	57	1570	DECEASED	Primary	Male
1210	CGGA_1035	60	567	DECEASED	Primary	Female
1310	CGGA_1039	40	727	DECEASED	Primary	Male
1410	CGGA_1045	79	348	DECEASED	Primary	Male
1510	CGGA_1049	58	809	DECEASED	Primary	Male
1710	CGGA_1072	26	1090	DECEASED	Primary	Male
1810	CGGA_1077	47	591	DECEASED	Primary	Male
1910	CGGA_1078	61	315	DECEASED	Recurrent	Female
2210	CGGA_1083	59	450	DECEASED	Primary	Male
2310	CGGA_1091	51	1116	DECEASED	Primary	Female
2410	CGGA_1109	42	1348	DECEASED	Primary	Male
2510	CGGA_1124	47	484	DECEASED	Primary	Male
2610	CGGA_1139	53	1196	DECEASED	Primary	Female
2910	CGGA_1171	40	412	DECEASED	Primary	Male
3010	CGGA_1177	40	449	DECEASED	Recurrent	Male
3110	CGGA_1180	48	1226	LIVING	Primary	Female
3210	CGGA_1188	30	256	DECEASED	Secondary	Female
3310	CGGA_1214	49	604	DECEASED	Primary	Female
3410	CGGA_1216	44	312	DECEASED	Primary	Male
3510	CGGA_1218	53	286	DECEASED	Secondary	Male
3610	CGGA_1224	57	271	DECEASED	Primary	Male
3710	CGGA_1234	32	705	DECEASED	Primary	Male
3810	CGGA_1237	62	296	DECEASED	Primary	Male
3910	CGGA_1240	33	19	DECEASED	Primary	Male
4010	CGGA_1251	42	272	DECEASED	Primary	Female
4110	CGGA_1258	42	114	DECEASED	Primary	Male
4310	CGGA_1270	60	188	DECEASED	Primary	Female
4410	CGGA_1271	17	523	DECEASED	Recurrent	Male
4510	CGGA_1272	32	124	DECEASED	Secondary	Male
4810	CGGA_1283	17	20	DECEASED	Secondary	Male
503	CGGA_1285	58	79	DECEASED	Recurrent	Female
5210	CGGA_1299	54	550	DECEASED	Primary	Male
5310	CGGA_1301	48	239	DECEASED	Secondary	Male
5410	CGGA_1313	42	379	DECEASED	Primary	Male
5510	CGGA_1320	19	59	DECEASED	Primary	Male
5610	CGGA_1332	55	510	LIVING	Primary	Female
5710	CGGA_1338	61	1122	DECEASED	Primary	Female
5910	CGGA_1342	47	186	DECEASED	Primary	Male
606	CGGA_1343	34	94	DECEASED	Recurrent	Male
612	CGGA_1346	57	284	DECEASED	Secondary	Female
622	CGGA_1370	43	325	LIVING	Recurrent	Male
631	CGGA_1393	41	275	DECEASED	Secondary	Male
682	CGGA_272	51	217	DECEASED	Secondary	Male
691	CGGA_274	55	610	LIVING	Primary	Female
721	CGGA_318	40	222	DECEASED	Secondary	Female
751	CGGA_413	54	183	LIVING	Primary	Male
781	CGGA_483	59	277	DECEASED	Primary	Female
811	CGGA_494	58	4435	LIVING	Primary	Female
831	CGGA_499	51	122	DECEASED	Primary	Male
841	CGGA_525	61	138	DECEASED	Primary	Male
901	CGGA_604	46	381	DECEASED	Primary	Male
922	CGGA_624	50	122	DECEASED	Recurrent	Female
971	CGGA_658	55	372	DECEASED	Primary	Male
1002	CGGA_669	56	607	DECEASED	Recurrent	Female
1011	CGGA_676	60	376	DECEASED	Primary	Male
1031	CGGA_679	63	263	DECEASED	Primary	Female
104	CGGA_680	44	2373	DECEASED	Primary	Male
1061	CGGA_700	24	170	LIVING	Primary	Female
1081	CGGA_731	50	503	DECEASED	Primary	Male
1111	CGGA_773	51	443	DECEASED	Secondary	Female
1121	CGGA_782	60	289	DECEASED	Primary	Male
1132	CGGA_789	50	345	DECEASED	Primary	Male
1161	CGGA_802	42	681	DECEASED	Primary	Male
1172	CGGA_804	53	614	LIVING	Primary	Female
1191	CGGA_808	38	1167	LIVING	Primary	Male
1201	CGGA_837	57	432	DECEASED	Primary	Male
1211	CGGA_842	63	204	DECEASED	Primary	Female
1222	CGGA_848	54	239	LIVING	Primary	Female
1232	CGGA_850	52	564	LIVING	Primary	Female
1241	CGGA_859	56	387	DECEASED	Primary	Male
1261	CGGA_876	60	159	DECEASED	Primary	Female
1271	CGGA_878	42	863	DECEASED	Primary	Male
1282	CGGA_902	54	193	DECEASED	Primary	Male
1291	CGGA_D02	44	484	DECEASED	Recurrent	Male
1301	CGGA_D03	44	423	DECEASED	Primary	Male
1321	CGGA_D09	57	233	DECEASED	Primary	Male
1361	CGGA_D26	55	263	DECEASED	Recurrent	Male
1371	CGGA_D32	61	358	DECEASED	Recurrent	Male
1382	CGGA_D35	68	661	DECEASED	Primary	Female
1391	CGGA_D36	58	34	DECEASED	Recurrent	Male
1402	CGGA_D37	55	965	DECEASED	Primary	Male
1422	CGGA_D51	60	135	DECEASED	Recurrent	Female
1432	CGGA_D57	40	766	DECEASED	Primary	Male
1451	CGGA_342	49	500	DECEASED	Primary	Female
1461	CGGA_719	51	101	DECEASED	Secondary	Male
1562	CGGA_1060	42	227	DECEASED	Recurrent	Male
1582	CGGA_1068	29	68	DECEASED	Secondary	Male
1602	CGGA_1105	29	609	DECEASED	Secondary	Male
1622	CGGA_1129	34	168	DECEASED	Secondary	Male
1632	CGGA_1136	38	236	DECEASED	Secondary	Female
1662	CGGA_1170	25	346	DECEASED	Secondary	Male
1671	CGGA_1175	36	441	DECEASED	Secondary	Female
1711	CGGA_1219	57	2120	DECEASED	Primary	Female
1721	CGGA_1227	46	1197	DECEASED	Recurrent	Female
1741	CGGA_1287	29	533	DECEASED	Primary	Male
1761	CGGA_1314	27	172	DECEASED	Primary	Female
1781	CGGA_1324	42	848	DECEASED	Secondary	Male
1821	CGGA_1375	50	92	DECEASED	Secondary	Female
1832	CGGA_1381	36	46	DECEASED	Recurrent	Female
1841	CGGA_1384	39	191	DECEASED	Primary	Female
1862	CGGA_1394	37	139	DECEASED	Recurrent	Male
1881	CGGA_1409	24	2727	LIVING	Primary	Female
1892	CGGA_1412	48	296	DECEASED	Secondary	Female
2062	CGGA_374	37	493	DECEASED	Secondary	Male
2141	CGGA_491	36	1074	DECEASED	Primary	Female
2201	CGGA_545	38	555	DECEASED	Recurrent	Female
2442	CGGA_710	41	660	DECEASED	Primary	Male
247	CGGA_747	29	970	DECEASED	Primary	Male
2511	CGGA_761	45	1840	DECEASED	Primary	Male
2571	CGGA_822	46	2237	DECEASED	Secondary	Male
2691	CGGA_899	48	231	DECEASED	Recurrent	Male
2842	CGGA_D34	45	147	DECEASED	Secondary	Male
2852	CGGA_D38	41	689	DECEASED	Recurrent	Female
2942	CGGA_D59	30	NA	NA	Secondary	Female
2961	CGGA_518	27	212	DECEASED	Secondary	Male
3001	CGGA_J100	55	NA	NA	Recurrent	Male
3022	CGGA_1008	54	315	DECEASED	Primary	Female
3031	CGGA_1053	63	370	DECEASED	Primary	Female
3052	CGGA_1070	37	333	DECEASED	Primary	Male
3072	CGGA_1073	42	270	DECEASED	Primary	Female
3081	CGGA_1074	50	86	DECEASED	Primary	Male
3101	CGGA_1099	8	122	DECEASED	Secondary	Male
3112	CGGA_1114	53	460	DECEASED	Primary	Male
3122	CGGA_1116	43	248	DECEASED	Recurrent	Female
3141	CGGA_1119	52	422	DECEASED	Recurrent	Male
3151	CGGA_1197	43	942	DECEASED	Secondary	Male
3171	CGGA_1275	70	183	DECEASED	Primary	Male
3182	CGGA_1450	37	957	DECEASED	Secondary	Male
3191	CGGA_1460	51	209	DECEASED	Secondary	Male
3201	CGGA_1475	38	182	DECEASED	Secondary	Male
3241	CGGA_759	30	1263	DECEASED	Primary	Male
3252	CGGA_D30	70	215	DECEASED	Primary	Male
653	CGGA_1017	29	768	DECEASED	Primary	Female
1251	CGGA_1036	41	806	DECEASED	Primary	Male
1411	CGGA_1041	58	3593	LIVING	Primary	Male
2611	CGGA_1075	72	398	DECEASED	Primary	Male
2931	CGGA_1086	65	1977	DECEASED	Primary	Female
3421	CGGA_1103	35	585	DECEASED	Primary	Female
3511	CGGA_1106	37	420	DECEASED	Primary	Male
4311	CGGA_1130	23	402	DECEASED	Recurrent	Female
4610	CGGA_1134	56	59	DECEASED	Primary	Female
4710	CGGA_1135	40	1244	DECEASED	Primary	Male
4910	CGGA_1138	54	411	DECEASED	Primary	Male
5110	CGGA_1142	60	1005	DECEASED	Primary	Male
641	CGGA_1164	38	1022	DECEASED	Recurrent	Female
661	CGGA_1172	36	3131	LIVING	Primary	Female
761	CGGA_120	42	288	DECEASED	Recurrent	Male
801	CGGA_1208	38	161	DECEASED	Recurrent	Male
881	CGGA_1236	47	191	DECEASED	Primary	Female
911	CGGA_1248	54	138	DECEASED	Recurrent	Male
921	CGGA_1255	49	118	DECEASED	Recurrent	Male
931	CGGA_1256	52	2557	LIVING	Primary	Female
941	CGGA_1257	59	192	DECEASED	Recurrent	Male
951	CGGA_1260	32	177	DECEASED	Recurrent	Male
961	CGGA_1262	69	166	DECEASED	Recurrent	Female
1001	CGGA_1282	33	1116	DECEASED	Primary	Female
1131	CGGA_1325	20	NA	NA	Recurrent	Male
1141	CGGA_1326	45	322	DECEASED	Primary	Male
1171	CGGA_1337	67	2172	DECEASED	Recurrent	Male
1221	CGGA_1353	65	1022	DECEASED	Primary	Male
1231	CGGA_1354	40	530	DECEASED	Primary	Female
1281	CGGA_1365	55	253	DECEASED	Primary	Male
1311	CGGA_1371	68	2791	LIVING	Primary	Male
1331	CGGA_1378	47	378	DECEASED	Primary	Male
1341	CGGA_1380	46	291	DECEASED	Primary	Male
1351	CGGA_1382	57	284	DECEASED	Primary	Male
1381	CGGA_1387	41	90	DECEASED	Recurrent	Male
1401	CGGA_139	59	694	DECEASED	Primary	Male
1421	CGGA_1391	62	426	LIVING	Primary	Male
1431	CGGA_1392	62	473	DECEASED	Primary	Male
1471	CGGA_1402	30	2742	LIVING	Primary	Male
1481	CGGA_1403	43	679	DECEASED	Primary	Female
1511	CGGA_1410	27	825	DECEASED	Primary	Female
1531	CGGA_1415	30	2719	LIVING	Recurrent	Female
1561	CGGA_1418	73	287	DECEASED	Primary	Female
1571	CGGA_1419	56	249	DECEASED	Recurrent	Male
1581	CGGA_1420	60	364	DECEASED	Primary	Male
1601	CGGA_1422	76	204	DECEASED	Primary	Male
1621	CGGA_1425	22	640	DECEASED	Primary	Female
1631	CGGA_1426	50	133	DECEASED	Primary	Female
1651	CGGA_1429	40	2685	LIVING	Recurrent	Female
1661	CGGA_1430	28	162	DECEASED	Recurrent	Female
1681	CGGA_1433	72	394	DECEASED	Primary	Female
1731	CGGA_1441	70	1882	DECEASED	Primary	Male
1751	CGGA_1444	68	378	DECEASED	Primary	Female
1791	CGGA_1451	45	438	DECEASED	Primary	Female
1801	CGGA_1452	53	468	DECEASED	Primary	Male
1831	CGGA_1457	60	312	DECEASED	Primary	Male
1861	CGGA_1461	60	226	DECEASED	Primary	Female
1871	CGGA_1462	49	174	DECEASED	Primary	Male
1891	CGGA_1467	58	866	DECEASED	Primary	Male
1921	CGGA_1472	34	1025	DECEASED	Primary	Male
1951	CGGA_1476	53	299	DECEASED	Primary	Female
1971	CGGA_1478	72	542	DECEASED	Primary	Female
1981	CGGA_1480	41	405	DECEASED	Recurrent	Male
1991	CGGA_1481	55	131	DECEASED	Primary	Male
2011	CGGA_1486	45	184	DECEASED	Primary	Male
2041	CGGA_1491	29	246	DECEASED	Primary	Male
2051	CGGA_1492	47	268	DECEASED	Recurrent	Female
2061	CGGA_1494	21	269	DECEASED	Primary	Male
2071	CGGA_1496	42	330	DECEASED	Recurrent	Female
2091	CGGA_1498	69	NA	NA	Primary	Male
2101	CGGA_1500	45	108	DECEASED	Primary	Female
2111	CGGA_1501	58	222	DECEASED	Primary	Male
2131	CGGA_1503	47	777	DECEASED	Primary	Male
2151	CGGA_1505	30	172	DECEASED	Recurrent	Male
2161	CGGA_1507	41	715	DECEASED	Recurrent	Female
2241	CGGA_1520	67	297	DECEASED	Recurrent	Female
2251	CGGA_1521	63	205	DECEASED	Primary	Female
2321	CGGA_1529	63	583	DECEASED	Primary	Male
2361	CGGA_1534	58	27	DECEASED	Primary	Female
2371	CGGA_1535	43	232	DECEASED	Recurrent	Male
2391	CGGA_1537	73	97	DECEASED	Primary	Male
2401	CGGA_1538	57	247	DECEASED	Recurrent	Female
2411	CGGA_1539	61	2462	LIVING	Primary	Male
2421	CGGA_1541	50	67	DECEASED	Recurrent	Female
2431	CGGA_1542	26	184	LIVING	Primary	Male
2441	CGGA_1543	57	723	DECEASED	Primary	Male
2461	CGGA_1546	56	223	DECEASED	Primary	Male
2471	CGGA_1548	53	1054	DECEASED	Primary	Male
2481	CGGA_1551	50	347	DECEASED	Primary	Female
2531	CGGA_1558	71	130	DECEASED	Recurrent	Male
2541	CGGA_1559	63	603	DECEASED	Primary	Male
2551	CGGA_1560	35	459	DECEASED	Primary	Female
2581	CGGA_1564	48	190	DECEASED	Primary	Male
2651	CGGA_1571	43	412	LIVING	Primary	Female
2661	CGGA_1572	60	160	DECEASED	Recurrent	Female
2711	CGGA_1586	55	232	DECEASED	Primary	Female
2781	CGGA_1595	34	2363	LIVING	Primary	Female
2791	CGGA_1596	63	205	DECEASED	Primary	Male
2801	CGGA_1597	58	174	DECEASED	Primary	Male
2821	CGGA_1601	66	710	DECEASED	Primary	Male
2831	CGGA_1603	18	356	DECEASED	Recurrent	Male
2841	CGGA_1604	46	740	DECEASED	Recurrent	Male
2851	CGGA_1605	34	321	DECEASED	Recurrent	Male
2901	CGGA_1611	30	1158	DECEASED	Recurrent	Female
2911	CGGA_1612	68	718	DECEASED	Primary	Male
2921	CGGA_1613	53	250	LIVING	Primary	Male
2941	CGGA_1615	48	586	DECEASED	Recurrent	Male
3011	CGGA_1624	27	87	DECEASED	Recurrent	Female
3021	CGGA_1626	66	696	DECEASED	Primary	Male
3051	CGGA_1631	58	221	DECEASED	Recurrent	Female
3061	CGGA_1634	26	366	DECEASED	Primary	Female
3071	CGGA_1635	43	332	DECEASED	Primary	Female
3091	CGGA_1641	57	291	DECEASED	Recurrent	Female
3111	CGGA_1643	50	NA	NA	Primary	Female
3121	CGGA_1644	48	173	DECEASED	Primary	Male
3181	CGGA_1650	36	1283	DECEASED	Primary	Male
3211	CGGA_1654	61	NA	NA	Primary	Male
3231	CGGA_1656	56	149	DECEASED	Recurrent	Male
3251	CGGA_1658	64	1574	DECEASED	Recurrent	Female
3261	CGGA_1659	24	387	DECEASED	Recurrent	Male
3301	CGGA_1663	61	290	DECEASED	Recurrent	Male
3321	CGGA_1666	60	249	DECEASED	Primary	Male
3411	CGGA_1678	51	657	DECEASED	Primary	Male
3441	CGGA_1681	58	346	DECEASED	Primary	Female
3451	CGGA_1682	67	345	DECEASED	Recurrent	Male
3461	CGGA_1684	51	NA	NA	Primary	Male
3491	CGGA_1687	14	2118	LIVING	Primary	Male
3521	CGGA_1690	60	592	DECEASED	Primary	Male
3541	CGGA_1694	55	624	DECEASED	Primary	Male
3571	CGGA_1697	47	89	DECEASED	Recurrent	Female
3581	CGGA_1698	55	388	DECEASED	Primary	Female
3591	CGGA_1699	41	2088	LIVING	Primary	Female
3621	CGGA_1702	29	168	DECEASED	Recurrent	Female
3651	CGGA_1706	60	2068	LIVING	Primary	Male
3661	CGGA_1708	54	1122	DECEASED	Primary	Female
3671	CGGA_1709	47	415	DECEASED	Primary	Male
3681	CGGA_1713	62	332	DECEASED	Primary	Male
3751	CGGA_1722	60	349	DECEASED	Primary	Female
3781	CGGA_1727	48	1980	LIVING	Primary	Male
3791	CGGA_1728	45	917	DECEASED	Primary	Male
3801	CGGA_1729	52	244	DECEASED	Recurrent	Male
3821	CGGA_1735	54	813	DECEASED	Primary	Male
3831	CGGA_1736	57	938	DECEASED	Primary	Female
3871	CGGA_1740	50	363	DECEASED	Primary	Female
3891	CGGA_1744	51	1936	LIVING	Primary	Male
3921	CGGA_1749	44	401	DECEASED	Primary	Female
3931	CGGA_1750	52	250	DECEASED	Primary	Female
3941	CGGA_1758	45	414	DECEASED	Primary	Female
3961	CGGA_1764	33	710	DECEASED	Primary	Male
3971	CGGA_1767	63	86	DECEASED	Primary	Male
3981	CGGA_1769	49	1854	LIVING	Primary	Female
3991	CGGA_1770	43	267	DECEASED	Recurrent	Female
4011	CGGA_1773	46	104	DECEASED	Recurrent	Female
4021	CGGA_1776	23	259	DECEASED	Recurrent	Male
4031	CGGA_1780	57	1826	LIVING	Primary	Female
4041	CGGA_1785	34	329	DECEASED	Recurrent	Male
4071	CGGA_1807	65	247	DECEASED	Primary	Female
4091	CGGA_1811	64	304	DECEASED	Recurrent	Male
4101	CGGA_1812	65	780	DECEASED	Primary	Male
4111	CGGA_1814	46	221	DECEASED	Recurrent	Female
4121	CGGA_1815	45	185	DECEASED	Recurrent	Female
4131	CGGA_1817	72	399	DECEASED	Primary	Female
4141	CGGA_1819	55	1005	DECEASED	Primary	Male
4151	CGGA_1820	52	77	DECEASED	Recurrent	Female
4161	CGGA_1826	70	44	DECEASED	Primary	Female
4181	CGGA_1833	60	494	DECEASED	Primary	Female
4191	CGGA_1840	58	1179	LIVING	Primary	Female
4221	CGGA_1857	46	157	DECEASED	Recurrent	Male
4251	CGGA_1865	45	89	DECEASED	Recurrent	Female
4261	CGGA_1866	68	127	DECEASED	Primary	Male
4271	CGGA_1870	62	1556	LIVING	Primary	Male
4321	CGGA_1886	31	338	DECEASED	Recurrent	Male
4331	CGGA_1899	45	176	DECEASED	Recurrent	Male
4341	CGGA_1901	60	540	DECEASED	Primary	Male
4381	CGGA_1908	42	298	DECEASED	Recurrent	Female
4391	CGGA_1911	15	1451	LIVING	Recurrent	Male
4401	CGGA_1912	48	507	DECEASED	Recurrent	Male
4411	CGGA_1916	33	NA	NA	Primary	Female
4441	CGGA_1946	51	142	DECEASED	Recurrent	Female
4451	CGGA_1953	47	73	DECEASED	Recurrent	Male
4461	CGGA_1955	30	457	DECEASED	Recurrent	Male
447	CGGA_1972	47	1291	LIVING	Recurrent	Male
4481	CGGA_1976	53	73	DECEASED	Recurrent	Female
4491	CGGA_1985	41	380	DECEASED	Recurrent	Male
4521	CGGA_2003	40	780	DECEASED	Recurrent	Male
4541	CGGA_2008	56	44	DECEASED	Recurrent	Male
4561	CGGA_2024	19	328	DECEASED	Recurrent	Female
4571	CGGA_2038	44	NA	DECEASED	Recurrent	Male
4581	CGGA_2039	28	702	LIVING	Recurrent	Male
4601	CGGA_2047	64	598	DECEASED	Recurrent	Female
4611	CGGA_2053	55	1031	LIVING	Recurrent	Male
4621	CGGA_2056	41	1019	LIVING	Recurrent	Female
4631	CGGA_2062	63	41	DECEASED	Recurrent	Female
4641	CGGA_2075	63	266	DECEASED	Recurrent	Male
4651	CGGA_2078	61	280	DECEASED	Recurrent	Female
4681	CGGA_2082	41	571	LIVING	Recurrent	Male
4691	CGGA_2088	30	NA	NA	Recurrent	Female
4701	CGGA_2106	39	892	LIVING	Recurrent	Female
4711	CGGA_2115	31	171	DECEASED	Recurrent	Female
4901	CGGA_487	46	156	DECEASED	Recurrent	Male
4941	CGGA_509	38	623	DECEASED	Primary	Male
4961	CGGA_530	41	506	DECEASED	Recurrent	Female
4981	CGGA_568	14	285	DECEASED	Recurrent	Male
5141	CGGA_777	46	146	DECEASED	Recurrent	Male
5201	CGGA_831	55	546	DECEASED	Primary	Female
5271	CGGA_869	36	537	LIVING	Recurrent	Female
5411	CGGA_D53	30	NA	NA	Recurrent	Male
5441	CGGA_P100	67	268	DECEASED	Primary	Male
5451	CGGA_P102	30	1269	DECEASED	Primary	Male
5481	CGGA_P106	24	71	DECEASED	Recurrent	Male
5511	CGGA_P109	35	407	DECEASED	Recurrent	Male
5551	CGGA_P112	65	834	DECEASED	Primary	Male
5591	CGGA_P116	58	305	DECEASED	Primary	Male
5661	CGGA_P136	41	842	DECEASED	Primary	Female
5691	CGGA_P143	66	261	DECEASED	Primary	Female
5741	CGGA_P15	49	723	DECEASED	Primary	Male
5781	CGGA_P154	50	NA	NA	Primary	Male
5841	CGGA_P16	38	NA	NA	Primary	Male
5851	CGGA_P160	72	219	DECEASED	Primary	Female
5871	CGGA_P164	27	1553	LIVING	Primary	Male
5931	CGGA_P175	45	183	DECEASED	Recurrent	Male
5961	CGGA_P178	52	1442	LIVING	Primary	Female
5991	CGGA_P180	47	260	DECEASED	Primary	Male
601	CGGA_P182	58	1512	LIVING	Recurrent	Female
605	CGGA_P199	66	203	DECEASED	Recurrent	Male
607	CGGA_P205	66	583	DECEASED	Primary	Male
609	CGGA_P22	62	406	DECEASED	Primary	Male
611	CGGA_P25	64	147	DECEASED	Primary	Male
619	CGGA_P28	61	107	DECEASED	Primary	Male
620	CGGA_P280	52	1342	LIVING	Recurrent	Female
621	CGGA_P283	38	1331	LIVING	Recurrent	Male
624	CGGA_P295	46	273	DECEASED	Recurrent	Male
639	CGGA_P335	42	1203	LIVING	Recurrent	Male
646	CGGA_P385	22	1112	LIVING	Recurrent	Male
650	CGGA_P401	31	788	DECEASED	Recurrent	Male
651	CGGA_P411	47	440	DECEASED	Recurrent	Female
652	CGGA_P415	56	195	DECEASED	Recurrent	Female
664	CGGA_P499	69	NA	NA	Recurrent	Female
671	CGGA_P512	23	541	DECEASED	Recurrent	Male
674	CGGA_P585	50	344	DECEASED	Recurrent	Male
676	CGGA_P596	60	777	LIVING	Recurrent	Female
678	CGGA_P609	19	726	LIVING	Primary	Female
679	CGGA_P610	62	345	DECEASED	Recurrent	Male
681	CGGA_P619	66	236	DECEASED	Recurrent	Female
683	CGGA_P625	46	161	DECEASED	Recurrent	Female
685	CGGA_P7	45	110	DECEASED	Recurrent	Male
689	CGGA_P87	32	240	DECEASED	Recurrent	Male
690	CGGA_P89	42	294	DECEASED	Recurrent	Male
693	CGGA_P99	52	679	LIVING	Recurrent	Male
84	TCGA-02-0099-01	46	104.4	DECEASED	Primary	Male
205	TCGA-06-0150-01	45	583.5	DECEASED	Primary	Male
384	TCGA-06-0142-01	81	66	DECEASED	Primary	Male
519	TCGA-06-0178-01	38	2642.1	DECEASED	Primary	Male
534	TCGA-02-0011-01	18	621	DECEASED	Primary	Female
83	TCGA-06-0125-01	63	1427.1	DECEASED	Primary	Female
293	TCGA-06-0141-01	62	308.4	DECEASED	Primary	Male
438	TCGA-06-0132-01	49	759.9	DECEASED	Primary	Male
307	TCGA-06-0174-01	54	96.6	DECEASED	Primary	Male
141	TCGA-02-0064-01	50	591.3	DECEASED	Primary	Male
38	TCGA-06-0171-01	65	393.3	DECEASED	Primary	Male
282	TCGA-06-0211-01	47	354.9	DECEASED	Primary	Male
500	TCGA-06-0122-01	84	184.2	DECEASED	Primary	Female
403	TCGA-02-0014-01	25	2475.6	DECEASED	Primary	Male
60	TCGA-02-0052-01	49	377.4	DECEASED	Primary	Male
422	TCGA-06-0219-01	67	21.6	DECEASED	Primary	Male
593	TCGA-06-0157-01	63	95.7	DECEASED	Primary	Female
381	TCGA-02-0114-01	37	2997	DECEASED	Primary	Female
507	TCGA-06-0145-01	53	69.9	DECEASED	Primary	Female
16	TCGA-06-0124-01	67	611.1	DECEASED	Primary	Male
159	TCGA-02-0038-01	48	321.3	DECEASED	Primary	Female
196	TCGA-06-0201-01	51	11.7	DECEASED	Primary	Female
568	TCGA-02-0116-01	51	1467.6	DECEASED	Primary	Male
467	TCGA-02-0021-01	43	2328	DECEASED	Primary	Female
429	TCGA-06-0154-01	54	417.9	DECEASED	Primary	Male
476	TCGA-02-0010-01	20	1061.4	DECEASED	Primary	Female
95	TCGA-06-0195-01	63	221.7	DECEASED	Primary	Male
383	TCGA-02-0057-01	66	595.2	DECEASED	Primary	Female
518	TCGA-06-0190-01	62	312.3	DECEASED	Primary	Male
206	TCGA-06-0173-01	72	134.1	DECEASED	Primary	Female
49	TCGA-06-0158-01	73	324.3	DECEASED	Primary	Male
426	TCGA-02-0069-01	31	860.4	LIVING	Primary	Female
328	TCGA-02-0115-01	52	469.2	DECEASED	Primary	Male
394	TCGA-06-0208-01	52	252.3	DECEASED	Primary	Female
138	TCGA-06-0126-01	86	207.9	DECEASED	Primary	Male
20	TCGA-02-0006-01	56	549.9	DECEASED	Primary	Female
591	TCGA-02-0089-01	52	508.5	DECEASED	Primary	Male
454	TCGA-06-0188-01	71	1336.5	DECEASED	Primary	Male
148	TCGA-02-0107-01	56	529.2	DECEASED	Primary	Male
252	TCGA-06-0128-01	66	681	DECEASED	Primary	Male
374	TCGA-02-0060-01	66	180.3	DECEASED	Primary	Female
379	TCGA-02-0001-01	44	352.8	DECEASED	Primary	Female
288	TCGA-06-0197-01	65	166.5	DECEASED	Primary	Female
102	TCGA-06-0237-01	75	408.9	DECEASED	Primary	Female
439	TCGA-02-0058-01	28	250.2	DECEASED	Primary	Female
345	TCGA-06-0165-01	52	319.2	DECEASED	Primary	Male
92	TCGA-06-0137-01	63	800.4	DECEASED	Primary	Female
29	TCGA-06-0159-01	74	282.9	DECEASED	Primary	Male
485	TCGA-02-0055-01	62	75	DECEASED	Primary	Female
582	TCGA-06-0206-01	40	229.5	DECEASED	Primary	Male
218	TCGA-06-0184-01	63	2095.2	DECEASED	Primary	Male
342	TCGA-06-0209-01	76	228.6	DECEASED	Primary	Male
367	TCGA-06-0187-01	69	816	DECEASED	Primary	Male
350	TCGA-06-0221-01	31	594.3	DECEASED	Primary	Male
116	TCGA-02-0007-01	40	694.8	DECEASED	Primary	Female
461	TCGA-06-0156-01	57	175.5	DECEASED	Primary	Male
567	TCGA-06-0169-01	68	98.7	DECEASED	Primary	Male
185	TCGA-06-0138-01	43	726.3	DECEASED	Primary	Male
207	TCGA-06-0139-01	40	356.7	DECEASED	Primary	Male
515	TCGA-02-0043-01	54	549	DECEASED	Primary	Female
264	TCGA-02-0028-01	39	2715.3	DECEASED	Primary	Male
155	TCGA-06-0185-01	54	2213.4	LIVING	Primary	Male
96	TCGA-02-0054-01	44	196.2	DECEASED	Primary	Female
144	TCGA-06-0214-01	66	450.3	DECEASED	Primary	Male
181	TCGA-06-0151-01	32	1396.5	DECEASED	Primary	Female
187	TCGA-02-0003-01	50	141.9	DECEASED	Primary	Male
335	TCGA-06-0130-01	54	388.2	DECEASED	Primary	Male
339	TCGA-02-0024-01	35	1591.8	DECEASED	Primary	Male
401	TCGA-06-0166-01	51	175.5	DECEASED	Primary	Male
396	TCGA-06-0189-01	55	462.3	DECEASED	Primary	Male
584	TCGA-06-0168-01	59	589.5	DECEASED	Primary	Female
87	TCGA-02-0086-01	45	264	DECEASED	Primary	Female
571	TCGA-06-0240-01	57	612	DECEASED	Primary	Male
588	TCGA-02-0033-01	54	84.9	DECEASED	Primary	Male
131	TCGA-02-0075-01	63	624.9	DECEASED	Primary	Male
535	TCGA-02-0034-01	60	423.9	DECEASED	Primary	Male
217	TCGA-02-0037-01	74	108.3	DECEASED	Primary	Female
221	TCGA-02-0085-01	63	1538.4	DECEASED	Primary	Female
259	TCGA-02-0083-01	59	681	DECEASED	Primary	Female
269	TCGA-06-0140-01	86	6	DECEASED	Primary	Male
334	TCGA-06-0176-01	34	2727.9	LIVING	Primary	Male
360	TCGA-02-0046-01	61	206.1	DECEASED	Primary	Male
325	TCGA-06-0210-01	72	221.7	DECEASED	Primary	Female
400	TCGA-06-0143-01	58	351.9	DECEASED	Primary	Male
514	TCGA-06-0241-01	65	1459.5	DECEASED	Primary	Female
121	TCGA-06-0160-01	56	353.7	DECEASED	Primary	Female
361	TCGA-02-0071-01	53	164.7	DECEASED	Primary	Male
448	TCGA-02-0047-01	78	441.6	DECEASED	Primary	Male
313	TCGA-06-0129-01	30	1009.2	DECEASED	Primary	Male
436	TCGA-02-0113-01	43	2777.4	LIVING	Primary	Female
492	TCGA-02-0080-01	28	2689.5	DECEASED	Primary	Male
407	TCGA-02-0102-01	42	810	DECEASED	Primary	Male
26	TCGA-06-0147-01	51	533.1	DECEASED	Primary	Female
227	TCGA-02-0074-01	68	305.4	DECEASED	Primary	Female
119	TCGA-06-0148-01	76	302.7	DECEASED	Primary	Male
160	TCGA-06-0213-01	55	15.9	DECEASED	Primary	Female
290	TCGA-02-0027-01	33	364.8	DECEASED	Primary	Female
455	TCGA-06-0133-01	64	428.7	DECEASED	Primary	Male
457	TCGA-02-0009-01	61	317.4	DECEASED	Primary	Female
132	TCGA-06-2567-01	65	131.1	DECEASED	Primary	Male
12	TCGA-12-0703-01	46	611.1	DECEASED	Primary	Male
165	TCGA-14-1821-01	31	533.1	DECEASED	Primary	Male
42	TCGA-08-0373-01	69	132	DECEASED	Primary	Male
406	TCGA-26-1438-01	36	300.6	LIVING	Primary	Male
198	TCGA-14-1402-01	58	960.9	DECEASED	Primary	Female
100	TCGA-16-1045-01	49	870.3	DECEASED	Primary	Female
154	TCGA-19-1388-01	58	388.2	DECEASED	Primary	Male
580	TCGA-19-0963-01	61	427.8	DECEASED	Primary	Male
193	TCGA-14-0736-01	49	453.3	DECEASED	Primary	Male
171	TCGA-19-1387-01	81	178.5	LIVING	Primary	Male
2	TCGA-14-1452-01	60	213	DECEASED	Primary	Male
432	TCGA-14-1823-01	58	535.2	DECEASED	Primary	Female
441	TCGA-06-0749-01	50	80.7	DECEASED	Primary	Male
573	TCGA-06-1086-01	42	204.9	DECEASED	Primary	Male
311	TCGA-12-0618-01	49	389.4	DECEASED	Primary	Male
545	TCGA-08-0525-01	52	479.1	DECEASED	Primary	Male
546	TCGA-12-1598-01	75	469.2	DECEASED	Primary	Female
41	TCGA-12-0692-01	75	109.5	DECEASED	Primary	Female
157	TCGA-02-0422-01	50	434.7	DECEASED	Primary	Male
602	TCGA-06-2564-01	50	178.5	LIVING	Primary	Male
215	TCGA-02-0004-01	59	339.9	DECEASED	Primary	Male
530	TCGA-08-0392-01	60	21.6	DECEASED	Primary	Male
459	TCGA-06-0179-01	64	607.2	DECEASED	Primary	Male
502	TCGA-06-1801-01	56	354.9	DECEASED	Primary	Female
599	TCGA-14-0871-01	74	867.3	DECEASED	Primary	Female
75	TCGA-12-3649-01	76	456.3	DECEASED	Primary	Male
62	TCGA-28-1749-01	73	276	LIVING	Primary	Male
531	TCGA-08-0358-01	50	668.1	DECEASED	Primary	Male
527	TCGA-28-1746-01	77	6	LIVING	Primary	Female
522	TCGA-14-0787-01	69	66.9	DECEASED	Primary	Male
372	TCGA-28-1757-01	71	3.9	LIVING	Primary	Male
173	TCGA-06-0162-01	47	102.6	DECEASED	Primary	Female
224	TCGA-12-1092-01	58	651.3	DECEASED	Primary	Male
408	TCGA-12-1094-01	56	366.6	DECEASED	Primary	Male
464	TCGA-28-1747-01	44	75.9	DECEASED	Primary	Male
386	TCGA-08-0345-01	71	52.2	DECEASED	Primary	Female
295	TCGA-02-0260-01	54	507.6	DECEASED	Primary	Male
169	TCGA-27-2519-01	48	542.1	DECEASED	Primary	Male
93	TCGA-06-0412-01	56	286.8	DECEASED	Primary	Female
168	TCGA-27-1835-01	53	638.7	DECEASED	Primary	Female
473	TCGA-02-0440-01	62	339.9	DECEASED	Primary	Male
114	TCGA-27-2521-01	34	502.5	DECEASED	Primary	Male
340	TCGA-12-1599-01	47	769.8	DECEASED	Primary	Female
523	TCGA-06-1087-01	75	121.2	DECEASED	Primary	Male
156	TCGA-06-0397-01	57	270	DECEASED	Primary	Female
414	TCGA-08-0356-01	59	932.4	DECEASED	Primary	Female
241	TCGA-06-0152-01	68	369.6	DECEASED	Primary	Male
346	TCGA-06-0645-01	55	172.5	DECEASED	Primary	Female
48	TCGA-19-2624-01	51	4.8	DECEASED	Primary	Male
275	TCGA-19-0957-01	48	656.4	DECEASED	Primary	Female
450	TCGA-12-0776-01	52	291.6	DECEASED	Primary	Male
370	TCGA-15-1449-01	65	398.1	DECEASED	Primary	Male
35	TCGA-28-1751-01	61	228.6	LIVING	Primary	Female
287	TCGA-12-3651-01	77	380.4	DECEASED	Primary	Male
272	TCGA-12-3650-01	46	328.2	DECEASED	Primary	Male
161	TCGA-19-0955-01	71	352.8	LIVING	Primary	Male
257	TCGA-06-0409-01	43	2169.3	DECEASED	Primary	Male
586	TCGA-19-1787-01	48	379.5	DECEASED	Primary	Male
201	TCGA-15-1446-01	55	572.7	LIVING	Primary	Male
69	TCGA-14-1453-01	69	34.5	DECEASED	Primary	Male
286	TCGA-19-2620-01	70	145.8	DECEASED	Primary	Male
122	TCGA-06-0649-01	73	63	DECEASED	Primary	Female
600	TCGA-12-1597-01	62	665.1	DECEASED	Primary	Female
510	TCGA-02-0337-01	48	753	DECEASED	Primary	Male
468	TCGA-02-0285-01	50	415.8	DECEASED	Primary	Female
445	TCGA-27-2527-01	81	431.7	DECEASED	Primary	Male
385	TCGA-02-0332-01	46	770.7	DECEASED	Primary	Female
303	TCGA-14-0865-01	67	494.7	DECEASED	Primary	Male
103	TCGA-12-1088-01	53	3825	DECEASED	Primary	Female
520	TCGA-12-3646-01	59	1319.7	DECEASED	Primary	Female
153	TCGA-27-1836-01	33	900.9	DECEASED	Primary	Female
597	TCGA-08-0524-01	17	217.8	DECEASED	Primary	Female
585	TCGA-08-0244-01	62	680.1	DECEASED	Primary	Male
550	TCGA-12-0691-01	63	363.6	DECEASED	Primary	Male
547	TCGA-14-0790-01	64	412.8	DECEASED	Primary	Female
19	TCGA-32-2616-01	48	220.8	DECEASED	Primary	Female
525	TCGA-41-2573-01	59	268.2	LIVING	Primary	Male
393	TCGA-14-3477-01	38	113.4	LIVING	Primary	Female
354	TCGA-12-1095-01	65	474.9	DECEASED	Primary	Female
204	TCGA-08-0517-01	34	1759.2	DECEASED	Primary	Female
182	TCGA-19-2621-01	83	32.4	DECEASED	Primary	Male
88	TCGA-14-0812-01	65	97.5	DECEASED	Primary	Male
356	TCGA-14-1458-01	54	200.1	DECEASED	Primary	Male
548	TCGA-08-0360-01	76	461.1	DECEASED	Primary	Male
465	TCGA-02-0451-01	62	486	DECEASED	Primary	Female
362	TCGA-02-2470-01	57	387.3	DECEASED	Primary	Male
115	TCGA-02-0317-01	40	366.6	DECEASED	Primary	Male
147	TCGA-08-0510-01	75	128.1	DECEASED	Primary	Male
390	TCGA-02-0048-01	80	96.6	DECEASED	Primary	Male
434	TCGA-14-0817-01	69	161.7	DECEASED	Primary	Female
214	TCGA-19-2619-01	55	289.8	LIVING	Primary	Female
299	TCGA-28-1753-01	53	36.6	LIVING	Primary	Male
11	TCGA-08-0349-01	46	293.7	DECEASED	Primary	Male
486	TCGA-06-0402-01	71	7.8	DECEASED	Primary	Male
176	TCGA-32-1982-01	76	139.8	DECEASED	Primary	Female
431	TCGA-12-0615-01	78	460.2	DECEASED	Primary	Female
326	TCGA-06-0875-01	61	1302.9	LIVING	Primary	Female
529	TCGA-12-0656-01	48	2841.3	DECEASED	Primary	Female
409	TCGA-08-0516-01	14	587.4	DECEASED	Primary	Male
347	TCGA-08-0390-01	69	418.8	DECEASED	Primary	Male
128	TCGA-14-1454-01	54	904.8	DECEASED	Primary	Female
488	TCGA-12-0820-01	40	553.8	DECEASED	Primary	Male
255	TCGA-02-0111-01	56	694.8	DECEASED	Primary	Male
212	TCGA-06-0745-01	59	235.5	DECEASED	Primary	Male
440	TCGA-02-0333-01	77	131.1	DECEASED	Primary	Female
517	TCGA-14-1827-01	51	176.4	DECEASED	Primary	Male
308	TCGA-06-2570-01	21	944.1	LIVING	Primary	Female
562	TCGA-14-1825-01	70	228.6	DECEASED	Primary	Male
416	TCGA-12-0616-01	36	441.6	DECEASED	Primary	Female
94	TCGA-02-0432-01	36	1412.4	DECEASED	Primary	Male
413	TCGA-02-0290-01	49	477.9	DECEASED	Primary	Male
175	TCGA-15-1447-01	36	1594.5	LIVING	Primary	Female
53	TCGA-12-0818-01	45	2750.7	DECEASED	Primary	Female
380	TCGA-27-1832-01	59	295.8	DECEASED	Primary	Female
466	TCGA-12-0775-01	75	228.6	DECEASED	Primary	Female
415	TCGA-08-0380-01	74	447.3	DECEASED	Primary	Female
444	TCGA-06-0876-01	72	1384.8	LIVING	Primary	Female
292	TCGA-19-1385-01	69	322.2	DECEASED	Primary	Male
364	TCGA-02-0023-01	38	603.3	DECEASED	Primary	Female
43	TCGA-06-0182-01	76	109.5	DECEASED	Primary	Male
460	TCGA-19-1788-01	39	110.4	DECEASED	Primary	Male
353	TCGA-06-0750-01	43	27.6	DECEASED	Primary	Male
417	TCGA-28-2506-01	63	201.9	LIVING	Primary	Female
273	TCGA-12-0828-01	57	268.2	DECEASED	Primary	Male
249	TCGA-06-0747-01	53	80.7	DECEASED	Primary	Male
229	TCGA-02-0456-01	67	100.5	DECEASED	Primary	Female
469	TCGA-12-0821-01	62	318.3	DECEASED	Primary	Male
496	TCGA-08-0347-01	50	770.7	DECEASED	Primary	Male
225	TCGA-16-1055-01	48	308.4	DECEASED	Primary	Male
158	TCGA-02-0015-01	50	618	DECEASED	Primary	Male
556	TCGA-08-0359-01	59	101.4	DECEASED	Primary	Female
70	TCGA-02-2486-01	64	609	DECEASED	Primary	Male
146	TCGA-12-0819-01	49	743.1	DECEASED	Primary	Female
484	TCGA-06-1802-01	61	459.3	DECEASED	Primary	Male
405	TCGA-16-1063-01	72	418.8	DECEASED	Primary	Male
480	TCGA-27-1830-01	57	151.8	DECEASED	Primary	Male
479	TCGA-08-0512-01	48	1263.6	DECEASED	Primary	Male
478	TCGA-06-0413-01	77	94.5	DECEASED	Primary	Female
112	TCGA-06-0744-01	66	1405.5	DECEASED	Primary	Male
558	TCGA-14-2555-01	44	238.5	LIVING	Primary	Female
107	TCGA-19-0960-01	83	258.3	LIVING	Primary	Female
237	TCGA-06-2559-01	83	147.9	DECEASED	Primary	Male
80	TCGA-08-0350-01	32	876	DECEASED	Primary	Male
574	TCGA-02-0325-01	61	318.3	DECEASED	Primary	Male
559	TCGA-19-2625-01	76	122.1	DECEASED	Primary	Female
544	TCGA-02-0266-01	14	531.3	DECEASED	Primary	Male
108	TCGA-27-1837-01	36	420.9	DECEASED	Primary	Male
294	TCGA-12-0827-01	38	1161.9	DECEASED	Primary	Female
541	TCGA-12-1097-01	61	435.6	DECEASED	Primary	Male
449	TCGA-02-0070-01	70	750.9	LIVING	Primary	Male
14	TCGA-06-2569-01	24	12.9	LIVING	Primary	Female
505	TCGA-28-1760-01	48	141	LIVING	Primary	Male
595	TCGA-06-1800-01	61	803.1	DECEASED	Primary	Male
164	TCGA-12-1093-01	66	479.1	DECEASED	Primary	Female
283	TCGA-12-1091-01	10	995.4	DECEASED	Primary	Female
245	TCGA-28-1752-01	42	254.4	LIVING	Primary	Female
555	TCGA-16-1060-01	70	273.9	DECEASED	Primary	Female
428	TCGA-14-0786-01	50	690.9	DECEASED	Primary	Female
358	TCGA-27-2528-01	62	473.1	DECEASED	Primary	Male
266	TCGA-27-1834-01	56	1215.3	DECEASED	Primary	Male
554	TCGA-06-2565-01	59	498.6	DECEASED	Primary	Male
39	TCGA-12-1090-01	58	227.7	DECEASED	Primary	Male
521	TCGA-02-0068-01	57	792.3	DECEASED	Primary	Male
566	TCGA-32-2638-01	67	754.8	DECEASED	Primary	Male
5	TCGA-27-1838-01	59	345	DECEASED	Primary	Female
481	TCGA-02-0324-01	69	231.6	DECEASED	Primary	Female
67	TCGA-14-1795-01	66	59.1	DECEASED	Primary	Male
301	TCGA-02-0016-01	50	2609.7	DECEASED	Primary	Male
402	TCGA-28-1755-01	52	46.2	DECEASED	Primary	Female
581	TCGA-27-2524-01	56	227.7	DECEASED	Primary	Male
300	TCGA-02-0446-01	61	277.8	DECEASED	Primary	Male
31	TCGA-02-0087-01	27	1731.6	LIVING	Primary	Female
302	TCGA-14-1401-01	54	112.5	DECEASED	Primary	Male
134	TCGA-12-3648-01	61	807.3	DECEASED	Primary	Female
430	TCGA-08-0357-01	49	1126.5	DECEASED	Primary	Male
392	TCGA-12-3653-01	34	435.6	DECEASED	Primary	Female
395	TCGA-14-0867-01	67	61.2	DECEASED	Primary	Male
172	TCGA-06-2561-01	53	529.2	DECEASED	Primary	Female
592	TCGA-08-0348-01	63	364.8	DECEASED	Primary	Male
477	TCGA-02-0106-01	54	349.8	DECEASED	Primary	Male
603	TCGA-12-0822-01	46	704.7	DECEASED	Primary	Male
248	TCGA-14-1456-01	23	1227.9	LIVING	Primary	Male
251	TCGA-12-0662-01	51	1144.2	DECEASED	Primary	Male
557	TCGA-14-1451-01	39	692.7	DECEASED	Primary	Male
397	TCGA-06-0644-01	71	378.3	DECEASED	Primary	Male
52	TCGA-02-0258-01	36	495.6	DECEASED	Primary	Female
564	TCGA-06-0192-01	58	1167.9	DECEASED	Primary	Male
82	TCGA-12-1089-01	64	174.3	DECEASED	Primary	Male
289	TCGA-27-1833-01	67	726.3	DECEASED	Primary	Female
71	TCGA-12-0772-01	46	1614.3	DECEASED	Primary	Male
376	TCGA-08-0514-01	69	332.1	DECEASED	Primary	Female
549	TCGA-06-0879-01	52	1211.1	DECEASED	Primary	Male
470	TCGA-12-1602-01	58	203.1	DECEASED	Primary	Male
355	TCGA-08-0389-01	59	460.2	DECEASED	Primary	Male
13	TCGA-06-1084-01	54	717.6	DECEASED	Primary	Male
297	TCGA-06-2558-01	75	374.4	DECEASED	Primary	Female
260	TCGA-02-0039-01	54	315.3	DECEASED	Primary	Male
110	TCGA-19-1789-01	69	97.5	DECEASED	Primary	Female
239	TCGA-32-2632-01	80	265.2	DECEASED	Primary	Male
594	TCGA-02-0104-01	29	1948.5	DECEASED	Primary	Female
552	TCGA-26-1799-01	68	280.8	DECEASED	Primary	Male
230	TCGA-02-0026-01	27	737.1	DECEASED	Primary	Male
596	TCGA-32-2615-01	62	477.9	DECEASED	Primary	Male
10	TCGA-28-2514-01	45	157.8	LIVING	Primary	Male
27	TCGA-06-0686-01	53	425.7	DECEASED	Primary	Male
446	TCGA-12-0688-01	74	799.2	DECEASED	Primary	Male
277	TCGA-02-0084-01	36	378.3	DECEASED	Primary	Female
85	TCGA-08-0520-01	70	322.2	DECEASED	Primary	Male
579	TCGA-12-0773-01	24	1296	DECEASED	Primary	Male
118	TCGA-02-0338-01	41	317.4	DECEASED	Primary	Male
491	TCGA-02-2483-01	43	459.3	LIVING	Primary	Male
77	TCGA-27-2523-01	63	481.8	DECEASED	Primary	Male
412	TCGA-06-0155-01	61	313.5	DECEASED	Primary	Male
231	TCGA-12-0769-01	52	451.5	DECEASED	Primary	Male
511	TCGA-32-1976-01	65	14.7	DECEASED	Primary	Male
348	TCGA-19-1786-01	64	214.8	LIVING	Primary	Female
8	TCGA-02-0271-01	26	433.5	DECEASED	Primary	Male
17	TCGA-06-0881-01	50	496.8	DECEASED	Primary	Male
149	TCGA-06-0194-01	37	139.8	DECEASED	Primary	Female
191	TCGA-02-0330-01	51	477	DECEASED	Primary	Female
61	TCGA-12-0670-01	60	778.5	DECEASED	Primary	Male
604	TCGA-06-0146-01	33	602.1	DECEASED	Primary	Female
411	TCGA-14-1459-01	63	372.6	DECEASED	Primary	Female
18	TCGA-06-0743-01	69	791.4	DECEASED	Primary	Male
210	TCGA-12-0619-01	60	1046.7	DECEASED	Primary	Male
105	TCGA-28-2513-01	69	218.7	LIVING	Primary	Female
391	TCGA-27-1831-01	66	497.7	DECEASED	Primary	Male
316	TCGA-14-2554-01	52	524.4	DECEASED	Primary	Female
238	TCGA-12-0780-01	51	445.5	DECEASED	Primary	Female
483	TCGA-06-0878-01	74	214.8	LIVING	Primary	Male
197	TCGA-08-0352-01	79	38.4	DECEASED	Primary	Male
129	TCGA-12-1099-01	68	124.2	DECEASED	Primary	Female
509	TCGA-06-0648-01	77	293.7	DECEASED	Primary	Male
387	TCGA-02-0289-01	57	425.7	DECEASED	Primary	Male
40	TCGA-19-1791-01	82	3.9	LIVING	Primary	Female
233	TCGA-14-1037-01	66	578.4	DECEASED	Primary	Female
352	TCGA-14-0866-01	55	789.3	DECEASED	Primary	Male
306	TCGA-08-0518-01	60	579.6	DECEASED	Primary	Female
66	TCGA-14-1396-01	78	33.6	DECEASED	Primary	Female
425	TCGA-06-0177-01	64	125.1	DECEASED	Primary	Male
45	TCGA-06-2557-01	76	32.4	DECEASED	Primary	Male
79	TCGA-02-0269-01	68	322.2	DECEASED	Primary	Male
371	TCGA-08-0344-01	66	3473.1	DECEASED	Primary	Male
389	TCGA-27-2526-01	79	85.8	DECEASED	Primary	Female
101	TCGA-08-0351-01	40	1958.4	DECEASED	Primary	Male
576	TCGA-02-0430-01	67	316.5	DECEASED	Primary	Female
590	TCGA-12-1096-01	55	273	DECEASED	Primary	Male
280	TCGA-14-1794-01	59	29.7	DECEASED	Primary	Male
331	TCGA-06-0646-01	60	172.5	DECEASED	Primary	Male
336	TCGA-19-2629-01	60	726.3	DECEASED	Primary	Male
258	TCGA-28-2509-01	77	142.8	LIVING	Primary	Female
163	TCGA-02-2466-01	61	503.7	DECEASED	Primary	Male
423	TCGA-12-0654-01	48	227.7	DECEASED	Primary	Female
560	TCGA-12-1600-01	86	441.6	DECEASED	Primary	Male
363	TCGA-02-0321-01	74	296.7	DECEASED	Primary	Male
184	TCGA-14-1455-01	61	27.6	DECEASED	Primary	Male
333	TCGA-16-0849-01	54	781.5	LIVING	Primary	Male
553	TCGA-32-1986-01	68	380.4	DECEASED	Primary	Male
583	TCGA-12-0657-01	69	3	DECEASED	Primary	Male
314	TCGA-28-1756-01	78	84.9	LIVING	Primary	Male
54	TCGA-16-1460-01	36	192.3	LIVING	Primary	Female
216	TCGA-08-0353-01	58	252.3	DECEASED	Primary	Male
357	TCGA-14-1034-01	60	477.9	DECEASED	Primary	Female
565	TCGA-14-0789-01	54	337.2	DECEASED	Primary	Male
279	TCGA-27-2518-01	52	742.2	DECEASED	Primary	Male
349	TCGA-02-0059-01	68	286.8	DECEASED	Primary	Female
497	TCGA-06-0414-01	63	1052.7	DECEASED	Primary	Male
305	TCGA-14-0783-01	36	186.3	DECEASED	Primary	Female
533	TCGA-02-2485-01	53	463.2	LIVING	Primary	Male
37	TCGA-14-1829-01	57	214.8	LIVING	Primary	Male
321	TCGA-08-0355-01	30	736.2	DECEASED	Primary	Female
28	TCGA-14-0813-01	78	40.5	DECEASED	Primary	Male
194	TCGA-06-0127-01	67	119.4	DECEASED	Primary	Male
368	TCGA-15-0742-01	65	412.8	DECEASED	Primary	Male
539	TCGA-12-0707-01	55	851.4	DECEASED	Primary	Male
33	TCGA-06-0216-01	61	724.5	DECEASED	Primary	Female
3	TCGA-08-0509-01	63	376.5	DECEASED	Primary	Male
167	TCGA-08-0529-01	56	552	DECEASED	Primary	Female
235	TCGA-12-0826-01	38	832.8	DECEASED	Primary	Female
72	TCGA-02-0326-01	82	219.9	DECEASED	Primary	Female
263	TCGA-02-0051-01	43	452.4	DECEASED	Primary	Male
516	TCGA-19-0962-01	77	19.8	DECEASED	Primary	Female
343	TCGA-19-0964-01	70	101.4	LIVING	Primary	Male
127	TCGA-16-1056-01	55	419.7	DECEASED	Primary	Male
145	TCGA-19-2623-01	65	225.6	LIVING	Primary	Male
337	TCGA-41-2571-01	89	25.5	DECEASED	Primary	Male
254	TCGA-02-0281-01	78	119.4	DECEASED	Primary	Female
268	TCGA-19-1386-01	51	272.1	DECEASED	Primary	Male
86	TCGA-08-0245-01	31	1134.3	DECEASED	Primary	Female
22	TCGA-08-0521-01	17	144	DECEASED	Primary	Male
223	TCGA-08-0531-01	64	226.8	DECEASED	Primary	Male
369	TCGA-06-0164-01	47	1706.1	DECEASED	Primary	Male
81	TCGA-06-0238-01	46	399	DECEASED	Primary	Male
472	TCGA-08-0346-01	69	252.3	DECEASED	Primary	Male
124	TCGA-28-1750-01	40	250.2	LIVING	Primary	Female
246	TCGA-06-0175-01	69	121.2	DECEASED	Primary	Male
126	TCGA-26-1443-01	60	213.9	LIVING	Primary	Female
276	TCGA-06-0410-01	76	141	DECEASED	Primary	Female
388	TCGA-02-0025-01	47	1281.3	DECEASED	Primary	Male
332	TCGA-26-1440-01	48	291.6	LIVING	Primary	Male
166	TCGA-32-1970-01	59	461.1	DECEASED	Primary	Male
232	TCGA-08-0375-01	51	366.6	DECEASED	Primary	Female
243	TCGA-16-0848-01	57	527.4	DECEASED	Primary	Male
55	TCGA-19-1389-01	51	138.9	DECEASED	Primary	Male
487	TCGA-06-2566-01	23	179.4	DECEASED	Primary	Female
170	TCGA-12-0620-01	57	313.5	DECEASED	Primary	Male
44	TCGA-28-2502-01	65	19.8	LIVING	Primary	Male
338	TCGA-06-0394-01	51	324.3	DECEASED	Primary	Male
23	TCGA-08-0246-01	57	125.1	DECEASED	Primary	Female
543	TCGA-19-1392-01	72	109.5	DECEASED	Primary	Female
137	TCGA-06-0149-01	74	258.3	DECEASED	Primary	Female
312	TCGA-08-0354-01	52	538.2	DECEASED	Primary	Female
25	TCGA-02-0339-01	67	371.7	DECEASED	Primary	Male
366	TCGA-06-2563-01	72	918.6	LIVING	Primary	Female
504	TCGA-02-0079-01	57	816.9	DECEASED	Primary	Male
344	TCGA-32-2634-01	82	683.1	LIVING	Primary	Male
421	TCGA-16-1062-01	57	636.6	DECEASED	Primary	Female
188	TCGA-16-0846-01	85	117.3	DECEASED	Primary	Male
471	TCGA-12-1098-01	75	119.4	DECEASED	Primary	Female
15	TCGA-12-0829-01	75	617.1	DECEASED	Primary	Male
418	TCGA-06-2562-01	81	376.5	DECEASED	Primary	Male
563	TCGA-12-3644-01	47	1791.6	DECEASED	Primary	Female
63	TCGA-16-1047-01	66	137.1	DECEASED	Primary	Female
57	TCGA-19-1390-01	63	760.8	DECEASED	Primary	Female
34	TCGA-06-1805-01	28	1016.1	LIVING	Primary	Female
226	TCGA-08-0386-01	74	540	DECEASED	Primary	Male
111	TCGA-41-2575-01	75	285.9	DECEASED	Primary	Male
317	TCGA-12-0778-01	53	447.3	DECEASED	Primary	Male
228	TCGA-12-3652-01	60	1046.7	DECEASED	Primary	Male
330	TCGA-41-3392-01	88	29.7	DECEASED	Primary	Male
125	TCGA-06-0882-01	30	622.8	DECEASED	Primary	Male
452	TCGA-16-0850-01	52	490.8	DECEASED	Primary	Female
130	TCGA-08-0385-01	71	80.7	DECEASED	Primary	Male
598	TCGA-26-5136-01	78	568.8	DECEASED	Primary	Female
9	TCGA-28-5207-01	71	338.1	DECEASED	Primary	Male
242	TCGA-06-5418-01	75	81.9	DECEASED	Primary	Female
572	TCGA-76-4932-01	50	1437	DECEASED	Primary	Female
458	TCGA-12-5295-01	60	447.3	DECEASED	Primary	Female
341	TCGA-76-4934-01	66	75.9	DECEASED	Primary	Female
189	TCGA-28-5216-01	52	408.9	LIVING	Primary	Male
142	TCGA-76-4929-01	76	109.5	DECEASED	Primary	Female
236	TCGA-12-5299-01	56	96.6	DECEASED	Primary	Female
99	TCGA-26-5133-01	59	445.5	LIVING	Primary	Male
435	TCGA-26-5139-01	65	47.4	LIVING	Primary	Female
433	TCGA-76-4935-01	52	1104.9	DECEASED	Primary	Female
456	TCGA-06-5414-01	61	269.1	LIVING	Primary	Male
427	TCGA-06-5416-01	23	201	LIVING	Primary	Female
222	TCGA-28-5204-01	72	447.3	DECEASED	Primary	Male
136	TCGA-28-5220-01	67	382.5	DECEASED	Primary	Male
281	TCGA-76-4926-01	68	135.9	DECEASED	Primary	Male
74	TCGA-26-5132-01	74	282	LIVING	Primary	Male
219	TCGA-76-4925-01	76	144	DECEASED	Primary	Male
151	TCGA-28-5208-01	52	536.1	DECEASED	Primary	Male
256	TCGA-32-5222-01	66	576.6	DECEASED	Primary	Male
404	TCGA-06-5415-01	60	256.2	LIVING	Primary	Male
211	TCGA-28-5215-01	62	330.3	DECEASED	Primary	Female
320	TCGA-28-5213-01	72	937.2	LIVING	Primary	Male
501	TCGA-28-5209-01	66	435.6	LIVING	Primary	Female
475	TCGA-76-4931-01	70	275.1	DECEASED	Primary	Female
451	TCGA-28-5214-01	53	702.6	DECEASED	Primary	Male
499	TCGA-26-5135-01	72	266.1	DECEASED	Primary	Female
135	TCGA-28-5219-01	47	680.1	LIVING	Primary	Female
261	TCGA-76-4927-01	58	527.4	DECEASED	Primary	Male
378	TCGA-06-5417-01	45	152.7	LIVING	Primary	Female
78	TCGA-28-5218-01	63	154.8	DECEASED	Primary	Male
7	TCGA-76-4928-01	85	92.7	DECEASED	Primary	Female
253	TCGA-12-5301-01	59	61.2	DECEASED	Primary	Male
482	TCGA-26-5134-01	74	164.7	LIVING	Primary	Male
373	TCGA-32-4208-01	25	633.6	LIVING	Primary	Male
30	TCGA-32-1978-01	57	474.9	DECEASED	Primary	Male
526	TCGA-32-2494-01	58	622.8	DECEASED	Primary	Female
538	TCGA-41-2572-01	67	400.2	DECEASED	Primary	Male
315	TCGA-26-1439-01	63	415.8	DECEASED	Primary	Male
291	TCGA-32-1991-01	60	507.6	DECEASED	Primary	Male
1	TCGA-32-4213-01	47	595.2	LIVING	Primary	Female
177	TCGA-32-4210-01	73	111.3	DECEASED	Primary	Male
91	TCGA-32-1977-01	63	3	LIVING	Primary	Female
551	TCGA-32-2495-01	59	450.3	DECEASED	Primary	Female
90	TCGA-19-1790-01	56	151.8	DECEASED	Primary	Male
420	TCGA-41-3393-01	81	132.9	DECEASED	Primary	Female
578	TCGA-32-4719-01	73	325.2	DECEASED	Primary	Male
382	TCGA-32-1973-01	21	631.8	DECEASED	Primary	Male
199	TCGA-19-4068-01	68	135	LIVING	Primary	Female
267	TCGA-41-4097-01	63	6	DECEASED	Primary	Female
21	TCGA-32-2491-01	63	366.6	DECEASED	Primary	Male
265	TCGA-19-2631-01	74	210	DECEASED	Primary	Female
528	TCGA-32-1987-01	49	445.5	DECEASED	Primary	Female
202	TCGA-32-4211-01	56	377.4	DECEASED	Primary	Male
540	TCGA-06-0939-01	79	802.2	DECEASED	Primary	Female
183	TCGA-41-3915-01	48	354.9	DECEASED	Primary	Male
59	TCGA-14-4157-01	40	102.6	LIVING	Primary	Male
89	TCGA-06-5410-01	72	106.5	DECEASED	Primary	Female
271	TCGA-81-5911-01	33	531.3	LIVING	Primary	Male
318	TCGA-19-5953-01	58	141.9	DECEASED	Primary	Male
51	TCGA-76-6286-01	60	628.8	DECEASED	Primary	Male
443	TCGA-06-6389-01	49	233.7	LIVING	Primary	Female
324	TCGA-41-6646-01	73	373.5	DECEASED	Primary	Female
398	TCGA-87-5896-01	50	788.4	LIVING	Primary	Female
195	TCGA-06-5408-01	54	351.9	DECEASED	Primary	Female
123	TCGA-76-6664-01	49	1085.1	LIVING	Primary	Female
6	TCGA-15-1444-01	21	1514.7	DECEASED	Primary	Male
310	TCGA-76-6656-01	66	144.9	DECEASED	Primary	Male
285	TCGA-19-5955-01	83	53.1	DECEASED	Primary	Male
270	TCGA-06-5859-01	63	137.1	LIVING	Primary	Male
278	TCGA-76-6282-01	63	511.5	DECEASED	Primary	Male
298	TCGA-06-6695-01	64	249.3	LIVING	Primary	Male
76	TCGA-06-1804-01	81	408	DECEASED	Primary	Female
208	TCGA-28-6450-01	60	162.6	DECEASED	Primary	Male
213	TCGA-06-6694-01	76	220.8	DECEASED	Primary	Female
508	TCGA-41-5651-01	59	453.3	DECEASED	Primary	Female
419	TCGA-06-6698-01	53	142.8	LIVING	Primary	Female
424	TCGA-74-6584-01	55	224.7	LIVING	Primary	Female
463	TCGA-74-6573-01	67	103.5	DECEASED	Primary	Male
209	TCGA-06-6700-01	76	142.8	LIVING	Primary	Male
296	TCGA-32-1980-01	72	35.4	DECEASED	Primary	Male
494	TCGA-76-6660-01	73	112.5	DECEASED	Primary	Male
186	TCGA-76-6191-01	57	500.7	DECEASED	Primary	Male
498	TCGA-06-5856-01	58	112.5	DECEASED	Primary	Male
512	TCGA-26-1442-01	43	939.3	LIVING	Primary	Male
109	TCGA-26-6173-01	57	237.6	LIVING	Primary	Male
140	TCGA-19-5958-01	56	421.8	DECEASED	Primary	Male
495	TCGA-19-5951-01	76	240.6	DECEASED	Primary	Female
143	TCGA-76-6285-01	64	250.2	DECEASED	Primary	Female
47	TCGA-32-1979-01	69	584.4	DECEASED	Primary	Female
365	TCGA-14-0740-01	70	358.8	DECEASED	Primary	Male
150	TCGA-19-5947-01	47	199.2	DECEASED	Primary	Female
4	TCGA-14-1395-01	52	41.4	DECEASED	Primary	Male
375	TCGA-19-5954-01	72	362.7	DECEASED	Primary	Female
575	TCGA-28-5211-01	42	352.8	LIVING	Primary	Male
536	TCGA-76-6662-01	58	1032.9	DECEASED	Primary	Male
410	TCGA-19-5952-01	62	566.7	DECEASED	Primary	Male
327	TCGA-76-6280-01	57	341.1	DECEASED	Primary	Male
32	TCGA-06-5411-01	51	250.2	DECEASED	Primary	Male
474	TCGA-76-6661-01	54	716.4	DECEASED	Primary	Male
139	TCGA-06-0650-01	39	706.5	DECEASED	Primary	Female
174	TCGA-81-5910-01	64	48.3	DECEASED	Primary	Male
577	TCGA-74-6575-01	73	626.7	LIVING	Primary	Female
162	TCGA-26-6174-01	65	69.9	LIVING	Primary	Female
234	TCGA-06-6391-01	44	44.4	DECEASED	Primary	Female
329	TCGA-06-6697-01	65	385.2	LIVING	Primary	Male
113	TCGA-06-6701-01	60	148.8	LIVING	Primary	Male
117	TCGA-06-6693-01	64	3614.1	DECEASED	Primary	Female
50	TCGA-06-5412-01	78	135.9	DECEASED	Primary	Female
46	TCGA-19-5959-01	77	503.7	DECEASED	Primary	Female
304	TCGA-74-6581-01	77	246.3	LIVING	Primary	Male
98	TCGA-74-6577-01	51	130.2	LIVING	Primary	Male
120	TCGA-14-0862-01	60	86.7	DECEASED	Primary	Male
489	TCGA-14-1043-01	61	23.7	DECEASED	Primary	Male
68	TCGA-76-6193-01	78	80.7	DECEASED	Primary	Male
319	TCGA-06-6388-01	64	156.6	DECEASED	Primary	Female
106	TCGA-14-0781-01	49	28.5	DECEASED	Primary	Male
399	TCGA-06-6390-01	58	161.7	DECEASED	Primary	Male
179	TCGA-76-6283-01	71	162.6	DECEASED	Primary	Female
322	TCGA-76-6657-01	74	150.9	DECEASED	Primary	Male
587	TCGA-06-5413-01	67	264	LIVING	Primary	Male
490	TCGA-14-1450-01	57	1762.2	LIVING	Primary	Female
152	TCGA-74-6578-01	58	429.6	LIVING	Primary	Male
180	TCGA-19-5956-01	53	674.1	DECEASED	Primary	Female
513	TCGA-06-6699-01	58	46.2	LIVING	Primary	Female
1101	CGGA_11	57	155	DECEASED	Primary	Female
2100	CGGA_124	53	414	DECEASED	Primary	Male
3102	CGGA_126	50	1177	DECEASED	Primary	Female
4100	CGGA_168	17	3086	LIVING	Primary	Male
5100	CGGA_172	57	462	DECEASED	Primary	Female
613	CGGA_195	48	486	DECEASED	Primary	Male
710	CGGA_203	40	188	DECEASED	Primary	Male
812	CGGA_221	37	287	DECEASED	Primary	Male
912	CGGA_225	32	1741	DECEASED	Primary	Male
1012	CGGA_240	54	386	DECEASED	Primary	Male
1110	CGGA_287	39	571	DECEASED	Primary	Female
1212	CGGA_292	37	812	DECEASED	Primary	Male
1412	CGGA_370	51	338	DECEASED	Primary	Male
1512	CGGA_373	45	281	DECEASED	Primary	Female
1610	CGGA_375	57	657	DECEASED	Primary	Male
1712	CGGA_377	17	398	DECEASED	Primary	Male
1811	CGGA_380	52	165	DECEASED	Primary	Male
1911	CGGA_404	65	NA	NA	Primary	Male
2010	CGGA_419	56	198	DECEASED	Primary	Male
2110	CGGA_437	54	1025	DECEASED	Primary	Female
2211	CGGA_439	33	3813	DECEASED	Primary	Female
2311	CGGA_442	62	1555	DECEASED	Primary	Male
2412	CGGA_444	70	225	DECEASED	Primary	Female
2512	CGGA_451	61	795	DECEASED	Primary	Male
2612	CGGA_454	37	412	DECEASED	Primary	Male
3113	CGGA_512	33	4371	LIVING	Primary	Male
3212	CGGA_527	33	439	DECEASED	Primary	Male
3311	CGGA_547	29	1337	DECEASED	Primary	Male
3412	CGGA_549	34	413	DECEASED	Primary	Female
3512	CGGA_557	38	257	DECEASED	Primary	Female
3611	CGGA_570	60	3602	LIVING	Primary	Female
3711	CGGA_573	35	946	DECEASED	Primary	Male
3811	CGGA_575	55	551	DECEASED	Primary	Male
3911	CGGA_588	58	773	DECEASED	Primary	Male
4012	CGGA_593	37	242	DECEASED	Primary	Male
4112	CGGA_594	27	4318	LIVING	Primary	Female
4210	CGGA_597	31	733	DECEASED	Primary	Female
4312	CGGA_606	62	325	DECEASED	Primary	Male
4412	CGGA_609	44	512	LIVING	Primary	Female
4511	CGGA_612	47	2023	DECEASED	Primary	Male
4612	CGGA_640	55	4117	LIVING	Primary	Male
4712	CGGA_646	67	363	DECEASED	Primary	Female
4811	CGGA_649	58	147	DECEASED	Primary	Female
4911	CGGA_654	45	626	DECEASED	Primary	Male
5010	CGGA_664	43	4224	LIVING	Primary	Female
5311	CGGA_683	56	688	LIVING	Primary	Female
5412	CGGA_684	53	714	DECEASED	Primary	Male
5512	CGGA_686	50	348	DECEASED	Primary	Male
5611	CGGA_693	46	1195	DECEASED	Primary	Female
5711	CGGA_699	34	570	DECEASED	Primary	Female
5911	CGGA_709	32	406	DECEASED	Primary	Female
608	CGGA_713	35	27	DECEASED	Primary	Male
614	CGGA_714	30	400	DECEASED	Primary	Female
623	CGGA_729	63	687	DECEASED	Primary	Female
642	CGGA_741	58	396	DECEASED	Primary	Female
672	CGGA_764	50	67	DECEASED	Primary	Male
684	CGGA_775	63	255	DECEASED	Primary	Male
692	CGGA_778	31	175	DECEASED	Primary	Female
752	CGGA_907	62	177	DECEASED	Primary	Male
1722	CGGA_156	51	179	DECEASED	Primary	Male
1732	CGGA_178	38	972	DECEASED	Primary	Male
1742	CGGA_205	65	292	DECEASED	Primary	Male
1752	CGGA_210	68	300	DECEASED	Primary	Female
1762	CGGA_218	12	313	DECEASED	Primary	Male
1771	CGGA_255	42	591	DECEASED	Primary	Female
1782	CGGA_264	54	383	DECEASED	Primary	Male
1792	CGGA_308	55	823	DECEASED	Primary	Female
1802	CGGA_311	40	230	DECEASED	Primary	Male
1812	CGGA_324	52	336	DECEASED	Primary	Male
1822	CGGA_335	59	385	DECEASED	Primary	Male
1833	CGGA_345	43	1547	LIVING	Primary	Female
1842	CGGA_346	45	104	DECEASED	Primary	Male
1851	CGGA_366	54	255	DECEASED	Primary	Male
1863	CGGA_371	42	811	DECEASED	Primary	Male
1872	CGGA_401	24	168	DECEASED	Primary	Female
1893	CGGA_436	48	955	DECEASED	Primary	Male
1901	CGGA_464	39	403	DECEASED	Primary	Female
1912	CGGA_504	22	563	DECEASED	Primary	Female
1931	CGGA_628	35	480	DECEASED	Primary	Male
1961	CGGA_734	56	466	DECEASED	Primary	Female
2902	CGGA_D60	36	196	DECEASED	Secondary	Male
2922	CGGA_104	27	440	LIVING	Secondary	Male
2951	CGGA_462	38	361	DECEASED	Secondary	Male
2981	CGGA_798	41	136	DECEASED	Secondary	Female
GSM2198606	GSM2198606	49	518.7	DECEASED	glioblastoma multiforme tissue sample01	F
GSM2198607	GSM2198607	35	1281.3	LIVING	glioblastoma multiforme tissue sample02	F
GSM2198608	GSM2198608	46	375.9	DECEASED	glioblastoma multiforme tissue sample03	M
GSM2198609	GSM2198609	64	249.6	DECEASED	glioblastoma multiforme tissue sample04	M
GSM2198610	GSM2198610	35	407.4	DECEASED	glioblastoma multiforme tissue sample05	F
GSM2198611	GSM2198611	54	766.5	DECEASED	glioblastoma multiforme tissue sample06	M
GSM2198612	GSM2198612	32	1387.8	DECEASED	glioblastoma multiforme tissue sample07	M
GSM2198613	GSM2198613	61	948.9	LIVING	glioblastoma multiforme tissue sample08	M
GSM2198614	GSM2198614	42	134.1	DECEASED	glioblastoma multiforme tissue sample09	F
GSM2198615	GSM2198615	42	499.2	DECEASED	glioblastoma multiforme tissue sample10	F
GSM2198616	GSM2198616	56	546.3	DECEASED	glioblastoma multiforme tissue sample11	M
GSM2198617	GSM2198617	28	1286.1	LIVING	glioblastoma multiforme tissue sample12	F
GSM2198618	GSM2198618	55	377.7	DECEASED	glioblastoma multiforme tissue sample13	M
GSM2198619	GSM2198619	45	1047.6	LIVING	glioblastoma multiforme tissue sample14	F
GSM2198620	GSM2198620	59	490.2	DECEASED	glioblastoma multiforme tissue sample15	M
GSM2198621	GSM2198621	39	397.5	DECEASED	glioblastoma multiforme tissue sample16	F
GSM2198622	GSM2198622	56	195.3	DECEASED	glioblastoma multiforme tissue sample17	M
GSM2198623	GSM2198623	62	320.4	DECEASED	glioblastoma multiforme tissue sample18	M
GSM2198624	GSM2198624	44	1010.1	DECEASED	glioblastoma multiforme tissue sample19	F
GSM2198625	GSM2198625	38	351	DECEASED	glioblastoma multiforme tissue sample20	M
GSM2198626	GSM2198626	37	814.8	DECEASED	glioblastoma multiforme tissue sample21	M
GSM2198627	GSM2198627	24	659.7	LIVING	glioblastoma multiforme tissue sample22	F
GSM2198628	GSM2198628	37	239.7	DECEASED	glioblastoma multiforme tissue sample23	M
GSM2198629	GSM2198629	58	390.6	DECEASED	glioblastoma multiforme tissue sample24	F
GSM2198630	GSM2198630	38	1074	DECEASED	glioblastoma multiforme tissue sample25	F
GSM2198631	GSM2198631	42	413.4	DECEASED	glioblastoma multiforme tissue sample26	M
GSM2198632	GSM2198632	43	779.1	LIVING	glioblastoma multiforme tissue sample27	?
GSM2198633	GSM2198633	35	576	DECEASED	glioblastoma multiforme tissue sample28	F
GSM2198634	GSM2198634	59	525.6	DECEASED	glioblastoma multiforme tissue sample29	M
GSM2198635	GSM2198635	60	522.6	DECEASED	glioblastoma multiforme tissue sample30	F
GSM2198636	GSM2198636	56	473.4	LIVING	glioblastoma multiforme tissue sample31	F
GSM2198637	GSM2198637	45	277.2	DECEASED	glioblastoma multiforme tissue sample32	F
GSM2198638	GSM2198638	57	455.7	DECEASED	glioblastoma multiforme tissue sample33	F
GSM2198639	GSM2198639	18	1273.2	LIVING	glioblastoma multiforme tissue sample34	M
GSM2198640	GSM2198640	43	276.3	LIVING	glioblastoma multiforme tissue sample35	F
GSM2198641	GSM2198641	40	555.3	DECEASED	glioblastoma multiforme tissue sample36	F
GSM2198642	GSM2198642	33	557.4	DECEASED	glioblastoma multiforme tissue sample37	F
GSM2198643	GSM2198643	57	357.9	DECEASED	glioblastoma multiforme tissue sample38	F
GSM2198644	GSM2198644	27	541.5	DECEASED	glioblastoma multiforme tissue sample39	F
GSM2198645	GSM2198645	47	585	DECEASED	glioblastoma multiforme tissue sample40	M
GSM2198646	GSM2198646	54	684.6	LIVING	glioblastoma multiforme tissue sample41	F
GSM2198647	GSM2198647	40	185.4	DECEASED	glioblastoma multiforme tissue sample42	M
GSM2198648	GSM2198648	52	331.5	DECEASED	glioblastoma multiforme tissue sample43	M
GSM2198649	GSM2198649	43	582.9	DECEASED	glioblastoma multiforme tissue sample44	F
GSM2198650	GSM2198650	68	295.8	DECEASED	glioblastoma multiforme tissue sample45	F
GSM2198651	GSM2198651	28	643.2	LIVING	glioblastoma multiforme tissue sample46	M
GSM2198652	GSM2198652	38	952.8	DECEASED	glioblastoma multiforme tissue sample47	M
GSM2198653	GSM2198653	52	333.3	DECEASED	glioblastoma multiforme tissue sample48	M
GSM2198654	GSM2198654	55	380.7	DECEASED	glioblastoma multiforme tissue sample49	M
GSM2198655	GSM2198655	37	283.2	DECEASED	glioblastoma multiforme tissue sample50	M
GSM1912920	GSM1912920	Glioblastoma Multiforme (GBM)	1024	DECEASED	GBM patient	1
GSM1912921	GSM1912921	Glioblastoma Multiforme (GBM)	878	DECEASED	GBM patient	1
GSM1912922	GSM1912922	Glioblastoma Multiforme (GBM)	356	DECEASED	GBM patient	1
GSM1912923	GSM1912923	Glioblastoma Multiforme (GBM)	657	DECEASED	GBM patient	1
GSM1912924	GSM1912924	Glioblastoma Multiforme (GBM)	188	DECEASED	GBM patient	1
GSM1912925	GSM1912925	Glioblastoma Multiforme (GBM)	588	DECEASED	GBM patient	1
GSM1912926	GSM1912926	Glioblastoma Multiforme (GBM)	1234	LIVING	GBM patient	0
GSM1912927	GSM1912927	Glioblastoma Multiforme (GBM)	385	DECEASED	GBM patient	1
GSM1912928	GSM1912928	Glioblastoma Multiforme (GBM)	710	LIVING	GBM patient	1
GSM1912929	GSM1912929	Glioblastoma Multiforme (GBM)	175	DECEASED	GBM patient	1
GSM1912930	GSM1912930	Glioblastoma Multiforme (GBM)	386	DECEASED	GBM patient	1
GSM1912931	GSM1912931	Glioblastoma Multiforme (GBM)	419	DECEASED	GBM patient	1
GSM1912932	GSM1912932	Glioblastoma Multiforme (GBM)	414	DECEASED	GBM patient	1
GSM1912933	GSM1912933	Glioblastoma Multiforme (GBM)	559	LIVING	GBM patient	0
GSM1912934	GSM1912934	Glioblastoma Multiforme (GBM)	1299	LIVING	GBM patient	1
GSM1912935	GSM1912935	Glioblastoma Multiforme (GBM)	1407	DECEASED	GBM patient	1
GSM1912936	GSM1912936	Glioblastoma Multiforme (GBM)	694	LIVING	GBM patient	1
GSM1912937	GSM1912937	Glioblastoma Multiforme (GBM)	162	DECEASED	GBM patient	1
GSM1912938	GSM1912938	Glioblastoma Multiforme (GBM)	640	DECEASED	GBM patient	1
GSM1912939	GSM1912939	Glioblastoma Multiforme (GBM)	399	DECEASED	GBM patient	1
GSM1912940	GSM1912940	Glioblastoma Multiforme (GBM)	1097	LIVING	GBM patient	0
GSM1912941	GSM1912941	Glioblastoma Multiforme (GBM)	253	DECEASED	GBM patient	1
GSM1912942	GSM1912942	Glioblastoma Multiforme (GBM)	413	DECEASED	GBM patient	1
GSM1912943	GSM1912943	Glioblastoma Multiforme (GBM)	810	DECEASED	GBM patient	1
GSM1912944	GSM1912944	Glioblastoma Multiforme (GBM)	325	DECEASED	GBM patient	1
GSM1912945	GSM1912945	Glioblastoma Multiforme (GBM)	554	DECEASED	GBM patient	1
GSM1912946	GSM1912946	Glioblastoma Multiforme (GBM)	312	DECEASED	GBM patient	1
GSM1912947	GSM1912947	Glioblastoma Multiforme (GBM)	563	DECEASED	GBM patient	1
GSM1912948	GSM1912948	Glioblastoma Multiforme (GBM)	961	LIVING	GBM patient	1
GSM1912949	GSM1912949	Glioblastoma Multiforme (GBM)	27	DECEASED	GBM patient	1
GSM1912950	GSM1912950	Glioblastoma Multiforme (GBM)	198	DECEASED	GBM patient	1
GSM1912951	GSM1912951	Glioblastoma Multiforme (GBM)	565	DECEASED	GBM patient	1
GSM1912952	GSM1912952	Glioblastoma Multiforme (GBM)	1165	LIVING	GBM patient	0
GSM1912953	GSM1912953	Glioblastoma Multiforme (GBM)	285	DECEASED	GBM patient	1
GSM1912954	GSM1912954	Glioblastoma Multiforme (GBM)	742	DECEASED	GBM patient	1
GSM1912955	GSM1912955	Glioblastoma Multiforme (GBM)	396	DECEASED	GBM patient	1
GSM1912956	GSM1912956	Glioblastoma Multiforme (GBM)	504	DECEASED	GBM patient	1
GSM1912957	GSM1912957	Glioblastoma Multiforme (GBM)	554	DECEASED	GBM patient	1
GSM1912958	GSM1912958	Glioblastoma Multiforme (GBM)	526	DECEASED	GBM patient	1
GSM1912959	GSM1912959	Glioblastoma Multiforme (GBM)	714	DECEASED	GBM patient	1
GSM1912960	GSM1912960	Glioblastoma Multiforme (GBM)	823	LIVING	GBM patient	0
GSM1912961	GSM1912961	Glioblastoma Multiforme (GBM)	790	LIVING	GBM patient	0
GSM1912962	GSM1912962	Glioblastoma Multiforme (GBM)	533	DECEASED	GBM patient	1
GSM1912963	GSM1912963	Glioblastoma Multiforme (GBM)	363	DECEASED	GBM patient	1
GSM1912964	GSM1912964	Glioblastoma Multiforme (GBM)	412	DECEASED	GBM patient	1
GSM1912965	GSM1912965	Glioblastoma Multiforme (GBM)	364	DECEASED	GBM patient	1
GSM1912966	GSM1912966	Glioblastoma Multiforme (GBM)	1304	LIVING	GBM patient	0
GSM1912967	GSM1912967	Glioblastoma Multiforme (GBM)	455	DECEASED	GBM patient	1
GSM1912968	GSM1912968	Glioblastoma Multiforme (GBM)	145	DECEASED	GBM patient	1
GSM1912969	GSM1912969	Glioblastoma Multiforme (GBM)	584	DECEASED	GBM patient	1
GSM1912970	GSM1912970	Glioblastoma Multiforme (GBM)	567	DECEASED	GBM patient	1
GSM1912971	GSM1912971	Glioblastoma Multiforme (GBM)	414	DECEASED	GBM patient	1
GSM1912972	GSM1912972	Glioblastoma Multiforme (GBM)	429	DECEASED	GBM patient	1
GSM1912973	GSM1912973	Glioblastoma Multiforme (GBM)	653	LIVING	GBM patient	0
GSM1912974	GSM1912974	Glioblastoma Multiforme (GBM)	145	LIVING	GBM patient	0
GSM1912975	GSM1912975	Glioblastoma Multiforme (GBM)	313	DECEASED	GBM patient	1
GSM1912976	GSM1912976	Glioblastoma Multiforme (GBM)	962	LIVING	GBM patient	1
GSM1912977	GSM1912977	Glioblastoma Multiforme (GBM)	826	DECEASED	GBM patient	1
GSM1912978	GSM1912978	Glioblastoma Multiforme (GBM)	257	DECEASED	GBM patient	1
GSM1912979	GSM1912979	Glioblastoma Multiforme (GBM)	593	DECEASED	GBM patient	1
GSM1061661	GSM1061661	42	1300	DECEASED	Human brain tumor tissue from Glioma patient	Male
GSM1061662	GSM1061662	69	352	DECEASED	Human brain tumor tissue from Glioma patient	Male
GSM1061663	GSM1061663	47	988	DECEASED	Human brain tumor tissue from Glioma patient	Male
GSM1061664	GSM1061664	72	305	DECEASED	Human brain tumor tissue from Glioma patient	Male
GSM1061665	GSM1061665	20	417	DECEASED	Human brain tumor tissue from Glioma patient	Female
GSM1061666	GSM1061666	73	617	DECEASED	Human brain tumor tissue from Glioma patient	Male
GSM1061667	GSM1061667	33	3020	LIVING	Human brain tumor tissue from Glioma patient	Male
GSM1061668	GSM1061668	56	506	DECEASED	Human brain tumor tissue from Glioma patient	Male
GSM1061669	GSM1061669	67	396	DECEASED	Human brain tumor tissue from Glioma patient	Male
GSM1061670	GSM1061670	59	263	DECEASED	Human brain tumor tissue from Glioma patient	Male
GSM1061671	GSM1061671	45	698	DECEASED	Human brain tumor tissue from Glioma patient	Male
GSM1061672	GSM1061672	68	286	DECEASED	Human brain tumor tissue from Glioma patient	Male
GSM1061673	GSM1061673	42	1189	DECEASED	Human brain tumor tissue from Glioma patient	Female
GSM1061674	GSM1061674	52	641	DECEASED	Human brain tumor tissue from Glioma patient	Female
GSM1061675	GSM1061675	55	630	DECEASED	Human brain tumor tissue from Glioma patient	Male
GSM1061676	GSM1061676	63	405	DECEASED	Human brain tumor tissue from Glioma patient	Male
GSM1061677	GSM1061677	65	1082	DECEASED	Human brain tumor tissue from Glioma patient	Male
GSM1061678	GSM1061678	27	2034	DECEASED	Human brain tumor tissue from Glioma patient	Female
GSM1061679	GSM1061679	18	111	DECEASED	Human brain tumor tissue from Glioma patient	Female
GSM1061680	GSM1061680	45	261	DECEASED	Human brain tumor tissue from Glioma patient	Male
GSM1061681	GSM1061681	62	347	DECEASED	Human brain tumor tissue from Glioma patient	Male
GSM1061682	GSM1061682	54	268	DECEASED	Human brain tumor tissue from Glioma patient	Male
GSM1061683	GSM1061683	78	350	DECEASED	Human brain tumor tissue from Glioma patient	Female
GSM1061684	GSM1061684	31	525	DECEASED	Human brain tumor tissue from Glioma patient	Male
GSM1061685	GSM1061685	32	1922	LIVING	Human brain tumor tissue from Glioma patient	Female
GSM1061686	GSM1061686	71	1411	DECEASED	Human brain tumor tissue from Glioma patient	Male
GSM1061687	GSM1061687	71	436	DECEASED	Human brain tumor tissue from Glioma patient	Male
GSM1061688	GSM1061688	64	154	DECEASED	Human brain tumor tissue from Glioma patient	Female
GSM1061689	GSM1061689	60	427	DECEASED	Human brain tumor tissue from Glioma patient	Male
GSM1061690	GSM1061690	32	2134	LIVING	Human brain tumor tissue from Glioma patient	Male
GSM1061691	GSM1061691	80	432	DECEASED	Human brain tumor tissue from Glioma patient	Male
GSM1061692	GSM1061692	62	653	DECEASED	Human brain tumor tissue from Glioma patient	Male
GSM1061693	GSM1061693	28	1737	DECEASED	Human brain tumor tissue from Glioma patient	Male
GSM1061694	GSM1061694	28	358	DECEASED	Human brain tumor tissue from Glioma patient	Male
GSM1061695	GSM1061695	67	565	DECEASED	Human brain tumor tissue from Glioma patient	Female
GSM1061696	GSM1061696	58	20	DECEASED	Human brain tumor tissue from Glioma patient	Female
GSM1061697	GSM1061697	24	1519	LIVING	Human brain tumor tissue from Glioma patient	Female
GSM1061698	GSM1061698	26	1427	LIVING	Human brain tumor tissue from Glioma patient	Male
GSM1061699	GSM1061699	52	33	DECEASED	Human brain tumor tissue from Glioma patient	Female
GSM1061700	GSM1061700	52	900	DECEASED	Human brain tumor tissue from Glioma patient	Female
GSM1061701	GSM1061701	49	1356	LIVING	Human brain tumor tissue from Glioma patient	Female
GSM1061702	GSM1061702	67	323	DECEASED	Human brain tumor tissue from Glioma patient	Female
GSM1061703	GSM1061703	69	811	DECEASED	Human brain tumor tissue from Glioma patient	Male
GSM1061704	GSM1061704	31	827	DECEASED	Human brain tumor tissue from Glioma patient	Male
GSM1061705	GSM1061705	74	474	DECEASED	Human brain tumor tissue from Glioma patient	Male
GSM1061706	GSM1061706	45	1768	LIVING	Human brain tumor tissue from Glioma patient	Male
GSM1061707	GSM1061707	57	1710	LIVING	Human brain tumor tissue from Glioma patient	Male
GSM1061708	GSM1061708	54	587	DECEASED	Human brain tumor tissue from Glioma patient	Male
GSM1061709	GSM1061709	77	308	DECEASED	Human brain tumor tissue from Glioma patient	Male
GSM1061710	GSM1061710	63	144	DECEASED	Human brain tumor tissue from Glioma patient	Female
