# Supplementary material for: Integrating machine learning and bioinformatics analysis to m6A regulator-mediated methylation modification models for predicting glioblastoma patients’ prognosis and immunotherapy response
Source: Aging (Albany NY). 2023 May 23;15(10):4051–70. doi: 10.18632/aging.204495 (PMC10257999; doi:10.18632/aging.204495)
Supplement: Supplementary Table 2 [file aging-15-204495-s002.xlsx]

## Sheet: exp
Supplementary Table 2. TCGA exp.
METTL3	METTL14	RBM15	RBM15B	WTAP	KIAA1429	CBLL1	ZC3H13	ALKBH5	FTO	YTHDC1	YTHDC2	YTHDF1	YTHDF2	YTHDF3	IGF2BP1	HNRNPA2B1	HNRNPC	FMR1	LRPPRC	ELAVL1
TCGA-06-0878-01	2.53264	2.17402	1.79777	2.9636	5.70026	2.69326	3.44828	3.07216	5.02966	3.34245	3.60362	2.24205	4.74336	4.75325	3.87246	0.114224	7.17723	5.79804	2.95549	3.65666	3.93322
TCGA-26-5135-01	2.97829	1.79546	1.60818	3.71013	4.10652	2.30734	2.82074	2.88725	5.13524	2.76021	3.19465	1.66183	4.61973	4.06573	3.14055	0.0419484	6.53588	5.74954	2.53486	3.30895	3.88499
TCGA-06-5859-01	2.64289	1.87161	1.58686	2.65427	4.0814	2.6291	3.54288	2.44757	4.99495	2.77143	3.51819	2.28794	4.78489	4.66066	3.75002	0.00284757	6.81689	5.94052	2.96075	3.8749	3.77981
TCGA-06-2563-01	3.74878	1.9963	1.28384	3.43669	4.39833	2.48105	3.41055	2.94277	4.79715	3.23229	3.37322	2.28393	4.90494	4.36946	3.84978	0.0103003	7.08315	6.2551	2.69961	4.18654	4.1362
TCGA-41-2571-01	3.35069	1.50384	1.51349	4.08165	4.26715	2.00437	3.16835	1.76986	5.55321	2.27109	2.87049	1.35723	5.40773	4.70171	3.37896	0.0485812	6.14239	5.79802	2.32869	3.47093	3.72475
TCGA-28-5207-01	2.60967	2.19745	1.45784	3.87558	4.72309	2.47548	3.47777	3.19338	5.02887	3.70962	3.76723	2.05233	4.60326	4.59388	3.62275	0.0107874	6.8103	5.89408	3.22882	3.86219	3.7993
TCGA-14-0871-01	3.51051	2.33448	1.98945	4.38309	4.32149	3.39962	3.01821	3.75644	4.77064	2.85596	3.79294	1.72428	5.15366	4.84614	3.71493	4.55075	6.99977	6.62632	2.59693	4.82933	4.2825
TCGA-32-2632-01	2.92906	1.69475	1.57394	3.47735	4.34077	2.3084	2.98818	2.65107	4.9284	2.97438	3.19566	1.64141	4.74411	4.40154	3.58454	0.031597	6.68469	5.98476	3.04948	3.46185	3.98639
TCGA-28-2514-01	2.42705	1.72889	1.62782	3.30356	4.53127	2.09085	3.02102	3.14222	4.86133	3.62194	3.46099	2.20602	4.6272	4.36605	3.64056	0.00932176	6.71765	5.72601	2.9595	3.82627	3.94056
TCGA-06-0141-01	2.86696	1.86423	1.21715	2.86141	4.83709	2.2396	2.59404	2.20957	4.72362	2.66067	2.94426	2.30592	4.58383	4.26571	3.54665	0.051413	6.42736	5.36967	2.50901	3.62759	3.31916
TCGA-06-2569-01	3.22674	1.47262	1.81246	3.40375	4.72368	3.40429	2.59867	3.21962	4.96509	2.23847	3.35044	1.58002	4.9373	4.74248	4.59977	2.1343	6.17935	6.22748	3.06105	4.93217	3.99308
TCGA-02-2485-01	3.67	1.79518	1.90992	3.47365	4.43291	2.65017	3.22797	2.92992	4.79417	3.13719	3.5506	2.16542	4.44627	4.57464	3.39024	0.0100465	7.34828	6.49008	3.24422	3.09962	4.46877
TCGA-06-0138-01	2.80588	1.52127	1.11458	2.81114	5.31438	2.16105	2.78684	1.87018	4.70279	2.97265	2.77338	1.66629	5.12537	4.0072	3.43194	0.252937	5.79695	5.67823	2.56715	3.52085	3.36922
TCGA-06-2564-01	3.57727	2.1645	1.68667	3.53503	5.0896	2.65686	3.70181	3.11589	4.99604	3.29471	3.55349	2.08186	5.108	4.28565	3.96661	0.0147117	7.27143	6.04864	2.89803	4.20661	3.81867
TCGA-16-0846-01	2.59547	2.13253	1.68206	3.16464	4.50871	2.16107	2.62976	2.66349	4.45096	3.09496	3.61685	1.67257	5.14321	4.35023	2.89488	0.010875	6.55524	5.65813	2.99789	3.52632	4.04888
TCGA-76-4931-01	3.80562	2.07166	1.66029	4.0083	3.63565	2.67848	3.36359	3.21802	5.13467	3.35355	3.63163	2.10638	5.01225	4.5865	3.63863	0.0220283	7.2206	6.21542	2.65866	3.77742	4.03721
TCGA-14-0817-01	2.82003	1.55352	1.30318	2.84718	5.01096	2.16418	2.68354	1.42098	4.63129	2.64097	2.77768	1.5148	4.28442	4.56828	3.58789	0.023554	5.76003	6.47839	2.55341	3.56845	3.60265
TCGA-19-2620-01	3.08834	2.007	1.36328	3.14288	4.13912	2.09905	2.57393	2.92915	4.72303	3.5916	3.44729	1.79238	5.28983	4.00381	3.32557	0.0523961	6.3452	5.88311	2.95453	3.27265	3.50109
TCGA-26-5132-01	3.09135	2.05831	2.09827	3.67189	5.18739	2.66637	3.56981	2.33019	5.66392	3.27087	3.56134	1.74837	4.99041	4.49384	3.50853	0.0132583	7.14276	6.30439	3.18784	4.01519	4.24453
TCGA-06-2558-01	3.31346	2.08627	1.67036	3.26259	4.63891	2.63748	3.47908	2.34891	4.87903	3.36636	3.51836	1.94118	4.69175	4.57125	4.035	0.0107717	6.79631	6.30391	3.06616	4.12388	3.88111
TCGA-06-5414-01	2.8704	1.96001	1.49344	3.17704	5.2788	2.54001	3.14944	2.77839	4.54598	3.14115	3.45091	1.77947	5.97717	4.32624	3.7747	0.0162844	6.78569	6.15914	2.62295	3.80636	3.70176
TCGA-26-5133-01	2.39725	2.08808	2.05341	3.65906	4.3326	2.86078	3.26672	2.32315	4.632	3.27074	3.54076	1.41353	5.25659	4.93664	3.77826	1.73812	6.30395	5.98229	3.00267	4.24253	4.34509
TCGA-32-4213-01	2.16446	1.70184	1.56553	3.25307	5.22465	2.2463	2.34359	1.78795	4.82837	2.97536	2.73917	1.34993	4.7849	4.24354	3.69651	0.0162874	5.90785	6.29366	2.41865	3.3328	3.48617
TCGA-06-0210-01	3.0881	2.00511	1.47114	3.41916	5.1681	2.66901	3.04864	2.93059	5.34964	3.03264	3.32877	1.86495	5.05267	4.52348	3.87874	0.0559007	6.22534	6.11684	2.69512	3.88905	3.62726
TCGA-41-2572-01	3.23758	1.66915	1.39108	3.12237	4.16041	2.11572	2.70721	2.51845	4.81473	2.86263	2.8746	1.57855	5.15047	4.2763	3.64421	0.0268512	6.51749	6.20665	2.69432	3.558	3.9963
TCGA-06-5417-01	3.04463	2.66926	2.00972	3.34332	4.82974	3.15466	3.59163	2.67348	4.72085	3.42664	4.11218	2.21354	4.97626	4.68608	4.31565	0.0259513	7.05634	6.6625	3.31245	4.46314	3.65524
TCGA-19-2624-01	4.17366	2.14768	1.73559	3.6597	4.2969	2.4428	3.03213	3.29685	4.89429	3.09722	3.69575	2.53753	4.68612	4.51386	3.29352	0.008521	7.72323	6.15996	3.18938	3.47619	4.36999
TCGA-14-1823-01	2.6184	1.91549	1.24922	2.19338	5.57145	2.28903	2.98949	1.93875	4.7389	2.39377	2.85851	2.15885	5.05272	4.45502	3.61849	0.0336979	5.42611	6.23037	2.75475	4.00183	3.21096
TCGA-02-0055-01	2.5524	1.73841	1.5323	3.16034	5.11792	2.82367	2.4951	2.12765	4.75292	2.43101	2.84623	1.63007	4.45174	4.34516	4.2149	0.836263	5.98752	5.80504	2.29208	3.4723	3.46778
TCGA-32-1982-01	3.35714	1.80826	1.40996	2.96104	4.81237	2.15115	2.75344	2.20523	4.55512	2.9423	3.10632	1.90844	4.35656	4.19446	3.61092	0.0305763	6.28398	5.98671	2.36408	3.484	3.53246
TCGA-06-0681-11	2.35087	1.63835	1.35875	3.03916	3.43978	2.02388	2.59016	3.2187	5.22403	3.63897	3.40774	2.04466	4.24624	4.05046	3.29772	0.00299499	5.99675	4.95113	2.96273	4.09935	3.49992
TCGA-06-2570-01	3.86455	2.12324	1.68841	3.80678	4.32765	2.55813	2.81504	2.87865	4.72715	3.0866	3.89057	2.06261	4.68485	4.54956	3.65958	0.0271468	6.74248	6.06621	3.16046	3.62983	3.95185
TCGA-06-0745-01	2.52368	1.64658	1.39314	2.82983	4.81239	2.21052	2.91761	2.20738	5.16579	3.10322	2.99215	1.37956	5.093	4.28324	3.19667	0.0140186	6.73026	5.88964	2.4705	3.45975	3.95015
TCGA-32-5222-01	2.86308	1.78325	1.34943	2.69092	4.92157	2.22663	2.86426	2.49682	4.55456	3.00254	3.30621	1.60889	4.43747	4.59796	3.70486	0.0263861	6.86534	6.75838	2.34132	3.53225	3.70748
TCGA-28-5204-01	3.13181	1.96898	1.62025	3.98529	3.69742	2.94633	3.66488	3.25997	4.7963	2.50778	3.59331	1.89719	4.58478	4.62337	3.93054	0.0898161	7.15978	6.3043	2.91415	4.09198	4.00695
TCGA-06-5410-01	2.51912	1.70064	1.22566	3.06396	5.01386	2.25053	2.41052	2.69468	5.00748	2.29855	2.89863	1.56873	4.3599	4.23697	3.48998	0.00839005	6.14763	6.025	2.08343	3.35835	3.34971
TCGA-14-1829-01	2.32019	1.47322	1.08419	1.75459	5.83676	2.17816	2.67862	1.66041	3.86853	2.26343	2.44612	1.57212	3.97715	4.31156	4.21045	0.0155486	4.82706	6.3277	2.1216	3.46264	2.6065
TCGA-02-0047-01	2.53071	1.83073	1.19063	3.18972	4.51251	2.3913	2.62533	3.04102	4.837	3.28046	3.26858	1.83302	4.71187	4.06566	3.51362	0.0194673	6.19824	5.47129	2.89375	3.94921	3.61408
TCGA-15-0742-01	3.60889	2.04461	1.48559	4.08878	3.80118	2.36704	3.10426	1.96009	5.23132	3.09165	3.49876	1.89067	5.40791	4.51714	3.06919	0.00714135	7.45409	6.00285	2.63469	3.61791	4.10388
TCGA-19-2619-01	3.10288	1.73505	1.44866	3.59845	4.09666	2.24774	2.74323	2.84875	5.17242	3.38342	3.46496	1.81562	5.25669	3.98462	3.48121	0.0616661	6.71256	6.03641	3.36198	3.97848	3.92183
TCGA-06-0168-01	2.45381	1.83211	1.41277	3.52782	5.61957	2.16922	2.88686	2.19367	4.79021	2.51793	3.06492	1.39205	4.43284	3.8207	3.44172	0.147517	6.27835	5.69136	2.68172	3.3039	3.72451
TCGA-19-1390-01	3.36217	2.05703	1.94021	4.16813	3.9122	3.09826	3.54652	4.0782	5.43718	3.71783	3.69197	2.43805	4.54086	3.82682	3.83306	0.0369002	7.17941	5.67953	3.15733	3.41042	4.89505
TCGA-41-4097-01	2.6306	2.0851	1.37813	3.28801	3.62178	2.499	2.56208	2.36506	5.27817	3.20751	3.21212	2.20403	4.34677	4.13078	3.79601	0.0286822	6.08937	5.35029	2.91411	3.60962	3.47469
TCGA-27-2526-01	2.68099	1.68206	1.00188	2.42789	4.4685	2.03046	2.77582	2.09542	4.72558	2.60534	2.77089	0.839373	5.18302	4.18548	3.69416	0.00344503	6.04686	6.3612	2.46977	3.76602	3.6228
TCGA-27-2523-01	3.327	1.99923	1.54903	3.9072	4.29167	2.59168	3.33588	2.95021	4.87296	3.27454	3.57822	1.88201	5.16729	4.69332	3.74582	0.0116308	7.13632	6.41949	2.7995	3.79244	4.00058
TCGA-06-5412-01	2.66995	1.63809	1.1964	3.08796	4.81174	2.20837	2.67366	2.1341	4.76856	2.74833	2.97047	1.60472	4.7166	4.34681	3.53394	0.012081	6.391	5.88881	2.3755	3.55363	3.50378
TCGA-19-4065-01	3.26254	1.79711	1.77059	3.23427	4.84692	2.60785	3.06616	2.2788	4.89628	2.84461	3.03212	1.97543	4.6485	4.59404	3.86646	0.06099	6.46472	6.43603	2.77175	3.80043	3.62237
TCGA-06-0644-01	2.35108	1.62149	1.11835	3.57896	4.02283	2.67189	3.25328	2.54917	5.27827	3.05838	2.79804	1.62999	4.57674	4.48742	3.63207	0.462887	6.46046	5.75696	2.11328	3.81308	3.87649
TCGA-12-0821-01	2.48694	2.32136	1.78443	3.91471	5.75891	2.77109	3.49	2.92287	5.01106	3.31837	3.69774	1.74352	5.22632	5.10463	3.93992	0.408037	7.11651	6.19696	3.83181	3.92137	4.23859
TCGA-28-1753-01	3.21426	1.92409	1.63764	4.05115	3.76885	2.44889	3.19697	3.11635	4.92239	3.22463	3.61174	2.12651	4.67558	4.53391	3.6097	0.149583	7.245	6.04495	2.80328	3.38862	4.29265
TCGA-12-0619-01	3.28713	1.81932	1.95015	3.77146	5.68912	2.50151	3.19185	2.99183	4.96025	2.75988	3.24222	1.84431	4.9583	4.78369	3.50794	0.106828	6.87868	5.82852	3.19286	3.44486	3.8841
TCGA-14-0789-01	2.13328	2.01003	1.70727	3.38823	5.7134	2.55881	2.92562	3.10367	5.5692	3.13481	3.66259	1.62335	4.73966	4.25624	3.69629	0.0397268	6.15961	6.00461	2.32827	3.5227	3.59704
TCGA-32-2634-01	2.40944	2.5555	2.28687	4.11381	4.61483	2.86242	3.17348	2.55794	4.91471	3.58265	3.77398	2.23946	5.30021	4.5084	4.01229	0.798121	6.87146	6.12128	3.30643	4.20521	4.26117
TCGA-06-0158-01	3.22565	2.14435	1.44987	3.34953	4.88233	2.37627	2.84332	2.37263	4.83072	3.2396	3.58439	1.97077	5.49367	4.06889	3.64433	0.0173232	6.6527	5.70039	3.1764	3.56698	4.01353
TCGA-12-0618-01	3.59943	2.09424	1.6547	3.47118	4.49875	2.70963	3.39163	3.13225	5.44725	2.72604	3.913	1.79631	4.8503	4.44603	3.71109	0.00543215	6.96309	6.33988	3.15107	4.09537	4.03397
TCGA-26-5139-01	3.03638	2.18405	1.48327	3.55386	5.38375	2.48067	3.21079	3.15017	4.98691	2.9615	3.58274	1.91181	5.27331	4.4508	3.70202	0.0276959	6.95536	6.34858	2.78515	3.44442	3.986
TCGA-06-0747-01	3.79776	2.17221	1.39868	3.39947	4.28094	2.27822	2.93785	2.86784	4.51298	3.26509	3.689	2.0533	5.60271	4.2657	3.45223	0.00294941	6.97332	5.9687	2.57651	3.29351	3.8687
TCGA-32-2616-01	2.79357	1.86578	1.77156	3.83922	4.65845	2.5485	3.56072	2.06191	6.10542	2.95434	3.28828	1.53409	4.54313	4.52543	3.62358	0.0100676	6.78377	5.9264	3.01566	4.23515	4.07543
TCGA-06-0129-01	4.15309	2.55559	2.08241	4.16161	4.43469	2.89163	3.35699	3.52228	4.50636	3.37587	4.0743	2.77489	4.69747	4.62293	3.96651	0.216316	7.05853	6.01081	3.60846	3.77197	3.98321
TCGA-06-0125-01	3.73373	2.05813	1.54228	3.80953	4.70304	2.5629	3.36347	3.08601	5.02797	3.47161	3.51833	2.38511	5.3757	4.55187	3.86196	0.0144509	7.23415	5.87935	2.77716	3.88203	4.38869
TCGA-06-0157-01	3.40668	1.81225	1.36906	3.20485	4.14458	2.35048	3.00672	2.81527	4.6234	3.19817	3.32537	1.80666	5.23718	4.41625	3.64851	0.00928734	6.69561	5.83181	2.88497	3.68663	3.889
TCGA-06-AABW-11	2.782	2.06057	1.38569	2.99629	3.48169	2.24399	2.87358	3.78288	5.59814	3.55532	3.81893	1.89469	4.49121	3.80659	3.33984	0	6.63003	5.33897	2.83998	3.89285	3.47815
TCGA-28-5220-01	2.25508	2.18272	1.49478	2.48652	4.17356	2.42212	2.66883	2.74864	4.678	3.49955	3.2948	1.81218	4.5667	4.4945	3.50132	0.0451718	6.63412	6.25249	2.90082	4.10441	3.75201
TCGA-12-5295-01	2.06679	1.65144	1.23985	2.11328	4.79161	2.33778	3.06093	1.76409	4.63429	2.37457	2.63121	1.16446	4.49812	4.5951	3.58458	0.0119882	6.15942	6.39254	2.15847	3.486	3.73998
TCGA-06-0645-01	2.91405	1.767	1.3526	3.3112	5.76151	2.14925	3.10251	2.45439	4.67818	2.71989	3.12889	1.72489	5.38402	4.24321	3.47143	0.013149	6.49649	5.98386	2.30863	3.27242	3.65822
TCGA-76-4929-01	2.73435	2.30964	1.73051	3.97946	3.4779	2.80143	3.28917	2.28959	5.75245	3.9928	3.49616	1.82696	5.24604	4.72852	3.39377	0.0314115	6.49034	5.73989	2.85024	4.09489	3.54481
TCGA-32-2615-01	2.82428	2.0079	1.65378	3.50711	4.71534	2.43882	2.81601	2.73952	4.998	3.15784	3.38788	1.95746	4.74862	4.2598	3.53351	0.0376311	6.57957	5.60731	2.58973	3.20453	3.68462
TCGA-32-1980-01	2.38053	1.65199	1.15448	2.99065	3.81508	1.94505	2.48749	2.56487	4.87584	3.06517	2.92902	1.5091	4.33242	4.24209	3.16816	0.0250586	5.88252	5.56128	2.41972	3.52564	3.32911
TCGA-26-1442-01	3.41223	1.86229	1.30952	2.93249	3.80387	2.28542	2.83265	3.21667	4.0101	3.31303	3.45094	2.00339	4.65731	3.84553	3.12421	0.00572944	6.5619	5.88429	2.97673	3.72388	3.50802
TCGA-06-0187-01	2.98357	1.94641	1.57469	3.54851	4.61212	2.43185	3.24574	2.67655	5.23095	3.07278	3.33707	1.33432	5.05062	4.82619	3.57573	0.28947	5.92026	5.93127	2.64022	3.72399	3.78866
TCGA-14-2554-01	2.66012	2.02914	1.1733	2.75691	5.40503	2.41625	2.99355	2.85381	4.59718	2.84669	3.37024	1.53497	5.19235	4.37698	3.96699	0.00916336	6.18413	6.29289	3.39641	3.37353	3.54055
TCGA-28-2510-01	2.72109	1.734	1.24792	3.33087	3.87169	2.16294	2.73634	3.01309	4.72913	3.43106	3.3497	1.93085	4.40395	4.04419	3.16778	0.0243416	6.50832	5.48813	2.74991	3.68919	3.363
TCGA-06-2565-01	4.01238	2.40608	1.57593	3.6134	4.64801	2.67887	3.01421	3.46024	4.83108	3.47065	3.90236	2.63928	5.12044	3.73198	4.08673	0.0156719	7.0431	6.10972	3.21514	3.87135	3.95605
TCGA-06-0156-01	2.82183	1.98225	1.7554	3.88729	6.07548	2.55213	3.53274	2.09806	4.93213	2.8244	3.19425	2.2478	4.77676	4.49647	4.00546	0.0110491	6.47578	5.87575	2.89312	3.72811	3.87421
TCGA-14-1825-01	2.7973	1.96407	1.65758	4.43568	4.52792	2.8862	3.21745	2.60497	4.68221	3.38724	3.11032	1.834	4.55555	4.56717	4.04442	0.066739	6.86393	6.03091	2.75991	3.54036	3.90233
TCGA-41-3915-01	2.4616	2.10127	1.72313	3.70128	4.78254	2.3752	2.98872	2.14625	5.36911	2.94058	3.28598	1.75442	4.8314	4.24085	3.61289	0.0465278	6.25727	5.83296	2.93273	3.36682	3.79784
TCGA-06-2561-01	2.57651	2.17351	1.45319	3.21374	3.76455	2.51253	3.123	3.21856	4.33873	3.3583	3.36423	2.49157	4.63121	4.34774	3.66609	0.00739074	6.73901	5.44714	2.88284	3.97129	3.61399
TCGA-06-0678-11	2.23417	1.79542	1.36517	3.05398	3.57651	2.10042	2.89743	3.48604	5.32104	3.78314	3.56063	2.18737	4.4422	4.00949	3.63284	0.00321665	6.02524	5.19263	3.23451	4.25369	3.90375
TCGA-27-1830-01	3.07602	2.12923	1.64553	3.66789	5.22508	2.70422	3.33634	2.46931	5.05144	2.70702	3.54138	2.08584	4.85842	4.45012	3.67778	0.0412045	6.95961	5.96141	2.95178	4.05173	3.99541
TCGA-28-2499-01	2.52592	1.88265	1.42722	3.16458	3.76145	2.42997	3.40758	1.80456	5.09712	3.20227	3.37329	1.95309	4.53707	4.24514	3.63158	0.0193419	6.07407	5.83139	2.96334	3.8795	3.58928
TCGA-06-2567-01	3.26409	2.14565	1.97596	3.42021	5.06706	2.61708	3.64063	2.2274	5.31675	3.00244	3.52716	2.00002	4.92244	4.46708	3.84977	0.0243824	6.88315	6.13863	3.01936	3.44129	3.74922
TCGA-06-0686-01	3.55591	1.79606	1.37305	3.99281	4.36165	2.51549	3.19795	2.46616	5.08734	2.85678	3.31851	1.61153	4.4434	4.56208	3.29468	0.111802	6.96426	6.06482	2.5086	3.39502	4.15365
TCGA-27-2528-01	3.03541	2.17364	1.47799	3.27574	4.42847	2.58587	2.90392	3.23331	4.86363	3.25587	3.48227	1.75419	5.26128	4.45244	3.82263	0.054006	6.94198	6.19461	2.65906	3.86862	3.95584
TCGA-06-0184-01	2.64604	1.82668	1.32121	3.24452	4.35414	2.35037	3.03219	1.8924	5.07809	2.72814	2.98075	1.60508	4.68838	4.41198	3.58608	0.00604495	6.22014	6.05125	2.41845	3.46695	3.54547
TCGA-06-0744-01	3.98863	1.84925	1.16714	3.55009	4.56236	2.22719	2.94919	2.49759	4.26216	2.51175	3.31946	1.95126	4.65985	4.33981	3.29902	0.0136356	6.9988	6.37584	2.57557	3.62424	4.17426
TCGA-14-0787-01	3.37481	2.20481	1.27971	3.80613	4.69935	2.42929	3.09783	2.0967	5.23355	3.01496	3.33745	1.79459	5.25511	4.38049	3.24942	0.0157556	7.10607	5.83518	2.76511	3.79268	3.98778
TCGA-06-0178-01	3.37876	1.30155	1.06888	2.47115	4.34882	2.06356	2.19566	1.24848	3.78019	2.25122	2.26594	1.33849	4.26155	4.42632	3.26609	0.0158339	4.71778	6.85973	2.25986	3.50803	3.22949
TCGA-06-2557-01	3.49631	2.07782	1.68793	3.97454	3.81998	2.45054	2.92435	2.99359	5.07602	2.73444	3.49367	2.19756	5.04392	4.62505	3.74033	0.0180133	6.94108	5.82678	3.01729	3.80477	3.85882
TCGA-06-0675-11	2.03189	1.59137	1.4528	2.99817	3.22698	1.98463	2.7241	3.41091	5.05632	3.72025	3.34276	2.26278	4.23918	3.9181	3.4588	0.00295791	5.72622	4.86814	3.07222	4.34506	3.45421
TCGA-76-4927-01	2.73451	1.92302	1.46682	3.81998	4.34352	2.55709	3.25058	3.02232	4.88445	3.05335	3.32838	1.53015	4.89127	4.4619	3.48902	0.247469	6.99082	6.21092	2.534	3.10653	3.98321
TCGA-06-5858-01	2.96187	2.09215	1.72463	3.79279	4.24643	2.77181	3.60412	3.47603	5.15487	3.00986	3.63461	1.9247	4.55201	4.4941	3.77596	0.0539725	6.97001	6.00522	3.87842	3.96387	3.94911
TCGA-12-3653-01	2.83231	1.92772	1.72883	3.2399	3.58139	2.74537	3.81609	2.28805	5.06682	3.355	3.48822	1.73975	4.70695	4.52778	3.97673	0.0400783	6.85117	6.21834	3.0856	4.0477	4.25628
TCGA-12-3650-01	3.25582	1.42907	1.33711	3.62896	4.75091	2.27098	3.16275	2.20909	4.67188	3.0567	3.0218	1.54614	4.49021	4.40584	3.68616	0.0283746	6.80728	6.72159	2.74553	3.33603	4.08222
TCGA-32-2638-01	3.1375	2.13518	1.41495	3.32541	4.97265	2.49457	3.02318	2.94343	4.6791	3.13365	3.33782	1.98832	5.22494	4.31466	3.86872	0.015519	6.56536	5.82721	2.70009	3.54585	3.6649
TCGA-12-3652-01	2.79135	1.53005	1.54938	2.61661	4.96938	1.92165	2.33487	1.33645	5.10262	2.76602	2.73717	1.52063	4.59457	4.1353	3.83453	0.0265018	6.10716	6.91095	2.83397	3.4027	3.58807
TCGA-26-5134-01	2.62439	2.18917	2.47468	3.96417	4.19393	2.54105	2.94229	3.22058	4.95232	3.41767	3.5646	2.40195	4.66412	4.83116	3.68195	0.0829276	7.24407	5.87555	3.29609	3.29658	4.4799
TCGA-27-2524-01	2.83832	1.49954	1.34651	3.31086	4.83349	1.63187	2.48359	1.67316	5.23088	1.9691	2.90933	1.23888	4.21419	4.74609	2.91224	0.0608799	6.30251	6.44619	2.27527	3.44288	3.99812
TCGA-06-5856-01	3.19316	2.22069	1.75972	3.50675	4.47982	2.8831	3.09328	2.40832	5.16731	3.46019	3.59714	2.17977	4.71712	4.93536	3.75187	0.0304266	6.93785	6.13574	2.81283	3.72702	3.86066
TCGA-06-1804-01	3.77193	2.3473	1.92345	3.74366	4.07742	3.10075	3.52651	2.87743	5.63881	3.69211	3.96736	2.19123	5.21709	4.36554	3.89354	0.0180365	7.32825	6.03023	3.15551	4.49111	3.9544
TCGA-06-0646-01	2.73414	1.92932	1.44239	3.61508	4.9717	2.5201	3.37058	2.98534	4.84887	3.34228	3.3294	1.92457	4.96037	4.42365	3.64139	0.0170674	6.86745	5.54767	2.85178	3.86626	3.92423
TCGA-28-5218-01	2.21544	1.51986	1.54479	4.18204	3.55725	3.50039	3.33555	2.88451	5.31173	2.47053	3.1702	1.5167	4.59322	4.59488	4.61623	1.61927	6.65605	5.72257	2.90378	3.71889	4.04698
TCGA-02-2483-01	2.63349	2.10617	2.04276	4.42616	4.6343	3.15746	3.12991	2.72124	5.05486	3.07476	3.78	1.55302	4.65079	5.06377	3.98577	0.0118174	7.13464	6.62226	3.18407	3.99561	4.5605
TCGA-06-2562-01	3.17209	2.16457	1.53648	3.29105	4.33852	2.55823	3.02731	2.99567	4.90564	3.05263	3.33962	2.03309	5.05667	3.75496	3.86075	0.0997995	6.72654	5.81507	2.64024	3.63256	3.71436
TCGA-27-1837-01	3.00785	1.86719	1.27986	3.55176	4.01602	2.24418	3.17941	2.7435	4.72451	3.34569	3.20583	1.70531	4.86275	4.31913	3.37777	0.0672965	6.4055	5.8419	2.84759	3.44936	3.7638
TCGA-06-2559-01	3.52535	3.19764	2.05184	3.3754	4.95578	2.86038	3.4239	2.59858	5.02491	3.12159	3.7923	2.22513	4.76751	4.482	4.0102	0.0619497	7.18959	6.45643	3.28921	3.93735	3.94977
TCGA-06-0211-01	3.17814	1.80041	1.35411	3.75623	5.29083	2.67269	3.1659	2.8776	4.72842	3.16023	3.33227	1.84096	5.01749	4.47457	3.96594	0.02203	6.91065	6.11971	3.1906	3.57313	4.1939
TCGA-06-5416-01	2.8247	1.95314	2.20434	3.71153	4.41792	3.40757	3.01878	2.28419	5.08157	2.8362	3.3967	2.61222	4.58886	4.81454	3.67259	0.0590918	6.84711	6.32282	2.78286	3.34578	4.08068
TCGA-06-0238-01	3.32099	1.98352	1.42374	3.07127	4.64295	2.27872	2.90115	2.46986	4.44068	2.96852	3.3993	1.55462	4.59257	4.49623	3.62826	0.068097	6.80133	6.60908	2.91053	3.40004	3.8876
TCGA-14-1034-01	2.29329	2.1682	1.72689	3.52506	4.94265	2.22317	3.28544	2.39646	5.5654	3.25618	3.55993	1.39852	4.79051	4.97714	3.38396	0.0257237	6.69153	5.92271	2.79059	3.76891	4.05338
TCGA-19-2629-01	2.2261	2.12287	1.50485	4.05931	4.49421	2.48499	3.06337	3.06375	5.48283	3.86228	3.46301	1.87408	4.8818	4.66341	3.3372	0.00848915	6.50269	6.06521	2.94811	3.68033	4.50683
TCGA-19-2625-01	2.36526	1.75877	2.28949	2.94898	4.80459	2.16042	2.48477	1.76193	5.57089	3.00313	3.19947	1.68393	4.96516	4.90188	3.0996	0.0175393	6.32584	5.61718	2.56317	3.12099	3.79767
TCGA-06-5413-01	3.32742	2.18829	1.52552	3.56919	4.1388	2.5058	3.41106	2.81452	4.58614	3.375	3.47197	1.77066	4.52821	4.88575	3.89037	0.0839786	7.20428	6.59	2.65875	3.88079	3.81786
TCGA-12-5299-01	3.07525	1.91524	1.3683	3.49993	4.0503	2.56359	3.57235	2.7385	5.11717	3.04103	3.40679	1.24961	4.94299	4.59427	3.83283	0.0116514	6.56228	6.59999	2.55955	3.94557	3.88182
TCGA-06-0882-01	2.83956	2.09613	1.30379	3.19399	4.91682	2.32114	2.8441	2.85906	5.16358	2.90825	3.26852	2.02603	5.22903	4.26881	3.7603	0.00947052	6.44165	5.5906	2.85447	3.54356	3.54278
TCGA-06-0130-01	2.72197	2.07504	1.60486	3.36774	4.20043	2.63184	3.12699	2.36661	5.05568	2.79302	3.1739	2.25304	4.6178	4.71344	3.76497	0.00663714	6.81668	5.76876	2.76917	3.40323	3.72116
TCGA-76-4925-01	3.61458	2.32528	1.88169	4.11573	4.38901	2.81792	3.49177	3.31992	5.16358	3.10657	3.67423	1.78502	5.31247	4.70948	3.71133	0.00817206	7.36479	6.52887	2.87015	4.34162	4.25349
TCGA-06-5418-01	3.40894	2.01836	1.7133	3.19224	5.56312	2.50623	3.60676	2.78637	5.35208	2.0124	3.27125	1.60511	4.95517	3.53751	3.96773	0.00972998	6.58317	6.43064	2.45749	3.78988	3.56694
TCGA-06-0190-01	3.1927	1.80478	1.70396	3.57526	4.80422	2.51329	2.92615	2.08745	4.82195	2.87631	3.2961	1.88503	4.90576	4.63655	3.76042	0.3667	6.58528	5.92282	2.47228	3.45584	4.02589
TCGA-27-1835-01	3.44459	2.04648	1.56018	3.3632	3.75977	2.4838	3.28548	3.02625	3.95651	2.97309	3.54352	2.43871	4.8879	4.44183	3.29447	0.0173676	7.30936	5.72106	2.60788	3.85026	4.07966
TCGA-28-5216-01	2.14848	2.06245	1.57809	3.87866	4.60766	2.48597	2.59304	2.63767	5.19721	3.0943	3.54295	1.87362	4.43581	4.72888	3.34853	0.0320985	6.50232	6.16222	2.79387	3.51052	3.95222
TCGA-06-0680-11	2.27777	1.76091	1.29954	2.92408	3.26713	2.05615	2.65538	3.48314	4.95254	3.73545	3.37018	2.36747	4.08266	3.96698	3.50757	0	5.83078	4.87838	3.2837	4.41557	3.49321
TCGA-06-5411-01	2.55508	1.83571	1.10805	3.16559	4.61045	2.04501	3.02252	2.55723	4.60044	3.35774	3.12259	1.87416	4.32286	4.32629	3.45888	0.0306992	6.28242	5.80851	2.64337	3.7842	3.28463
TCGA-27-2519-01	2.13159	2.11238	1.71936	3.53113	5.55099	2.46436	3.06393	2.16997	5.23868	3.36353	3.30841	1.83142	5.03038	4.49141	3.51634	0.0174144	6.83126	5.98289	2.7201	3.88842	3.94832
TCGA-28-5213-01	2.56197	2.03387	0.984048	2.75919	5.87313	2.27047	2.77955	2.11375	4.64364	2.91674	2.91217	1.6218	4.54335	4.18937	3.78489	0.0427624	6.15164	6.19671	2.28402	3.49164	3.14045
TCGA-28-5209-01	2.97641	2.17259	1.89784	4.14436	3.9893	2.82591	3.27525	3.64037	5.17527	3.4482	3.74065	1.90658	4.77054	4.90895	3.96541	0.0294848	7.05311	6.4412	2.76278	4.05557	4.39694
TCGA-06-0219-01	2.46527	1.17487	1.18823	2.18198	5.91142	1.97821	2.30119	1.39072	4.0535	2.13535	2.56903	1.55999	4.12595	4.41033	3.4939	0.0103185	4.97274	6.50075	2.26966	3.42529	2.96421
TCGA-02-2486-01	2.23754	2.36783	1.12937	2.35683	5.53884	2.21806	3.01648	2.70697	5.251	2.32975	3.22863	1.33892	4.23451	4.09618	2.81145	0.0222552	6.1572	6.17754	2.65336	3.15577	3.44016
TCGA-06-0750-01	2.6776	1.91305	1.24743	3.34836	4.43647	2.12156	2.66434	2.31884	5.10324	3.01076	2.88813	1.77713	4.82206	4.2873	3.10565	0.0164595	6.53036	5.39666	2.25043	3.33143	3.47916
TCGA-15-1444-01	2.86656	2.24083	1.56995	3.31548	4.175	2.51912	2.96798	2.95017	4.87829	3.7072	3.67311	1.73093	4.75348	4.33766	3.81342	0.0163931	6.60536	5.99307	3.15685	3.71832	3.82511
TCGA-27-1832-01	2.67253	2.0134	1.69309	3.29978	4.47542	2.36768	2.69469	2.18991	5.26062	2.15455	3.41358	1.96919	5.41536	4.24436	3.26233	0.0292539	7.38385	6.08373	2.98295	3.26206	4.02223
TCGA-06-0174-01	2.99682	1.95086	1.76085	3.75821	4.33615	2.63286	3.54162	2.92198	4.94845	3.36031	3.51303	1.6378	4.76712	4.73379	3.94127	0.0687471	6.86608	6.37137	2.72091	3.8826	4.43058
TCGA-12-0616-01	3.04654	1.95815	1.43462	3.40883	4.50051	2.62646	3.07968	2.61389	4.75092	3.25777	3.28788	1.58574	4.68729	4.61275	3.58032	0.0462917	6.73378	6.69332	2.52312	3.73314	4.18213
TCGA-27-1834-01	2.67228	2.23201	1.55411	3.55673	4.21207	2.76726	3.3226	2.44676	4.95879	3.3187	3.50896	1.86113	4.41078	4.25407	3.74528	0.0113831	6.70148	5.8591	3.11519	4.01375	3.77918
TCGA-32-1970-01	3.30561	2.06656	1.76408	3.47238	4.32503	2.5603	3.49892	2.42859	4.88171	3.17296	3.71988	1.7965	4.81275	4.43693	3.56539	0.00990578	7.23187	5.86898	3.02095	3.88913	4.04874
TCGA-28-5215-01	2.3255	2.02661	1.60589	4.05752	4.06333	3.2327	2.93352	2.82433	4.39015	3.69588	3.50068	1.95613	4.73952	4.48801	4.2077	0.0529109	6.9474	5.93043	2.94988	3.58366	4.07057
TCGA-06-0132-01	1.92329	1.61762	1.05976	2.62093	5.24457	2.11947	2.73686	2.3942	4.7265	2.81763	2.79738	1.40671	4.36531	4.07648	3.69679	0.0105168	5.36011	5.50952	2.53777	3.48034	3.42588
TCGA-06-5408-01	2.38562	2.38025	1.94084	3.91923	4.95649	2.52051	3.52588	3.22913	5.32181	3.3769	3.92213	1.91158	4.74445	4.77248	3.46972	0.144052	7.07908	6.32509	2.85688	3.96562	4.08733
TCGA-28-5208-01	2.94668	2.16196	1.5492	3.52563	4.97315	2.71465	2.80503	3.27471	4.64177	3.28769	3.66585	1.86679	4.61538	4.82928	4.02661	0.0340445	7.38037	6.66201	2.85663	3.75254	4.39752
TCGA-28-2509-01	2.50333	1.83624	1.98326	3.76679	4.32849	2.43208	3.32826	2.64187	5.59026	3.11022	3.22651	1.71831	5.32555	4.73976	3.48514	0.0501642	6.57304	6.11024	2.8664	3.6214	3.82131
TCGA-19-5960-01	2.94094	2.55231	2.12879	4.26683	3.41123	3.20108	3.74963	3.98752	4.93251	3.96406	4.40931	2.32779	4.75054	4.992	3.82588	0.0206937	7.50985	5.99517	3.51067	4.44199	4.05407
TCGA-41-5651-01	3.29819	2.27453	1.62692	4.00635	4.26103	2.71814	3.23137	3.33129	4.84939	3.35779	4.12926	2.07497	5.28229	4.82836	3.48366	0.0194715	7.28964	6.2416	3.1001	4.08137	4.42084
TCGA-27-2521-01	3.06225	1.96937	1.35849	4.08941	4.89924	2.69318	3.02695	2.45722	4.95659	3.02742	3.53917	1.41991	5.52899	4.6693	3.50889	0.0216075	6.10992	6.32964	2.83408	4.02203	4.0562
TCGA-28-2513-01	1.78518	1.65597	1.186	3.21416	5.66993	2.28275	2.72864	2.64391	5.1687	3.06597	2.86108	1.60405	5.73262	4.05291	3.62484	0.0321629	6.07881	5.56574	2.18967	3.48541	3.51736
TCGA-06-0743-01	3.32719	1.95829	1.09888	3.09439	4.5259	2.04064	2.66254	2.60301	4.96212	2.79995	3.35624	1.95925	5.06347	4.01299	3.02722	0.0269906	7.23093	5.36585	2.50886	3.1261	3.82166
TCGA-76-4932-01	3.08457	1.81462	1.73439	3.72012	4.71336	2.48454	3.02812	2.91798	5.27268	3.02585	3.52226	1.55706	4.87223	3.74764	3.53255	0.0123981	7.00242	6.63897	2.54943	3.77046	4.03289
TCGA-08-0386-01	3.31978	1.91247	1.86797	3.69304	4.60235	2.59002	3.5797	3.33112	5.09604	3.31863	3.5815	1.61338	5.04128	4.73908	3.83739	0.0517709	6.80228	6.10477	3.25255	4.41522	4.01969
TCGA-06-0749-01	2.57455	1.69644	1.11177	2.90739	4.42794	2.03742	2.53213	2.24615	5.08962	2.67398	3.17796	1.41815	4.41787	3.80505	2.85172	0.010269	6.36224	5.5423	2.34451	3.23984	3.27794
TCGA-27-1831-01	2.9135	1.46793	1.40165	1.90375	5.05261	2.03881	2.5985	2.40533	3.75932	1.75284	2.82321	1.7269	4.4279	4.52215	4.21841	0.0225664	5.65013	6.61578	3.31671	3.85953	2.81776
TCGA-06-0139-01	2.65517	1.64813	1.08408	2.75238	5.53914	2.11433	2.36681	1.77874	4.41493	2.06458	2.56295	1.64195	4.45835	4.14177	3.72874	0.102762	5.4939	5.85784	2.19824	3.22772	3.07133
