# Supplementary material for: Integrating machine learning and bioinformatics analysis to m6A regulator-mediated methylation modification models for predicting glioblastoma patients’ prognosis and immunotherapy response
Source: Aging (Albany NY). 2023 May 23;15(10):4051–70. doi: 10.18632/aging.204495 (PMC10257999; doi:10.18632/aging.204495)
Supplement: Supplementary Table 5a [file aging-15-204495-s005.xls]

## Sheet: SupplementaryTable5_celluar-int
Supplementary Table 5a. Celluar-interactions.
from	to	spearman	pvalue	ewidth	ecolor
ALKBH5	ELAVL1	0.0993932	0.000546909	0.0993932	#FE999B
ALKBH5	HNRNPA2B1	0.0951986	0.000932619	0.0951986	#FE999B
ALKBH5	KIAA1429	0.187062	5.85664e-11	0.187062	#FE999B
ALKBH5	RBM15	0.107309	0.000188843	0.107309	#FE999B
ALKBH5	RBM15B	0.256268	1.54233e-19	0.256268	#FE999B
ALKBH5	WTAP	0.0766231	0.00776581	0.0766231	#FE999B
ALKBH5	YTHDF1	0.142001	7.37105e-07	0.142001	#FE999B
ALKBH5	YTHDF3	0.0813142	0.00471936	0.0813142	#FE999B
ALKBH5	ZC3H13	0.0905111	0.0016528	0.0905111	#FE999B
CBLL1	ELAVL1	0.350044	4.3704e-36	0.350044	#FE999B
CBLL1	FMR1	0.158924	2.87954e-08	0.158924	#FE999B
CBLL1	FTO	0.142864	6.30177e-07	0.142864	#FE999B
CBLL1	HNRNPA2B1	0.178953	3.88104e-10	0.178953	#FE999B
CBLL1	HNRNPC	0.199003	3.09019e-12	0.199003	#FE999B
CBLL1	KIAA1429	0.179906	3.1219e-10	0.179906	#FE999B
CBLL1	LRPPRC	0.294029	1.77553e-25	0.294029	#FE999B
CBLL1	RBM15B	0.084547	0.00329992	0.084547	#FE999B
CBLL1	WTAP	0.0805147	0.00514648	0.0805147	#FE999B
CBLL1	YTHDC1	0.0806706	0.00506054	0.0806706	#FE999B
CBLL1	YTHDC2	0.0877162	0.00229693	0.0877162	#FE999B
CBLL1	YTHDF1	0.10223	0.000376803	0.10223	#FE999B
CBLL1	YTHDF2	0.198289	3.70354e-12	0.198289	#FE999B
CBLL1	YTHDF3	0.318811	6.78953e-30	0.318811	#FE999B
ELAVL1	FMR1	0.146512	3.21617e-07	0.146512	#FE999B
ELAVL1	FTO	0.169632	3.07035e-09	0.169632	#FE999B
ELAVL1	HNRNPA2B1	0.36983	2.17833e-40	0.36983	#FE999B
ELAVL1	HNRNPC	0.32368	8.19132e-31	0.32368	#FE999B
ELAVL1	KIAA1429	0.263682	1.24495e-20	0.263682	#FE999B
ELAVL1	METTL3	0.116009	5.38695e-05	0.116009	#FE999B
ELAVL1	RBM15B	0.373916	2.5789e-41	0.373916	#FE999B
ELAVL1	WTAP	0.0829333	0.00395102	0.0829333	#FE999B
ELAVL1	YTHDC1	0.208493	2.60366e-13	0.208493	#FE999B
ELAVL1	YTHDF1	0.301789	8.16124e-27	0.301789	#FE999B
ELAVL1	YTHDF2	0.285913	4.02672e-24	0.285913	#FE999B
ELAVL1	YTHDF3	0.203691	9.2419e-13	0.203691	#FE999B
ELAVL1	ZC3H13	0.0761476	0.00815668	0.0761476	#FE999B
FMR1	FTO	0.239484	3.42654e-17	0.239484	#FE999B
FMR1	HNRNPA2B1	0.311384	1.58665e-28	0.311384	#FE999B
FMR1	HNRNPC	0.13415	2.93918e-06	0.13415	#FE999B
FMR1	KIAA1429	0.103006	0.00033972	0.103006	#FE999B
FMR1	METTL3	0.0891637	0.00193915	0.0891637	#FE999B
FMR1	WTAP	-0.219759	1.1789e-14	0.219759	#D0DCE9
FMR1	YTHDC1	0.416017	1.13994e-51	0.416017	#FE999B
FMR1	YTHDC2	0.272121	6.42832e-22	0.272121	#FE999B
FMR1	YTHDF2	-0.0951558	0.000937618	0.0951558	#D0DCE9
FMR1	ZC3H13	0.261704	2.45582e-20	0.261704	#FE999B
FTO	HNRNPA2B1	0.171495	2.04919e-09	0.171495	#FE999B
FTO	HNRNPC	0.0755696	0.00865528	0.0755696	#FE999B
FTO	KIAA1429	-0.209457	2.0113e-13	0.209457	#D0DCE9
FTO	LRPPRC	-0.0944024	0.00102967	0.0944024	#D0DCE9
FTO	RBM15	-0.113942	7.31681e-05	0.113942	#D0DCE9
FTO	WTAP	-0.269358	1.71625e-21	0.269358	#D0DCE9
FTO	YTHDC1	0.368115	5.28624e-40	0.368115	#FE999B
FTO	YTHDF1	-0.0887225	0.00204238	0.0887225	#D0DCE9
FTO	YTHDF2	-0.244157	7.92514e-18	0.244157	#D0DCE9
FTO	YTHDF3	0.0878436	0.00226318	0.0878436	#FE999B
FTO	ZC3H13	0.202194	1.36334e-12	0.202194	#FE999B
HNRNPA2B1	HNRNPC	0.352377	1.4091e-36	0.352377	#FE999B
HNRNPA2B1	KIAA1429	0.240899	2.20642e-17	0.240899	#FE999B
HNRNPA2B1	METTL3	0.44165	9.69031e-59	0.44165	#FE999B
HNRNPA2B1	RBM15B	0.15962	2.50061e-08	0.15962	#FE999B
HNRNPA2B1	YTHDC1	0.367564	7.02171e-40	0.367564	#FE999B
HNRNPA2B1	YTHDC2	0.215538	3.83555e-14	0.215538	#FE999B
HNRNPA2B1	YTHDF1	0.257506	1.01854e-19	0.257506	#FE999B
HNRNPA2B1	YTHDF3	0.36704	9.19134e-40	0.36704	#FE999B
HNRNPA2B1	ZC3H13	0.192524	1.5611e-11	0.192524	#FE999B
HNRNPC	KIAA1429	0.160958	1.90344e-08	0.160958	#FE999B
HNRNPC	LRPPRC	0.105661	0.00023707	0.105661	#FE999B
HNRNPC	METTL3	0.345152	4.54749e-35	0.345152	#FE999B
HNRNPC	RBM15	-0.0858553	0.00284544	0.0858553	#D0DCE9
HNRNPC	WTAP	0.107648	0.000180136	0.107648	#FE999B
HNRNPC	YTHDC1	0.368585	4.14966e-40	0.368585	#FE999B
HNRNPC	YTHDF1	0.136462	1.97129e-06	0.136462	#FE999B
HNRNPC	YTHDF2	0.2191	1.41961e-14	0.2191	#FE999B
HNRNPC	YTHDF3	0.30333	4.37766e-27	0.30333	#FE999B
KIAA1429	LRPPRC	0.266041	5.49565e-21	0.266041	#FE999B
KIAA1429	METTL3	0.116904	4.71085e-05	0.116904	#FE999B
KIAA1429	RBM15B	0.22351	4.04724e-15	0.22351	#FE999B
KIAA1429	WTAP	0.0789728	0.00607009	0.0789728	#FE999B
KIAA1429	YTHDC1	0.152054	1.12145e-07	0.152054	#FE999B
KIAA1429	YTHDF1	0.207434	3.45253e-13	0.207434	#FE999B
KIAA1429	YTHDF2	0.169002	3.51696e-09	0.169002	#FE999B
KIAA1429	YTHDF3	0.267683	3.09497e-21	0.267683	#FE999B
LRPPRC	WTAP	0.101649	0.000407002	0.101649	#FE999B
LRPPRC	YTHDC1	0.084759	0.00322207	0.084759	#FE999B
LRPPRC	YTHDF2	0.282596	1.40053e-23	0.282596	#FE999B
LRPPRC	YTHDF3	0.140947	8.91473e-07	0.140947	#FE999B
LRPPRC	ZC3H13	-0.0820274	0.00436565	0.0820274	#D0DCE9
METTL3	RBM15	0.152948	9.42676e-08	0.152948	#FE999B
METTL3	WTAP	-0.155233	6.02201e-08	0.155233	#D0DCE9
METTL3	YTHDC1	0.252421	5.51581e-19	0.252421	#FE999B
METTL3	YTHDF1	0.172342	1.7023e-09	0.172342	#FE999B
METTL3	YTHDF2	-0.0980781	0.000647959	0.0980781	#D0DCE9
METTL3	ZC3H13	0.0881781	0.00217668	0.0881781	#FE999B
RBM15	RBM15B	0.327312	1.64869e-31	0.327312	#FE999B
RBM15	YTHDC2	0.191212	2.15226e-11	0.191212	#FE999B
RBM15	YTHDF2	0.204721	7.06253e-13	0.204721	#FE999B
RBM15B	YTHDC1	0.0757762	0.00847401	0.0757762	#FE999B
RBM15B	YTHDC2	-0.0782067	0.00658228	0.0782067	#D0DCE9
RBM15B	YTHDF1	0.146092	3.47793e-07	0.146092	#FE999B
RBM15B	YTHDF2	0.241206	2.00483e-17	0.241206	#FE999B
WTAP	YTHDC1	-0.132277	4.04302e-06	0.132277	#D0DCE9
WTAP	YTHDC2	-0.0809792	0.00489428	0.0809792	#D0DCE9
WTAP	YTHDF1	0.271964	6.80021e-22	0.271964	#FE999B
WTAP	YTHDF2	0.214412	5.23369e-14	0.214412	#FE999B
WTAP	YTHDF3	0.260027	4.34837e-20	0.260027	#FE999B
WTAP	ZC3H13	-0.229742	6.56283e-16	0.229742	#D0DCE9
YTHDC1	YTHDC2	0.141564	7.97615e-07	0.141564	#FE999B
YTHDC1	YTHDF1	0.109714	0.000134708	0.109714	#FE999B
YTHDC1	YTHDF3	0.219502	1.26752e-14	0.219502	#FE999B
YTHDC1	ZC3H13	0.348482	9.27471e-36	0.348482	#FE999B
YTHDC2	YTHDF3	0.143312	5.80679e-07	0.143312	#FE999B
YTHDC2	ZC3H13	0.281786	1.89365e-23	0.281786	#FE999B
YTHDF1	YTHDF2	0.18567	8.15292e-11	0.18567	#FE999B
YTHDF1	YTHDF3	0.0982294	0.000635508	0.0982294	#FE999B
YTHDF2	YTHDF3	0.0974104	0.000705661	0.0974104	#FE999B
YTHDF2	ZC3H13	-0.118294	3.81721e-05	0.118294	#D0DCE9
