# Supplementary material for: Integrating machine learning and bioinformatics analysis to m6A regulator-mediated methylation modification models for predicting glioblastoma patients’ prognosis and immunotherapy response
Source: Aging (Albany NY). 2023 May 23;15(10):4051–70. doi: 10.18632/aging.204495 (PMC10257999; doi:10.18632/aging.204495)
Supplement: Supplementary Table 5b [file aging-15-204495-s006.xls]

## Sheet: SupplementaryTable5_celluar-typ
Supplementary Table 5b. Celluar-types.
	hr	lower.95	upper.95	pvalue	cluster	nsize	ncolor	nccolor
ALKBH5	1.22917	1.01328	1.49105	0.0357271	A	1.447	#2276BB	radgrad: center="0.5,0.5" radius="0.2" stoplist="1,1,1,255,0|1,1,1,255,0.5|255,255,255,0,1
RBM15B	1.20275	1.01439	1.42608	0.033341	A	1.47702	#2276BB	radgrad: center="0.5,0.5" radius="0.2" stoplist="1,1,1,255,0|1,1,1,255,0.5|255,255,255,0,1
HNRNPC	0.930992	0.759298	1.14151	0.49168	A	0.308318	#2276BB	radgrad: center="0.5,0.5" radius="0.2" stoplist="137,222,132,255,0|137,222,132,255,0.5|255,255,255,0,1
ELAVL1	1.14533	0.983512	1.33377	0.0797512	A	1.09826	#2276BB	radgrad: center="0.5,0.5" radius="0.2" stoplist="1,1,1,255,0|1,1,1,255,0.5|255,255,255,0,1
ZC3H13	0.996673	0.860049	1.155	0.964664	A	0.015624	#2276BB	radgrad: center="0.5,0.5" radius="0.2" stoplist="137,222,132,255,0|137,222,132,255,0.5|255,255,255,0,1
YTHDC2	1.05519	0.90632	1.22852	0.488966	A	0.310721	#2276BB	radgrad: center="0.5,0.5" radius="0.2" stoplist="1,1,1,255,0|1,1,1,255,0.5|255,255,255,0,1
FMR1	0.843043	0.713161	0.996578	0.04512	B	1.34563	#EC1122	radgrad: center="0.5,0.5" radius="0.2" stoplist="137,222,132,255,0|137,222,132,255,0.5|255,255,255,0,1
LRPPRC	0.761469	0.633285	0.915598	0.00376319	B	2.42444	#EC1122	radgrad: center="0.5,0.5" radius="0.2" stoplist="137,222,132,255,0|137,222,132,255,0.5|255,255,255,0,1
METTL3	0.914354	0.79175	1.05594	0.223272	B	0.651166	#EC1122	radgrad: center="0.5,0.5" radius="0.2" stoplist="137,222,132,255,0|137,222,132,255,0.5|255,255,255,0,1
YTHDF3	1.17276	1.01955	1.34899	0.0254943	B	1.59356	#EC1122	radgrad: center="0.5,0.5" radius="0.2" stoplist="1,1,1,255,0|1,1,1,255,0.5|255,255,255,0,1
HNRNPA2B1	1.12184	1.02125	1.23233	0.0160699	B	1.79399	#EC1122	radgrad: center="0.5,0.5" radius="0.2" stoplist="1,1,1,255,0|1,1,1,255,0.5|255,255,255,0,1
CBLL1	1.1022	0.949945	1.27885	0.198431	B	0.70239	#EC1122	radgrad: center="0.5,0.5" radius="0.2" stoplist="1,1,1,255,0|1,1,1,255,0.5|255,255,255,0,1
YTHDF2	1.34398	1.11866	1.6147	0.00159845	B	2.7963	#EC1122	radgrad: center="0.5,0.5" radius="0.2" stoplist="1,1,1,255,0|1,1,1,255,0.5|255,255,255,0,1
RBM15	1.00971	0.873803	1.16676	0.895806	C	0.0477863	#855124	radgrad: center="0.5,0.5" radius="0.2" stoplist="1,1,1,255,0|1,1,1,255,0.5|255,255,255,0,1
KIAA1429	1.02318	0.88028	1.18927	0.765255	C	0.116194	#855124	radgrad: center="0.5,0.5" radius="0.2" stoplist="1,1,1,255,0|1,1,1,255,0.5|255,255,255,0,1
YTHDC1	0.887568	0.751619	1.04811	0.159066	C	0.798421	#855124	radgrad: center="0.5,0.5" radius="0.2" stoplist="137,222,132,255,0|137,222,132,255,0.5|255,255,255,0,1
FTO	0.745353	0.656883	0.845738	5.03883e-06	C	5.29767	#855124	radgrad: center="0.5,0.5" radius="0.2" stoplist="137,222,132,255,0|137,222,132,255,0.5|255,255,255,0,1
YTHDF1	1.20659	1.01343	1.43658	0.0346581	C	1.46019	#855124	radgrad: center="0.5,0.5" radius="0.2" stoplist="1,1,1,255,0|1,1,1,255,0.5|255,255,255,0,1
WTAP	1.20781	1.08502	1.3445	0.000577863	D	3.23817	#FFBB64	radgrad: center="0.5,0.5" radius="0.2" stoplist="1,1,1,255,0|1,1,1,255,0.5|255,255,255,0,1
