# Supplementary material for: Integrating machine learning and bioinformatics analysis to m6A regulator-mediated methylation modification models for predicting glioblastoma patients’ prognosis and immunotherapy response
Source: Aging (Albany NY). 2023 May 23;15(10):4051–70. doi: 10.18632/aging.204495 (PMC10257999; doi:10.18632/aging.204495)
Supplement: Supplementary Table 7a [file aging-15-204495-s008.xls]

## Sheet: SupplementaryTable7_GSVA
Supplementary Table 7a. GSVA.
TCGA-06-5858-01	TCGA-06-0221-02	TCGA-19-0957-02	TCGA-19-4065-01	TCGA-19-4065-02	TCGA-14-1402-02	TCGA-06-0211-02	TCGA-06-0210-02	TCGA-06-0190-02	TCGA-19-5960-01	TCGA-14-0736-02	TCGA-19-1389-02	TCGA-06-0125-02	TCGA-06-0152-02	TCGA-06-0171-02	CGGA_1001	CGGA_1007	CGGA_1011	CGGA_1015	CGGA_1019	CGGA_1023	CGGA_1024	CGGA_1026	CGGA_1035	CGGA_1039	CGGA_1045	CGGA_1049	CGGA_1072	CGGA_1077	CGGA_1078	CGGA_1083	CGGA_1091	CGGA_1109	CGGA_1124	CGGA_1139	CGGA_1171	CGGA_1177	CGGA_1180	CGGA_1188	CGGA_1214	CGGA_1216	CGGA_1218	CGGA_1224	CGGA_1234	CGGA_1237	CGGA_1240	CGGA_1251	CGGA_1258	CGGA_1270	CGGA_1271
KEGG_GLYCOLYSIS_GLUCONEOGENESIS	0.558786	-0.355862	0.38227	0.188667	0.318239	-0.305886	-0.295692	0.341387	0.248295	-0.386735	-0.203406	0.172227	0.412337	-0.231897	-0.200665	-0.198981	0.309152	-0.264508	-0.31897	-0.252381	-0.146346	0.250803	0.236238	0.455272	0.18798	0.23263	0.513796	-0.218314	0.149862	0.388759	-0.299908	0.389933	0.420117	0.438085	-0.222215	0.259395	0.140003	0.136232	-0.4794	0.308739	0.25323	0.432801	-0.38555	-0.301759	-0.318847	0.437218	-0.344472	-0.351947	-0.213315
KEGG_CITRATE_CYCLE_TCA_CYCLE	0.29522	0.223408	-0.27694	0.289937	0.280513	0.283863	-0.216096	0.334487	-0.228893	-0.388084	0.228457	-0.299092	-0.199263	0.433528	-0.395761	-0.358188	-0.27336	0.152424	-0.336554	-0.3586	-0.434958	0.538554	-0.196329	-0.199182	0.325003	-0.165157	0.280193	0.483885	0.302949	0.508602	-0.188037	0.300247	0.614631	0.296146	-0.286503	0.204861	-0.193351	-0.515761	-0.579026	-0.246781	-0.252499	-0.185656	-0.498905	0.254464	0.419999	0.326757	0.315759	-0.377735	-0.31483
KEGG_PENTOSE_PHOSPHATE_PATHWAY	0.430623	-0.312766	0.30497	0.27247	0.431717	-0.43106	-0.20024	0.30115	0.259741	-0.351003	-0.275882	0.170563	0.400878	-0.261445	0.186762	0.262539	0.473091	-0.228422	-0.234505	-0.293709	-0.195064	0.248887	0.276703	0.387858	0.291737	-0.212853	0.428517	-0.254238	0.265715	0.383312	0.18338	0.399283	0.218346	0.594754	-0.170138	0.288824	0.328833	0.341398	-0.425115	0.409135	0.38964	0.504955	-0.302554	-0.257573	-0.302671	0.421509	-0.330431	-0.237851	0.21976
KEGG_PENTOSE_AND_GLUCURONATE_INTERCONVERSIONS	-0.342324	-0.313615	-0.572845	0.578998	-0.399791	0.462067	-0.299633	0.367309	0.534533	-0.518634	0.477488	0.453573	-0.346125	-0.4808	0.289034	0.357233	-0.517992	-0.570295	0.322644	-0.393329	-0.479307	0.501061	0.290137	0.434116	-0.421865	-0.282872	0.322004	-0.351859	0.243873	0.451264	0.226764	0.374643	0.302677	0.565911	-0.372578	0.390974	-0.336935	-0.503574	-0.454741	0.457168	0.26265	0.439557	0.284753	0.435339	-0.311	0.473538	-0.265681	-0.430473	-0.17448
KEGG_FRUCTOSE_AND_MANNOSE_METABOLISM	0.39652	-0.307431	0.323572	0.236422	0.344264	-0.241675	-0.127756	0.352362	0.244771	-0.39465	0.198213	0.163641	0.313943	-0.429956	0.214054	0.28754	0.330728	-0.247467	-0.233447	-0.210656	0.260126	0.293887	-0.316808	0.430849	-0.149021	0.300873	0.421233	-0.278022	0.299665	0.284646	0.292188	0.426989	0.29358	0.333701	-0.273977	0.271405	0.247028	0.278073	-0.295706	0.4177	0.125595	0.321723	-0.310533	-0.31277	-0.49696	0.350634	-0.488962	-0.302369	-0.213738
KEGG_GALACTOSE_METABOLISM	0.443755	-0.47615	-0.337474	0.294241	0.309283	-0.397662	0.154346	0.271308	0.607423	-0.534063	-0.239235	0.381334	0.35144	-0.421609	0.371569	0.321885	-0.23724	-0.484964	0.289195	0.270744	0.296878	0.424947	-0.407482	0.531784	-0.283795	0.463698	0.47716	-0.439403	0.39014	0.236963	0.265888	0.460083	0.389226	0.559171	-0.15476	0.31389	0.494499	0.244755	-0.299444	0.42007	0.346609	0.26615	0.321352	-0.165623	-0.350246	0.645352	-0.371172	-0.246364	0.258426
KEGG_ASCORBATE_AND_ALDARATE_METABOLISM	-0.586656	-0.232117	0.603933	-0.41603	-0.351057	0.257999	-0.645844	0.38544	0.337798	0.340957	0.303765	0.477892	0.462959	-0.390773	-0.279133	-0.225494	0.495514	-0.421541	-0.480492	-0.719058	-0.491086	-0.300877	0.408847	-0.275445	-0.418347	-0.618746	0.598577	-0.435088	-0.416712	0.466041	-0.685384	-0.36653	0.488633	-0.449927	0.588939	0.37083	-0.464941	-0.314271	-0.36835	0.556926	0.588218	0.354816	-0.325726	-0.594948	-0.378799	-0.318884	-0.46339	0.400694	-0.591521
KEGG_FATTY_ACID_METABOLISM	-0.14448	-0.30463	0.32901	0.141894	-0.419327	0.418465	-0.197744	0.342415	-0.370601	-0.287153	0.497553	-0.254285	0.150613	-0.253952	0.218278	0.152225	0.526793	0.270735	-0.380843	-0.432154	-0.302865	0.233296	0.283264	-0.16123	-0.311634	-0.306434	0.280686	-0.287682	0.18539	0.660492	-0.268771	-0.309427	0.51647	0.283211	0.392174	0.378407	-0.284273	-0.192458	-0.272748	0.315247	0.431696	0.358546	0.222136	0.207992	-0.217622	0.202147	0.298124	-0.279575	-0.225853
KEGG_STEROID_BIOSYNTHESIS	0.627266	-0.32142	0.593158	0.168124	-0.357332	0.171698	-0.438298	-0.31245	0.182043	-0.522156	0.189516	0.522682	-0.605572	0.316276	0.306749	0.333859	-0.247478	-0.252118	-0.384712	-0.274187	-0.497739	0.737994	-0.618616	0.140504	-0.308601	0.260271	-0.500908	0.595204	0.31973	0.248448	0.262884	-0.296972	-0.359762	0.304258	0.279661	-0.350713	-0.187736	0.195561	-0.418292	-0.324551	0.437337	-0.301853	-0.227852	0.577336	-0.279705	0.34777	0.51354	0.221103	0.486832
KEGG_PRIMARY_BILE_ACID_BIOSYNTHESIS	-0.529571	-0.601131	0.343019	0.325264	-0.456908	0.386301	-0.477744	0.451023	-0.268277	-0.534381	0.615432	0.269898	0.437191	-0.613761	0.656527	0.475853	0.302927	0.48825	-0.494609	0.403312	0.298883	-0.246627	-0.360106	-0.294417	-0.560708	0.309981	0.362699	-0.601346	0.317571	0.658662	0.364526	-0.469136	0.536304	0.574926	0.643218	0.58477	0.430797	0.265787	0.329879	-0.302314	0.605075	0.712798	0.559596	0.510364	-0.254198	0.62842	0.421002	0.345991	0.54782
KEGG_STEROID_HORMONE_BIOSYNTHESIS	0.307625	-0.632034	-0.542624	0.496739	-0.338768	0.605264	-0.239939	-0.346087	0.266281	-0.578534	0.489792	0.573328	0.420448	0.293244	0.304931	0.587038	-0.391964	0.442313	-0.213439	0.361636	0.23484	0.434505	-0.554275	0.296307	-0.600508	0.306355	-0.223198	-0.38743	0.35565	0.485181	0.494368	0.529057	0.50453	0.558128	0.501384	-0.319413	-0.21759	0.330604	0.480618	0.350539	0.245875	0.462991	0.544741	0.576079	-0.424151	0.622403	-0.44473	-0.314187	0.515566
KEGG_OXIDATIVE_PHOSPHORYLATION	-0.38659	0.161104	-0.186593	0.449935	0.26655	0.549683	0.425601	-0.255618	-0.38306	-0.395051	0.597876	-0.280643	-0.523893	-0.362241	-0.42418	-0.291016	-0.211299	-0.206886	-0.45037	0.307904	0.164238	0.160362	-0.328709	-0.248429	0.105471	0.198489	-0.299941	-0.274189	0.340735	0.377705	-0.319096	-0.339804	0.426339	-0.16318	0.269589	-0.187138	0.252237	-0.264258	-0.212579	-0.315791	0.177974	0.191681	0.135785	0.282636	0.47061	0.241015	0.362336	-0.2096	0.510198
KEGG_PURINE_METABOLISM	-0.153437	0.14589	-0.235027	0.208776	0.225979	0.280332	0.173401	-0.165346	0.208831	-0.159383	0.255513	-0.142285	-0.333954	-0.154447	-0.336486	-0.215821	-0.18049	-0.227399	-0.180352	-0.196776	0.150523	0.146521	-0.252789	-0.203497	0.17048	0.201425	-0.262353	0.216911	0.24343	-0.220547	-0.261932	0.221434	-0.243857	0.132189	0.157447	-0.261227	0.218756	0.284302	0.197651	0.251703	-0.136978	-0.310597	0.187454	-0.125191	0.220247	-0.214957	0.165407	0.234593	0.178925
KEGG_PYRIMIDINE_METABOLISM	0.185635	-0.225132	-0.347508	0.388746	0.203267	0.39616	0.227787	-0.181102	-0.124686	0.248872	0.252193	0.172864	-0.424981	0.228664	-0.504249	-0.334013	-0.253396	-0.308516	-0.20114	-0.173511	0.202328	0.132162	-0.293249	-0.204961	0.339695	0.289841	-0.153524	0.22052	0.364124	-0.30386	-0.301196	0.206035	-0.176923	0.167794	-0.227164	-0.344713	0.230327	0.384131	-0.214376	0.313374	0.190333	-0.366282	0.129567	0.169416	0.395631	-0.193769	0.205154	0.235852	-0.149996
KEGG_ALANINE_ASPARTATE_AND_GLUTAMATE_METABOLISM	0.209829	0.259562	0.255398	0.235029	0.301444	0.164869	-0.2903	-0.340307	-0.256863	-0.232851	0.224691	-0.338226	0.425008	0.293158	-0.336449	-0.385883	0.157719	-0.455079	-0.375006	0.197205	0.268125	0.287139	-0.424163	0.301529	0.197514	0.211754	-0.306366	-0.195218	-0.213421	0.211392	-0.260271	-0.334511	-0.198542	-0.185278	0.321531	-0.191366	0.280166	-0.223422	-0.217912	-0.308582	0.47037	0.306621	-0.316213	-0.254592	-0.189912	-0.271854	0.20686	-0.264017	0.309158
KEGG_GLYCINE_SERINE_AND_THREONINE_METABOLISM	0.380363	-0.171093	0.27262	0.18487	-0.471765	0.272891	0.362283	-0.208705	-0.460938	0.258779	0.438503	-0.415692	0.266263	0.223422	-0.283968	-0.229887	0.482238	-0.293258	-0.558935	0.412128	0.46671	-0.303162	0.335749	-0.294093	0.235606	-0.146386	-0.311932	-0.341595	0.248247	0.472235	-0.310669	0.164898	0.430944	-0.260555	0.503473	-0.211636	-0.475207	0.217846	0.219897	0.400218	0.456878	0.35044	-0.36856	-0.362236	0.27584	0.22079	0.168345	0.296217	0.181124
KEGG_CYSTEINE_AND_METHIONINE_METABOLISM	0.314439	0.185083	0.250201	0.202688	-0.284878	0.296537	0.274307	-0.176607	-0.238243	0.246673	0.250535	-0.276134	-0.331502	-0.257171	-0.338975	-0.20745	0.284769	-0.232032	-0.312733	0.277789	0.204829	-0.448627	-0.28695	0.238426	0.327616	0.288225	-0.300731	-0.148392	-0.194321	0.23199	-0.265423	-0.263434	-0.312145	0.30211	-0.147293	-0.254415	-0.267278	0.292563	0.20834	-0.20854	0.307679	-0.227396	-0.256027	-0.20706	0.104431	0.169668	0.196397	-0.223262	0.309992
KEGG_VALINE_LEUCINE_AND_ISOLEUCINE_DEGRADATION	0.224012	-0.280882	0.300281	0.187965	-0.463821	0.474429	-0.271202	0.366993	-0.522476	0.154277	0.473023	-0.351594	0.194021	-0.213674	-0.19898	-0.282053	0.408065	0.166638	-0.531842	-0.400572	-0.181621	0.186478	0.302657	-0.27736	-0.277381	-0.304248	0.178335	0.296268	0.184784	0.681311	-0.389637	-0.311145	0.613876	-0.235218	0.422933	0.337274	-0.42011	-0.199865	-0.191276	0.408189	0.529085	0.435049	-0.187484	0.225489	0.234507	-0.185463	0.346655	0.212215	-0.174707
KEGG_VALINE_LEUCINE_AND_ISOLEUCINE_BIOSYNTHESIS	0.618862	-0.350434	-0.504174	0.362092	0.327951	-0.36461	-0.452784	-0.254039	-0.499337	0.526123	-0.36945	-0.469882	0.479961	0.579984	-0.34219	-0.846518	0.616798	0.217771	-0.444351	-0.340322	0.497147	-0.297734	0.297127	-0.374475	-0.254616	0.371431	0.329986	-0.245159	0.572203	0.350772	-0.327185	-0.286508	0.524138	-0.562178	0.300945	-0.655888	-0.545431	0.534252	0.364534	0.631614	0.393927	-0.462171	-0.425932	0.482588	0.498008	0.47476	-0.461852	0.300453	-0.545202
KEGG_LYSINE_DEGRADATION	0.37926	0.272271	0.259347	-0.264177	-0.230604	-0.22447	-0.455929	0.309103	-0.216757	0.353574	-0.322315	-0.343109	0.27315	0.226749	-0.215528	-0.23493	0.311975	-0.321277	-0.296967	-0.377887	-0.17204	-0.220323	0.207179	-0.297888	0.410146	-0.417794	0.325009	0.260716	-0.300105	0.378471	-0.257055	0.189179	0.241067	-0.336511	0.189704	-0.207245	-0.452044	-0.197309	-0.193289	0.275343	0.247718	-0.231163	-0.328558	-0.253799	-0.240584	-0.317055	-0.264089	0.188422	-0.409861
KEGG_ARGININE_AND_PROLINE_METABOLISM	0.168844	-0.212467	0.339818	0.171779	0.352547	0.187343	-0.202814	-0.209297	-0.242581	-0.299324	0.314967	-0.241865	0.221641	0.169015	0.19479	0.220953	0.3341	0.193731	-0.33237	-0.202616	-0.212814	0.31845	-0.245379	0.195395	-0.181837	-0.193434	0.226117	-0.301016	0.224393	0.332818	-0.186985	0.269741	-0.244455	0.268672	0.329858	0.234167	0.212768	-0.227506	-0.178625	-0.242972	0.3591	0.330773	-0.153772	0.206734	-0.242147	0.280301	-0.224815	-0.251424	0.326355
KEGG_HISTIDINE_METABOLISM	-0.199884	-0.378093	0.333482	0.227968	-0.277684	0.41698	-0.207146	-0.20073	-0.445289	-0.186533	0.570127	0.334426	0.249423	-0.493439	-0.283608	-0.192082	0.416219	0.321161	-0.504628	-0.369958	-0.263695	0.281963	0.261697	-0.280234	0.255991	0.20859	0.33887	-0.261834	0.282581	0.415627	-0.456087	-0.365914	0.651721	0.414493	0.646958	0.428652	-0.246452	0.330416	-0.180903	0.359116	0.471628	0.370404	-0.224474	-0.347234	0.301836	-0.201911	-0.217821	0.291625	0.234893
KEGG_TYROSINE_METABOLISM	-0.179672	-0.383415	0.182938	0.194374	0.288135	0.394563	0.313195	-0.292555	-0.267571	-0.518246	0.559023	-0.212363	0.255788	-0.348726	0.256074	0.33303	0.342862	0.225292	-0.310892	0.470351	0.318985	0.373971	-0.386963	0.390161	0.261813	0.271337	-0.411469	-0.420319	0.328162	0.291399	0.269681	0.271479	0.415807	0.559884	0.48892	0.268081	0.332994	0.388561	0.376315	-0.257871	0.394751	0.395457	0.231133	0.339896	-0.178432	0.483098	0.281449	0.144999	0.492431
KEGG_PHENYLALANINE_METABOLISM	0.255589	-0.440829	0.599472	-0.379689	0.472891	0.215676	-0.339479	-0.35431	-0.287796	-0.663485	0.417274	0.257283	0.44986	-0.284928	0.576627	0.547101	0.438999	0.343571	-0.268232	0.59869	0.431229	-0.260536	-0.516796	0.684848	-0.511989	0.203547	-0.382775	-0.307381	0.401363	0.409701	0.558658	0.400933	0.316416	0.745651	0.444072	0.405125	0.546893	0.352869	0.382585	-0.615002	0.469166	0.563393	0.453806	-0.255466	-0.347497	0.625671	-0.611499	-0.325757	0.630501
KEGG_TRYPTOPHAN_METABOLISM	-0.23037	-0.337349	0.459684	-0.251288	-0.443218	0.290932	-0.265951	0.460183	-0.387824	-0.297501	0.519266	-0.197533	0.239928	-0.346386	0.298245	0.29998	0.441792	0.307596	-0.442499	-0.370692	-0.227754	-0.232745	-0.316507	-0.264155	-0.267187	-0.519034	0.44332	-0.341676	0.155639	0.56632	-0.256845	-0.326878	0.430253	0.369073	0.438434	0.461271	-0.268732	-0.17976	-0.194911	0.268681	0.519564	0.520024	0.342815	-0.273339	-0.230133	0.223124	-0.207257	0.208975	0.285839
KEGG_BETA_ALANINE_METABOLISM	-0.178934	-0.262124	0.483792	-0.259228	-0.337743	0.230722	-0.427956	0.389455	-0.385339	0.260634	0.38776	-0.220543	0.172348	-0.342901	0.180769	-0.170339	0.459702	0.412477	-0.387113	-0.558719	-0.372043	-0.28584	0.292626	0.303635	-0.305895	-0.34497	0.434654	-0.217785	0.211117	0.529872	-0.467928	-0.365383	0.432975	0.241071	0.544446	0.37334	-0.31454	0.232137	-0.167793	0.391624	0.45616	0.308773	0.221384	-0.208299	-0.20368	0.276815	0.239908	0.299924	-0.243816
KEGG_TAURINE_AND_HYPOTAURINE_METABOLISM	0.436103	-0.828619	-0.611279	-0.273607	-0.480623	0.453231	0.680328	-0.560326	-0.345897	-0.410303	0.629128	-0.433816	-0.425172	0.399705	0.400005	-0.507817	0.810442	0.509185	-0.522886	0.347221	0.745741	-0.891617	0.481233	-0.497108	-0.449832	0.448915	-0.4004	-0.788491	0.34891	0.64011	0.699828	-0.617812	-0.546143	0.494849	0.74809	0.74501	-0.432226	0.713731	0.813497	0.716853	0.662015	0.688703	0.517498	-0.380539	0.235612	-0.697944	-0.644302	0.821228	0.302265
KEGG_SELENOAMINO_ACID_METABOLISM	-0.188455	-0.178086	-0.406292	0.268155	-0.467505	0.457394	0.525537	-0.255441	-0.40223	0.351496	0.545148	-0.340814	-0.388055	-0.305739	-0.375553	-0.417578	0.375899	-0.266001	-0.39687	-0.445157	-0.249407	0.235648	0.255979	-0.218457	0.391426	0.344047	0.172111	0.267227	-0.234538	-0.188638	-0.348753	-0.363208	0.351029	0.38375	0.352882	-0.206205	-0.227052	0.280671	-0.235547	0.325608	0.445253	-0.357603	-0.386946	-0.237134	0.163355	-0.205007	0.309509	0.251845	-0.352237
KEGG_GLUTATHIONE_METABOLISM	0.156863	-0.33741	-0.220117	0.388394	0.232963	0.290414	0.159371	0.296742	0.202816	-0.448615	0.352975	0.219955	-0.466303	-0.236069	-0.227752	0.338316	0.391157	0.167108	0.164878	0.413724	-0.174062	-0.236392	-0.397843	0.211174	-0.265011	-0.231076	0.300061	-0.239714	0.444095	0.339359	0.378786	0.33002	0.211789	0.493717	0.232606	0.363227	0.281958	0.275531	-0.263743	0.205504	0.400115	0.355111	0.341136	0.374672	0.249965	0.350475	0.276531	0.25197	0.309126
KEGG_STARCH_AND_SUCROSE_METABOLISM	0.37313	-0.535844	-0.240184	0.283937	0.308834	-0.450899	-0.340337	-0.206604	0.587269	-0.492265	-0.299617	0.478496	0.611683	-0.449557	0.402952	0.305147	0.289747	0.278214	0.481824	-0.246652	-0.257452	0.508967	-0.213457	0.621536	-0.422863	0.517728	0.506145	-0.22839	0.360991	0.303167	0.462835	0.330673	0.326311	0.533497	-0.355935	0.40101	0.499633	-0.178959	-0.470611	0.221261	0.420083	0.26263	0.217368	0.361296	-0.545828	0.642637	-0.36172	-0.325713	-0.176122
KEGG_N_GLYCAN_BIOSYNTHESIS	-0.179	-0.356757	-0.297473	0.443627	0.26901	0.187285	0.325269	-0.165728	0.376946	-0.31119	-0.190308	0.438553	-0.213361	0.188838	0.214486	0.334595	-0.390275	0.424908	0.35061	0.264347	-0.426102	-0.213676	-0.160081	0.476278	-0.322269	0.347163	0.411745	0.260931	0.269271	-0.195901	0.389867	0.141769	-0.27244	0.383194	-0.378526	0.205968	0.437973	-0.197802	-0.471947	-0.386097	-0.299573	0.231555	0.321395	0.502065	-0.221011	0.47099	0.209817	0.186124	0.184228
KEGG_OTHER_GLYCAN_DEGRADATION	-0.324995	-0.62187	-0.472671	0.402852	0.195963	-0.246384	-0.334795	0.421305	0.556951	-0.572228	-0.232407	0.620377	0.246136	-0.404411	0.512743	0.66613	-0.209705	0.51296	0.576337	0.554991	0.157431	-0.245243	-0.293297	0.435379	-0.648403	0.487474	0.310672	-0.497392	0.555218	-0.195355	0.595864	-0.35659	-0.291472	0.579989	-0.421927	0.673662	0.505673	0.294288	0.264783	-0.460939	0.217759	0.713645	0.715115	0.63521	-0.473586	0.433469	-0.374796	-0.312264	-0.301806
KEGG_O_GLYCAN_BIOSYNTHESIS	-0.254704	-0.547202	-0.340546	0.315012	0.472166	-0.405371	-0.248019	0.361082	0.453816	-0.370949	-0.235477	0.400056	0.327412	-0.408877	0.517525	0.403186	0.315249	0.527162	0.466381	-0.254255	-0.489958	0.334723	-0.367679	0.593786	-0.457872	0.332496	0.464797	-0.130126	0.184844	0.245472	0.307035	-0.330146	0.286968	0.31243	-0.22355	-0.293066	0.460213	-0.331271	-0.490709	-0.532852	0.426289	-0.316043	0.461188	0.421948	-0.416485	0.555402	-0.329359	-0.323697	-0.37456
KEGG_AMINO_SUGAR_AND_NUCLEOTIDE_SUGAR_METABOLISM	0.297607	-0.576432	-0.356652	0.46956	0.376926	0.168415	-0.118087	-0.331861	0.539804	-0.540879	0.340798	0.525318	0.172019	-0.454523	0.214086	0.277674	0.192927	-0.192049	0.387005	0.25903	-0.262402	0.281974	-0.375257	0.580301	-0.371829	0.409089	0.486704	-0.235824	0.411697	0.220378	0.305497	0.194057	-0.219023	0.533867	-0.251836	0.304554	0.569541	0.287162	-0.216558	0.228738	0.395793	0.179996	0.389061	0.283752	-0.267185	0.553406	-0.237797	-0.185484	0.409596
KEGG_GLYCOSAMINOGLYCAN_DEGRADATION	-0.288295	-0.705629	-0.721394	0.424093	0.194373	-0.464576	-0.289152	0.553398	0.610637	-0.365085	-0.268251	0.847721	0.226204	-0.171907	0.587449	0.637783	0.216375	0.151832	0.678445	0.553392	0.334034	-0.206831	0.312144	0.453549	-0.621784	0.482183	0.257324	-0.516522	0.566675	0.253113	0.725404	-0.206185	0.251071	0.502054	-0.177391	0.369309	0.569044	0.1517	0.450288	-0.26683	0.363174	0.432406	0.605367	0.671184	-0.54223	0.680343	-0.447475	0.237304	0.38662
KEGG_GLYCOSAMINOGLYCAN_BIOSYNTHESIS_CHONDROITIN_SULFATE	0.284957	-0.471893	-0.320409	-0.294774	0.391216	-0.573676	0.341931	0.468088	0.446584	-0.549689	-0.437838	0.386752	0.453627	0.558876	0.161346	0.577108	-0.33982	0.41559	0.400298	0.415124	-0.262583	0.448407	0.223049	0.39562	-0.673192	-0.200132	0.229557	-0.31391	0.374462	-0.282124	0.527699	0.455387	-0.307662	0.372469	-0.241071	-0.367406	0.462025	-0.234064	-0.278707	-0.350442	0.34857	-0.224232	0.502633	0.318521	0.384563	0.399049	-0.267039	0.340873	-0.400093
KEGG_GLYCOSAMINOGLYCAN_BIOSYNTHESIS_KERATAN_SULFATE	-0.418292	-0.363269	-0.50139	0.283541	0.360519	-0.29631	0.511464	-0.244522	0.659163	-0.565802	0.329416	0.3692	0.350769	-0.235219	0.329349	0.463699	0.657095	-0.225349	0.540532	0.407192	-0.259051	0.423542	0.335373	0.476964	-0.513506	0.464115	0.307409	-0.301957	0.30633	-0.277367	0.449285	0.321413	0.192298	-0.218572	-0.237719	-0.468388	0.547093	0.278088	0.22767	0.198074	-0.330158	-0.426107	0.396717	0.553545	-0.309458	0.482996	-0.300166	0.283334	0.323973
KEGG_GLYCOSAMINOGLYCAN_BIOSYNTHESIS_HEPARAN_SULFATE	-0.404634	0.248174	-0.427523	0.413331	-0.25037	-0.446612	0.322948	0.486461	0.303525	-0.240909	-0.225307	0.331567	0.198351	0.319808	-0.358827	0.193174	-0.251568	0.448112	0.29761	-0.230399	-0.468056	0.504619	-0.261317	0.210245	-0.318469	-0.34282	0.292674	0.265086	0.198755	-0.165426	0.496529	0.354774	-0.225025	-0.257847	-0.364095	0.177335	0.330911	-0.455522	-0.416784	-0.376983	-0.300605	-0.158014	0.368289	0.467592	-0.253918	0.311698	-0.228454	-0.255902	-0.434263
KEGG_GLYCEROLIPID_METABOLISM	0.330212	-0.261247	0.292954	-0.286837	0.233243	-0.402137	-0.44823	0.208564	0.238495	-0.285117	0.186122	0.246437	-0.234686	-0.231716	0.322708	-0.257563	0.344214	-0.245458	-0.342805	-0.197387	0.177766	-0.310698	0.270524	-0.282117	-0.3822	-0.147717	0.16469	-0.210367	0.252608	0.255891	0.194891	-0.227918	0.342374	0.263713	0.372262	0.314777	0.229273	0.26645	0.253807	-0.304773	-0.226396	0.268996	0.202039	-0.229436	-0.270721	-0.172458	-0.412055	0.18919	0.327622
KEGG_INOSITOL_PHOSPHATE_METABOLISM	0.302587	0.331319	-0.247443	-0.369831	0.196824	-0.418815	-0.381623	0.303252	-0.236208	-0.17667	-0.235967	-0.246933	0.385183	-0.201057	0.395705	0.156441	0.362797	0.205001	-0.280386	-0.213512	0.198819	0.243607	0.300266	-0.175627	0.208065	-0.273787	-0.163979	0.303985	-0.35437	0.345354	0.173828	-0.210523	-0.21142	-0.279519	-0.180003	0.137764	-0.258938	-0.336335	0.200893	-0.386815	0.170562	0.314469	-0.356516	-0.281824	-0.470338	-0.221143	-0.308205	-0.351989	-0.189608
KEGG_GLYCOSYLPHOSPHATIDYLINOSITOL_GPI_ANCHOR_BIOSYNTHESIS	-0.331032	-0.541571	-0.184468	0.417376	-0.217016	0.401861	0.29769	-0.233561	-0.395811	0.142152	0.483631	0.519483	-0.205062	-0.28242	-0.343511	0.194379	-0.332595	0.273226	0.193674	-0.316815	0.261483	-0.384048	0.246903	-0.199716	-0.352509	0.232403	0.348512	0.262361	0.459393	-0.24648	0.28091	-0.17648	0.365886	0.271545	-0.212827	0.344512	0.175315	-0.277138	-0.345699	-0.291706	0.224785	0.31073	-0.169038	0.295864	0.266938	0.252585	-0.174221	-0.315428	0.436103
KEGG_GLYCEROPHOSPHOLIPID_METABOLISM	-0.21969	0.269923	0.219444	-0.219986	0.181134	-0.267115	-0.278334	-0.163237	-0.263302	-0.198364	0.324414	-0.166413	0.159738	0.182988	0.243852	-0.266678	0.309749	0.3074	-0.278825	-0.272427	0.242374	0.23508	0.209926	-0.196968	-0.322429	-0.174723	0.201579	-0.234015	0.227179	0.417256	0.273093	-0.330435	0.341227	0.201859	0.262306	0.231346	-0.184418	-0.173961	0.288629	-0.419873	-0.176932	0.260616	-0.207535	0.179796	-0.172134	-0.220519	-0.171407	-0.14037	0.239411
KEGG_ETHER_LIPID_METABOLISM	0.278514	0.252995	0.527099	-0.305724	-0.388579	-0.212863	-0.443543	0.454648	-0.411265	0.397334	0.382604	-0.214909	0.382554	-0.387849	0.262762	-0.422685	0.369899	0.503723	0.343907	-0.419198	-0.37449	-0.358831	-0.675476	0.255732	-0.295449	-0.401169	0.308042	-0.386152	-0.229475	0.54665	0.333476	-0.455753	-0.18899	0.242901	-0.285527	0.490808	-0.253321	-0.17038	-0.309646	-0.37784	0.233885	0.56907	0.25919	0.376152	-0.331184	-0.276063	0.296203	-0.309946	0.418413
KEGG_ARACHIDONIC_ACID_METABOLISM	-0.408872	-0.415548	0.284459	0.31004	-0.325118	0.34948	0.264896	0.557871	0.301902	-0.476261	0.473499	0.238231	-0.339774	0.160573	0.423867	0.566261	0.223891	0.401657	0.303249	0.530044	-0.190176	-0.468617	-0.311755	0.283949	-0.257221	0.169896	-0.175284	-0.45369	0.416932	0.638628	0.492569	-0.2612	-0.288535	0.50619	0.268869	0.590467	0.334856	0.284536	0.197017	-0.25337	0.311598	0.593308	0.540557	0.237796	-0.233306	0.326541	-0.323736	0.278511	0.405066
KEGG_LINOLEIC_ACID_METABOLISM	0.432579	-0.532892	0.419883	0.691459	-0.657313	0.400326	-0.693593	0.594088	-0.538067	0.478736	0.564327	-0.580491	0.406132	-0.575986	-0.696272	-0.436488	0.772597	0.768768	0.781094	-0.519911	-0.543745	-0.585672	-0.610674	0.561146	-0.59335	-0.364238	0.506388	-0.66246	0.351527	0.833045	0.700406	-0.65242	0.321178	0.341707	0.414994	0.729462	-0.518561	0.622288	-0.484163	-0.557927	0.318301	0.793827	0.264859	0.680784	-0.470714	-0.630259	-0.576856	-0.341373	0.482694
KEGG_ALPHA_LINOLENIC_ACID_METABOLISM	0.415639	0.306914	0.232615	-0.373953	-0.800328	-0.257795	-0.238496	0.643983	-0.612948	0.325148	0.37642	-0.373064	0.48951	0.369419	-0.418117	-0.2903	0.714598	0.457225	0.41333	-0.430219	0.342988	0.420583	-0.466078	-0.293914	-0.363358	-0.371178	0.393617	-0.633033	-0.265579	0.812656	-0.442324	0.265375	0.321276	-0.347739	0.419361	0.362217	-0.610926	0.415686	0.266403	0.353486	0.456779	0.385663	-0.385301	-0.32399	-0.454571	-0.70369	-0.581982	-0.280518	-0.29296
KEGG_SPHINGOLIPID_METABOLISM	-0.246195	-0.341846	0.368234	0.270748	0.1472	-0.231405	-0.358041	0.349468	0.265544	-0.528806	0.115219	0.257482	0.296585	-0.411069	0.495989	0.45288	-0.164448	0.267123	-0.208119	0.265797	-0.467852	0.230721	-0.392166	0.321258	-0.366673	-0.21172	-0.428385	0.154441	-0.183938	-0.167062	0.318222	-0.158379	-0.29113	0.367978	-0.304941	0.414857	0.408475	-0.331038	-0.325604	-0.482949	-0.383035	0.516187	0.396921	0.359954	-0.335471	0.348464	0.417864	-0.370921	0.235756
KEGG_GLYCOSPHINGOLIPID_BIOSYNTHESIS_LACTO_AND_NEOLACTO_SERIES	-0.371395	-0.262373	-0.497355	0.256708	-0.157683	0.321744	0.362079	-0.313943	-0.312504	0.243168	0.691279	0.244402	-0.309898	-0.503824	-0.306322	0.352217	0.287007	0.332375	-0.252009	0.195858	0.293693	0.192846	-0.35172	0.245686	-0.415373	0.309197	-0.315818	-0.255569	0.5302	0.262092	-0.147523	0.241302	-0.262563	0.205196	0.2597	-0.220825	0.320111	0.152109	0.365999	0.276732	-0.256327	-0.274996	0.236658	0.45908	0.282041	-0.266053	0.302387	0.338979	0.286416
KEGG_GLYCOSPHINGOLIPID_BIOSYNTHESIS_GLOBO_SERIES	-0.436353	-0.589517	-0.498816	0.243423	0.527543	0.196737	0.401694	0.226218	0.476347	-0.441918	0.427727	0.462209	0.239503	-0.406689	0.515145	0.692353	0.327115	0.339606	0.594577	0.47216	0.221576	-0.34926	0.200644	0.46462	-0.625709	0.335679	0.253556	-0.435646	0.502278	0.338867	0.551176	0.184628	-0.222916	0.581049	0.346273	0.401875	0.605841	0.241552	0.347531	0.18583	0.534591	0.380208	0.674453	0.614436	-0.313488	0.534819	-0.34868	0.191102	0.441765
KEGG_GLYCOSPHINGOLIPID_BIOSYNTHESIS_GANGLIO_SERIES	-0.673676	-0.355416	-0.306661	-0.250548	0.496871	-0.217294	0.392783	0.305591	0.302084	-0.506227	0.376176	0.337595	0.246864	-0.340996	0.367737	0.620082	-0.262484	0.41331	0.333567	0.531975	-0.398538	0.291033	0.205199	0.433361	-0.482095	-0.163984	-0.235674	-0.209897	-0.287176	-0.214594	0.539081	0.527299	-0.228497	0.413554	0.185766	-0.278892	0.471498	-0.223675	0.245233	-0.191823	-0.273489	0.394262	0.681985	0.51431	-0.288433	0.349237	0.217188	-0.28754	0.356176
KEGG_PYRUVATE_METABOLISM	0.319567	0.129218	0.371467	0.218053	0.226359	0.274261	-0.368941	0.187417	-0.415173	-0.215483	0.356609	-0.213258	-0.225296	0.21261	-0.236583	-0.244292	-0.253671	-0.239638	-0.522366	-0.291634	-0.239936	0.171017	-0.279069	-0.245399	0.167909	-0.334057	-0.1996	0.187696	-0.166275	0.59373	-0.302312	-0.262514	0.553895	-0.212083	0.448832	0.317699	-0.38049	-0.17618	-0.30941	-0.270837	0.417	0.306208	-0.31865	-0.223041	0.265114	-0.160332	-0.275993	-0.185498	0.237532
KEGG_GLYOXYLATE_AND_DICARBOXYLATE_METABOLISM	-0.309657	0.357081	-0.354166	0.490314	0.470355	-0.185362	-0.213397	-0.297238	0.342902	-0.262022	0.225253	0.327507	-0.425352	0.444306	-0.519017	-0.193548	-0.274156	-0.425215	-0.500656	0.292046	-0.259923	0.603974	-0.508892	-0.321815	0.335566	0.401349	-0.337303	-0.263781	0.418493	-0.163218	-0.312556	0.34428	-0.273439	0.339186	-0.424425	-0.312595	0.295891	-0.378555	-0.485026	0.304551	-0.59943	-0.175269	-0.333106	0.236423	-0.295437	0.35465	0.463522	-0.38265	0.377793
KEGG_PROPANOATE_METABOLISM	0.206853	-0.168815	0.464413	0.229853	-0.380365	0.388106	-0.359978	0.399673	-0.4658	0.2997	0.410234	-0.460366	-0.196549	-0.179541	-0.176534	-0.37104	0.331872	0.272401	-0.543831	-0.539749	-0.351835	0.263589	0.353785	-0.326963	0.180743	-0.481082	-0.181896	0.282212	-0.188765	0.699719	-0.47181	-0.412778	0.595903	-0.333739	0.460994	0.309118	-0.406951	-0.281038	-0.312112	0.339045	0.427089	0.34117	-0.269961	0.251202	0.259413	-0.286439	0.352894	-0.197096	-0.215064
KEGG_BUTANOATE_METABOLISM	0.279775	-0.129241	0.474997	-0.253717	-0.346813	0.43846	-0.572379	0.283586	-0.450204	-0.231194	0.565296	-0.345444	0.17214	-0.345732	-0.348766	-0.288173	0.49059	0.175902	-0.547328	-0.473187	-0.32495	0.242785	0.311971	-0.349323	0.222029	-0.454955	0.199063	-0.189606	-0.15948	0.648312	-0.531308	-0.297862	0.598728	-0.333134	0.601909	0.350742	-0.516328	0.246508	0.178963	0.463935	0.505172	0.31205	-0.230117	-0.20242	0.178412	-0.205875	-0.281694	0.165192	-0.224081
KEGG_ONE_CARBON_POOL_BY_FOLATE	0.370023	-0.233023	-0.315874	0.462984	0.17766	0.290898	0.243527	-0.249955	0.324612	0.208813	-0.300656	0.365443	-0.440376	-0.167242	-0.428222	-0.349368	-0.228932	-0.531862	-0.309984	-0.339214	0.317257	0.212166	0.275042	-0.285273	0.302286	0.259871	-0.433245	0.367982	0.170888	-0.191388	-0.312593	0.156632	0.207338	-0.185483	-0.396746	-0.390476	-0.406306	0.249213	-0.334495	0.236011	-0.283382	-0.40988	0.243642	0.367755	0.267471	0.427263	0.184705	-0.218443	-0.286832
KEGG_RIBOFLAVIN_METABOLISM	-0.315235	-0.284524	-0.203754	0.622217	-0.202072	0.428735	0.286488	-0.447737	0.205903	-0.353071	0.356396	0.50637	-0.628474	0.292419	-0.35536	-0.48362	-0.613931	0.34062	-0.345665	0.324167	-0.367793	-0.387496	-0.429858	0.282017	-0.285466	0.533316	0.513467	0.4801	0.391653	-0.272283	0.31742	-0.404021	-0.202229	0.489844	-0.386552	0.343283	0.411252	0.265295	-0.329532	-0.33862	-0.201871	0.314164	0.307699	0.382747	0.263381	0.505709	-0.223284	0.352875	0.314792
KEGG_NICOTINATE_AND_NICOTINAMIDE_METABOLISM	-0.341201	-0.349604	-0.30962	0.211958	0.329195	0.448279	-0.283298	0.368937	-0.259436	-0.34416	0.492889	0.363005	-0.222118	-0.280041	0.224421	0.221591	-0.218995	0.322527	0.237653	0.256829	0.202839	0.237714	0.272796	-0.307539	-0.418056	-0.180597	-0.444247	0.277271	0.341174	0.371236	0.244264	-0.175782	0.540436	0.342601	0.27569	0.496713	0.422559	0.3947	0.243402	-0.406385	0.209187	0.389582	0.371368	-0.281768	0.265173	0.277508	-0.381284	0.350798	-0.214648
KEGG_PANTOTHENATE_AND_COA_BIOSYNTHESIS	0.355497	-0.452981	-0.3322	0.289962	0.287287	0.347318	-0.408689	-0.465715	0.267054	-0.293437	0.310256	0.507666	-0.258057	0.269227	-0.262323	0.30041	-0.233737	0.25452	0.46947	-0.309489	-0.323698	0.275623	-0.35508	0.345205	-0.361228	0.424061	0.36467	-0.216103	0.3687	0.192646	0.26114	-0.364599	-0.204506	0.409913	-0.276064	0.264947	0.603725	0.499272	0.353391	0.235997	0.396152	-0.346083	0.462861	0.406551	0.272913	0.572676	0.401278	0.347579	0.246752
KEGG_FOLATE_BIOSYNTHESIS	-0.604265	-0.44868	-0.427265	0.484213	0.276425	0.472352	0.611767	-0.428273	0.664158	-0.484622	0.29166	0.726486	-0.622643	0.436823	-0.486887	-0.463668	-0.677048	-0.613346	-0.287008	0.348157	0.249419	-0.410095	-0.550509	0.341943	-0.303833	0.512359	-0.529579	0.408151	0.614084	-0.309554	-0.477798	-0.397564	0.267295	0.718374	0.320483	-0.345576	0.636397	0.504325	0.311885	0.312869	0.38273	-0.300188	0.482084	-0.413655	0.63485	0.50096	0.192089	0.638333	0.579467
KEGG_RETINOL_METABOLISM	-0.452452	-0.602473	-0.194737	0.415029	-0.486799	0.430899	0.198133	0.177472	0.338736	-0.428183	0.533982	0.518532	-0.349586	-0.370058	0.433128	0.356707	0.388495	0.41448	-0.371132	0.418185	0.242501	0.275434	-0.2569	-0.335606	-0.353046	0.491774	0.263692	-0.588805	0.296329	0.339461	0.224071	-0.439549	0.285677	0.342113	0.474423	0.528096	0.406621	0.295109	0.377525	0.154815	0.50978	0.542522	0.384983	0.241127	-0.24777	0.251	0.264802	0.317363	0.426229
KEGG_PORPHYRIN_AND_CHLOROPHYLL_METABOLISM	0.241201	-0.430831	-0.244567	0.402927	0.405601	0.361394	-0.251342	-0.151577	0.133864	-0.359005	0.668229	0.233237	-0.429289	-0.358737	0.20462	0.303619	0.219642	-0.378898	0.201173	0.316455	-0.217043	-0.30311	-0.461067	0.326527	-0.56667	0.251521	0.2979	0.348465	0.391196	0.368182	0.337992	0.359653	0.157082	0.484931	0.353668	0.205323	0.359917	0.409868	0.294747	0.158636	0.420977	-0.245925	0.345039	0.292991	-0.311364	0.439926	-0.459982	0.342438	0.392293
KEGG_TERPENOID_BACKBONE_BIOSYNTHESIS	0.461327	-0.237368	0.269784	0.230683	-0.391672	0.515636	-0.488963	-0.382765	-0.413066	0.20444	0.506707	0.258309	-0.4266	0.403354	-0.588871	-0.403174	0.342471	-0.502294	-0.458704	-0.512788	-0.367395	0.665616	-0.442245	-0.371974	0.427048	0.238763	-0.371226	0.708237	-0.257033	-0.22958	-0.508427	-0.315232	0.374821	0.177774	0.514847	-0.35853	0.270453	-0.209203	-0.390229	0.579607	0.270052	-0.455253	-0.312257	0.215732	0.38372	-0.168634	0.64684	0.270264	-0.221572
KEGG_LIMONENE_AND_PINENE_DEGRADATION	-0.230661	-0.244725	0.701332	-0.351114	-0.251191	0.299674	-0.657135	0.420686	-0.458007	0.197317	0.504777	0.209489	0.239304	-0.514373	0.272431	-0.207802	0.486342	0.51911	-0.630548	-0.682516	-0.558195	0.34345	0.238644	0.29424	-0.271324	-0.475174	0.561025	-0.258721	0.298237	0.623351	-0.653892	-0.525454	0.529257	-0.335854	0.593569	0.492805	-0.410779	-0.238108	-0.346576	0.4713	0.514293	0.468163	0.385269	-0.363638	0.298721	-0.359904	0.339604	0.263858	0.254554
KEGG_NITROGEN_METABOLISM	-0.331803	0.346149	0.393037	0.36387	-0.233513	0.427938	-0.330306	-0.680272	-0.336507	-0.269066	0.366695	-0.482209	0.386835	-0.198251	-0.423878	-0.557093	0.331169	-0.221527	-0.542126	-0.190439	0.370022	0.346157	0.360473	0.333295	0.360796	0.272644	0.48003	-0.381231	-0.374072	0.534748	-0.250048	-0.398064	0.176453	-0.37575	0.294764	-0.300469	-0.611733	-0.301689	-0.217855	-0.628477	0.416194	0.350144	-0.326041	0.329162	-0.478675	-0.353693	-0.262142	-0.266264	0.2253
KEGG_SULFUR_METABOLISM	-0.418515	-0.418437	-0.390993	0.317162	0.282305	-0.411258	0.605713	0.446469	0.388006	-0.539476	0.496469	0.536643	-0.21981	0.272204	0.357392	0.458892	0.536542	0.626982	0.299998	-0.48108	-0.420231	0.420551	-0.287859	-0.471343	-0.594492	-0.328506	0.438407	-0.320587	-0.270237	0.466861	0.36137	-0.281257	-0.352501	0.348655	-0.297507	0.338002	0.31006	-0.386631	-0.414322	-0.233585	0.516581	-0.318455	0.432097	-0.302456	0.477024	0.31644	0.476053	0.476931	-0.355149
KEGG_AMINOACYL_TRNA_BIOSYNTHESIS	-0.259867	-0.264245	-0.53692	0.338563	-0.288236	0.412963	0.476919	-0.174247	-0.384132	0.430145	0.391518	-0.266873	-0.317316	0.288482	-0.414222	-0.440901	-0.21764	-0.520123	-0.37559	-0.150321	0.273907	0.228379	-0.221824	-0.326892	0.200357	0.418395	0.268562	0.240517	0.603467	-0.399676	0.246099	-0.195564	0.393942	0.324817	0.301584	-0.220773	0.175838	0.517842	-0.269356	0.198095	-0.24769	-0.441481	0.127598	0.325312	0.480635	-0.397883	0.357036	0.308001	0.20849
KEGG_METABOLISM_OF_XENOBIOTICS_BY_CYTOCHROME_P450	-0.291484	-0.475782	0.212927	0.329728	0.187675	0.436584	-0.249643	0.237644	0.298075	-0.480368	0.784088	0.242154	-0.637854	-0.636838	0.253924	0.522329	0.420829	0.329373	0.165117	0.492068	0.216135	-0.313947	-0.383956	-0.258565	-0.349568	-0.309655	0.338108	0.237231	0.497166	0.572274	0.362205	-0.264707	0.440359	0.524606	0.509436	0.616788	0.336782	-0.175115	0.259464	-0.354791	0.429233	0.61167	0.337117	0.41309	0.284803	0.328683	0.388888	0.284848	0.572386
KEGG_DRUG_METABOLISM_CYTOCHROME_P450	0.228093	-0.445948	0.307781	0.385995	-0.183727	0.405083	-0.22942	0.2504	-0.338809	-0.395339	0.760076	-0.269106	-0.413797	-0.582376	0.291509	0.506271	0.413475	0.334886	-0.30647	0.456504	0.376273	-0.264568	-0.27924	-0.326369	-0.239244	-0.407986	0.274228	0.273474	0.507192	0.622748	0.36339	-0.232895	0.387253	0.557135	0.517439	0.617632	-0.216723	0.322015	0.348331	-0.220668	0.519213	0.629991	0.248754	0.360733	0.176863	-0.327415	0.386063	0.392401	0.523697
KEGG_DRUG_METABOLISM_OTHER_ENZYMES	-0.229905	-0.496355	-0.577795	0.5427	0.403039	-0.2575	0.245937	-0.248131	0.51017	-0.372742	-0.220092	0.500285	-0.345377	0.432563	-0.340958	0.254129	-0.255343	-0.313968	0.343974	0.455868	0.215294	0.279045	0.20065	0.450009	0.271208	0.662341	0.493946	-0.345399	0.532129	-0.36772	0.290037	-0.242979	-0.224883	0.593586	-0.256601	0.240091	0.440258	0.327756	0.291235	-0.341679	0.227732	-0.340808	0.350321	0.283094	0.351203	0.502885	-0.392424	0.237417	0.286231
KEGG_BIOSYNTHESIS_OF_UNSATURATED_FATTY_ACIDS	0.397813	0.266542	0.409972	-0.254336	-0.336988	0.20993	-0.295265	0.517595	-0.437085	-0.319994	0.279548	0.310371	0.268304	-0.263016	-0.336292	-0.272074	0.202978	0.43567	-0.423325	-0.397485	-0.383508	0.692274	-0.48957	-0.441811	-0.302625	-0.311777	0.187919	-0.310276	-0.436525	0.527934	-0.420229	0.291309	0.393926	-0.340712	0.187941	-0.192379	-0.567097	-0.324042	-0.275527	0.481198	0.347907	0.416745	-0.309985	0.358288	-0.300423	-0.268124	0.500984	-0.393872	-0.312071
KEGG_ABC_TRANSPORTERS	0.281602	0.194598	-0.212243	0.253617	-0.236329	-0.284444	-0.217406	0.248159	-0.344436	-0.265996	0.146508	-0.339097	0.184882	0.232484	0.481405	-0.381025	0.308484	0.187234	-0.303319	-0.270573	0.362552	-0.335976	0.439175	-0.379449	0.261575	0.311853	-0.225962	-0.275558	0.345037	0.34708	0.298681	-0.393716	0.278936	-0.186639	0.286865	0.498201	0.19002	-0.233099	0.360095	-0.194167	0.32084	0.336586	0.392889	0.209868	-0.301834	0.131695	-0.280212	0.238767	-0.130848
KEGG_RIBOSOME	-0.567099	-0.177977	-0.355372	0.812422	0.175925	0.582019	0.689834	-0.467096	0.441155	0.485634	-0.124001	-0.500441	-0.68727	-0.454886	-0.568029	0.150797	-0.713365	-0.170825	-0.535385	0.328218	-0.327863	-0.630023	0.480472	0.546921	0.779305	-0.381227	-0.404929	0.171019	-0.309227	-0.600759	-0.642744	0.436836	-0.55894	-0.449022	-0.716199	-0.247284	0.272785	-0.496797	-0.129084	-0.595277	-0.688041	0.188145	-0.400736	0.510887	0.110473	0.488113	0.7404	-0.735359	-0.487007
KEGG_RNA_DEGRADATION	-0.211552	-0.0989218	-0.300874	0.343701	0.197437	0.379167	0.310739	-0.335822	0.109853	0.454184	-0.262245	-0.18717	-0.380604	-0.252647	-0.381521	-0.346178	-0.327113	-0.343931	-0.150719	-0.27168	-0.240626	-0.35538	0.178193	0.242103	0.323874	0.293305	-0.171668	0.260873	0.269818	-0.380756	-0.357925	0.202682	-0.30218	0.234108	-0.256922	-0.426399	0.107557	0.296426	-0.271823	-0.248825	-0.265819	-0.547619	-0.235286	-0.165051	0.373289	-0.30138	0.369181	0.207993	-0.190799
KEGG_RNA_POLYMERASE	-0.246953	0.205528	-0.220705	0.369261	-0.200847	0.455118	0.317181	0.226731	-0.302608	0.293212	0.360299	-0.23714	-0.398561	-0.261127	-0.494585	-0.448139	-0.292651	-0.243759	-0.219308	0.178668	0.194229	0.181983	-0.435362	0.206823	0.316573	0.156086	-0.1753	0.303561	0.269919	-0.399843	-0.304983	0.314105	-0.291423	-0.2944	-0.203639	-0.509221	-0.146512	0.407345	-0.21835	0.360866	0.294887	-0.537602	-0.183164	0.155419	0.411924	-0.457772	0.316438	0.316541	-0.234941
KEGG_BASAL_TRANSCRIPTION_FACTORS	0.298404	-0.233037	-0.355801	0.337379	0.221528	0.408836	0.287835	-0.366602	0.174657	0.402669	0.226596	0.18616	-0.449838	-0.302776	-0.427525	-0.399924	-0.441072	-0.308431	-0.166347	-0.402775	-0.374543	0.219167	-0.217524	-0.296515	0.415608	0.175935	0.304914	0.334465	0.310805	-0.468693	-0.411748	-0.239368	-0.38967	0.180043	-0.265593	-0.33866	-0.304502	0.273305	-0.290543	-0.28118	-0.28917	-0.484543	-0.236167	0.217219	0.41527	-0.359157	0.391205	0.411432	-0.304288
KEGG_DNA_REPLICATION	0.601273	0.193403	-0.391133	-0.190013	-0.157044	0.357563	0.230824	-0.192368	0.149225	0.685438	-0.365951	0.370344	-0.618144	0.483345	-0.747715	-0.477119	-0.223032	-0.623878	-0.334365	-0.455879	-0.173611	-0.369751	0.228079	-0.261569	0.591476	0.439986	-0.340561	0.432124	0.475793	-0.512183	-0.551666	0.301713	-0.389003	0.452182	-0.368442	-0.495056	-0.105978	0.604155	-0.345559	0.371512	-0.272412	-0.58315	-0.28743	-0.290821	0.583819	-0.20357	0.33286	0.434574	-0.150506
KEGG_SPLICEOSOME	0.23473	0.298238	0.120152	0.225154	0.169975	0.277723	0.231245	-0.156955	-0.153754	0.429018	-0.359597	-0.199522	-0.327316	0.243834	-0.425484	-0.491288	-0.346656	-0.239908	-0.130479	-0.200614	0.252444	-0.355744	0.252735	-0.248829	0.471302	0.347953	-0.237864	0.276196	0.315995	-0.511807	-0.518624	-0.276684	-0.35733	-0.273263	0.220558	-0.406302	-0.261917	0.499618	0.256257	0.358452	-0.161201	-0.508656	0.130207	-0.278046	0.424471	-0.319479	0.355498	0.419485	-0.232707
KEGG_PROTEASOME	-0.297243	-0.315417	-0.419003	0.432108	0.544474	0.494352	0.358816	0.269151	0.25524	-0.209052	0.321206	0.0997483	-0.652875	0.292739	-0.603652	-0.508794	-0.375586	-0.194295	0.429811	-0.260176	-0.586451	0.250105	-0.154552	0.299559	0.147719	0.435845	0.444477	0.341853	0.551003	-0.369055	-0.463864	-0.460485	-0.402734	0.400643	-0.246834	-0.353787	0.673175	0.287879	-0.290097	0.148545	0.239834	-0.386318	0.249715	0.560086	0.678463	0.514463	0.322387	-0.24871	0.354597
KEGG_PROTEIN_EXPORT	0.256551	-0.377302	-0.291702	0.407611	0.29564	0.487015	0.541754	-0.248622	0.305661	-0.423416	0.253795	0.287648	0.240807	-0.3563	-0.575929	-0.519747	-0.436287	0.289236	-0.272106	-0.254794	-0.451704	-0.200673	0.348146	0.501619	0.327199	0.42021	0.482807	-0.196128	-0.340712	-0.250257	-0.512345	-0.407736	0.167862	-0.138317	0.264307	0.326244	0.296029	0.24713	-0.344008	0.255098	0.257115	0.271978	-0.2835	0.404359	0.52428	0.363481	0.512689	0.312493	-0.298094
KEGG_PPAR_SIGNALING_PATHWAY	0.221205	-0.381092	0.354382	0.22521	-0.396515	-0.234615	-0.19222	0.346321	0.191434	-0.392609	-0.2136	0.135989	0.279426	0.279824	0.460505	0.308813	0.316644	0.477903	-0.296832	0.330726	-0.172692	0.186363	0.164846	0.252884	-0.224593	-0.147998	0.277891	-0.368316	0.189854	0.507072	0.241196	0.281533	0.304185	0.33494	-0.199569	0.381143	0.280325	-0.151797	-0.225437	0.196501	-0.18348	0.38551	-0.251744	0.303964	-0.300145	0.397585	0.20334	-0.363425	-0.26362
KEGG_BASE_EXCISION_REPAIR	0.355825	0.161309	-0.392781	0.333358	0.164055	0.373932	0.216905	0.192339	0.12379	0.486612	0.232119	0.187738	-0.602077	0.276839	-0.522553	-0.329254	-0.333837	-0.523918	-0.196041	0.295948	0.287525	-0.207606	-0.220032	-0.208529	0.267271	0.273365	-0.345546	0.307717	0.460237	-0.342282	-0.294618	0.398162	-0.269392	0.317077	0.225731	-0.386224	-0.143743	0.423866	0.285761	0.427129	0.310886	-0.394545	0.170468	-0.131249	0.365067	-0.173569	0.326852	0.312588	0.160035
KEGG_NUCLEOTIDE_EXCISION_REPAIR	0.296346	-0.174033	-0.366242	0.273336	-0.206716	0.465273	-0.185044	-0.450132	-0.21232	0.438989	0.2513	0.234904	-0.363296	-0.169157	-0.432741	-0.381656	-0.260059	-0.412834	-0.310139	-0.276283	0.154257	-0.291919	0.266709	-0.235137	0.347057	0.404879	-0.164058	0.372868	0.364102	-0.271996	-0.465394	-0.19748	0.171142	0.316424	-0.178491	-0.251805	-0.19008	0.361164	-0.273562	0.187354	-0.210381	-0.359561	-0.249586	-0.169331	0.399886	-0.241	0.248545	0.226715	-0.233261
KEGG_MISMATCH_REPAIR	0.53783	-0.138004	-0.36961	0.206911	-0.363806	0.381533	0.260912	-0.155469	0.212267	0.691766	-0.24392	0.31153	-0.536217	0.310207	-0.62826	-0.564651	-0.182389	-0.585961	-0.281436	-0.499965	-0.216006	-0.342134	0.299557	-0.160965	0.471029	0.453893	0.180524	0.359398	0.53129	-0.419388	-0.446921	0.202917	0.181731	0.511465	-0.379688	-0.411028	-0.205396	0.500782	-0.433135	0.32935	0.278865	-0.560761	-0.396719	-0.266416	0.601184	0.168904	0.476086	0.240534	-0.243257
KEGG_HOMOLOGOUS_RECOMBINATION	0.479542	0.244384	-0.496214	0.247818	-0.323894	0.514944	0.309039	-0.232874	-0.2354	0.476157	0.198677	-0.18985	-0.591965	0.400979	-0.539227	-0.514506	-0.364991	-0.459994	-0.285214	-0.310577	0.386998	-0.207627	0.431468	-0.406971	0.530481	0.397852	-0.342618	0.328065	0.388878	-0.373449	-0.512766	-0.2354	-0.212752	-0.29699	-0.344606	-0.366656	-0.324963	0.40353	-0.185263	0.383131	0.341836	-0.429314	-0.345026	-0.405502	0.514129	0.175923	0.262949	0.382194	-0.309073
KEGG_NON_HOMOLOGOUS_END_JOINING	0.414522	0.34697	0.407457	-0.289069	0.453265	-0.229808	-0.509123	0.183766	0.221123	0.418283	-0.394154	-0.287094	-0.401858	-0.280802	-0.234018	-0.332585	-0.60764	0.289098	0.227131	-0.414829	-0.376878	0.437852	0.189787	-0.153612	0.576322	-0.286648	-0.450967	0.511017	-0.256503	-0.315252	-0.387706	-0.228484	-0.47655	0.341415	-0.41212	-0.235468	0.216729	0.343632	-0.37437	0.230942	-0.35016	-0.510642	-0.328705	0.436973	0.306343	-0.453692	0.489564	0.316081	-0.394394
KEGG_MAPK_SIGNALING_PATHWAY	-0.221201	0.228721	0.193525	-0.239788	0.197895	-0.314994	-0.135957	0.229298	0.235811	-0.206726	-0.247321	-0.198567	0.280972	0.194412	0.367352	0.323424	0.137315	0.268483	0.28496	-0.16061	-0.159103	0.160598	-0.195805	0.215981	-0.236057	-0.178417	-0.175507	-0.29356	-0.244049	-0.164797	0.296235	0.203966	-0.249408	0.150206	-0.261448	0.216105	0.258158	-0.256174	-0.208681	-0.219707	-0.190871	0.212305	0.162326	-0.131983	-0.291358	0.270421	-0.225434	-0.321503	-0.152874
KEGG_ERBB_SIGNALING_PATHWAY	-0.204725	0.354899	0.269643	-0.396203	-0.243648	-0.369607	-0.157278	0.213976	-0.198464	0.131131	-0.321931	-0.264537	0.383546	0.251413	0.291181	0.254047	-0.12409	-0.191572	-0.192176	-0.218389	-0.305348	0.277307	-0.206049	0.179063	-0.200185	-0.393024	-0.149018	-0.197057	-0.416329	0.173413	0.191361	0.294916	-0.167405	-0.310704	-0.339896	-0.174815	-0.220498	-0.346194	-0.28306	0.189621	-0.226461	-0.248657	-0.286681	-0.229815	-0.427343	0.229485	-0.255163	-0.379996	-0.308474
KEGG_CALCIUM_SIGNALING_PATHWAY	0.143551	0.298732	0.155795	-0.374407	0.284356	-0.322599	-0.197024	0.249452	-0.234573	-0.307914	0.122169	-0.277144	0.253738	0.239813	0.300987	0.215086	0.311045	0.26337	-0.233921	0.116462	0.231044	0.213442	0.174655	-0.124477	-0.296302	-0.202521	-0.255873	-0.256208	-0.263471	0.343976	0.229145	0.22325	0.240901	-0.251556	0.27735	0.241318	-0.176049	-0.203607	0.121142	-0.237548	0.2335	0.201321	0.180933	-0.184943	-0.342106	0.215839	-0.281961	-0.183268	-0.136671
KEGG_CYTOKINE_CYTOKINE_RECEPTOR_INTERACTION	-0.288079	-0.534841	-0.266848	0.127957	-0.175415	-0.313895	0.420055	0.444144	0.455591	-0.538377	-0.192628	0.419444	0.193249	0.34553	0.567904	0.605513	0.221311	0.445221	0.420158	0.293113	-0.204508	-0.208875	0.233382	0.45883	-0.513947	0.341054	0.329886	-0.350773	0.25856	0.354822	0.456139	-0.169219	-0.206106	0.430549	-0.279766	0.460351	0.569974	-0.260163	-0.179577	-0.332973	-0.121013	0.379791	0.495332	0.276616	-0.284516	0.481079	-0.423233	-0.132226	0.118195
KEGG_CHEMOKINE_SIGNALING_PATHWAY	0.175306	-0.212604	0.1811	-0.319432	-0.194509	-0.487017	0.136914	0.41249	0.236888	-0.299569	-0.318736	-0.168302	0.232743	0.277897	0.507121	0.382088	0.14073	0.314768	0.293202	-0.192033	-0.267199	0.190989	-0.156154	0.225673	-0.325417	-0.251953	-0.174394	0.162349	-0.29767	0.296679	0.311135	0.270795	-0.222573	-0.163537	-0.337271	0.354044	0.318002	-0.409045	-0.31957	-0.186661	-0.240202	0.249013	0.237069	-0.198488	-0.391851	0.340102	-0.231957	-0.335937	-0.217714
KEGG_PHOSPHATIDYLINOSITOL_SIGNALING_SYSTEM	0.258689	0.397207	0.212946	-0.400958	0.268799	-0.450808	-0.471278	0.266823	-0.20967	-0.236875	-0.254166	-0.221138	0.389077	0.208551	0.403557	0.170111	0.311364	0.226383	-0.289858	-0.231473	0.170319	0.233726	0.320006	-0.191462	-0.255947	-0.245507	-0.133169	0.212585	-0.403259	0.383797	0.202767	-0.199052	0.236488	-0.266739	0.174834	0.155061	-0.212463	-0.32374	0.161298	-0.39814	0.184619	0.259927	-0.304163	-0.262095	-0.447688	-0.211348	-0.348712	-0.244272	-0.187658
KEGG_NEUROACTIVE_LIGAND_RECEPTOR_INTERACTION	-0.341066	0.31966	0.234411	-0.200584	-0.225044	-0.284804	0.3285	0.306248	-0.241503	-0.279025	0.177558	-0.348667	0.276755	0.307068	0.288585	0.287228	-0.247021	0.374641	-0.308781	0.211806	0.128357	0.212733	-0.343115	-0.231903	-0.323684	-0.252977	-0.252851	-0.22132	0.145972	0.249663	0.246721	0.262337	-0.200026	-0.315796	0.22146	0.213848	0.271909	-0.318629	0.116334	-0.189267	-0.178894	0.236807	0.253227	0.286894	-0.26136	0.223863	-0.287282	-0.185375	0.149649
KEGG_CELL_CYCLE	0.375842	0.277278	0.203594	0.142955	0.208756	0.165672	-0.128271	-0.146367	0.265626	0.404693	-0.469044	-0.248319	-0.341247	0.404885	-0.487583	-0.400672	-0.203787	-0.348355	-0.186285	-0.385804	-0.189918	-0.152448	0.242511	-0.260151	0.450153	-0.150801	-0.27871	0.263553	-0.26299	-0.474285	-0.395447	0.224982	-0.402483	-0.251296	-0.484047	-0.403525	-0.156881	0.267588	-0.348358	0.302728	-0.357147	-0.409314	-0.26295	-0.220262	0.345163	-0.151258	0.274223	0.168107	-0.327244
KEGG_OOCYTE_MEIOSIS	0.227808	0.441701	0.226144	-0.226336	0.32239	-0.19119	-0.200635	0.174012	-0.166097	-0.167182	-0.346036	-0.431554	-0.205721	0.305126	-0.339616	-0.341158	-0.162902	-0.24156	-0.199005	-0.338847	-0.250802	0.193665	0.159025	-0.200917	0.249692	-0.286998	-0.289428	0.15335	-0.367969	-0.296579	-0.301575	0.269392	-0.269946	-0.313552	-0.331111	-0.223493	-0.208052	-0.317397	-0.332866	0.17317	-0.342538	-0.263133	-0.355634	-0.13621	-0.196588	-0.127457	0.244691	-0.386613	-0.175258
KEGG_P53_SIGNALING_PATHWAY	-0.236698	-0.309829	0.231403	0.284795	-0.154638	0.123961	0.256236	-0.170955	0.242778	-0.217436	-0.296783	0.465995	-0.201712	-0.217687	0.218971	0.208035	-0.206941	0.246538	-0.139319	-0.245399	-0.119396	0.164374	0.201	0.385054	-0.196526	0.200836	-0.193473	-0.242153	-0.24969	-0.27716	0.28004	0.268297	-0.367175	0.201766	-0.421055	-0.354399	0.267168	0.163738	-0.279251	0.194047	-0.218846	0.154378	0.364583	0.364109	0.346088	0.372869	-0.304641	-0.215625	-0.274149
KEGG_UBIQUITIN_MEDIATED_PROTEOLYSIS	0.206483	0.281638	-0.146584	-0.209739	0.218151	0.180417	-0.222482	-0.307235	-0.151263	0.266243	-0.221994	-0.222079	-0.157591	0.154574	-0.211535	-0.318732	-0.280127	-0.18458	0.181956	-0.315642	-0.265152	-0.183869	-0.127481	0.132595	0.315596	-0.227432	0.183483	0.254898	-0.321116	-0.253797	-0.205697	0.214401	-0.227855	-0.235069	-0.336988	-0.127309	-0.17046	-0.218727	-0.263692	0.182394	-0.255565	-0.316673	-0.272575	-0.256149	0.26651	-0.146523	0.186332	0.172751	-0.220277
KEGG_SNARE_INTERACTIONS_IN_VESICULAR_TRANSPORT	0.184075	-0.330577	0.31755	0.404862	0.279702	0.338273	-0.213471	-0.198419	-0.272315	-0.239937	0.369841	-0.239334	-0.386539	-0.236934	0.228834	0.25035	-0.276341	0.252499	0.251434	-0.228505	-0.231455	-0.380193	0.194806	0.425126	-0.188575	-0.243495	0.288332	0.197742	-0.235552	0.247506	0.245741	-0.300436	-0.279159	0.363708	0.16003	0.347256	0.284975	0.156607	0.145887	-0.302225	0.206099	0.267275	0.181281	-0.290269	-0.305259	0.383517	-0.262462	0.208989	0.245744
KEGG_REGULATION_OF_AUTOPHAGY	-0.362976	-0.202571	0.269915	-0.311664	-0.265376	0.40926	-0.285963	-0.304342	-0.321347	-0.250722	0.524781	-0.288706	-0.162705	-0.33731	0.280009	-0.23581	-0.294564	0.273894	0.177525	-0.378783	-0.370183	-0.239157	0.28345	-0.259965	0.22481	-0.274955	0.152606	-0.245302	0.306261	0.276555	0.294382	-0.430108	0.17443	0.382896	-0.308747	0.45723	0.18577	-0.358968	-0.288928	-0.389415	-0.178959	0.333485	-0.23185	0.393363	0.246801	0.152945	0.421359	-0.439426	-0.208564
KEGG_LYSOSOME	0.265213	-0.4194	-0.190721	0.249393	-0.196829	-0.331882	-0.210095	0.390309	0.369397	-0.449248	-0.23043	0.463876	0.108711	-0.189063	0.57289	0.510432	-0.174589	0.381254	0.460633	0.340972	-0.338438	-0.191644	-0.190393	0.376479	-0.456229	0.188727	0.245193	-0.424152	0.189715	0.33692	0.480607	0.148972	-0.214756	0.368041	-0.319211	0.540381	0.436906	-0.274916	-0.238131	-0.441029	-0.116585	0.536102	0.494512	0.428844	-0.370221	0.501119	-0.243302	-0.327327	0.194889
KEGG_ENDOCYTOSIS	0.145649	0.207363	0.228103	-0.319855	0.211303	-0.280879	-0.219477	0.218801	0.208424	-0.278641	-0.219252	-0.145377	0.194862	0.201511	0.367479	0.293638	0.214465	0.181108	0.225619	-0.114148	-0.286383	-0.169738	-0.240629	0.257927	-0.231335	-0.287691	-0.134652	-0.196113	-0.292237	0.195087	0.266061	0.184398	-0.213072	-0.171645	-0.180224	0.159941	0.207139	-0.27189	-0.220303	-0.18622	0.125724	0.15925	0.160122	-0.20261	-0.334853	0.178058	-0.262471	-0.282786	-0.15773
KEGG_PEROXISOME	-0.185322	-0.445567	0.190869	0.228959	-0.274411	0.399152	0.204349	0.244906	-0.374177	-0.283204	0.525986	-0.111027	-0.136207	-0.24514	0.199908	-0.155375	0.32409	0.217723	-0.350982	0.231174	-0.145298	0.301383	0.196396	-0.29301	0.237355	0.220233	0.265194	0.205677	0.406122	0.490892	0.232651	-0.28975	0.517385	0.280648	0.3749	0.414191	-0.261536	0.191396	0.242823	0.278157	0.349849	0.411004	0.250492	0.285185	0.240176	0.16379	0.351392	0.249951	0.290509
KEGG_MTOR_SIGNALING_PATHWAY	-0.185363	0.295818	0.262542	-0.17397	-0.219962	-0.301824	-0.311714	0.209243	0.32497	-0.256342	-0.246424	-0.139151	0.294394	-0.20183	0.411143	0.296344	-0.236255	0.226903	0.214541	-0.358982	-0.299193	-0.194287	0.366297	0.311684	0.207777	-0.332115	-0.174311	-0.14034	-0.444701	0.280041	0.242461	0.169579	-0.305964	-0.28598	-0.444137	-0.195448	-0.232233	-0.364106	-0.38812	-0.303074	-0.361974	-0.263808	-0.283026	-0.216899	-0.47984	-0.150595	-0.295224	-0.417822	-0.395496
KEGG_APOPTOSIS	-0.303569	-0.368479	-0.294784	0.168786	0.183752	-0.188882	0.265291	0.266154	0.276871	-0.443259	0.0970083	0.350483	0.150539	0.23179	0.469092	0.423132	-0.174721	0.216385	0.230467	-0.200864	-0.287442	-0.170104	0.122413	0.416732	-0.368203	0.272159	0.293687	0.168862	-0.161325	0.292169	0.39259	-0.187336	-0.145016	0.288577	-0.246305	0.391091	0.450183	-0.274687	-0.202955	-0.277266	0.239011	-0.150189	0.359404	0.241831	-0.3138	0.430217	-0.346322	-0.225191	-0.149885
KEGG_CARDIAC_MUSCLE_CONTRACTION	-0.293582	0.419474	-0.190741	0.302703	0.487396	0.323193	0.408851	-0.282167	-0.241238	-0.315163	0.265859	-0.280252	-0.260198	-0.242729	-0.389413	-0.22137	-0.164309	0.171068	-0.381793	0.303625	0.209071	0.185709	-0.291377	-0.24449	-0.24467	-0.222435	-0.349615	-0.384446	0.18968	0.244004	-0.27029	-0.2039	0.363282	-0.364598	0.242034	-0.322402	-0.210914	-0.198716	-0.191327	-0.242975	0.254727	-0.144241	-0.164922	0.202452	0.364279	0.288579	0.257626	-0.200199	0.474288
KEGG_VASCULAR_SMOOTH_MUSCLE_CONTRACTION	0.212491	0.303352	0.209715	-0.434732	0.254195	-0.401122	-0.265627	0.318436	0.220686	-0.324556	-0.260328	-0.207039	0.339252	0.238123	0.384593	0.234617	0.291452	0.275694	0.177288	-0.224225	-0.21969	0.170314	0.203088	-0.177473	-0.357365	-0.238577	0.160365	-0.349712	-0.335097	0.312951	0.255457	-0.196313	-0.221018	-0.283164	-0.139501	0.171613	0.18419	-0.282106	-0.240787	-0.206669	0.200344	0.183056	-0.198974	0.158647	-0.401406	0.162537	-0.327623	-0.301827	-0.183102
KEGG_WNT_SIGNALING_PATHWAY	0.164338	0.346284	0.201956	-0.412029	0.200253	-0.346104	-0.193824	0.187894	0.237075	0.214333	-0.315831	-0.272813	0.315988	0.17133	0.19151	-0.172712	0.303985	0.165449	0.191611	-0.305348	-0.222027	0.195833	0.173396	-0.212964	0.212765	-0.41025	-0.191375	0.157804	-0.458854	0.184414	-0.178131	0.244613	0.182968	-0.374412	-0.257171	-0.244652	-0.261159	-0.33016	-0.272977	-0.164294	-0.20523	-0.218476	-0.312886	-0.268156	-0.394677	-0.229355	0.173214	-0.294304	-0.254294
KEGG_DORSO_VENTRAL_AXIS_FORMATION	0.284326	0.454956	0.306451	-0.497485	-0.273534	-0.54364	-0.222509	0.401225	0.233647	-0.194171	-0.449216	-0.312306	0.536649	0.471802	0.51996	0.332527	0.515518	-0.189457	0.24467	-0.331662	-0.338072	0.307673	0.468066	0.245674	-0.304549	-0.382144	0.260749	-0.151527	-0.524409	0.256639	0.298367	0.255996	-0.289622	-0.441159	-0.439071	0.203658	0.253482	-0.529255	-0.459661	0.25877	-0.347069	-0.248269	-0.324466	-0.398485	-0.502554	0.151082	0.15006	-0.367432	-0.48999
KEGG_NOTCH_SIGNALING_PATHWAY	0.1597	0.306609	-0.210428	-0.410116	-0.286352	-0.516757	0.189086	0.582565	0.270287	0.446387	-0.456872	-0.298119	0.241568	0.332312	0.288854	-0.152733	0.344544	-0.33246	0.310218	-0.258804	0.305951	-0.1598	0.426865	-0.222795	0.335798	-0.382111	0.224224	-0.206371	-0.349136	-0.276194	0.24022	0.30781	-0.239671	-0.344273	-0.292377	-0.339613	-0.231543	-0.205974	0.177711	0.353703	-0.383119	-0.225074	-0.187479	-0.377459	-0.469368	-0.220522	-0.226877	0.226672	-0.448798
KEGG_HEDGEHOG_SIGNALING_PATHWAY	-0.274918	0.336857	-0.287438	-0.460513	-0.336878	-0.439828	-0.222169	0.246875	0.319653	0.403116	-0.329664	-0.256374	0.476375	0.297103	-0.19288	-0.318503	0.391767	-0.261396	0.252314	-0.31648	-0.187659	0.227491	0.285117	-0.149682	0.33345	-0.346125	-0.250312	0.243161	-0.416669	-0.258143	0.212791	0.328442	0.283254	-0.287612	-0.333426	-0.308615	-0.257117	-0.406722	-0.377367	-0.214659	-0.223367	-0.312635	-0.400523	-0.312586	-0.298457	-0.275959	-0.265734	-0.304189	-0.585415
KEGG_TGF_BETA_SIGNALING_PATHWAY	0.169933	0.148802	-0.259729	-0.338212	-0.178485	-0.226369	-0.246152	0.159743	0.390148	0.227511	-0.372297	0.283258	0.389741	-0.25083	0.335437	0.197829	0.220113	0.234462	0.380863	-0.34161	-0.36935	0.199364	0.288815	0.274497	-0.239717	-0.19243	0.381069	0.159632	-0.353391	-0.229158	-0.229036	-0.161176	-0.244639	-0.188848	-0.365073	-0.148205	0.268652	-0.361744	-0.38287	-0.332057	-0.36862	-0.174679	-0.257815	-0.225546	-0.39794	0.248916	-0.269424	-0.347693	-0.449574
KEGG_AXON_GUIDANCE	-0.193209	0.381485	0.332465	-0.357474	0.269134	-0.455843	-0.221689	0.343003	0.266646	-0.142893	-0.420926	-0.197309	0.323632	-0.134005	0.295937	0.242639	0.21348	0.254723	0.204398	-0.165248	-0.221996	0.164002	-0.191642	0.166529	-0.176867	-0.328479	-0.165205	-0.252571	-0.397816	-0.207384	0.184979	0.315494	-0.188519	-0.270326	-0.25104	-0.168499	0.190073	-0.313138	-0.294734	-0.148863	-0.255195	0.186855	-0.23008	-0.139998	-0.40748	0.179633	-0.238375	-0.256137	-0.158523
KEGG_VEGF_SIGNALING_PATHWAY	-0.256614	0.204654	0.191261	-0.219736	-0.210613	-0.341732	0.172025	0.325561	0.308645	-0.303489	-0.254437	-0.19226	0.281519	0.226812	0.371336	-0.193995	0.222024	0.241196	0.267559	-0.258775	-0.26799	0.264764	-0.154377	0.305507	-0.189293	-0.228402	0.252355	-0.272324	-0.296941	0.232959	0.307248	0.241739	-0.232897	-0.175833	-0.305764	0.227964	0.253187	-0.314607	-0.304494	-0.212943	-0.177724	-0.187012	-0.276437	-0.204095	-0.442316	0.249875	-0.182571	-0.350475	-0.229139
KEGG_FOCAL_ADHESION	0.237525	-0.192172	-0.138998	-0.269873	0.316517	-0.464104	0.122988	0.337752	0.427151	-0.408683	-0.461416	0.2941	0.365709	0.291163	0.401993	0.233318	0.35853	0.28685	0.320197	-0.139993	-0.219363	0.260938	0.279544	0.301466	-0.376233	0.241107	0.344734	-0.369372	-0.264277	-0.171191	0.251181	0.282324	-0.166091	-0.147672	-0.346865	0.16362	0.445102	-0.261587	-0.287923	0.14666	-0.186956	-0.19681	0.195658	0.182889	-0.351844	0.447612	-0.45031	-0.333801	-0.263551
KEGG_ECM_RECEPTOR_INTERACTION	0.306358	-0.346964	-0.339727	-0.207173	0.500294	-0.525337	0.14059	0.344169	0.577312	-0.509124	-0.610412	0.474342	0.456226	0.388227	0.461259	0.149854	0.502146	0.37441	0.50882	0.224463	-0.149656	0.255107	0.387998	0.435546	-0.56257	0.556955	0.507045	-0.46986	0.265661	-0.308562	0.350551	0.223602	-0.232429	0.265945	-0.280471	0.258059	0.618789	0.162208	-0.274013	-0.127977	0.201022	-0.163681	0.395545	0.389302	-0.283353	0.558472	-0.587107	-0.323082	-0.302535
KEGG_CELL_ADHESION_MOLECULES_CAMS	0.176034	-0.288305	0.221098	-0.183735	-0.27746	-0.499495	-0.140254	0.438364	-0.203497	-0.414396	-0.359721	0.19548	0.302533	0.348622	0.557702	0.492493	0.207435	0.454529	0.311544	0.201456	-0.239091	-0.187665	0.167366	0.340029	-0.556544	0.220735	-0.182476	-0.273519	-0.195286	0.414198	0.3431	0.208127	0.183119	0.311807	-0.25341	0.377478	0.362223	-0.352395	-0.26433	-0.369002	-0.112427	0.411848	0.362533	0.335198	-0.318135	0.386309	-0.252684	-0.205532	-0.136689
KEGG_ADHERENS_JUNCTION	0.293211	0.235422	0.26	-0.415742	0.205412	-0.455677	-0.296982	0.403556	0.257284	-0.209138	-0.51988	0.213639	0.439893	0.286008	0.32548	0.223544	0.395393	0.399776	0.250691	-0.266311	-0.298977	0.216572	0.319779	0.169331	-0.21459	-0.318253	0.304698	-0.180329	-0.509482	0.274706	0.269117	0.344914	0.237714	-0.357983	-0.399127	0.257464	-0.269161	-0.431174	-0.392904	-0.261575	-0.193089	0.153293	-0.411739	-0.248333	-0.503474	0.220106	-0.307319	-0.413876	-0.336437
KEGG_TIGHT_JUNCTION	0.264063	0.299834	0.431447	-0.366176	-0.153007	-0.430895	-0.29184	0.287751	-0.192834	0.180484	-0.348911	-0.177601	0.292401	-0.117195	0.240418	-0.229065	0.379411	0.178429	-0.313597	-0.295227	-0.246479	0.193222	0.261034	-0.251584	-0.20467	-0.274532	-0.144778	-0.168411	-0.374044	0.185759	-0.280616	-0.207385	0.282805	-0.389288	-0.185714	0.207698	-0.212618	-0.244415	-0.228004	0.219955	0.206536	0.239769	-0.370486	-0.266234	-0.377311	-0.149056	-0.196746	-0.297265	-0.259801
KEGG_GAP_JUNCTION	0.231718	0.41709	0.192448	-0.441177	0.192329	-0.441755	0.176485	0.410614	0.171403	-0.258489	-0.35905	-0.247142	0.309753	0.276382	0.300838	0.196316	0.349814	0.154771	-0.152427	-0.212438	-0.254634	0.33939	0.275639	0.157778	-0.220577	-0.341495	0.179314	-0.231716	-0.343174	0.221279	0.25627	0.32	0.189208	-0.328903	-0.329154	0.193331	-0.171277	-0.335922	-0.396261	-0.16054	-0.270803	-0.157275	-0.411337	-0.29264	-0.329634	0.16886	-0.27584	-0.429142	-0.301104
KEGG_COMPLEMENT_AND_COAGULATION_CASCADES	-0.191329	-0.6399	-0.273924	0.369292	0.251542	-0.36877	0.434513	0.457691	0.549123	-0.64978	-0.450191	0.607411	0.215761	0.262522	0.60488	0.616658	-0.284746	0.686844	0.621536	0.308388	-0.337458	-0.239186	0.269557	0.555185	-0.574439	0.496168	0.420271	-0.449331	0.329196	0.339894	0.525336	-0.201639	-0.291497	0.594328	-0.47008	0.560211	0.579621	-0.258128	-0.285162	-0.566893	-0.212337	0.62591	0.630794	0.523452	-0.315916	0.660269	-0.408983	-0.241484	0.140383
KEGG_ANTIGEN_PROCESSING_AND_PRESENTATION	0.374644	-0.420255	0.239821	0.170728	-0.235252	-0.419083	0.141903	0.58965	0.42055	-0.486587	-0.426236	0.321043	-0.313276	0.456388	0.58649	0.509574	-0.25742	0.482927	0.571415	-0.210422	-0.418118	-0.332398	0.229771	0.407548	-0.541221	0.238761	0.178486	0.212367	-0.342563	0.448879	0.277855	-0.249987	-0.150511	0.476255	-0.335051	0.599442	0.231899	-0.269491	-0.238597	-0.39318	-0.199415	0.529318	0.489317	0.422238	0.18888	0.373577	-0.223702	-0.243975	-0.305232
KEGG_RENIN_ANGIOTENSIN_SYSTEM	-0.554226	-0.517591	0.415283	-0.723043	-0.589024	0.265495	-0.316754	-0.311892	0.483337	-0.436835	-0.420129	0.54387	0.548088	0.718323	0.363167	-0.500173	0.314263	-0.435811	-0.323708	0.583736	0.272472	0.37096	-0.523658	-0.347668	-0.274917	-0.332069	0.348459	-0.5041	-0.281508	0.529216	-0.367948	-0.385323	0.715086	-0.344734	0.448212	0.668791	-0.476079	0.54453	0.356015	0.366136	0.760798	0.331096	0.409212	-0.344066	-0.309206	0.280727	-0.534212	0.62665	-0.296777
KEGG_TOLL_LIKE_RECEPTOR_SIGNALING_PATHWAY	-0.279412	-0.356007	-0.222118	0.212534	-0.191323	-0.296848	0.129165	0.346891	0.374721	-0.509779	0.134929	0.269151	0.15418	0.231488	0.568177	0.462569	-0.286852	0.373059	0.35846	-0.188537	-0.319559	0.20596	-0.190401	0.406945	-0.462099	0.304086	0.269755	0.161806	-0.188684	0.304049	0.480584	-0.174685	-0.247997	0.444868	-0.32011	0.425405	0.464408	-0.331783	-0.298364	-0.378393	-0.178326	0.169317	0.316845	0.237288	-0.380288	0.440212	-0.279042	-0.303438	-0.172489
KEGG_NOD_LIKE_RECEPTOR_SIGNALING_PATHWAY	-0.339052	-0.425172	-0.283104	0.274032	-0.159605	-0.19642	0.221447	0.368557	0.374439	-0.594575	0.141246	0.29516	0.237456	0.223979	0.520172	0.494	-0.293777	0.372939	0.38572	-0.203207	-0.333146	-0.172921	-0.22686	0.403435	-0.521304	0.43151	0.321693	-0.18143	0.211819	0.234022	0.429127	-0.189459	-0.274268	0.475357	-0.245376	0.504487	0.516007	-0.20453	-0.245654	-0.40358	-0.186767	0.373637	0.376622	0.25723	-0.428448	0.397156	-0.278661	-0.241128	0.223687
KEGG_RIG_I_LIKE_RECEPTOR_SIGNALING_PATHWAY	-0.258613	-0.376202	-0.253466	0.241532	-0.178355	0.194199	-0.178814	-0.263222	0.345065	-0.510122	0.304067	0.121553	-0.206238	0.303958	0.474424	0.379549	-0.218627	-0.161463	0.373943	-0.204188	-0.241885	-0.184857	-0.182341	0.37464	-0.45708	0.376743	0.174818	0.323227	0.315547	0.31296	0.338295	-0.266905	-0.170966	0.435024	0.189928	0.426786	0.449329	0.25167	0.184355	-0.279875	0.200443	0.248717	0.319499	0.266013	-0.26755	0.30366	-0.224689	0.288781	-0.159649
KEGG_CYTOSOLIC_DNA_SENSING_PATHWAY	-0.146368	-0.509356	-0.295497	0.427766	0.192794	0.250511	0.150412	0.314312	0.286157	-0.51985	0.310557	0.25851	-0.363068	0.173582	0.426138	0.479878	-0.325052	0.180175	0.363207	0.280398	0.166875	-0.234973	-0.383295	0.275443	-0.508074	0.41159	0.203172	0.462139	0.475021	0.279174	0.362249	-0.17582	-0.388122	0.368103	-0.225877	0.284646	0.529177	0.314017	0.281048	0.197933	0.278223	-0.262386	0.515605	0.265406	-0.186127	0.249406	-0.161083	0.352864	0.216755
KEGG_JAK_STAT_SIGNALING_PATHWAY	-0.23712	-0.371379	-0.200623	0.146031	-0.313226	-0.348597	0.213854	0.357247	0.404322	-0.31946	-0.410384	0.281202	0.217066	0.343805	0.587017	0.449823	0.124971	0.434931	0.408123	-0.200396	-0.30017	0.190912	0.250883	0.392954	-0.312	-0.233462	0.285797	-0.134877	-0.342592	0.389128	0.443937	0.223401	-0.177124	0.31436	-0.44761	0.362962	0.356847	-0.413317	-0.315229	-0.321603	-0.349028	0.320915	0.315224	0.238114	-0.398706	0.365401	-0.376044	-0.317573	-0.368432
KEGG_HEMATOPOIETIC_CELL_LINEAGE	-0.210045	-0.638326	-0.24478	0.272707	-0.303931	-0.305836	0.268846	0.627516	0.542743	-0.670597	-0.221267	0.450962	-0.226342	0.219036	0.659462	0.508847	0.246229	0.556281	0.450076	0.33779	-0.324448	-0.323805	0.324052	0.547044	-0.712859	0.546119	0.312706	-0.50529	0.315378	0.442126	0.554128	-0.372469	-0.19216	0.609597	-0.247355	0.619009	0.572675	-0.221236	-0.23209	-0.465892	0.165628	0.585347	0.547941	0.425576	-0.61043	0.586629	-0.495308	-0.20513	0.198603
KEGG_NATURAL_KILLER_CELL_MEDIATED_CYTOTOXICITY	-0.261736	-0.320813	-0.194379	-0.150877	0.257805	-0.404773	0.208993	0.324839	0.385696	-0.411455	-0.326497	0.160536	0.154785	0.352735	0.598663	0.465643	0.189583	0.392276	0.355543	-0.203695	-0.236842	-0.23993	0.201033	0.400985	-0.370706	0.222066	0.139735	-0.149658	-0.257306	0.378763	0.359279	0.185289	-0.228669	0.271848	-0.332908	0.412902	0.413	-0.32058	-0.279723	-0.258849	-0.213351	0.219571	0.339446	0.234267	-0.33876	0.454785	-0.281326	-0.256283	-0.200334
KEGG_T_CELL_RECEPTOR_SIGNALING_PATHWAY	-0.236901	0.196069	-0.187632	-0.205562	-0.190161	-0.387475	-0.138924	0.232849	0.34066	-0.277848	-0.278734	-0.154596	0.216115	0.229133	0.485031	0.394114	-0.204223	0.258203	0.313991	-0.243679	-0.268155	-0.17903	-0.171168	0.294025	-0.232785	0.177043	0.179365	0.141986	-0.324777	0.168415	0.358588	0.199184	-0.264525	0.215441	-0.327625	0.286732	0.300979	-0.278035	-0.289066	-0.176819	-0.219333	0.173515	0.275402	-0.145214	-0.487701	0.334486	-0.267482	-0.328592	-0.29844
KEGG_B_CELL_RECEPTOR_SIGNALING_PATHWAY	-0.208795	-0.269945	0.163228	-0.168093	-0.190353	-0.419579	-0.128309	0.36879	0.413777	-0.373967	-0.282686	0.201696	0.200237	0.153679	0.572825	0.47998	-0.191282	0.283347	0.348598	-0.23002	-0.306076	0.164544	-0.155437	0.385372	-0.289528	-0.176285	0.20073	0.197942	-0.257679	0.295693	0.340823	0.192841	-0.308082	0.268323	-0.374879	0.327049	0.366402	-0.324153	-0.305657	-0.259736	-0.212016	0.250511	0.3088	0.148815	-0.460117	0.391935	-0.228341	-0.330838	-0.256755
KEGG_FC_EPSILON_RI_SIGNALING_PATHWAY	-0.261845	0.334954	0.223281	-0.187499	-0.204389	-0.425296	-0.187157	0.321372	0.234693	-0.321279	-0.260392	-0.209599	0.182664	0.272424	0.432285	0.293265	0.146325	0.298971	0.277983	-0.310414	-0.303548	0.182986	-0.128033	0.256718	-0.240481	-0.309718	-0.276472	0.127761	-0.365516	0.31844	0.287471	0.244271	-0.214765	-0.192988	-0.348295	0.327955	0.247948	-0.417693	-0.37776	-0.266948	-0.367871	0.213412	-0.298779	-0.173278	-0.404535	0.213223	0.139025	-0.36562	-0.260671
KEGG_FC_GAMMA_R_MEDIATED_PHAGOCYTOSIS	-0.152859	-0.219923	0.264459	-0.180483	0.184318	-0.463469	0.154913	0.425223	0.297015	-0.303917	-0.326663	-0.177255	0.18878	0.295158	0.42802	0.408914	-0.259598	0.401609	0.311007	-0.162022	-0.291039	-0.152674	-0.141482	0.307121	-0.299304	-0.251465	0.0961408	-0.107994	-0.247062	0.329322	0.322267	0.253463	-0.309054	0.237083	-0.34052	0.391153	0.360034	-0.406035	-0.311088	-0.282682	-0.219773	0.312482	0.253228	0.202173	-0.375753	0.364578	-0.217734	-0.320401	-0.204616
KEGG_LEUKOCYTE_TRANSENDOTHELIAL_MIGRATION	0.224113	-0.304078	0.213469	-0.22288	0.188229	-0.491473	-0.159256	0.429082	0.382096	-0.423479	-0.397204	0.210988	0.231605	0.256622	0.531009	0.371833	0.267881	0.452211	0.356947	0.234008	-0.263634	-0.192186	0.218892	0.364309	-0.428181	0.225882	0.268231	-0.364129	-0.228689	0.300786	0.378508	0.196851	-0.172953	0.26191	-0.324292	0.457344	0.448663	-0.297184	-0.289585	-0.169916	-0.14377	0.334562	0.295912	0.186205	-0.463078	0.464457	-0.274523	-0.304029	-0.157749
KEGG_INTESTINAL_IMMUNE_NETWORK_FOR_IGA_PRODUCTION	-0.149472	-0.696363	-0.211422	-0.176524	-0.41964	-0.473279	0.495421	0.743154	0.475123	-0.722187	0.389632	0.397345	-0.477324	0.408626	0.819987	0.828828	-0.459568	0.676019	0.742855	0.590875	-0.218225	-0.430466	-0.364594	0.492517	-0.710701	0.341135	-0.307517	-0.430396	0.260125	0.568181	0.705151	-0.424368	-0.41802	0.708138	-0.340557	0.706568	0.619991	0.200733	0.354102	-0.499473	0.309544	0.695203	0.801839	0.509408	-0.547326	0.365735	-0.478334	-0.20139	0.469378
KEGG_CIRCADIAN_RHYTHM_MAMMAL	-0.46551	0.379071	-0.372995	0.266238	0.338927	-0.427617	-0.505838	-0.319737	0.447682	0.36341	-0.432421	-0.408059	0.566568	0.313843	-0.333051	-0.25453	-0.186045	-0.281592	0.33526	-0.23706	0.521594	0.264641	0.627598	0.343032	0.539133	0.275687	0.321719	0.344791	-0.576226	0.349414	0.327494	0.402898	0.499955	-0.214759	-0.242301	-0.243955	-0.645463	-0.50843	-0.630141	-0.360167	-0.439022	0.405718	-0.575399	-0.322723	-0.338343	-0.377223	-0.40851	-0.439799	-0.512838
KEGG_LONG_TERM_POTENTIATION	-0.203986	0.405682	0.298783	-0.302137	0.288502	-0.309692	0.173576	-0.239022	0.192048	-0.312841	-0.302221	-0.356774	0.35034	0.301347	0.337249	0.242467	0.185092	0.329182	-0.212174	-0.283506	-0.285788	0.293621	-0.191111	0.157081	0.212762	-0.332416	-0.219923	-0.252188	-0.430157	0.225696	-0.184735	0.32329	-0.173659	-0.374153	-0.250575	-0.225747	-0.174025	-0.347682	-0.326797	-0.176367	-0.146293	-0.195949	-0.348457	-0.156552	-0.405003	0.185253	-0.276647	-0.372065	0.184289
KEGG_NEUROTROPHIN_SIGNALING_PATHWAY	0.196223	0.298681	0.309421	-0.250699	-0.190786	-0.402718	0.124949	0.349342	0.173831	-0.22054	-0.42946	-0.197785	0.311671	0.301216	0.344618	0.290785	0.145614	0.23565	0.162784	-0.194492	-0.332065	0.250053	-0.151427	0.240249	-0.222429	-0.316567	0.200115	-0.144138	-0.393396	0.176905	0.274492	0.280538	-0.205785	-0.242232	-0.366438	0.20063	0.196155	-0.40284	-0.37571	-0.163416	-0.244766	0.17207	-0.275655	-0.203855	-0.363043	0.246057	-0.164208	-0.401969	-0.280622
KEGG_LONG_TERM_DEPRESSION	0.25614	0.407451	0.358873	-0.338324	-0.1689	-0.424069	-0.185095	0.334122	-0.221476	-0.189012	-0.335429	-0.326924	0.367409	0.230768	0.296678	0.215554	0.283124	0.29165	-0.308889	-0.282739	-0.35842	0.357547	-0.206287	0.221418	-0.314229	-0.296094	0.208345	-0.146907	-0.372229	0.293493	-0.159174	-0.190894	0.325543	-0.323167	-0.281857	0.215346	-0.187907	-0.368762	-0.35579	-0.286193	-0.37082	0.29815	-0.401651	-0.190167	-0.329531	0.166097	-0.195301	-0.407602	-0.193104
KEGG_OLFACTORY_TRANSDUCTION	-0.233712	0.599749	0.385783	-0.58199	0.302731	-0.489208	-0.426896	0.287097	-0.492946	-0.281472	-0.187218	-0.357888	0.420607	0.255562	0.449398	0.309659	0.419017	0.267446	-0.151055	-0.186328	-0.280576	0.303612	0.299515	-0.426893	-0.228794	-0.528703	-0.415312	0.217732	-0.483505	0.522437	0.386134	0.370143	0.270288	-0.50729	0.215065	0.296677	-0.335897	-0.577734	-0.445542	-0.432928	-0.358204	0.375145	-0.410928	0.400728	-0.557025	-0.186474	-0.399906	-0.563258	0.253482
KEGG_TASTE_TRANSDUCTION	-0.253087	0.53863	0.300866	-0.534008	0.216587	-0.60047	0.267306	0.389623	0.26359	-0.401567	-0.499296	-0.28658	0.306511	0.357137	0.341082	0.370033	0.484129	0.423033	0.184026	0.289547	0.271861	0.292784	0.256375	-0.357262	-0.453063	-0.608894	-0.385399	-0.55367	-0.569869	0.23593	0.384147	0.292587	0.234998	-0.355165	-0.228232	0.368441	-0.401501	-0.397145	-0.280801	-0.276883	-0.268679	-0.191526	-0.44051	-0.235061	-0.546104	-0.270733	-0.520117	-0.477438	-0.344816
KEGG_REGULATION_OF_ACTIN_CYTOSKELETON	0.306165	-0.229305	0.15433	-0.251805	0.250209	-0.410057	-0.182915	0.401781	0.277657	-0.27518	-0.425938	0.169083	0.333452	0.256788	0.348385	0.259006	0.244778	0.319363	0.237592	-0.160834	-0.190979	0.231541	0.213783	0.241542	-0.270546	-0.191703	0.254345	-0.233507	-0.288618	0.237373	0.229454	0.271429	-0.162776	-0.160687	-0.283154	0.260209	0.315496	-0.317605	-0.269165	-0.156362	0.171662	0.245656	0.185783	0.19179	-0.359477	0.413504	-0.346535	-0.289974	-0.200649
KEGG_INSULIN_SIGNALING_PATHWAY	0.230586	0.214261	0.223132	-0.230744	-0.214535	-0.249649	-0.212168	0.20094	0.197913	-0.15648	-0.279055	-0.234682	0.330851	0.146685	0.331558	0.239122	0.190663	0.179383	-0.239402	-0.244943	-0.182121	0.244085	0.216035	0.234191	0.144521	-0.282432	0.211909	-0.0955518	-0.309454	0.233274	0.182438	0.226683	0.230081	-0.181564	-0.293098	0.168618	-0.185805	-0.331199	-0.241416	0.192916	0.192202	-0.185618	-0.250482	-0.231384	-0.358987	0.158164	-0.278266	-0.287398	-0.272476
KEGG_GNRH_SIGNALING_PATHWAY	-0.230633	0.426979	0.154012	-0.369967	0.273116	-0.406381	-0.137416	0.223649	0.264486	-0.205511	-0.302428	-0.228578	0.282733	0.259208	0.358788	0.24299	0.220885	0.238696	0.262294	-0.200621	-0.188553	0.22611	-0.186924	0.184099	-0.264622	-0.324975	-0.246585	-0.259338	-0.372195	0.235946	0.291957	0.251182	-0.137705	-0.30158	-0.233857	0.264676	-0.219285	-0.28422	-0.288598	-0.22509	-0.208316	0.141497	-0.257749	-0.209466	-0.404582	-0.144093	-0.241686	-0.388931	-0.244521
KEGG_PROGESTERONE_MEDIATED_OOCYTE_MATURATION	-0.17395	0.419078	0.214814	-0.202796	0.247223	-0.249601	-0.186135	0.24862	0.301441	0.160965	-0.288925	-0.387784	-0.257713	0.225809	-0.279382	-0.322123	-0.20403	-0.283073	-0.13316	-0.382178	-0.215183	-0.16018	0.267039	-0.10452	0.2531	-0.252587	-0.303695	-0.13526	-0.315274	-0.274106	-0.199626	0.196261	-0.282934	-0.212922	-0.343586	-0.257823	-0.138288	-0.330033	-0.346795	-0.20627	-0.441848	-0.299107	-0.394008	-0.153191	-0.27392	-0.123833	0.268188	-0.365952	-0.258734
KEGG_MELANOGENESIS	0.162029	0.390643	-0.173051	-0.407037	0.196403	-0.44645	-0.205214	0.252287	0.223536	0.172855	-0.318718	-0.254534	0.314904	0.235567	0.288095	0.19781	0.289278	0.189554	-0.191107	-0.226198	-0.186877	0.161543	0.236135	0.188348	-0.187517	-0.375764	-0.198715	-0.124324	-0.415178	0.222948	0.151077	0.293333	0.172367	-0.399936	-0.248308	-0.206476	-0.23066	-0.344758	-0.283402	-0.133433	-0.221454	-0.147004	-0.363279	-0.278912	-0.445186	-0.150972	-0.191585	-0.322313	-0.244996
KEGG_ADIPOCYTOKINE_SIGNALING_PATHWAY	-0.311517	-0.251286	-0.183531	-0.289813	0.18399	-0.178178	-0.217202	0.176926	0.401211	-0.400481	-0.153611	0.199426	0.325907	0.20738	0.490543	0.339094	0.21851	0.297161	0.206626	-0.227189	-0.19156	-0.211847	0.236954	0.40437	-0.309975	-0.198938	0.251585	-0.216968	-0.20171	0.301889	0.368792	-0.179193	0.157936	0.38672	-0.264664	0.214589	0.277981	-0.326937	-0.222319	-0.260138	-0.253444	0.223579	0.210088	0.251631	-0.468266	0.283824	-0.233795	-0.347929	-0.188298
KEGG_TYPE_II_DIABETES_MELLITUS	-0.233369	0.290558	0.252819	-0.288134	0.189586	-0.392765	-0.369971	0.252932	0.29399	-0.384719	-0.247022	-0.240358	0.38704	-0.296783	0.421446	0.362648	-0.208391	0.213632	-0.208969	-0.33455	-0.184284	-0.147989	-0.272973	0.412402	-0.434155	-0.228048	0.155916	-0.302362	-0.318219	0.381358	0.260118	-0.245975	0.177729	0.23386	-0.203825	0.246814	0.242071	-0.379814	-0.178453	-0.238997	0.207962	-0.199138	-0.267232	0.163414	-0.49438	0.256156	-0.344818	-0.330585	-0.189331
KEGG_TYPE_I_DIABETES_MELLITUS	-0.333493	-0.499535	0.278347	0.273477	-0.193482	-0.483336	0.292452	0.442986	0.509906	-0.648497	-0.288294	0.196286	-0.446263	0.49032	0.693053	0.678096	-0.263923	0.6	0.676218	0.207675	-0.420748	-0.368407	-0.242827	0.367951	-0.602667	0.359456	-0.406061	-0.214631	-0.313524	0.674893	0.47665	-0.437003	-0.278993	0.60595	-0.234293	0.626918	0.238463	-0.527585	-0.20139	-0.678348	0.262574	0.612403	0.678742	0.467441	0.415737	0.354461	-0.460914	-0.294691	-0.163824
KEGG_MATURITY_ONSET_DIABETES_OF_THE_YOUNG	0.385513	-0.569488	-0.338499	-0.390428	-0.640626	0.518288	0.696038	0.366457	-0.504823	-0.378385	0.465088	0.345894	-0.298948	-0.283094	0.399816	0.533827	-0.278859	-0.349989	-0.383497	0.567857	0.465944	0.386405	0.433916	-0.438017	-0.693623	0.367601	0.237461	0.363149	0.539249	0.506809	0.348317	-0.500389	0.772	0.414516	0.762301	0.41078	-0.431991	0.267146	0.450391	0.851082	0.495525	0.685685	0.445798	-0.53955	0.380883	-0.30061	0.487827	0.713398	0.670319
KEGG_ALDOSTERONE_REGULATED_SODIUM_REABSORPTION	0.20125	0.467134	0.363785	-0.418834	-0.184894	-0.525668	-0.462085	0.33797	-0.273223	-0.310789	-0.402661	-0.171642	0.481925	-0.283346	0.519989	0.295022	0.28763	0.467378	-0.390066	-0.387291	-0.338308	0.203252	0.460568	0.24627	-0.272876	-0.376692	0.207242	-0.334761	-0.460589	0.409793	0.30095	-0.331272	0.252239	-0.358943	-0.317488	-0.19205	-0.352703	-0.487674	-0.362336	-0.360135	0.23096	0.235823	-0.26173	-0.207583	-0.472514	0.23474	-0.289088	-0.465067	-0.206782
KEGG_VASOPRESSIN_REGULATED_WATER_REABSORPTION	-0.190378	0.423257	0.302213	-0.3358	0.235094	-0.252532	-0.172901	0.220365	-0.341597	0.181279	-0.277787	-0.270412	0.260369	0.313716	0.186083	-0.167008	0.311263	0.20151	-0.193791	-0.303273	-0.276109	-0.196823	0.21281	-0.171965	0.251273	-0.439001	-0.210509	-0.240685	-0.516163	0.243588	0.195621	0.361168	-0.244759	-0.425499	-0.31403	0.308649	-0.328914	-0.374991	-0.3997	0.234589	-0.146584	0.217048	-0.375746	-0.369312	-0.229715	-0.233265	-0.193257	-0.402968	-0.248944
KEGG_PROXIMAL_TUBULE_BICARBONATE_RECLAMATION	0.289143	0.473625	0.270584	-0.196598	0.367525	0.300088	-0.399827	-0.265088	-0.504443	-0.345459	-0.239282	-0.327773	0.601807	0.365134	0.211074	-0.338288	0.314388	0.509857	-0.687359	0.192633	-0.228804	0.496612	0.37814	-0.401715	0.493505	0.232056	0.341871	-0.257183	-0.425431	0.616593	0.266367	-0.432524	0.363939	-0.351083	0.207656	0.242663	-0.470421	-0.545059	-0.571192	-0.603392	0.367529	0.610436	-0.314616	0.37997	0.199504	0.388003	0.263447	-0.347293	0.399065
KEGG_ALZHEIMERS_DISEASE	-0.237752	0.182348	-0.180691	0.287746	0.205807	0.350115	0.355149	-0.133384	0.128279	-0.33235	0.36361	-0.223774	-0.271656	-0.198957	-0.301294	-0.223772	0.141551	-0.15973	-0.343939	0.271821	0.162194	0.220328	-0.239854	-0.156152	-0.21445	0.167747	-0.221237	-0.215535	0.215285	0.290305	-0.235924	0.200538	0.364266	-0.207756	0.1824	-0.181888	0.148518	-0.199796	-0.22133	-0.224931	0.177068	0.13402	-0.152449	0.230048	0.363316	0.251736	0.280621	-0.221939	0.322662
KEGG_PARKINSONS_DISEASE	-0.315355	0.210784	-0.144561	0.477865	0.247402	0.60358	0.477605	-0.204052	-0.31104	-0.314939	0.562246	-0.357789	-0.527276	-0.344546	-0.555556	-0.365518	-0.216706	-0.27636	-0.449657	0.228092	0.158148	0.180839	-0.263275	-0.354487	0.198741	0.162234	-0.322248	-0.207272	0.264303	0.341228	-0.373794	-0.291708	0.484597	-0.180142	0.279715	0.138594	0.156431	-0.199259	-0.198	-0.196763	0.255467	0.152623	-0.164261	0.235363	0.567615	0.185689	0.47865	0.236366	0.439928
KEGG_AMYOTROPHIC_LATERAL_SCLEROSIS_ALS	-0.232646	0.205063	0.275854	0.184278	0.19968	0.100695	0.375156	0.230753	0.177829	-0.368128	0.213124	0.176109	0.13651	-0.184604	0.271343	-0.243759	0.176001	0.237737	-0.255999	-0.235276	-0.251518	-0.161968	-0.392819	0.169525	-0.267334	0.246038	0.183276	-0.25783	-0.1938	0.221536	0.246938	0.234381	-0.167048	0.207648	0.173654	0.25787	0.300173	0.181265	-0.155792	0.168362	0.338491	-0.127231	0.20922	-0.172213	0.146994	0.203738	0.196862	0.194129	0.214246
KEGG_HUNTINGTONS_DISEASE	-0.243445	0.207479	-0.213649	0.314683	0.240609	0.417762	0.364618	-0.173719	-0.191773	-0.203279	0.376285	-0.25229	-0.405296	-0.198182	-0.357964	-0.268328	-0.176734	-0.217312	-0.290563	0.215954	0.191038	0.137856	-0.220294	-0.125776	0.247462	0.148899	-0.238424	-0.232194	0.182262	0.217442	-0.267381	0.221445	0.33346	-0.210587	0.195981	-0.257297	0.117625	0.196725	-0.204534	-0.173268	0.19583	-0.219638	-0.189442	-0.148985	0.391526	0.13346	0.298304	0.190854	0.313523
KEGG_PRION_DISEASES	-0.173898	0.322813	0.360569	-0.371883	0.358333	-0.55046	-0.177974	0.272205	0.199608	0.20668	-0.429688	0.263694	0.337519	0.381622	0.481513	0.525121	0.204672	0.297853	0.291664	0.224598	-0.23843	-0.213991	0.315729	0.377316	0.297047	-0.332663	0.189286	0.308477	-0.41152	0.296591	0.271707	0.31715	-0.323029	-0.276115	-0.356776	0.278319	-0.238104	-0.260172	-0.419709	-0.394002	-0.266329	0.22038	0.229095	-0.198482	-0.240649	0.451066	-0.324088	-0.340867	-0.319017
KEGG_VIBRIO_CHOLERAE_INFECTION	0.194139	0.256285	0.244735	-0.232078	0.257703	-0.386429	-0.19243	0.321992	0.200029	-0.330408	-0.283262	-0.181945	0.278159	0.236538	0.374923	0.286701	0.279022	0.431295	-0.13867	0.26041	-0.335285	-0.232874	-0.161625	0.295016	-0.174456	-0.3004	0.30305	-0.257807	-0.350222	0.200477	0.292563	0.259589	-0.309165	-0.313296	-0.291945	0.26591	0.259258	-0.463005	-0.364557	-0.374083	-0.256265	0.276062	0.250206	-0.197166	-0.242376	0.361115	-0.250628	-0.336084	0.228896
KEGG_EPITHELIAL_CELL_SIGNALING_IN_HELICOBACTER_PYLORI_INFECTION	-0.170453	0.276677	-0.177065	-0.206142	-0.228438	-0.270754	0.165964	0.323406	-0.201176	-0.243135	-0.153497	0.170641	0.190451	-0.197951	0.373425	0.308861	-0.172222	0.367824	0.250649	-0.184966	-0.343153	-0.190584	-0.193784	0.246131	-0.305265	0.1995	0.229902	-0.266796	-0.318973	0.164226	0.34248	0.166351	-0.309149	0.249496	-0.256118	0.39624	0.286516	-0.414813	-0.285673	-0.298162	-0.141409	0.290623	0.265704	0.22215	-0.35403	0.323401	-0.232698	-0.348354	0.203552
KEGG_PATHOGENIC_ESCHERICHIA_COLI_INFECTION	0.352002	0.275466	-0.175394	0.31998	0.39186	-0.4546	0.27854	0.398987	0.394834	-0.305239	-0.515549	0.199382	-0.164011	0.305503	0.256027	0.25112	-0.188593	0.434826	0.363242	-0.232228	-0.558006	-0.152565	0.201918	0.433665	-0.288081	-0.245641	0.408832	0.158309	-0.390206	-0.192474	0.286203	0.386369	-0.359292	0.25252	-0.569358	0.440079	0.381329	-0.398837	-0.609911	-0.283195	-0.291505	0.297184	-0.28729	-0.19785	-0.28308	0.493473	-0.16962	-0.490481	-0.3754
KEGG_LEISHMANIA_INFECTION	-0.201814	-0.496917	-0.191257	0.377109	-0.302019	-0.455136	0.237905	0.535564	0.530165	-0.60238	-0.37079	0.301739	0.242137	0.424886	0.621432	0.642783	-0.299479	0.551464	0.558257	0.329603	-0.332288	-0.21858	-0.193998	0.472881	-0.622101	0.353587	0.194609	-0.234322	0.207893	0.3938	0.596101	-0.228714	-0.385563	0.572883	-0.358016	0.497954	0.583018	-0.322992	-0.218204	-0.477391	-0.174232	0.508275	0.498272	0.361656	-0.414455	0.521032	-0.368147	-0.272131	-0.143977
KEGG_PATHWAYS_IN_CANCER	0.227833	-0.178718	-0.130549	-0.257291	-0.151733	-0.362618	-0.152438	0.302004	0.354359	-0.233918	-0.354685	0.225381	0.264554	0.224506	0.317526	0.235744	0.228415	0.177084	0.213765	-0.210321	-0.231119	-0.121264	0.245065	0.269217	-0.232944	-0.20346	0.263167	-0.173418	-0.310831	0.171165	0.214294	0.195793	-0.198109	-0.128225	-0.352841	0.150738	0.249992	-0.26728	-0.276836	-0.182115	-0.233589	-0.135806	-0.179037	-0.166824	-0.353229	0.298871	-0.274671	-0.236122	-0.301574
KEGG_COLORECTAL_CANCER	0.186195	0.253432	0.204821	-0.272778	-0.145396	-0.389482	0.177688	0.342799	0.26869	0.208966	-0.343276	-0.19804	0.232354	0.201564	0.217896	0.215058	0.191696	-0.160698	-0.214765	-0.395484	-0.377719	0.233242	0.170391	0.236118	0.125415	-0.340277	0.257367	0.194405	-0.464667	0.192245	0.16213	0.202587	-0.143817	-0.246821	-0.406395	0.177576	-0.158135	-0.372006	-0.484137	-0.220516	-0.205277	-0.260727	-0.348885	-0.269219	-0.363042	0.236135	-0.164278	-0.377103	-0.391622
KEGG_RENAL_CELL_CARCINOMA	0.315813	0.306021	0.309263	-0.205414	-0.251896	-0.426881	0.181646	0.336641	0.289647	-0.358421	-0.367622	-0.279605	0.400647	0.180857	0.399158	0.255263	0.254439	0.217808	0.214921	-0.371113	-0.403167	0.389319	0.253294	0.305568	-0.152006	-0.341663	0.32938	-0.220681	-0.446268	0.214874	0.219701	0.275582	-0.169876	-0.298189	-0.459412	0.163562	0.192364	-0.470469	-0.454808	0.189323	-0.382046	-0.206491	-0.407058	-0.203381	-0.460123	0.293885	-0.247563	-0.484	-0.381038
KEGG_PANCREATIC_CANCER	0.265666	-0.20044	0.236617	-0.269528	-0.118495	-0.349	0.170967	0.347493	0.265492	-0.262242	-0.317836	0.183434	0.221505	0.192692	0.365426	0.294116	0.237425	0.176107	0.225952	-0.327258	-0.320276	0.180546	0.260812	0.272857	-0.237068	-0.175605	0.280433	0.231721	-0.354763	0.223545	0.280922	0.240753	-0.167878	-0.155014	-0.404227	0.266912	0.197126	-0.372312	-0.303211	-0.33983	-0.281362	0.252885	-0.202267	-0.241673	-0.422335	0.293499	-0.278307	-0.32576	-0.232983
KEGG_ENDOMETRIAL_CANCER	0.222327	0.328132	0.217986	-0.441089	-0.273319	-0.433628	-0.15684	0.318057	0.219285	0.241524	-0.32016	-0.230677	0.319847	0.176896	0.298184	-0.202994	0.299614	-0.209307	-0.280721	-0.391807	-0.299979	0.23233	0.306771	0.192685	0.17832	-0.437904	0.170681	0.240789	-0.446716	0.199851	0.140944	0.318797	0.140337	-0.368678	-0.34771	-0.314472	-0.198651	-0.417224	-0.397721	0.251112	-0.208641	-0.346523	-0.446861	-0.376008	-0.435854	0.166332	-0.134522	-0.334768	-0.37003
KEGG_GLIOMA	-0.184522	0.299091	0.295867	-0.334296	-0.215147	-0.435395	0.31832	0.233898	0.143739	0.204418	-0.414124	-0.24307	0.252088	0.33244	0.313119	0.274555	0.251524	0.202687	-0.161802	-0.348302	-0.255548	0.340839	0.36391	0.219097	-0.169352	-0.338119	-0.213819	-0.183407	-0.388235	0.223136	0.216935	0.307602	-0.152577	-0.379731	-0.41233	-0.28579	0.12805	-0.450206	-0.316704	-0.240423	-0.324605	-0.233091	-0.313818	0.192367	-0.301371	0.238283	-0.144548	-0.401058	-0.317139
KEGG_PROSTATE_CANCER	0.192307	0.201981	0.221366	-0.319142	-0.226343	-0.348287	-0.157523	0.2922	0.289957	-0.210814	-0.367977	0.171905	0.252013	0.211759	0.31679	0.307988	0.202471	0.128862	0.163858	-0.259398	-0.263021	0.162716	0.240821	0.243753	0.175462	-0.358699	-0.13935	-0.155782	-0.376562	-0.133913	0.213158	0.304624	-0.20518	-0.248384	-0.425982	-0.291826	0.138119	-0.371458	-0.358537	-0.252646	-0.269239	-0.220511	-0.277793	-0.191588	-0.396971	0.188507	-0.232142	-0.307529	-0.308754
KEGG_THYROID_CANCER	-0.1905	-0.212239	0.233077	-0.272309	0.251636	-0.375466	-0.371978	0.293581	0.4308	0.156796	-0.336179	0.260525	0.252104	0.211287	0.361989	0.31253	-0.240332	0.363981	-0.279811	-0.361075	-0.430058	0.286184	0.269422	0.321261	0.327864	-0.364179	0.284089	0.392164	-0.372138	-0.26233	0.12756	0.416044	-0.343956	-0.204775	-0.523924	0.200953	0.250296	-0.500589	-0.461181	-0.233293	-0.450047	-0.335322	-0.426959	-0.378294	-0.400263	0.235602	0.224285	-0.376245	-0.227583
KEGG_BASAL_CELL_CARCINOMA	0.277616	0.266518	-0.340842	-0.528279	-0.350822	-0.443665	-0.223651	0.327174	0.412002	0.468693	-0.31725	0.245525	0.313763	0.220103	0.145627	-0.247597	0.396021	-0.225663	-0.205515	-0.180612	0.253211	-0.274175	0.368568	0.170013	-0.190103	-0.326253	-0.185379	-0.191208	-0.284486	-0.18272	0.116665	0.205418	0.246005	-0.431325	-0.227437	-0.333053	-0.269509	-0.16617	0.158942	0.179476	0.321659	-0.277166	-0.239146	-0.363166	-0.541359	-0.213869	-0.20678	0.328136	-0.436842
KEGG_MELANOMA	-0.213928	0.183208	0.314382	-0.272002	-0.24454	-0.326451	0.267731	0.272536	0.228309	-0.279894	-0.337027	0.19809	0.232895	0.185805	0.27167	0.266005	0.197679	0.225801	-0.186433	-0.325521	-0.256353	0.334462	0.381543	0.262954	0.150693	-0.276913	0.17381	-0.284892	-0.318383	0.18171	0.192221	0.286761	-0.20548	-0.233206	-0.435197	-0.346462	0.190587	-0.367321	-0.307478	-0.28342	-0.352618	-0.230289	-0.241826	0.199046	-0.310457	0.285403	-0.260762	-0.33144	-0.286673
KEGG_BLADDER_CANCER	0.222041	-0.218775	0.240155	-0.32214	0.172167	-0.295185	0.293575	0.265046	0.266819	-0.308436	-0.342645	0.306582	0.298779	0.310333	0.256776	0.296266	0.263581	-0.249589	-0.16831	-0.251219	-0.211206	-0.25616	0.344148	0.268895	0.229105	0.300968	0.248126	-0.35343	0.154486	-0.330601	-0.137323	0.2476	-0.247856	-0.118557	-0.345138	-0.333458	0.315063	0.196812	-0.24063	-0.166228	-0.344656	0.242173	0.223136	-0.298362	-0.255995	0.302874	-0.272051	-0.166705	-0.233018
KEGG_CHRONIC_MYELOID_LEUKEMIA	0.227667	0.234049	0.267681	-0.288612	-0.220732	-0.404243	0.150297	0.328226	0.241841	0.179426	-0.411874	0.162323	0.268443	0.265256	0.381976	0.325806	-0.193491	-0.155217	-0.212422	-0.322646	-0.352708	0.290346	0.270963	0.267732	0.167237	-0.299812	0.170355	0.177	-0.406151	-0.173046	0.242181	0.261362	-0.275214	-0.281292	-0.437586	-0.179253	0.171096	-0.393178	-0.312047	-0.258517	-0.283796	-0.181664	-0.182266	-0.244688	-0.437365	0.321087	-0.266101	-0.357891	-0.373146
KEGG_ACUTE_MYELOID_LEUKEMIA	0.166703	0.197224	0.191116	-0.305661	0.179207	-0.442105	0.174612	0.381704	0.325463	-0.303151	-0.319871	0.205146	0.187953	0.206474	0.483101	0.415468	-0.181202	0.174188	0.26553	-0.260261	-0.238813	0.194319	0.226299	0.347883	-0.186574	-0.317232	0.16017	-0.144856	-0.294762	-0.187474	0.309314	0.241482	-0.282957	-0.211938	-0.384796	0.188196	0.247891	-0.382332	-0.304078	-0.249637	-0.221865	-0.238376	0.217262	-0.329328	-0.574224	0.226435	-0.403172	-0.238544	-0.227676
KEGG_SMALL_CELL_LUNG_CANCER	0.210964	-0.285009	-0.198802	-0.19791	-0.186501	-0.333461	-0.15778	0.281028	0.448016	-0.249328	-0.40742	0.31608	0.223949	0.302354	0.350094	0.267043	0.26868	0.138462	0.246976	-0.240326	-0.22627	-0.160362	0.30054	0.282	-0.236728	0.28623	0.260751	0.192166	-0.233847	-0.212388	0.299785	0.235399	-0.233116	0.140427	-0.40781	-0.1642	0.400092	-0.240902	-0.299385	-0.225766	-0.292898	-0.259942	0.167782	0.184739	-0.367184	0.366332	-0.321884	-0.275752	-0.350751
KEGG_NON_SMALL_CELL_LUNG_CANCER	-0.181426	0.297221	0.30648	-0.337445	-0.265208	-0.420795	-0.218604	0.313636	0.133429	0.24788	-0.340381	0.162089	0.22088	0.216014	0.35978	0.274751	-0.208831	-0.199489	-0.196048	-0.401282	-0.270096	0.179316	0.33823	0.199367	0.199295	-0.352268	-0.220769	0.155367	-0.366563	0.218021	0.239558	0.26223	-0.130711	-0.269156	-0.391557	-0.224897	0.131843	-0.394803	-0.359003	-0.220713	-0.372722	-0.185257	-0.305745	-0.285524	-0.354611	0.170699	0.153939	-0.349859	-0.34687
KEGG_ASTHMA	-0.439957	-0.709234	0.37077	0.573748	-0.685237	-0.629078	0.586017	0.862923	0.648594	-0.79627	0.420385	0.510044	-0.739197	0.561707	0.854056	0.954749	-0.559065	0.816107	0.775581	0.630591	-0.588508	-0.57501	-0.482066	0.422156	-0.77711	0.506536	-0.574208	-0.509302	-0.223753	0.740714	0.797187	-0.566416	0.319609	0.795688	-0.614545	0.900988	0.624093	-0.608703	0.29627	-0.81832	-0.273339	0.839788	0.888096	0.709336	-0.426824	0.362786	0.32338	-0.478576	0.516584
KEGG_AUTOIMMUNE_THYROID_DISEASE	-0.293895	-0.70974	-0.214074	0.468897	-0.261244	-0.391863	0.455723	0.706302	0.623762	-0.76807	-0.235013	0.209521	-0.586476	0.545355	0.789031	0.79144	-0.254564	0.64707	0.739945	0.347904	-0.441025	-0.581366	0.282164	0.489284	-0.703254	0.47233	-0.437418	0.215529	-0.202089	0.733415	0.598218	-0.482587	-0.424742	0.761261	-0.34639	0.733382	0.5082	-0.443324	0.296481	-0.639628	-0.254972	0.697982	0.770634	0.576145	0.436574	0.439183	-0.495525	-0.213972	0.203736
KEGG_SYSTEMIC_LUPUS_ERYTHEMATOSUS	0.29216	-0.571288	0.159507	0.40178	-0.262992	-0.37493	0.440189	0.505243	0.462154	-0.596844	-0.319031	0.414311	-0.41608	0.337242	0.656427	0.691544	-0.34129	0.591768	0.518878	0.482761	-0.200732	-0.395737	-0.206566	0.410878	-0.559062	0.421084	-0.291676	0.231339	0.157669	0.456429	0.448006	-0.279712	-0.402277	0.54057	-0.383829	0.63822	0.454166	0.202736	0.160307	-0.468806	0.208214	0.605825	0.648356	0.451669	0.244188	0.483171	-0.269509	-0.132589	0.296796
KEGG_ALLOGRAFT_REJECTION	-0.166207	-0.709668	-0.214053	0.487377	-0.265537	-0.468513	0.543216	0.703545	0.620786	-0.796757	-0.313573	0.200687	-0.580703	0.599824	0.81858	0.802436	-0.283467	0.668794	0.737076	0.337653	-0.540264	-0.568399	0.34422	0.452019	-0.702019	0.561899	-0.391634	0.21663	-0.228102	0.72938	0.64091	-0.457977	-0.438388	0.812762	-0.504877	0.776751	0.487592	-0.487766	0.296451	-0.687822	-0.273506	0.701337	0.802986	0.56131	0.437499	0.452851	-0.446989	-0.352845	0.161694
KEGG_GRAFT_VERSUS_HOST_DISEASE	-0.17152	-0.709595	-0.214031	0.483714	-0.273422	-0.458563	0.5384	0.699671	0.61875	-0.796676	-0.37215	-0.296931	-0.570796	0.576521	0.825821	0.795761	-0.324403	0.712466	0.760942	0.290941	-0.547541	-0.574864	0.349926	0.424904	-0.701948	0.558649	-0.432168	0.226579	-0.291645	0.764636	0.620904	-0.49535	-0.557743	0.809883	-0.505862	0.765435	0.447412	-0.511757	0.296421	-0.70847	-0.273478	0.756671	0.79673	0.562331	0.509871	0.423352	-0.462423	-0.352809	-0.26838
KEGG_PRIMARY_IMMUNODEFICIENCY	-0.292759	-0.621669	-0.463249	0.276492	-0.37435	0.231108	0.329625	0.454363	0.41293	-0.552301	0.480387	0.189585	-0.587104	0.573872	0.51757	0.640053	-0.359	0.419612	0.463738	0.242569	-0.195298	-0.231672	0.163712	-0.262962	-0.563817	0.344804	-0.225532	0.450707	0.371228	0.351448	0.498594	-0.498671	-0.198334	0.67594	0.18409	0.609849	0.526068	0.148313	0.442331	0.182321	0.225794	0.560069	0.701901	0.364109	-0.418467	0.340333	-0.428763	0.412668	0.477192
KEGG_HYPERTROPHIC_CARDIOMYOPATHY_HCM	0.230703	-0.216895	-0.327646	0.145066	0.359114	-0.230855	-0.135286	-0.173316	0.363855	-0.412835	-0.241889	0.267495	0.347018	0.236127	0.367606	0.238373	0.282611	0.446033	0.310718	-0.139676	-0.243872	0.187389	-0.165223	0.298087	-0.482354	0.177803	0.247892	-0.353528	-0.170471	0.202626	0.378387	0.224781	0.204762	0.165871	-0.196556	0.265414	0.28572	-0.24421	-0.302678	0.182871	0.261167	-0.271519	0.2342	0.266584	-0.370147	0.414181	-0.482684	-0.264437	-0.173355
KEGG_ARRHYTHMOGENIC_RIGHT_VENTRICULAR_CARDIOMYOPATHY_ARVC	0.255793	0.214595	-0.193553	-0.336149	0.317235	-0.428501	-0.165505	0.291263	0.358091	-0.303379	-0.412852	0.251603	0.428623	0.309443	0.326417	0.223051	0.373287	0.403321	-0.199522	0.183083	-0.221467	0.26498	0.29756	0.170764	-0.41683	-0.152763	0.286365	-0.303157	-0.313981	0.237156	0.262134	0.303894	0.241746	-0.248217	-0.231804	0.199511	0.21375	-0.284525	-0.343488	0.171711	0.221121	-0.196632	-0.213189	-0.238107	-0.364243	0.381104	-0.496826	-0.262063	-0.212366
KEGG_DILATED_CARDIOMYOPATHY	0.207069	0.238558	-0.223361	-0.314113	0.324548	-0.439804	-0.159797	0.266024	0.328759	-0.347745	-0.329915	-0.213492	0.338587	0.28356	0.390462	0.252409	0.294746	0.379739	0.267916	-0.136236	0.196654	0.190391	0.204993	0.237786	-0.431349	-0.198196	-0.209203	-0.359961	-0.269443	0.219437	0.320485	0.276755	0.171507	-0.227527	-0.185658	0.261331	0.233793	-0.264424	-0.276272	0.186279	0.2845	-0.234908	0.222509	0.176832	-0.39121	0.33818	-0.507236	-0.307806	-0.217136
KEGG_VIRAL_MYOCARDITIS	0.24824	-0.406457	0.304201	0.216731	-0.176247	-0.441177	0.20957	0.561294	0.313685	-0.470486	-0.50492	0.232421	0.182538	0.473483	0.528203	0.499433	0.217498	0.543298	0.494007	0.182759	-0.274954	-0.24343	-0.183793	0.341309	-0.46944	0.234369	-0.172896	-0.270421	-0.29492	0.367861	0.310807	0.175164	-0.236745	0.382149	-0.320722	0.423715	0.334681	-0.214283	-0.236509	-0.274816	-0.229989	0.352685	0.447415	0.260916	-0.208231	0.389967	-0.390104	-0.152569	-0.200249
[truncated: 206 more columns]
