# Supplementary material for: Integrating machine learning and bioinformatics analysis to m6A regulator-mediated methylation modification models for predicting glioblastoma patients’ prognosis and immunotherapy response
Source: Aging (Albany NY). 2023 May 23;15(10):4051–70. doi: 10.18632/aging.204495 (PMC10257999; doi:10.18632/aging.204495)
Supplement: Supplementary Table 7b [file aging-15-204495-s009.xls]

## Sheet: SupplementaryTable7_GSVA_wilcox
Supplementary Table 7b. GSVA_wilcox.
wilcox_result	wilcox_result_adjust
KEGG_GLYCOLYSIS_GLUCONEOGENESIS	1.71852e-09	3.19645e-07
KEGG_CITRATE_CYCLE_TCA_CYCLE	0.996437	1
KEGG_PENTOSE_PHOSPHATE_PATHWAY	1.93859e-10	3.60578e-08
KEGG_PENTOSE_AND_GLUCURONATE_INTERCONVERSIONS	2.21148e-11	4.11334e-09
KEGG_FRUCTOSE_AND_MANNOSE_METABOLISM	1.02608e-24	1.90851e-22
KEGG_GALACTOSE_METABOLISM	7.12279e-30	1.32484e-27
KEGG_ASCORBATE_AND_ALDARATE_METABOLISM	0.0418085	1
KEGG_FATTY_ACID_METABOLISM	2.26522e-06	0.00042133
KEGG_STEROID_BIOSYNTHESIS	0.00867863	1
KEGG_PRIMARY_BILE_ACID_BIOSYNTHESIS	1.98685e-27	3.69554e-25
KEGG_STEROID_HORMONE_BIOSYNTHESIS	2.2799e-53	4.24061e-51
KEGG_OXIDATIVE_PHOSPHORYLATION	4.37484e-33	8.1372e-31
KEGG_PURINE_METABOLISM	0.0831467	1
KEGG_PYRIMIDINE_METABOLISM	0.060888	1
KEGG_ALANINE_ASPARTATE_AND_GLUTAMATE_METABOLISM	8.47938e-14	1.57717e-11
KEGG_GLYCINE_SERINE_AND_THREONINE_METABOLISM	1.3396e-05	0.00249166
KEGG_CYSTEINE_AND_METHIONINE_METABOLISM	0.0407882	1
KEGG_VALINE_LEUCINE_AND_ISOLEUCINE_DEGRADATION	0.745527	1
KEGG_VALINE_LEUCINE_AND_ISOLEUCINE_BIOSYNTHESIS	3.74481e-21	6.96534e-19
KEGG_LYSINE_DEGRADATION	9.14571e-27	1.7011e-24
KEGG_ARGININE_AND_PROLINE_METABOLISM	5.5034e-41	1.02363e-38
KEGG_HISTIDINE_METABOLISM	7.57709e-12	1.40934e-09
KEGG_TYROSINE_METABOLISM	3.38088e-57	6.28844e-55
KEGG_PHENYLALANINE_METABOLISM	3.41744e-88	6.35643e-86
KEGG_TRYPTOPHAN_METABOLISM	5.0279e-28	9.3519e-26
KEGG_BETA_ALANINE_METABOLISM	0.951724	1
KEGG_TAURINE_AND_HYPOTAURINE_METABOLISM	5.27389e-15	9.80944e-13
KEGG_SELENOAMINO_ACID_METABOLISM	6.09397e-05	0.0113348
KEGG_GLUTATHIONE_METABOLISM	8.32049e-32	1.54761e-29
KEGG_STARCH_AND_SUCROSE_METABOLISM	3.86214e-08	7.18358e-06
KEGG_N_GLYCAN_BIOSYNTHESIS	0.00325519	0.605466
KEGG_OTHER_GLYCAN_DEGRADATION	1.38911e-17	2.58375e-15
KEGG_O_GLYCAN_BIOSYNTHESIS	1.2346e-08	2.29636e-06
KEGG_AMINO_SUGAR_AND_NUCLEOTIDE_SUGAR_METABOLISM	5.06549e-23	9.42181e-21
KEGG_GLYCOSAMINOGLYCAN_DEGRADATION	7.67055e-21	1.42672e-18
KEGG_GLYCOSAMINOGLYCAN_BIOSYNTHESIS_CHONDROITIN_SULFATE	0.00141779	0.263709
KEGG_GLYCOSAMINOGLYCAN_BIOSYNTHESIS_KERATAN_SULFATE	4.46442e-11	8.30382e-09
KEGG_GLYCOSAMINOGLYCAN_BIOSYNTHESIS_HEPARAN_SULFATE	5.80129e-06	0.00107904
KEGG_GLYCEROLIPID_METABOLISM	1.17001e-26	2.17622e-24
KEGG_INOSITOL_PHOSPHATE_METABOLISM	0.0178014	1
KEGG_GLYCOSYLPHOSPHATIDYLINOSITOL_GPI_ANCHOR_BIOSYNTHESIS	0.00033855	0.0629703
KEGG_GLYCEROPHOSPHOLIPID_METABOLISM	5.16961e-16	9.61548e-14
KEGG_ETHER_LIPID_METABOLISM	0.00102778	0.191168
KEGG_ARACHIDONIC_ACID_METABOLISM	2.61322e-77	4.86059e-75
KEGG_LINOLEIC_ACID_METABOLISM	1.14577e-09	2.13114e-07
KEGG_ALPHA_LINOLENIC_ACID_METABOLISM	0.00470942	0.875951
KEGG_SPHINGOLIPID_METABOLISM	3.07937e-26	5.72763e-24
KEGG_GLYCOSPHINGOLIPID_BIOSYNTHESIS_LACTO_AND_NEOLACTO_SERIES	1.13706e-12	2.11493e-10
KEGG_GLYCOSPHINGOLIPID_BIOSYNTHESIS_GLOBO_SERIES	8.55141e-50	1.59056e-47
KEGG_GLYCOSPHINGOLIPID_BIOSYNTHESIS_GANGLIO_SERIES	1.7176e-40	3.19473e-38
KEGG_PYRUVATE_METABOLISM	1.43516e-10	2.6694e-08
KEGG_GLYOXYLATE_AND_DICARBOXYLATE_METABOLISM	4.78589e-13	8.90175e-11
KEGG_PROPANOATE_METABOLISM	0.221427	1
KEGG_BUTANOATE_METABOLISM	0.107584	1
KEGG_ONE_CARBON_POOL_BY_FOLATE	1.96699e-11	3.6586e-09
KEGG_RIBOFLAVIN_METABOLISM	2.41218e-07	4.48666e-05
KEGG_NICOTINATE_AND_NICOTINAMIDE_METABOLISM	5.43371e-08	1.01067e-05
KEGG_PANTOTHENATE_AND_COA_BIOSYNTHESIS	5.43842e-05	0.0101155
KEGG_FOLATE_BIOSYNTHESIS	1.10579e-20	2.05677e-18
KEGG_RETINOL_METABOLISM	5.86596e-21	1.09107e-18
KEGG_PORPHYRIN_AND_CHLOROPHYLL_METABOLISM	2.2032e-35	4.09796e-33
KEGG_TERPENOID_BACKBONE_BIOSYNTHESIS	0.092807	1
KEGG_LIMONENE_AND_PINENE_DEGRADATION	0.0152887	1
KEGG_NITROGEN_METABOLISM	9.53428e-06	0.00177338
KEGG_SULFUR_METABOLISM	0.00361852	0.673044
KEGG_AMINOACYL_TRNA_BIOSYNTHESIS	3.43371e-06	0.00063867
KEGG_METABOLISM_OF_XENOBIOTICS_BY_CYTOCHROME_P450	1.09293e-64	2.03285e-62
KEGG_DRUG_METABOLISM_CYTOCHROME_P450	4.87774e-64	9.0726e-62
KEGG_DRUG_METABOLISM_OTHER_ENZYMES	4.16492e-05	0.00774675
KEGG_BIOSYNTHESIS_OF_UNSATURATED_FATTY_ACIDS	0.975587	1
KEGG_ABC_TRANSPORTERS	0.920153	1
KEGG_RIBOSOME	7.14376e-09	1.32874e-06
KEGG_RNA_DEGRADATION	4.14531e-16	7.71027e-14
KEGG_RNA_POLYMERASE	0.657422	1
KEGG_BASAL_TRANSCRIPTION_FACTORS	8.06125e-31	1.49939e-28
KEGG_DNA_REPLICATION	4.03366e-11	7.5026e-09
KEGG_SPLICEOSOME	3.16141e-43	5.88022e-41
KEGG_PROTEASOME	0.933821	1
KEGG_PROTEIN_EXPORT	0.00922009	1
KEGG_PPAR_SIGNALING_PATHWAY	1.69228e-16	3.14764e-14
KEGG_BASE_EXCISION_REPAIR	0.223937	1
KEGG_NUCLEOTIDE_EXCISION_REPAIR	5.86985e-06	0.00109179
KEGG_MISMATCH_REPAIR	3.55206e-16	6.60683e-14
KEGG_HOMOLOGOUS_RECOMBINATION	6.9258e-06	0.0012882
KEGG_NON_HOMOLOGOUS_END_JOINING	2.96175e-25	5.50885e-23
KEGG_MAPK_SIGNALING_PATHWAY	3.86164e-06	0.000718265
KEGG_ERBB_SIGNALING_PATHWAY	1.41033e-12	2.62321e-10
KEGG_CALCIUM_SIGNALING_PATHWAY	3.16232e-21	5.88192e-19
KEGG_CYTOKINE_CYTOKINE_RECEPTOR_INTERACTION	6.68157e-24	1.24277e-21
KEGG_CHEMOKINE_SIGNALING_PATHWAY	0.119657	1
KEGG_PHOSPHATIDYLINOSITOL_SIGNALING_SYSTEM	0.554061	1
KEGG_NEUROACTIVE_LIGAND_RECEPTOR_INTERACTION	5.25507e-20	9.77444e-18
KEGG_CELL_CYCLE	1.75125e-44	3.25733e-42
KEGG_OOCYTE_MEIOSIS	2.10442e-20	3.91423e-18
KEGG_P53_SIGNALING_PATHWAY	6.03026e-05	0.0112163
KEGG_UBIQUITIN_MEDIATED_PROTEOLYSIS	3.89697e-54	7.24836e-52
KEGG_SNARE_INTERACTIONS_IN_VESICULAR_TRANSPORT	1.55295e-37	2.88848e-35
KEGG_REGULATION_OF_AUTOPHAGY	0.0767662	1
KEGG_LYSOSOME	3.18891e-17	5.93138e-15
KEGG_ENDOCYTOSIS	0.00108024	0.200925
KEGG_PEROXISOME	2.81108e-14	5.22862e-12
KEGG_MTOR_SIGNALING_PATHWAY	6.49652e-10	1.20835e-07
KEGG_APOPTOSIS	6.78645e-14	1.26228e-11
KEGG_CARDIAC_MUSCLE_CONTRACTION	3.38253e-24	6.2915e-22
KEGG_VASCULAR_SMOOTH_MUSCLE_CONTRACTION	0.0458563	1
KEGG_WNT_SIGNALING_PATHWAY	3.75711e-17	6.98822e-15
KEGG_DORSO_VENTRAL_AXIS_FORMATION	2.23747e-09	4.1617e-07
KEGG_NOTCH_SIGNALING_PATHWAY	1.20505e-28	2.2414e-26
KEGG_HEDGEHOG_SIGNALING_PATHWAY	3.09028e-19	5.74791e-17
KEGG_TGF_BETA_SIGNALING_PATHWAY	1.94861e-23	3.62441e-21
KEGG_AXON_GUIDANCE	0.378141	1
KEGG_VEGF_SIGNALING_PATHWAY	2.06483e-09	3.84058e-07
KEGG_FOCAL_ADHESION	0.300516	1
KEGG_ECM_RECEPTOR_INTERACTION	0.0668586	1
KEGG_CELL_ADHESION_MOLECULES_CAMS	3.17904e-20	5.91301e-18
KEGG_ADHERENS_JUNCTION	6.18688e-11	1.15076e-08
KEGG_TIGHT_JUNCTION	4.59862e-05	0.00855343
KEGG_GAP_JUNCTION	2.70781e-07	5.03653e-05
KEGG_COMPLEMENT_AND_COAGULATION_CASCADES	3.08665e-18	5.74116e-16
KEGG_ANTIGEN_PROCESSING_AND_PRESENTATION	0.00502505	0.934659
KEGG_RENIN_ANGIOTENSIN_SYSTEM	0.945534	1
KEGG_TOLL_LIKE_RECEPTOR_SIGNALING_PATHWAY	4.86318e-12	9.04551e-10
KEGG_NOD_LIKE_RECEPTOR_SIGNALING_PATHWAY	1.41788e-14	2.63726e-12
KEGG_RIG_I_LIKE_RECEPTOR_SIGNALING_PATHWAY	2.77732e-11	5.16582e-09
KEGG_CYTOSOLIC_DNA_SENSING_PATHWAY	8.81361e-12	1.63933e-09
KEGG_JAK_STAT_SIGNALING_PATHWAY	0.145949	1
KEGG_HEMATOPOIETIC_CELL_LINEAGE	1.4607e-28	2.71691e-26
KEGG_NATURAL_KILLER_CELL_MEDIATED_CYTOTOXICITY	6.50995e-15	1.21085e-12
KEGG_T_CELL_RECEPTOR_SIGNALING_PATHWAY	0.969256	1
KEGG_B_CELL_RECEPTOR_SIGNALING_PATHWAY	0.0028352	0.527346
KEGG_FC_EPSILON_RI_SIGNALING_PATHWAY	0.507238	1
KEGG_FC_GAMMA_R_MEDIATED_PHAGOCYTOSIS	0.0105437	1
KEGG_LEUKOCYTE_TRANSENDOTHELIAL_MIGRATION	5.86756e-05	0.0109137
KEGG_INTESTINAL_IMMUNE_NETWORK_FOR_IGA_PRODUCTION	2.0762e-41	3.86173e-39
KEGG_CIRCADIAN_RHYTHM_MAMMAL	9.70391e-13	1.80493e-10
KEGG_LONG_TERM_POTENTIATION	0.220367	1
KEGG_NEUROTROPHIN_SIGNALING_PATHWAY	1.63369e-11	3.03867e-09
KEGG_LONG_TERM_DEPRESSION	0.00106456	0.198008
KEGG_OLFACTORY_TRANSDUCTION	0.0481693	1
KEGG_TASTE_TRANSDUCTION	0.0721164	1
KEGG_REGULATION_OF_ACTIN_CYTOSKELETON	0.255031	1
KEGG_INSULIN_SIGNALING_PATHWAY	2.57672e-08	4.7927e-06
KEGG_GNRH_SIGNALING_PATHWAY	0.665697	1
KEGG_PROGESTERONE_MEDIATED_OOCYTE_MATURATION	7.29266e-24	1.35643e-21
KEGG_MELANOGENESIS	4.87581e-06	0.0009069
KEGG_ADIPOCYTOKINE_SIGNALING_PATHWAY	8.38165e-10	1.55899e-07
KEGG_TYPE_II_DIABETES_MELLITUS	0.0879929	1
KEGG_TYPE_I_DIABETES_MELLITUS	4.43365e-19	8.24659e-17
KEGG_MATURITY_ONSET_DIABETES_OF_THE_YOUNG	0.000159955	0.0297517
KEGG_ALDOSTERONE_REGULATED_SODIUM_REABSORPTION	0.105076	1
KEGG_VASOPRESSIN_REGULATED_WATER_REABSORPTION	1.88812e-12	3.5119e-10
KEGG_PROXIMAL_TUBULE_BICARBONATE_RECLAMATION	9.73505e-07	0.000181072
KEGG_ALZHEIMERS_DISEASE	2.72339e-36	5.06551e-34
KEGG_PARKINSONS_DISEASE	1.2823e-21	2.38509e-19
KEGG_AMYOTROPHIC_LATERAL_SCLEROSIS_ALS	6.60492e-32	1.22852e-29
KEGG_HUNTINGTONS_DISEASE	7.23869e-22	1.3464e-19
KEGG_PRION_DISEASES	0.0895435	1
KEGG_VIBRIO_CHOLERAE_INFECTION	1.53819e-07	2.86103e-05
KEGG_EPITHELIAL_CELL_SIGNALING_IN_HELICOBACTER_PYLORI_INFECTION	2.25969e-06	0.000420302
KEGG_PATHOGENIC_ESCHERICHIA_COLI_INFECTION	0.0309799	1
KEGG_LEISHMANIA_INFECTION	3.57255e-15	6.64495e-13
KEGG_PATHWAYS_IN_CANCER	1.60555e-08	2.98632e-06
KEGG_COLORECTAL_CANCER	8.77697e-29	1.63252e-26
KEGG_RENAL_CELL_CARCINOMA	8.59553e-16	1.59877e-13
KEGG_PANCREATIC_CANCER	3.63304e-10	6.75745e-08
KEGG_ENDOMETRIAL_CANCER	9.20127e-28	1.71144e-25
KEGG_GLIOMA	1.10392e-16	2.0533e-14
KEGG_PROSTATE_CANCER	1.6678e-30	3.1021e-28
KEGG_THYROID_CANCER	0.183324	1
KEGG_BASAL_CELL_CARCINOMA	2.25723e-07	4.19845e-05
KEGG_MELANOMA	1.31747e-12	2.45049e-10
KEGG_BLADDER_CANCER	0.0507751	1
KEGG_CHRONIC_MYELOID_LEUKEMIA	8.70121e-19	1.61843e-16
KEGG_ACUTE_MYELOID_LEUKEMIA	0.0722475	1
KEGG_SMALL_CELL_LUNG_CANCER	3.74441e-08	6.9646e-06
KEGG_NON_SMALL_CELL_LUNG_CANCER	4.57899e-18	8.51692e-16
KEGG_ASTHMA	6.39851e-25	1.19012e-22
KEGG_AUTOIMMUNE_THYROID_DISEASE	3.36096e-23	6.25139e-21
KEGG_SYSTEMIC_LUPUS_ERYTHEMATOSUS	7.8774e-17	1.4652e-14
KEGG_ALLOGRAFT_REJECTION	1.6443e-22	3.0584e-20
KEGG_GRAFT_VERSUS_HOST_DISEASE	4.26463e-19	7.93222e-17
KEGG_PRIMARY_IMMUNODEFICIENCY	3.62462e-22	6.74178e-20
KEGG_HYPERTROPHIC_CARDIOMYOPATHY_HCM	1.24137e-07	2.30894e-05
KEGG_ARRHYTHMOGENIC_RIGHT_VENTRICULAR_CARDIOMYOPATHY_ARVC	0.257317	1
KEGG_DILATED_CARDIOMYOPATHY	5.88405e-05	0.0109443
KEGG_VIRAL_MYOCARDITIS	9.07095e-10	1.6872e-07
