# Supplementary material for: Integrating machine learning and bioinformatics analysis to m6A regulator-mediated methylation modification models for predicting glioblastoma patients’ prognosis and immunotherapy response
Source: Aging (Albany NY). 2023 May 23;15(10):4051–70. doi: 10.18632/aging.204495 (PMC10257999; doi:10.18632/aging.204495)
Supplement: Supplementary Table 8 [file aging-15-204495-s010.xls]

## Sheet: SupplementaryTable8_ssGSVA
Supplementary Table 8. ssGSVA.
TCGA-06-5858-01	TCGA-06-0221-02	TCGA-19-0957-02	TCGA-19-4065-01	TCGA-19-4065-02	TCGA-14-1402-02	TCGA-06-0211-02	TCGA-06-0210-02	TCGA-06-0190-02	TCGA-19-5960-01	TCGA-14-0736-02	TCGA-19-1389-02	TCGA-06-0125-02	TCGA-06-0152-02	TCGA-06-0171-02	CGGA_1001	CGGA_1007	CGGA_1011	CGGA_1015	CGGA_1019	CGGA_1023	CGGA_1024	CGGA_1026	CGGA_1035	CGGA_1039	CGGA_1045	CGGA_1049	CGGA_1072	CGGA_1077	CGGA_1078	CGGA_1083	CGGA_1091	CGGA_1109	CGGA_1124	CGGA_1139	CGGA_1171	CGGA_1177	CGGA_1180	CGGA_1188	CGGA_1214	CGGA_1216	CGGA_1218	CGGA_1224	CGGA_1234	CGGA_1237	CGGA_1240	CGGA_1251	CGGA_1258	CGGA_1270	CGGA_1271
Activated B cell	0.115352	0.102784	0.0649441	-0.0316774	0.00172758	-0.0116542	0.0811132	0.188319	-0.00827023	-0.0524965	0.104739	-0.117461	0.0554798	0.055015	0.26859	0.175273	0.132061	0.166439	0.0357488	0.0885239	0.00573449	-0.0179128	-0.00113398	-0.119552	0.065177	-0.0252129	-0.224175	-0.0184219	0.0869155	0.149326	0.152266	-0.00468951	0.0303876	0.152708	0.151279	0.216231	0.0771138	0.033435	0.223977	0.0228885	0.034812	0.144538	0.19387	0.147454	0.0421119	0.0823272	0.130358	0.100377	0.081732
Activated CD4 T cell	0.0677541	-0.0651451	-0.102989	-0.0518797	0.0211122	-0.0574424	-0.061367	-0.0333106	-0.0191574	-0.0399787	-0.0179592	-0.0669958	-0.0682979	0.0154067	0.0329983	-0.00955625	-0.112233	0.00279863	-0.0310451	-0.135436	-0.033626	-0.191487	-0.0311473	0.051438	0.0251944	0.0222518	-0.097738	0.107804	-0.0985949	-0.0486238	-0.114404	-0.151206	-0.150401	-0.0124233	-0.215509	0.033229	0.0510864	-0.0382309	-0.0970602	-0.0352861	-0.131251	-0.0695837	-0.0790275	-0.0294406	-0.0168706	-0.00841933	0.0408862	-0.108096	-0.0717886
Activated CD8 T cell	0.0501078	-0.0465492	0.0923392	0.0796327	0.00959389	0.115263	0.0772954	0.0811471	0.050793	0.00773457	0.11942	0.00560979	-0.0385796	-0.00417913	-0.0563999	-0.0172409	-0.0379123	0.0579643	0.0404598	0.0409381	-0.020181	0.0193149	-0.00106314	0.110047	0.106996	0.100127	-0.0796289	0.104514	0.140415	0.118181	-0.0102789	-0.0662229	0.0886395	0.141403	0.112718	0.0477013	0.136597	0.103592	0.0742294	-0.0215193	0.175018	0.00317471	0.0813968	0.131778	0.077181	0.118077	0.209512	0.151552	0.105959
Activated dendritic cell	0.253783	0.142821	0.22138	0.317588	0.329438	0.20929	0.32585	0.305277	0.328032	0.103522	0.251343	0.326922	0.240505	0.30449	0.357125	0.274239	0.199484	0.308423	0.316658	0.242795	0.178473	0.265151	0.2464	0.409271	0.231599	0.31156	0.351422	0.253978	0.261774	0.349288	0.318659	0.241522	0.239333	0.340292	0.164959	0.335237	0.389226	0.220929	0.171531	0.152252	0.270651	0.311939	0.292378	0.324174	0.30436	0.382756	0.241841	0.196253	0.28244
CD56bright natural killer cell	0.115341	0.0559308	0.204791	0.321843	0.231653	0.283555	0.265688	0.260953	0.220708	0.165368	0.271488	0.300787	0.242164	0.16239	0.211439	0.209018	0.240867	0.267967	0.217755	0.251213	0.152823	0.241203	0.141325	0.294496	0.145012	0.267689	0.294837	0.228212	0.253827	0.286346	0.248624	0.232832	0.175338	0.322116	0.156593	0.281607	0.270482	0.244443	0.163286	0.129737	0.278914	0.26585	0.290064	0.280018	0.23075	0.263217	0.175811	0.254984	0.2091
CD56dim natural killer cell	0.119627	-0.0192039	-0.0170812	0.0269186	0.165811	-0.0150813	0.0555761	0.118754	0.185154	-0.0346347	0.124928	0.0622078	0.0361919	0.0697356	0.132905	0.167659	0.107129	0.0416654	0.257008	0.165108	0.0683215	0.105202	-0.00522662	0.0960446	-0.064652	0.0654644	0.10445	-0.00784911	0.152471	0.00784746	0.154044	-0.00563842	0.0368703	0.124608	0.0573048	0.0591888	0.163842	0.0739621	0.106736	0.0496857	0.089482	0.00881701	0.152493	0.105579	-0.031121	0.19504	0.0271717	0.0863478	0.0812163
Central memory CD4 T cell	0.228501	0.0475934	0.237047	0.232371	0.27856	0.114466	0.228503	0.219516	0.305967	0.0605562	0.0799866	0.21447	0.209828	0.24093	0.273156	0.226915	0.182118	0.223727	0.258799	0.228686	0.166494	0.234589	0.170822	0.278527	0.0996333	0.274933	0.250411	0.150899	0.229631	0.116619	0.230058	0.233655	0.0831525	0.259289	0.0863375	0.235592	0.283747	0.175046	0.198159	0.137631	0.145324	0.233773	0.256657	0.276299	0.171884	0.296238	0.189192	0.143593	0.219977
Central memory CD8 T cell	0.142882	0.0472127	0.118828	0.13233	0.192625	0.0200184	0.0619693	0.158136	0.261297	0.0449536	-0.0246455	0.186686	0.116121	0.161866	0.205859	0.180588	0.101788	0.0731834	0.197663	0.134214	0.088161	0.152624	0.138406	0.171785	0.0787652	0.0886535	0.131951	0.122328	0.0969716	0.0753321	0.084745	0.218547	0.0804783	0.0514492	-0.0404606	0.0524828	0.218587	0.0174861	0.0541478	0.10886	0.0144802	0.129377	0.123799	0.114067	0.103401	0.150731	0.0966244	0.0531851	0.101484
Effector memeory CD4 T cell	0.114834	0.00416501	0.0522236	0.147794	0.0646015	0.119511	0.0657596	0.103327	0.151579	0.0133862	0.0510526	0.134763	0.0232818	0.0648122	0.185138	0.105658	0.0845216	0.214759	0.119426	0.036495	0.0504726	0.115773	0.148894	0.072571	0.0931254	0.132084	0.000779998	0.151092	0.101911	0.158807	0.155851	0.0701753	-0.024592	0.14075	0.0742943	0.164965	0.155269	0.0126081	-0.00921942	-0.0234087	-0.0645009	0.139408	0.107349	0.217759	0.134982	0.0884439	0.134667	-0.0706152	0.108271
Effector memeory CD8 T cell	0.133983	-0.0631727	0.192441	0.276119	0.23762	0.172605	0.280237	0.292908	0.376358	0.0299672	0.212935	0.287014	0.199646	0.352723	0.346159	0.373699	0.221289	0.352491	0.3867	0.212833	0.154123	0.217416	0.23569	0.331576	0.130582	0.27008	0.234147	0.218115	0.294298	0.332341	0.305229	0.168277	0.117322	0.283331	0.168222	0.306785	0.378372	0.203809	0.266401	0.131861	0.256442	0.292037	0.364082	0.315213	0.189209	0.320976	0.104308	0.228592	0.238983
Eosinophil	-0.332144	-0.221548	-0.184643	-0.0635279	-0.143707	-0.269948	-0.105726	-0.22222	-0.00273516	-0.319598	-0.00208865	-0.110671	-0.0890247	-0.0497205	0.0725827	0.203177	-0.148085	0.179483	0.109482	-0.21237	-0.125695	-0.419852	-0.41628	-0.225561	-0.327009	-0.122184	-0.0530259	-0.317846	-0.235981	-0.0491304	-0.0438968	-0.233081	-0.210738	-0.0666433	0.022876	-0.0624337	-0.0311135	-0.06065	0.0188278	-0.182193	-0.14446	-0.165209	0.149253	-0.16932	-0.274916	-0.17231	-0.195939	-0.136845	-0.164995
Gamma delta T cell	0.199682	0.0942158	0.127712	0.25155	0.207302	0.148648	0.213826	0.232257	0.22056	0.175851	0.225209	0.198171	0.099867	0.185998	0.214234	0.223687	0.221196	0.217202	0.238553	0.207109	0.104818	0.150792	0.17247	0.237307	0.207675	0.19595	0.246914	0.2569	0.200251	0.152929	0.183824	0.2361	0.0761005	0.278068	0.0346545	0.244141	0.311119	0.222347	0.135093	0.236048	0.118635	0.178642	0.282012	0.184398	0.225391	0.26894	0.187698	0.192111	0.163626
Immature B cell	0.0612832	-0.115627	0.176211	0.101464	-0.0337839	0.0377351	0.124764	0.249848	0.146106	-0.04376	0.15752	0.198728	0.0788896	0.117146	0.374529	0.284232	0.0629461	0.289863	0.286186	0.166285	0.0523069	0.0859342	0.167259	0.30504	-0.159547	0.118714	0.0733963	0.140225	0.127787	0.339522	0.256196	0.0815787	0.129237	0.245544	0.0349265	0.254385	0.229162	0.0688809	0.103607	0.0596234	0.0574533	0.282716	0.210135	0.236949	0.0292576	0.181454	-0.0240984	0.103208	0.129184
Immature dendritic cell	0.134476	0.12053	0.185006	0.235056	0.194276	0.160904	0.184428	0.216772	0.122909	0.100312	0.198903	0.188244	0.177211	0.132563	0.203841	0.169606	0.157199	0.201969	0.0885867	0.157791	0.160713	0.199778	0.212809	0.220358	0.16227	0.158294	0.239716	0.214322	0.0871811	0.243634	0.170582	0.163411	0.164876	0.213171	0.215437	0.238042	0.159797	0.155656	0.0929822	0.220044	0.189065	0.233971	0.118319	0.199581	0.0935092	0.212369	0.0901999	0.109919	0.147781
Macrophage	0.234795	0.0485531	0.244091	0.330955	0.274514	0.1734	0.273284	0.322128	0.361617	0.146247	0.235076	0.349052	0.21039	0.263458	0.448154	0.441328	0.21135	0.348543	0.415737	0.308787	0.134826	0.211194	0.240418	0.322795	0.196873	0.312045	0.279883	0.299211	0.344982	0.307636	0.379061	0.280006	0.220876	0.381384	0.229756	0.392646	0.420869	0.298703	0.238957	0.199001	0.231528	0.32733	0.434623	0.306853	0.207576	0.369717	0.188802	0.295573	0.348619
Mast cell	0.101708	-0.0745464	0.147418	0.21753	0.175329	0.00813725	0.121739	0.198041	0.363812	-0.239423	0.0993736	0.205055	0.204045	0.0343904	0.506624	0.436487	0.116561	0.403118	0.272958	0.278942	0.149783	-0.0396622	0.0661175	0.325021	-0.0942468	0.172679	0.152683	-0.103928	0.169096	0.161674	0.31635	0.0712103	0.111775	0.33712	-0.0622828	0.237166	0.404673	0.0319912	0.0332684	-0.0212813	-0.059515	0.231051	0.417926	0.222607	0.0563458	0.279368	-0.0313007	0.0178247	0.186299
MDSC	0.232744	-0.108484	0.214678	0.351471	0.314724	0.143099	0.344081	0.394371	0.38598	-0.116288	0.276318	0.383091	0.189985	0.32342	0.484339	0.485107	0.206293	0.410117	0.449519	0.391669	0.18823	0.196342	0.308835	0.402619	-0.026393	0.378039	0.268382	0.259831	0.374757	0.370131	0.429147	0.262891	0.110959	0.43233	0.211823	0.440273	0.454493	0.268848	0.280281	0.127339	0.214649	0.364571	0.483468	0.351094	0.176966	0.39472	0.175499	0.292159	0.324129
Memory B cell	-0.222364	-0.0414239	-0.0968986	-0.230931	-0.213027	-0.208625	-0.163212	-0.168644	-0.22458	-0.0343409	-0.186325	-0.0936505	-0.073086	-0.166142	0.0154226	-0.0528056	-0.0913079	-0.0299265	-0.174689	-0.214731	-0.22254	-0.253663	-0.151945	-0.122927	-0.0750961	-0.24966	-0.15387	-0.184481	-0.298112	-0.0550976	-0.114601	-0.121477	-0.149499	-0.199167	-0.187669	-0.106371	-0.162181	-0.271923	-0.252076	-0.144533	-0.128069	-0.149385	-0.0551735	-0.180183	-0.236915	-0.080263	-0.149849	-0.198378	-0.270297
Monocyte	0.232711	0.217644	0.230125	0.199574	0.260711	0.142534	0.213599	0.252309	0.179971	0.0589665	0.180308	0.133666	0.235959	0.223716	0.287931	0.249125	0.272682	0.204241	0.176343	0.231988	0.178126	0.216566	0.143988	0.198002	0.272068	0.210141	0.143054	0.13884	0.242035	0.232936	0.228112	0.228871	0.15232	0.232119	0.167578	0.242685	0.290148	0.220737	0.230966	0.195335	0.147625	0.251539	0.227113	0.196409	0.160203	0.267882	0.198773	0.200985	0.25862
Natural killer cell	0.188465	0.0456921	0.17151	0.100286	0.139849	-0.00165696	0.147385	0.21831	0.286991	-0.0590062	0.0433368	0.213134	0.2056	0.121517	0.288307	0.219052	0.265934	0.168573	0.247065	0.0196602	-0.0700098	0.174335	0.178293	0.250357	0.0362257	0.159685	0.26509	0.111468	0.124129	0.19497	0.244715	0.0795921	0.0843055	0.220814	0.0680821	0.202461	0.247838	0.166237	0.0241684	0.179194	0.188121	0.176962	0.176864	0.172177	0.100852	0.232653	0.0215336	0.155249	0.0674084
Natural killer T cell	0.122697	0.0140142	0.167732	0.0463559	0.13782	0.0208744	0.150972	0.163771	0.179511	0.11526	0.0894051	0.136949	0.135886	0.104173	0.189977	0.159248	0.183665	0.122376	0.177328	0.106634	0.0743804	0.110505	0.189913	0.150706	0.148022	0.150798	0.166896	0.141856	0.128556	0.16679	0.11676	0.107935	0.136206	0.163171	0.0702219	0.195064	0.180112	0.113524	0.106747	0.0611163	0.12705	0.169808	0.127301	0.0724186	0.0590626	0.156054	0.0777707	0.0754695	0.161138
Neutrophil	-0.147053	-0.000831933	0.108139	0.0736008	0.0600399	-0.0531874	0.204317	0.146286	0.0530609	0.04859	0.160613	0.168676	0.00264788	0.320887	0.432535	0.205812	0.445807	0.24763	0.197403	0.190051	0.21942	0.10998	0.429202	0.198239	0.00282547	0.142079	0.00154417	-0.0852938	0.346774	0.134856	0.363859	0.0700512	0.307747	0.174158	0.120974	0.23909	0.349152	0.220091	0.346054	0.271649	0.246	0.025296	0.253732	0.111646	0.000760337	0.305584	0.0153069	0.288521	0.193061
Plasmacytoid dendritic cell	0.0977839	0.0669975	0.101764	0.193307	0.190213	0.101929	0.117179	0.188114	0.289811	0.0722445	0.0620857	0.206717	0.118259	0.149607	0.278479	0.191583	0.12065	0.260574	0.285006	0.144816	0.0471129	0.0739661	0.170154	0.275071	0.0880427	0.107548	0.179486	0.111503	0.132832	0.217168	0.266572	0.118027	0.143045	0.179237	0.102747	0.218802	0.209892	0.0110398	0.0938548	0.074856	0.102199	0.17726	0.183246	0.303014	0.0539236	0.234283	0.10345	0.0660215	0.131228
Regulatory T cell	0.112805	0.0521445	0.130632	0.236628	0.204137	0.0602621	0.139293	0.18372	0.312825	-0.21618	0.152616	0.298573	0.0277213	0.100191	0.299833	0.33176	0.0812759	0.180004	0.323099	0.219617	0.0450643	0.114684	0.1006	0.340996	-0.0778141	0.295358	0.212911	0.0976837	0.282054	0.188571	0.271232	0.202894	0.0540595	0.298414	0.0253908	0.259302	0.343546	0.188496	0.141257	0.0197145	0.0616531	0.222619	0.293426	0.243384	0.103222	0.347538	0.134835	0.173187	0.214802
T follicular helper cell	0.231007	0.151661	0.249055	0.271489	0.237768	0.12656	0.324158	0.353428	0.247963	0.111068	0.256605	0.347183	0.215746	0.284405	0.392858	0.375716	0.218444	0.352121	0.269475	0.279538	0.167201	0.231696	0.225567	0.248485	0.130234	0.286338	0.267971	0.170681	0.232017	0.276501	0.281058	0.235398	0.203816	0.342549	0.215842	0.356082	0.360093	0.257803	0.242246	0.205328	0.182483	0.326171	0.322629	0.300587	0.222241	0.35175	0.252127	0.264097	0.332269
Type 1 T helper cell	0.0921865	-0.0999625	0.081482	0.200167	0.215356	0.103123	0.14544	0.185191	0.243128	-0.0848534	0.132379	0.268754	0.117495	0.174636	0.29624	0.25772	0.0594217	0.213525	0.250398	0.163373	0.0310932	0.161215	0.0736	0.273002	-0.0135324	0.252926	0.1803	0.0876808	0.265998	0.1478	0.224721	0.143062	0.0476908	0.304653	0.109282	0.269247	0.348183	0.172495	0.127961	0.0916937	0.142733	0.208408	0.297758	0.231379	0.126741	0.270725	0.0384765	0.137339	0.20857
Type 17 T helper cell	-0.00485266	-0.0159383	0.0337928	0.0733871	0.0714033	-0.0015141	0.0779447	0.0728067	-0.00201914	-0.0210756	0.0517373	0.0861457	0.00474405	0.0470391	0.0881941	0.048856	0.114588	0.134355	-0.0077671	0.0517902	0.10252	-0.0605309	0.0152485	0.03049	0.00639394	0.103947	0.049071	-0.0226233	0.111745	0.131102	0.103759	-0.0306708	0.0335163	0.0615128	0.0655425	0.119199	0.164473	0.0286602	0.139287	-0.0034949	0.0240222	0.0346024	0.119615	0.0847284	0.0170796	0.0742491	0.0585207	0.111964	0.122757
Type 2 T helper cell	0.0786126	0.110506	0.0827872	0.0336254	0.0958512	0.0343912	0.0398585	0.0762531	0.180198	0.0717237	-0.0494176	0.0535773	0.0750577	0.105935	0.0703166	0.0426922	0.127722	0.0851779	0.108958	0.0128811	-0.0239672	0.0841641	0.0657077	0.0172106	0.0561787	0.00156343	0.013779	0.140106	-0.0715742	0.0690373	0.042715	0.0900615	0.116342	0.0403136	-0.100634	0.0406693	0.0519078	0.0518022	-0.108916	0.117728	-0.0710041	0.0651393	-0.014505	0.100465	0.0952721	0.0420643	0.0559678	0.0306717	-0.0447594
[truncated: 206 more columns]
