# Supplementary material for: Integrating machine learning and bioinformatics analysis to m6A regulator-mediated methylation modification models for predicting glioblastoma patients’ prognosis and immunotherapy response
Source: Aging (Albany NY). 2023 May 23;15(10):4051–70. doi: 10.18632/aging.204495 (PMC10257999; doi:10.18632/aging.204495)
Supplement: Supplementary Table 9 [file aging-15-204495-s011.xls]

## Sheet: SupplementaryTable9_TCGA_anno
Supplementary Table 9. TCGA_anno.
sample	IDH1	EGFR	TP53	cancer_type	age	gender	cluster
TCGA-02-0003-01	WT	Mut	Mut	Glioblastoma Multiforme	50	Male	m6AclusterA
TCGA-02-0033-01	WT	WT	Mut	Glioblastoma Multiforme	54	Male	m6AclusterB
TCGA-02-0047-01	WT	WT	WT	Glioblastoma Multiforme	78	Male	m6AclusterA
TCGA-02-0055-01	WT	WT	Mut	Glioblastoma Multiforme	62	Female	m6AclusterB
TCGA-02-2466-01	WT	Mut	WT	Glioblastoma Multiforme	61	Male	m6AclusterA
TCGA-02-2470-01	WT	WT	WT	Glioblastoma Multiforme	57	Male	m6AclusterB
TCGA-02-2483-01	Mut	WT	Mut	Glioblastoma Multiforme	43	Male	m6AclusterB
TCGA-02-2485-01	WT	Mut	Mut	Glioblastoma Multiforme	53	Male	m6AclusterA
TCGA-02-2486-01	WT	WT	WT	Glioblastoma Multiforme	64	Male	m6AclusterB
TCGA-06-0122-01	WT	WT	WT	Glioblastoma Multiforme	84	Female	m6AclusterB
TCGA-06-0124-01	WT	WT	WT	Glioblastoma Multiforme	67	Male	m6AclusterB
TCGA-06-0125-01	WT	Mut	WT	Glioblastoma Multiforme	63	Female	m6AclusterA
TCGA-06-0125-02	WT	Mut	WT	Glioblastoma Multiforme	63	Female	m6AclusterB
TCGA-06-0126-01	WT	WT	WT	Glioblastoma Multiforme	86	Male	m6AclusterA
TCGA-06-0128-01	Mut	WT	Mut	Glioblastoma Multiforme	66	Male	m6AclusterB
TCGA-06-0129-01	Mut	WT	Mut	Glioblastoma Multiforme	30	Male	m6AclusterA
TCGA-06-0130-01	WT	WT	Mut	Glioblastoma Multiforme	54	Male	m6AclusterA
TCGA-06-0132-01	WT	Mut	WT	Glioblastoma Multiforme	49	Male	m6AclusterB
TCGA-06-0137-01	WT	Mut	WT	Glioblastoma Multiforme	63	Female	m6AclusterB
TCGA-06-0139-01	WT	WT	WT	Glioblastoma Multiforme	40	Male	m6AclusterB
TCGA-06-0140-01	WT	WT	WT	Glioblastoma Multiforme	86	Male	m6AclusterA
TCGA-06-0141-01	WT	WT	WT	Glioblastoma Multiforme	62	Male	m6AclusterB
TCGA-06-0142-01	WT	Mut	WT	Glioblastoma Multiforme	81	Male	m6AclusterB
TCGA-06-0145-01	WT	Mut	WT	Glioblastoma Multiforme	53	Female	m6AclusterB
TCGA-06-0151-01	WT	WT	WT	Glioblastoma Multiforme	32	Female	m6AclusterB
TCGA-06-0152-01	WT	Mut	WT	Glioblastoma Multiforme	68	Male	m6AclusterB
TCGA-06-0152-02	WT	Mut	Mut	Glioblastoma Multiforme	68	Male	m6AclusterA
TCGA-06-0154-01	WT	Mut	WT	Glioblastoma Multiforme	54	Male	m6AclusterB
TCGA-06-0157-01	WT	Mut	WT	Glioblastoma Multiforme	63	Female	m6AclusterA
TCGA-06-0158-01	WT	Mut	WT	Glioblastoma Multiforme	73	Male	m6AclusterA
TCGA-06-0165-01	WT	WT	WT	Glioblastoma Multiforme	52	Male	m6AclusterB
TCGA-06-0166-01	WT	WT	WT	Glioblastoma Multiforme	51	Male	m6AclusterA
TCGA-06-0168-01	WT	WT	WT	Glioblastoma Multiforme	59	Female	m6AclusterB
TCGA-06-0169-01	WT	WT	WT	Glioblastoma Multiforme	68	Male	m6AclusterB
TCGA-06-0171-01	WT	WT	WT	Glioblastoma Multiforme	65	Male	m6AclusterB
TCGA-06-0171-02	WT	Mut	WT	Glioblastoma Multiforme	65	Male	m6AclusterB
TCGA-06-0173-01	WT	WT	WT	Glioblastoma Multiforme	72	Female	m6AclusterA
TCGA-06-0174-01	WT	Mut	WT	Glioblastoma Multiforme	54	Male	m6AclusterA
TCGA-06-0178-01	WT	WT	WT	Glioblastoma Multiforme	38	Male	m6AclusterB
TCGA-06-0184-01	WT	WT	Mut	Glioblastoma Multiforme	63	Male	m6AclusterA
TCGA-06-0185-01	WT	WT	WT	Glioblastoma Multiforme	54	Male	m6AclusterA
TCGA-06-0187-01	WT	WT	WT	Glioblastoma Multiforme	69	Male	m6AclusterA
TCGA-06-0188-01	WT	WT	Mut	Glioblastoma Multiforme	71	Male	m6AclusterA
TCGA-06-0189-01	WT	WT	Mut	Glioblastoma Multiforme	55	Male	m6AclusterB
TCGA-06-0190-01	WT	WT	Mut	Glioblastoma Multiforme	62	Male	m6AclusterA
TCGA-06-0190-02	WT	WT	Mut	Glioblastoma Multiforme	62	Male	m6AclusterB
TCGA-06-0209-01	WT	WT	WT	Glioblastoma Multiforme	76	Male	m6AclusterB
TCGA-06-0210-02	WT	WT	Mut	Glioblastoma Multiforme	72	Female	m6AclusterA
TCGA-06-0211-02	WT	Mut	WT	Glioblastoma Multiforme	47	Male	m6AclusterB
TCGA-06-0213-01	WT	WT	WT	Glioblastoma Multiforme	55	Female	m6AclusterB
TCGA-06-0214-01	WT	WT	WT	Glioblastoma Multiforme	66	Male	m6AclusterA
TCGA-06-0219-01	WT	WT	WT	Glioblastoma Multiforme	67	Male	m6AclusterB
TCGA-06-0221-01	Mut	WT	Mut	Glioblastoma Multiforme	31	Male	m6AclusterB
TCGA-06-0221-02	Mut	WT	Mut	Glioblastoma Multiforme	31	Male	m6AclusterA
TCGA-06-0237-01	WT	Mut	Mut	Glioblastoma Multiforme	75	Female	m6AclusterA
TCGA-06-0238-01	WT	WT	Mut	Glioblastoma Multiforme	46	Male	m6AclusterB
TCGA-06-0240-01	WT	WT	WT	Glioblastoma Multiforme	57	Male	m6AclusterB
TCGA-06-0241-01	WT	WT	Mut	Glioblastoma Multiforme	65	Female	m6AclusterA
TCGA-06-0644-01	WT	WT	Mut	Glioblastoma Multiforme	71	Male	m6AclusterB
TCGA-06-0645-01	WT	WT	WT	Glioblastoma Multiforme	55	Female	m6AclusterB
TCGA-06-0646-01	WT	WT	WT	Glioblastoma Multiforme	60	Male	m6AclusterB
TCGA-06-0648-01	WT	WT	Mut	Glioblastoma Multiforme	77	Male	m6AclusterA
TCGA-06-0650-01	WT	Mut	WT	Glioblastoma Multiforme	39	Female	m6AclusterB
TCGA-06-0686-01	WT	WT	WT	Glioblastoma Multiforme	53	Male	m6AclusterA
TCGA-06-0743-01	WT	Mut	Mut	Glioblastoma Multiforme	69	Male	m6AclusterB
TCGA-06-0744-01	WT	WT	Mut	Glioblastoma Multiforme	66	Male	m6AclusterB
TCGA-06-0745-01	WT	WT	WT	Glioblastoma Multiforme	59	Male	m6AclusterB
TCGA-06-0747-01	WT	WT	WT	Glioblastoma Multiforme	53	Male	m6AclusterA
TCGA-06-0749-01	WT	Mut	WT	Glioblastoma Multiforme	50	Male	m6AclusterB
TCGA-06-0750-01	WT	Mut	WT	Glioblastoma Multiforme	43	Male	m6AclusterB
TCGA-06-0875-01	WT	WT	Mut	Glioblastoma Multiforme	61	Female	m6AclusterA
TCGA-06-0876-01	WT	Mut	Mut	Glioblastoma Multiforme	72	Female	m6AclusterB
TCGA-06-0878-01	WT	Mut	WT	Glioblastoma Multiforme	74	Male	m6AclusterA
TCGA-06-0879-01	WT	Mut	WT	Glioblastoma Multiforme	52	Male	m6AclusterB
TCGA-06-0881-01	WT	Mut	Mut	Glioblastoma Multiforme	50	Male	m6AclusterB
TCGA-06-0882-01	WT	WT	WT	Glioblastoma Multiforme	30	Male	m6AclusterB
TCGA-06-0939-01	WT	WT	WT	Glioblastoma Multiforme	79	Female	m6AclusterB
TCGA-06-1084-01	WT	Mut	WT	Glioblastoma Multiforme	54	Male	m6AclusterB
TCGA-06-1087-01	WT	WT	Mut	Glioblastoma Multiforme	75	Male	m6AclusterA
TCGA-06-1800-01	WT	Mut	Mut	Glioblastoma Multiforme	61	Male	m6AclusterA
TCGA-06-1801-01	WT	Mut	WT	Glioblastoma Multiforme	56	Female	m6AclusterA
TCGA-06-1802-01	WT	WT	WT	Glioblastoma Multiforme	61	Male	m6AclusterB
TCGA-06-1804-01	WT	Mut	WT	Glioblastoma Multiforme	81	Female	m6AclusterA
TCGA-06-1805-01	Mut	WT	Mut	Glioblastoma Multiforme	28	Female	m6AclusterA
TCGA-06-2557-01	WT	Mut	WT	Glioblastoma Multiforme	76	Male	m6AclusterA
TCGA-06-2558-01	WT	WT	Mut	Glioblastoma Multiforme	75	Female	m6AclusterB
TCGA-06-2559-01	WT	WT	Mut	Glioblastoma Multiforme	83	Male	m6AclusterB
TCGA-06-2561-01	WT	Mut	WT	Glioblastoma Multiforme	53	Female	m6AclusterA
TCGA-06-2562-01	WT	WT	WT	Glioblastoma Multiforme	81	Male	m6AclusterA
TCGA-06-2563-01	WT	Mut	Mut	Glioblastoma Multiforme	72	Female	m6AclusterA
TCGA-06-2564-01	WT	WT	WT	Glioblastoma Multiforme	50	Male	m6AclusterA
TCGA-06-2565-01	WT	Mut	WT	Glioblastoma Multiforme	59	Male	m6AclusterA
TCGA-06-2566-01	WT	WT	WT	Glioblastoma Multiforme	23	Female	m6AclusterB
TCGA-06-2567-01	WT	Mut	Mut	Glioblastoma Multiforme	65	Male	m6AclusterA
TCGA-06-2569-01	WT	WT	Mut	Glioblastoma Multiforme	24	Female	m6AclusterA
TCGA-06-2570-01	Mut	WT	Mut	Glioblastoma Multiforme	21	Female	m6AclusterA
TCGA-06-5408-01	WT	WT	Mut	Glioblastoma Multiforme	54	Female	m6AclusterA
TCGA-06-5410-01	WT	WT	WT	Glioblastoma Multiforme	72	Female	m6AclusterB
TCGA-06-5411-01	WT	WT	WT	Glioblastoma Multiforme	51	Male	m6AclusterB
TCGA-06-5412-01	WT	WT	WT	Glioblastoma Multiforme	78	Female	m6AclusterB
TCGA-06-5413-01	WT	Mut	WT	Glioblastoma Multiforme	67	Male	m6AclusterA
TCGA-06-5414-01	WT	WT	WT	Glioblastoma Multiforme	61	Male	m6AclusterA
TCGA-06-5415-01	WT	WT	WT	Glioblastoma Multiforme	60	Male	m6AclusterA
TCGA-06-5416-01	WT	Mut	Mut	Glioblastoma Multiforme	23	Female	m6AclusterA
TCGA-06-5417-01	Mut	WT	Mut	Glioblastoma Multiforme	45	Female	m6AclusterA
TCGA-06-5418-01	WT	WT	WT	Glioblastoma Multiforme	75	Female	m6AclusterB
TCGA-06-5856-01	WT	Mut	WT	Glioblastoma Multiforme	58	Male	m6AclusterA
TCGA-06-5858-01	WT	WT	Mut	Glioblastoma Multiforme	45	Female	m6AclusterA
TCGA-06-5859-01	WT	WT	WT	Glioblastoma Multiforme	63	Male	m6AclusterA
TCGA-06-6388-01	WT	WT	WT	Glioblastoma Multiforme	64	Female	m6AclusterA
TCGA-06-6389-01	Mut	WT	Mut	Glioblastoma Multiforme	49	Female	m6AclusterA
TCGA-06-6390-01	WT	WT	WT	Glioblastoma Multiforme	58	Male	m6AclusterA
TCGA-06-6391-01	WT	WT	WT	Glioblastoma Multiforme	44	Female	m6AclusterA
TCGA-06-6693-01	WT	WT	WT	Glioblastoma Multiforme	64	Female	m6AclusterA
TCGA-06-6694-01	WT	WT	Mut	Glioblastoma Multiforme	76	Female	m6AclusterA
TCGA-06-6695-01	WT	Mut	WT	Glioblastoma Multiforme	64	Male	m6AclusterA
TCGA-06-6697-01	WT	WT	WT	Glioblastoma Multiforme	65	Male	m6AclusterA
TCGA-06-6698-01	WT	WT	Mut	Glioblastoma Multiforme	53	Female	m6AclusterA
TCGA-06-6699-01	WT	WT	WT	Glioblastoma Multiforme	58	Female	m6AclusterA
TCGA-06-6700-01	WT	WT	WT	Glioblastoma Multiforme	76	Male	m6AclusterB
TCGA-06-6701-01	Mut	WT	Mut	Glioblastoma Multiforme	60	Male	m6AclusterA
TCGA-08-0386-01	WT	WT	WT	Glioblastoma Multiforme	74	Male	m6AclusterA
TCGA-12-0615-01	WT	WT	WT	Glioblastoma Multiforme	78	Female	m6AclusterB
TCGA-12-0616-01	WT	Mut	WT	Glioblastoma Multiforme	36	Female	m6AclusterB
TCGA-12-0618-01	WT	WT	Mut	Glioblastoma Multiforme	49	Male	m6AclusterA
TCGA-12-0619-01	WT	Mut	Mut	Glioblastoma Multiforme	60	Male	m6AclusterB
TCGA-12-0656-01	WT	Mut	WT	Glioblastoma Multiforme	48	Female	m6AclusterB
TCGA-12-0657-01	WT	Mut	WT	Glioblastoma Multiforme	69	Male	m6AclusterA
TCGA-12-0662-01	WT	WT	Mut	Glioblastoma Multiforme	51	Male	m6AclusterB
TCGA-12-0688-01	WT	WT	WT	Glioblastoma Multiforme	74	Male	m6AclusterB
TCGA-12-0691-01	WT	Mut	Mut	Glioblastoma Multiforme	63	Male	m6AclusterA
TCGA-12-0692-01	WT	WT	WT	Glioblastoma Multiforme	75	Female	m6AclusterA
TCGA-12-0707-01	WT	Mut	Mut	Glioblastoma Multiforme	55	Male	m6AclusterB
TCGA-12-0772-01	WT	WT	WT	Glioblastoma Multiforme	46	Male	m6AclusterB
TCGA-12-0773-01	WT	WT	Mut	Glioblastoma Multiforme	24	Male	m6AclusterB
TCGA-12-0775-01	WT	Mut	Mut	Glioblastoma Multiforme	75	Female	m6AclusterB
TCGA-12-0778-01	WT	WT	WT	Glioblastoma Multiforme	53	Male	m6AclusterB
TCGA-12-0818-01	Mut	Mut	Mut	Glioblastoma Multiforme	45	Female	m6AclusterB
TCGA-12-0819-01	WT	Mut	WT	Glioblastoma Multiforme	49	Female	m6AclusterB
TCGA-12-0820-01	WT	WT	WT	Glioblastoma Multiforme	40	Male	m6AclusterA
TCGA-12-0821-01	Mut	Mut	WT	Glioblastoma Multiforme	62	Male	m6AclusterA
TCGA-12-0822-01	Mut	WT	WT	Glioblastoma Multiforme	46	Male	m6AclusterB
TCGA-12-0826-01	WT	WT	WT	Glioblastoma Multiforme	38	Female	m6AclusterB
TCGA-12-0827-01	Mut	WT	Mut	Glioblastoma Multiforme	38	Female	m6AclusterB
TCGA-12-0828-01	WT	WT	WT	Glioblastoma Multiforme	57	Male	m6AclusterB
TCGA-12-0829-01	WT	Mut	WT	Glioblastoma Multiforme	75	Male	m6AclusterB
TCGA-12-1088-01	WT	WT	Mut	Glioblastoma Multiforme	53	Female	m6AclusterB
TCGA-12-1089-01	WT	WT	WT	Glioblastoma Multiforme	64	Male	m6AclusterB
TCGA-12-1093-01	WT	WT	WT	Glioblastoma Multiforme	66	Female	m6AclusterB
TCGA-12-1598-01	WT	Mut	Mut	Glioblastoma Multiforme	75	Female	m6AclusterB
TCGA-12-1599-01	WT	WT	WT	Glioblastoma Multiforme	47	Female	m6AclusterB
TCGA-12-1600-01	WT	Mut	Mut	Glioblastoma Multiforme	86	Male	m6AclusterA
TCGA-12-1602-01	WT	WT	WT	Glioblastoma Multiforme	58	Male	m6AclusterB
TCGA-12-3644-01	WT	WT	Mut	Glioblastoma Multiforme	47	Female	m6AclusterB
TCGA-12-3646-01	WT	WT	WT	Glioblastoma Multiforme	59	Female	m6AclusterA
TCGA-12-3648-01	WT	WT	WT	Glioblastoma Multiforme	61	Female	m6AclusterA
TCGA-12-3649-01	WT	WT	WT	Glioblastoma Multiforme	76	Male	m6AclusterB
TCGA-12-3650-01	WT	Mut	WT	Glioblastoma Multiforme	46	Male	m6AclusterA
TCGA-12-3651-01	WT	WT	WT	Glioblastoma Multiforme	77	Male	m6AclusterB
TCGA-12-3652-01	WT	Mut	WT	Glioblastoma Multiforme	60	Male	m6AclusterA
TCGA-12-3653-01	WT	WT	WT	Glioblastoma Multiforme	34	Female	m6AclusterA
TCGA-12-5295-01	WT	WT	WT	Glioblastoma Multiforme	60	Female	m6AclusterB
TCGA-12-5299-01	WT	WT	WT	Glioblastoma Multiforme	56	Female	m6AclusterA
TCGA-12-5301-01	WT	WT	WT	Glioblastoma Multiforme	59	Male	m6AclusterB
TCGA-14-0736-01	WT	WT	WT	Glioblastoma Multiforme	49	Male	m6AclusterB
TCGA-14-0736-02	WT	WT	WT	Glioblastoma Multiforme	49	Male	m6AclusterB
TCGA-14-0787-01	WT	WT	WT	Glioblastoma Multiforme	69	Male	m6AclusterA
TCGA-14-0789-01	WT	WT	Mut	Glioblastoma Multiforme	54	Male	m6AclusterB
TCGA-14-0813-01	WT	Mut	Mut	Glioblastoma Multiforme	78	Male	m6AclusterB
TCGA-14-0817-01	WT	WT	Mut	Glioblastoma Multiforme	69	Female	m6AclusterB
TCGA-14-0867-01	WT	WT	Mut	Glioblastoma Multiforme	67	Male	m6AclusterA
TCGA-14-0871-01	WT	Mut	Mut	Glioblastoma Multiforme	74	Female	m6AclusterA
TCGA-14-1034-01	WT	Mut	Mut	Glioblastoma Multiforme	60	Female	m6AclusterA
TCGA-14-1037-01	WT	WT	WT	Glioblastoma Multiforme	66	Female	m6AclusterA
TCGA-14-1396-01	WT	WT	Mut	Glioblastoma Multiforme	78	Female	m6AclusterB
TCGA-14-1451-01	WT	WT	WT	Glioblastoma Multiforme	39	Male	m6AclusterB
TCGA-14-1453-01	WT	WT	WT	Glioblastoma Multiforme	69	Male	m6AclusterB
TCGA-14-1455-01	WT	Mut	WT	Glioblastoma Multiforme	61	Male	m6AclusterA
TCGA-14-1458-01	Mut	WT	Mut	Glioblastoma Multiforme	54	Male	m6AclusterA
TCGA-14-1794-01	WT	Mut	Mut	Glioblastoma Multiforme	59	Male	m6AclusterB
TCGA-14-1795-01	WT	WT	Mut	Glioblastoma Multiforme	66	Male	m6AclusterA
TCGA-14-1821-01	Mut	WT	Mut	Glioblastoma Multiforme	31	Male	m6AclusterA
TCGA-14-1823-01	WT	Mut	WT	Glioblastoma Multiforme	58	Female	m6AclusterB
TCGA-14-1825-01	WT	WT	Mut	Glioblastoma Multiforme	70	Male	m6AclusterA
TCGA-14-1827-01	WT	Mut	WT	Glioblastoma Multiforme	51	Male	m6AclusterB
TCGA-14-1829-01	WT	Mut	WT	Glioblastoma Multiforme	57	Male	m6AclusterB
TCGA-14-2554-01	WT	Mut	WT	Glioblastoma Multiforme	52	Female	m6AclusterB
TCGA-14-3477-01	WT	WT	Mut	Glioblastoma Multiforme	38	Female	m6AclusterA
TCGA-14-4157-01	Mut	WT	Mut	Glioblastoma Multiforme	40	Male	m6AclusterA
TCGA-15-0742-01	WT	Mut	WT	Glioblastoma Multiforme	65	Male	m6AclusterA
TCGA-15-1444-01	Mut	WT	Mut	Glioblastoma Multiforme	21	Male	m6AclusterA
TCGA-15-1446-01	Mut	WT	WT	Glioblastoma Multiforme	55	Male	m6AclusterA
TCGA-16-0846-01	WT	Mut	Mut	Glioblastoma Multiforme	85	Male	m6AclusterB
TCGA-16-0848-01	WT	Mut	Mut	Glioblastoma Multiforme	57	Male	m6AclusterB
TCGA-16-0849-01	WT	Mut	Mut	Glioblastoma Multiforme	54	Male	m6AclusterB
TCGA-16-0850-01	Mut	WT	Mut	Glioblastoma Multiforme	52	Female	m6AclusterA
TCGA-16-1460-01	Mut	WT	Mut	Glioblastoma Multiforme	36	Female	m6AclusterA
TCGA-19-0957-02	WT	WT	WT	Glioblastoma Multiforme	48	Female	m6AclusterA
TCGA-19-1385-01	WT	WT	WT	Glioblastoma Multiforme	69	Male	m6AclusterA
TCGA-19-1386-01	WT	Mut	WT	Glioblastoma Multiforme	51	Male	m6AclusterA
TCGA-19-1387-01	WT	WT	WT	Glioblastoma Multiforme	81	Male	m6AclusterA
TCGA-19-1388-01	WT	Mut	Mut	Glioblastoma Multiforme	58	Male	m6AclusterA
TCGA-19-1389-01	WT	WT	WT	Glioblastoma Multiforme	51	Male	m6AclusterB
TCGA-19-1389-02	WT	WT	WT	Glioblastoma Multiforme	51	Male	m6AclusterB
TCGA-19-1390-01	WT	WT	Mut	Glioblastoma Multiforme	63	Female	m6AclusterA
TCGA-19-1786-01	WT	WT	WT	Glioblastoma Multiforme	64	Female	m6AclusterA
TCGA-19-1788-01	Mut	WT	Mut	Glioblastoma Multiforme	39	Male	m6AclusterA
TCGA-19-1789-01	WT	Mut	WT	Glioblastoma Multiforme	69	Female	m6AclusterA
TCGA-19-1791-01	WT	WT	WT	Glioblastoma Multiforme	82	Female	m6AclusterA
TCGA-19-2619-01	WT	WT	WT	Glioblastoma Multiforme	55	Female	m6AclusterA
TCGA-19-2620-01	WT	Mut	WT	Glioblastoma Multiforme	70	Male	m6AclusterA
TCGA-19-2623-01	WT	WT	Mut	Glioblastoma Multiforme	65	Male	m6AclusterB
TCGA-19-2624-01	WT	Mut	WT	Glioblastoma Multiforme	51	Male	m6AclusterA
TCGA-19-2625-01	WT	WT	Mut	Glioblastoma Multiforme	76	Female	m6AclusterB
TCGA-19-2629-01	Mut	WT	Mut	Glioblastoma Multiforme	60	Male	m6AclusterA
TCGA-19-2631-01	WT	WT	WT	Glioblastoma Multiforme	74	Female	m6AclusterA
TCGA-19-4065-01	WT	WT	Mut	Glioblastoma Multiforme	36	Male	m6AclusterB
TCGA-19-4065-02	WT	WT	Mut	Glioblastoma Multiforme	36	Male	m6AclusterA
TCGA-19-4068-01	WT	WT	WT	Glioblastoma Multiforme	68	Female	m6AclusterA
TCGA-19-5947-01	WT	WT	WT	Glioblastoma Multiforme	47	Female	m6AclusterB
TCGA-19-5951-01	WT	WT	WT	Glioblastoma Multiforme	76	Female	m6AclusterA
TCGA-19-5952-01	WT	WT	WT	Glioblastoma Multiforme	62	Male	m6AclusterA
TCGA-19-5954-01	WT	WT	WT	Glioblastoma Multiforme	72	Female	m6AclusterA
TCGA-19-5955-01	WT	WT	WT	Glioblastoma Multiforme	83	Male	m6AclusterA
TCGA-19-5956-01	WT	Mut	Mut	Glioblastoma Multiforme	53	Female	m6AclusterA
TCGA-19-5958-01	WT	WT	WT	Glioblastoma Multiforme	56	Male	m6AclusterA
TCGA-19-5959-01	WT	WT	WT	Glioblastoma Multiforme	77	Female	m6AclusterA
TCGA-19-5960-01	WT	WT	WT	Glioblastoma Multiforme	56	Male	m6AclusterA
TCGA-26-1439-01	WT	Mut	WT	Glioblastoma Multiforme	63	Male	m6AclusterA
TCGA-26-1442-01	Mut	WT	Mut	Glioblastoma Multiforme	43	Male	m6AclusterA
TCGA-26-1799-01	WT	WT	WT	Glioblastoma Multiforme	68	Male	m6AclusterA
TCGA-26-5132-01	WT	WT	WT	Glioblastoma Multiforme	74	Male	m6AclusterA
TCGA-26-5133-01	WT	WT	Mut	Glioblastoma Multiforme	59	Male	m6AclusterA
TCGA-26-5134-01	WT	WT	WT	Glioblastoma Multiforme	74	Male	m6AclusterA
TCGA-26-5135-01	WT	WT	WT	Glioblastoma Multiforme	72	Female	m6AclusterA
TCGA-26-5139-01	WT	Mut	WT	Glioblastoma Multiforme	65	Female	m6AclusterA
TCGA-26-6173-01	WT	WT	WT	Glioblastoma Multiforme	57	Male	m6AclusterA
TCGA-26-6174-01	WT	WT	WT	Glioblastoma Multiforme	65	Female	m6AclusterA
TCGA-27-1830-01	WT	WT	Mut	Glioblastoma Multiforme	57	Male	m6AclusterA
TCGA-27-1831-01	WT	Mut	WT	Glioblastoma Multiforme	66	Male	m6AclusterB
TCGA-27-1832-01	WT	WT	WT	Glioblastoma Multiforme	59	Female	m6AclusterB
TCGA-27-1833-01	WT	WT	WT	Glioblastoma Multiforme	67	Female	m6AclusterB
TCGA-27-1834-01	WT	WT	WT	Glioblastoma Multiforme	56	Male	m6AclusterA
TCGA-27-1835-01	WT	WT	Mut	Glioblastoma Multiforme	53	Female	m6AclusterA
TCGA-27-1836-01	WT	Mut	Mut	Glioblastoma Multiforme	33	Female	m6AclusterB
TCGA-27-1837-01	WT	WT	WT	Glioblastoma Multiforme	36	Male	m6AclusterB
TCGA-27-1838-01	WT	Mut	Mut	Glioblastoma Multiforme	59	Female	m6AclusterB
TCGA-27-2518-01	WT	WT	WT	Glioblastoma Multiforme	52	Male	m6AclusterB
TCGA-27-2519-01	WT	WT	Mut	Glioblastoma Multiforme	48	Male	m6AclusterB
TCGA-27-2521-01	Mut	WT	Mut	Glioblastoma Multiforme	34	Male	m6AclusterB
TCGA-27-2523-01	WT	WT	Mut	Glioblastoma Multiforme	63	Male	m6AclusterA
TCGA-27-2524-01	WT	WT	Mut	Glioblastoma Multiforme	56	Male	m6AclusterB
TCGA-27-2526-01	WT	WT	Mut	Glioblastoma Multiforme	79	Female	m6AclusterB
TCGA-27-2527-01	WT	WT	WT	Glioblastoma Multiforme	81	Male	m6AclusterB
TCGA-27-2528-01	WT	Mut	WT	Glioblastoma Multiforme	62	Male	m6AclusterB
TCGA-28-1746-01	WT	WT	Mut	Glioblastoma Multiforme	77	Female	m6AclusterA
TCGA-28-1749-01	WT	Mut	WT	Glioblastoma Multiforme	73	Male	m6AclusterA
TCGA-28-1750-01	WT	WT	WT	Glioblastoma Multiforme	40	Female	m6AclusterA
TCGA-28-1751-01	WT	WT	WT	Glioblastoma Multiforme	61	Female	m6AclusterA
TCGA-28-1752-01	WT	Mut	Mut	Glioblastoma Multiforme	42	Female	m6AclusterB
TCGA-28-1753-01	WT	Mut	Mut	Glioblastoma Multiforme	53	Male	m6AclusterA
TCGA-28-1755-01	WT	WT	WT	Glioblastoma Multiforme	52	Female	m6AclusterA
TCGA-28-1757-01	WT	Mut	WT	Glioblastoma Multiforme	71	Male	m6AclusterA
TCGA-28-1760-01	WT	WT	WT	Glioblastoma Multiforme	48	Male	m6AclusterB
TCGA-28-2506-01	WT	WT	WT	Glioblastoma Multiforme	63	Female	m6AclusterB
TCGA-28-2509-01	WT	Mut	Mut	Glioblastoma Multiforme	77	Female	m6AclusterB
TCGA-28-2513-01	WT	WT	WT	Glioblastoma Multiforme	69	Female	m6AclusterB
TCGA-28-2514-01	WT	WT	WT	Glioblastoma Multiforme	45	Male	m6AclusterA
TCGA-28-5204-01	WT	WT	WT	Glioblastoma Multiforme	72	Male	m6AclusterA
TCGA-28-5207-01	WT	Mut	Mut	Glioblastoma Multiforme	71	Male	m6AclusterA
TCGA-28-5208-01	WT	WT	WT	Glioblastoma Multiforme	52	Male	m6AclusterA
TCGA-28-5209-01	WT	Mut	WT	Glioblastoma Multiforme	66	Female	m6AclusterA
TCGA-28-5213-01	WT	Mut	WT	Glioblastoma Multiforme	72	Male	m6AclusterB
TCGA-28-5214-01	WT	WT	WT	Glioblastoma Multiforme	53	Male	m6AclusterB
TCGA-28-5215-01	WT	WT	Mut	Glioblastoma Multiforme	62	Female	m6AclusterA
TCGA-28-5216-01	WT	WT	Mut	Glioblastoma Multiforme	52	Male	m6AclusterB
TCGA-28-5218-01	WT	WT	WT	Glioblastoma Multiforme	63	Male	m6AclusterA
TCGA-28-5219-01	WT	WT	Mut	Glioblastoma Multiforme	47	Female	m6AclusterA
TCGA-28-5220-01	WT	WT	WT	Glioblastoma Multiforme	67	Male	m6AclusterB
TCGA-28-6450-01	WT	WT	WT	Glioblastoma Multiforme	60	Male	m6AclusterA
TCGA-32-1970-01	WT	Mut	Mut	Glioblastoma Multiforme	59	Male	m6AclusterA
TCGA-32-1976-01	WT	WT	WT	Glioblastoma Multiforme	65	Male	m6AclusterA
TCGA-32-1977-01	WT	WT	WT	Glioblastoma Multiforme	63	Female	m6AclusterB
TCGA-32-1979-01	WT	Mut	WT	Glioblastoma Multiforme	69	Female	m6AclusterB
TCGA-32-1980-01	WT	WT	WT	Glioblastoma Multiforme	72	Male	m6AclusterB
TCGA-32-1982-01	WT	Mut	Mut	Glioblastoma Multiforme	76	Female	m6AclusterB
TCGA-32-1986-01	WT	WT	WT	Glioblastoma Multiforme	68	Male	m6AclusterB
TCGA-32-1991-01	WT	Mut	WT	Glioblastoma Multiforme	60	Male	m6AclusterA
TCGA-32-2491-01	WT	WT	Mut	Glioblastoma Multiforme	63	Male	m6AclusterB
TCGA-32-2494-01	WT	WT	WT	Glioblastoma Multiforme	58	Female	m6AclusterB
TCGA-32-2495-01	WT	WT	WT	Glioblastoma Multiforme	59	Female	m6AclusterB
TCGA-32-2615-01	WT	WT	WT	Glioblastoma Multiforme	62	Male	m6AclusterB
TCGA-32-2616-01	WT	WT	Mut	Glioblastoma Multiforme	48	Female	m6AclusterA
TCGA-32-2632-01	WT	Mut	WT	Glioblastoma Multiforme	80	Male	m6AclusterB
TCGA-32-2634-01	WT	WT	Mut	Glioblastoma Multiforme	82	Male	m6AclusterA
TCGA-32-2638-01	WT	WT	WT	Glioblastoma Multiforme	67	Male	m6AclusterA
TCGA-32-4208-01	Mut	WT	Mut	Glioblastoma Multiforme	25	Male	m6AclusterB
TCGA-32-4210-01	WT	WT	Mut	Glioblastoma Multiforme	73	Male	m6AclusterA
TCGA-32-4211-01	WT	WT	WT	Glioblastoma Multiforme	56	Male	m6AclusterB
TCGA-32-4213-01	WT	WT	WT	Glioblastoma Multiforme	47	Female	m6AclusterB
TCGA-32-4719-01	WT	WT	WT	Glioblastoma Multiforme	73	Male	m6AclusterA
TCGA-32-5222-01	WT	WT	WT	Glioblastoma Multiforme	66	Male	m6AclusterB
TCGA-41-2571-01	WT	WT	WT	Glioblastoma Multiforme	89	Male	m6AclusterB
TCGA-41-2572-01	WT	WT	WT	Glioblastoma Multiforme	67	Male	m6AclusterB
TCGA-41-2573-01	WT	WT	WT	Glioblastoma Multiforme	59	Male	m6AclusterA
TCGA-41-2575-01	WT	WT	Mut	Glioblastoma Multiforme	75	Male	m6AclusterB
TCGA-41-3392-01	WT	WT	WT	Glioblastoma Multiforme	88	Male	m6AclusterB
TCGA-41-3393-01	WT	WT	WT	Glioblastoma Multiforme	81	Female	m6AclusterB
TCGA-41-3915-01	WT	WT	WT	Glioblastoma Multiforme	48	Male	m6AclusterB
TCGA-41-4097-01	WT	WT	WT	Glioblastoma Multiforme	63	Female	m6AclusterA
TCGA-41-5651-01	WT	WT	Mut	Glioblastoma Multiforme	59	Female	m6AclusterA
TCGA-41-6646-01	WT	WT	WT	Glioblastoma Multiforme	73	Female	m6AclusterA
TCGA-74-6573-01	WT	WT	Mut	Glioblastoma Multiforme	67	Male	m6AclusterA
TCGA-74-6575-01	WT	WT	WT	Glioblastoma Multiforme	73	Female	m6AclusterA
TCGA-74-6577-01	WT	WT	WT	Glioblastoma Multiforme	51	Male	m6AclusterA
TCGA-74-6578-01	WT	WT	WT	Glioblastoma Multiforme	58	Male	m6AclusterA
TCGA-74-6581-01	WT	WT	WT	Glioblastoma Multiforme	77	Male	m6AclusterA
TCGA-74-6584-01	WT	WT	WT	Glioblastoma Multiforme	55	Female	m6AclusterA
TCGA-76-4925-01	WT	WT	Mut	Glioblastoma Multiforme	76	Male	m6AclusterA
TCGA-76-4927-01	WT	Mut	WT	Glioblastoma Multiforme	58	Male	m6AclusterA
TCGA-76-4929-01	WT	WT	Mut	Glioblastoma Multiforme	76	Female	m6AclusterA
TCGA-76-4931-01	WT	Mut	WT	Glioblastoma Multiforme	70	Female	m6AclusterA
TCGA-76-4932-01	WT	WT	WT	Glioblastoma Multiforme	50	Female	m6AclusterA
TCGA-76-4934-01	WT	WT	Mut	Glioblastoma Multiforme	66	Female	m6AclusterB
TCGA-76-4935-01	WT	WT	WT	Glioblastoma Multiforme	52	Female	m6AclusterA
TCGA-76-6191-01	WT	Mut	WT	Glioblastoma Multiforme	57	Male	m6AclusterA
TCGA-76-6193-01	WT	WT	Mut	Glioblastoma Multiforme	78	Male	m6AclusterB
TCGA-76-6280-01	WT	WT	WT	Glioblastoma Multiforme	57	Male	m6AclusterA
TCGA-76-6282-01	WT	Mut	WT	Glioblastoma Multiforme	63	Male	m6AclusterA
TCGA-76-6283-01	WT	WT	Mut	Glioblastoma Multiforme	71	Female	m6AclusterA
TCGA-76-6285-01	WT	WT	WT	Glioblastoma Multiforme	64	Female	m6AclusterA
TCGA-76-6286-01	WT	WT	Mut	Glioblastoma Multiforme	60	Male	m6AclusterA
TCGA-76-6656-01	WT	Mut	WT	Glioblastoma Multiforme	66	Male	m6AclusterA
TCGA-76-6657-01	WT	WT	WT	Glioblastoma Multiforme	74	Male	m6AclusterA
TCGA-76-6660-01	WT	WT	WT	Glioblastoma Multiforme	73	Male	m6AclusterA
TCGA-76-6662-01	WT	WT	Mut	Glioblastoma Multiforme	58	Male	m6AclusterA
TCGA-76-6664-01	WT	WT	Mut	Glioblastoma Multiforme	49	Female	m6AclusterA
TCGA-81-5910-01	WT	Mut	WT	Glioblastoma Multiforme	64	Male	m6AclusterA
TCGA-81-5911-01	WT	Mut	WT	Glioblastoma Multiforme	33	Male	m6AclusterA
TCGA-87-5896-01	WT	WT	WT	Glioblastoma Multiforme	50	Female	m6AclusterA
