# Supplementary material for: Integrating machine learning and bioinformatics analysis to m6A regulator-mediated methylation modification models for predicting glioblastoma patients’ prognosis and immunotherapy response
Source: Aging (Albany NY). 2023 May 23;15(10):4051–70. doi: 10.18632/aging.204495 (PMC10257999; doi:10.18632/aging.204495)
Supplement: Supplementary Table 10 [file aging-15-204495-s012.xls]

## Sheet: SupplementaryTable10_GeneSignat
Supplementary Table 10. GeneSignature_gsva.
TCGA-28-1753-01	TCGA-06-0219-01	TCGA-28-5213-01	TCGA-06-5411-01	TCGA-19-2620-01	TCGA-06-5858-01	TCGA-06-2564-01	TCGA-06-0221-02	TCGA-06-2558-01	TCGA-06-0745-01	TCGA-15-0742-01	TCGA-26-5132-01	TCGA-19-0957-02	TCGA-06-0187-01	TCGA-06-2561-01	TCGA-12-3652-01	TCGA-14-0817-01	TCGA-06-0158-01	TCGA-76-4931-01	TCGA-19-4065-01	TCGA-19-4065-02	TCGA-06-0686-01	TCGA-12-0616-01	TCGA-27-2521-01	TCGA-28-5215-01	TCGA-12-3653-01	TCGA-06-0749-01	TCGA-06-2562-01	TCGA-41-2572-01	TCGA-19-2624-01	TCGA-32-1980-01	TCGA-06-0211-02	TCGA-14-2554-01	TCGA-06-5413-01	TCGA-28-5208-01	TCGA-28-5218-01	TCGA-06-5410-01	TCGA-28-5207-01	TCGA-06-0747-01	TCGA-19-2625-01	TCGA-27-1835-01	TCGA-14-1034-01	TCGA-76-4929-01	TCGA-26-5133-01	TCGA-12-0618-01	TCGA-12-3650-01	TCGA-28-5220-01	TCGA-28-5209-01	TCGA-06-0743-01	TCGA-14-0787-01
CD8 T effector	0.764013	-0.272807	0.595466	-0.405481	-0.853195	-0.651059	-0.695613	-0.654895	-0.560944	0.287544	-0.700771	0.271815	-0.434218	-0.329789	-0.662516	0.290615	0.653809	-0.69021	-0.726537	0.531493	0.425847	-0.436703	0.718769	-0.50883	0.530705	-0.290036	-0.365522	-0.553423	0.496667	-0.600586	0.619791	0.738404	-0.236853	0.626913	-0.30964	0.818665	0.580635	-0.347411	-0.691161	-0.62277	0.355254	-0.330567	-0.717572	-0.762306	-0.774576	-0.346853	-0.258183	-0.486306	0.654323
DNA damage repair	-0.142302	0.19793	-0.200032	-0.288252	-0.465782	0.25165	0.220128	0.135998	0.178866	0.171782	0.392549	0.442124	-0.368544	-0.277793	-0.278385	0.195983	0.173986	-0.302174	0.417831	0.166509	-0.196531	0.205785	0.292481	0.268776	-0.277654	0.389621	-0.424164	-0.298133	-0.228036	0.404732	-0.538602	-0.195181	-0.277877	0.371439	0.390852	-0.183498	-0.453764	0.132878	0.168226	-0.18363	0.200076	0.23142	-0.245073	0.278566	0.179073	0.384605	0.231974	0.388448	-0.182904
Pan-F-TBRS	0.646642	-0.410729	0.274939	-0.211717	0.504257	0.386446	-0.239173	-0.497511	-0.265681	0.22176	-0.401355	0.241977	-0.195556	0.43783	-0.508667	0.194432	-0.485792	0.260953	-0.430038	0.258086	0.802178	0.204191	-0.399353	-0.526698	0.318619	-0.420377	-0.550573	0.679736	0.418874	-0.408044	0.188434	0.629977	-0.522124	0.176549	0.165818	0.651959	0.517246	-0.579837	-0.457836	0.441281	-0.27324	-0.221112	-0.543189	-0.750954	-0.513701	-0.414743	-0.723557	0.503575	-0.42027
Antigen processing machinery	0.587435	0.513674	0.596054	-0.787533	-0.594512	0.591879	-0.615385	-0.906	-0.876264	0.548793	-0.584016	0.511535	-0.562585	0.820672	-0.720657	0.84166	0.781589	-0.599341	-0.789965	0.32107	0.437857	-0.786059	0.66341	-0.853419	-0.706089	0.994008	-0.561626	-0.753502	0.944723	-0.924051	-0.40843	0.389472	-0.62519	-0.516289	-0.574252	-0.623474	0.63542	-0.752153	0.536124	-0.402966	-0.658529	0.499966	-0.716201	-0.60022	-0.889222	0.507738	-0.447596	0.574076	-0.673807
Immune checkpoint	0.512769	0.177378	0.497467	-0.412945	-0.491396	-0.451366	0.377428	-0.566159	-0.672539	-0.669434	-0.528784	0.301277	-0.26126	-0.271566	0.577405	-0.421741	0.520084	0.420833	-0.707478	0.682858	0.478633	-0.415076	0.52744	-0.794807	0.18839	0.426228	0.461149	0.323396	0.274671	-0.64308	0.553979	0.36422	-0.336608	-0.326142	-0.618237	0.431147	0.578852	-0.582367	-0.660166	-0.377073	-0.477135	0.473278	-0.605531	-0.617813	-0.661433	-0.318521	-0.41089	-0.627721	-0.330337
EMT1	0.589484	-0.376503	0.206098	-0.451598	0.542499	-0.256755	0.232774	-0.459506	0.363626	0.515194	-0.318815	-0.266041	0.33999	-0.230591	-0.315253	-0.254051	-0.397784	0.22685	-0.239062	0.375099	0.496839	0.463711	0.26796	-0.492135	-0.38171	-0.284099	-0.360852	-0.296228	0.246814	0.384991	-0.376688	-0.364303	-0.491258	-0.663623	-0.309783	0.32057	0.289832	0.31119	0.329498	0.515722	-0.358963	0.332301	0.228737	-0.511956	0.259884	0.281301	-0.49931	0.268364	-0.219028
FGFR3-related genees	0.629971	0.608267	-0.547817	0.394541	0.777145	-0.682596	0.600215	0.454729	0.38575	0.502737	0.342686	0.285039	0.37985	0.434492	0.375902	0.439002	-0.536883	0.863594	0.479893	-0.737812	0.543776	0.433222	-0.311541	-0.572491	0.508155	-0.654065	0.598071	-0.411443	-0.327904	-0.358197	0.587072	0.406003	0.254457	-0.657006	-0.846767	-0.766817	-0.487381	-0.491275	0.906125	0.674231	0.461714	-0.328458	0.456438	-0.690856	-0.517691	0.39669	-0.745667	-0.340494	-0.414799
KEGG discovered histones	-0.631823	0.841857	0.667615	0.832048	-0.629427	0.914414	-0.576114	-0.699813	0.812654	0.503856	-0.540547	0.615051	0.574317	0.502808	0.725122	0.620142	0.533583	-0.96024	-0.805017	-0.528192	0.7997	0.615051	0.795133	0.500786	0.825384	0.684238	-0.965631	0.696069	0.532759	-0.650543	-0.899438	-0.836466	-0.757394	0.811531	-0.611382	-0.642756	0.786372	-0.987046	-0.933433	-0.868589	-0.820592	0.988693	0.564732	-0.60921	-0.831823	0.55103	0.782928	-0.63699	-0.725496
Angiogenesis	0.830213	-0.602307	-0.60373	0.399023	0.646587	0.434691	0.63505	-0.324283	0.888481	0.70545	0.358686	0.496528	-0.64642	0.355929	-0.430344	0.549831	0.547942	0.552127	-0.818454	-0.467102	0.595618	0.445315	-0.75151	0.364065	0.325195	0.362832	0.331076	0.267825	0.787822	-0.55972	0.427208	0.764773	-0.689477	0.713002	0.376121	0.748352	0.466396	0.870397	-0.7909	-0.874775	0.782355	-0.441352	-0.809648	-0.371255	-0.768724	0.443305	-0.677169	0.458279	0.61859
Fanconi anemia	0.170874	0.209619	-0.327424	-0.288785	-0.621267	0.433207	0.277008	0.22441	0.175977	0.187622	0.462069	0.556421	-0.354717	-0.243616	-0.378896	-0.138454	0.193147	-0.273272	0.558757	0.204084	-0.255432	0.159309	0.384018	0.218947	-0.108657	0.401401	-0.63732	-0.377704	-0.230496	0.552014	-0.656615	-0.253575	-0.322742	0.46553	0.423286	-0.251969	-0.595956	0.276031	-0.150556	0.203196	0.258677	0.303581	-0.260494	0.228279	0.288489	0.521187	0.288985	0.466444	-0.239963
Cell cycle	0.319325	0.15933	-0.387929	-0.296332	-0.465657	0.313408	-0.173649	-0.11476	0.256444	0.173317	0.241973	0.365452	-0.173244	0.15702	-0.436201	0.184378	0.251011	-0.288397	0.283975	-0.188336	0.116507	0.353082	0.43415	0.279526	0.253793	0.341006	-0.527763	-0.396577	-0.24761	0.439033	-0.538138	-0.216694	-0.288633	0.273424	0.300431	0.173902	-0.448025	-0.269382	-0.128078	-0.161762	-0.186164	0.263877	-0.333848	0.214607	0.280413	0.469123	-0.141785	0.440359	-0.362991
DNA replication	0.21979	0.385722	0.222054	-0.403049	-0.696026	0.469643	-0.40482	-0.311766	0.105213	0.45245	0.498389	0.577469	-0.564162	-0.288105	-0.582072	0.196706	0.45181	-0.467828	0.536276	-0.295309	-0.366136	0.294905	0.531518	0.209421	-0.202174	0.519813	-0.597271	-0.611235	-0.185784	0.340671	-0.754231	-0.316121	-0.26453	0.516783	0.516871	0.144518	-0.590868	-0.192245	-0.258791	0.364855	-0.170444	0.446978	-0.2992	0.171896	0.154505	0.699283	0.386318	0.471895	-0.379295
Nucleotide excision repair	-0.332619	0.268256	0.294632	-0.278802	-0.477506	0.227847	-0.237869	-0.322146	-0.167174	0.248092	0.313057	0.422463	-0.454298	-0.342228	-0.381649	0.19796	0.332152	-0.378557	0.344053	0.204392	-0.352082	-0.195214	0.381949	0.242072	-0.367214	0.311898	-0.397249	-0.278742	-0.311167	0.303172	-0.548324	-0.236532	0.260021	0.4798	0.482014	-0.33015	-0.463847	0.187031	-0.184605	-0.249918	-0.128705	0.417839	-0.326436	0.206249	0.129616	0.451216	0.361458	0.353266	-0.164494
Homologous recombination	0.175913	0.20008	0.249449	-0.526113	-0.687205	0.421302	0.228024	-0.260495	-0.16875	0.306755	0.479108	0.511251	-0.514342	0.235659	-0.332196	-0.240951	0.218098	-0.357476	0.527558	0.200801	-0.33243	0.244309	0.315531	0.159988	-0.448967	0.498252	-0.518679	-0.358741	0.305607	0.496299	-0.66341	-0.188318	-0.270508	0.400936	0.437929	-0.166528	-0.576909	-0.201308	0.205716	0.326209	0.336492	0.336971	-0.230582	0.284327	0.157512	0.4551	0.399261	0.481489	0.251702
Mismatch repair	-0.238786	0.294752	0.306124	-0.367957	-0.710519	0.488719	0.332989	-0.390476	0.148124	0.296373	0.52512	0.625337	-0.51138	-0.209109	-0.456883	0.203607	0.288181	-0.450918	0.492929	-0.253317	-0.553074	0.248475	0.439953	-0.139734	-0.363274	0.491234	-0.631049	-0.470944	-0.198131	0.373122	-0.779156	-0.266427	-0.177454	0.603417	0.526443	-0.172333	-0.528073	0.287952	-0.204992	0.27846	-0.166278	0.534165	-0.19062	-0.216041	0.141048	0.606916	0.468643	0.597869	-0.283886
EMT2	0.51394	-0.358733	0.614044	-0.594115	0.353598	-0.306442	-0.374675	-0.647515	-0.673041	-0.587963	-0.792941	-0.39157	-0.405756	0.575068	-0.541611	-0.504598	0.317453	-0.297563	-0.741798	0.309935	0.817837	-0.433596	-0.365243	-0.325483	0.686462	-0.691003	-0.447134	0.482347	-0.547568	-0.661446	-0.288152	0.591295	0.263431	0.50707	-0.474473	0.678285	0.590026	-0.587337	-0.446649	-0.372738	-0.6308	0.596128	-0.440227	-0.555859	-0.626803	-0.693046	-0.512994	0.38748	-0.369529
EMT3	0.549726	-0.379442	-0.279457	-0.519717	0.469158	-0.555171	0.357077	0.481325	-0.49417	0.461592	-0.484641	-0.394537	0.395685	0.63022	-0.465165	-0.417587	-0.414614	0.332389	-0.384799	-0.292959	-0.497804	-0.274462	-0.232813	-0.551648	0.351191	-0.333857	-0.472928	-0.393783	0.282103	0.561082	-0.545	0.431904	-0.608176	0.472532	0.479748	0.575972	-0.30012	0.49193	-0.426817	-0.293468	0.415425	0.30351	-0.291709	0.450618	0.364126	0.456627	-0.398741	0.654286	-0.229953
WNT target	0.384764	0.365938	-0.590473	-0.646417	-0.434804	0.283403	-0.436148	-0.478939	0.613213	0.458964	0.646898	0.408937	-0.380302	0.760361	-0.78682	0.586354	-0.379124	0.329464	0.527597	0.216597	-0.516247	0.592555	0.324981	0.627552	0.587577	-0.29977	-0.800409	0.7711	-0.280707	-0.299431	-0.42318	0.3037	-0.323692	0.323981	0.364094	-0.364987	-0.529353	-0.608602	-0.36751	-0.504648	-0.632925	-0.552805	0.329023	0.33152	0.660077	0.415762	-0.795245	0.723232	-0.294851
Cell cycle regulators	0.571661	-0.303761	-0.443186	-0.404205	-0.427319	-0.317702	0.594672	-0.387534	0.334032	-0.470898	-0.403617	0.431927	0.430604	-0.300564	-0.305736	-0.502279	-0.530294	-0.35017	0.137901	0.324779	0.235576	0.449289	0.522145	0.261733	-0.453422	0.463137	-0.642506	0.493021	0.275307	0.526275	-0.296744	0.421478	-0.433812	-0.31438	0.305084	0.208452	-0.190974	-0.303612	-0.211252	-0.271514	-0.340956	-0.362587	-0.501056	0.430633	-0.287471	0.277328	-0.528299	0.327361	-0.578166
[truncated: 100 more columns]
