# Supplementary material for: Integrating machine learning and bioinformatics analysis to m6A regulator-mediated methylation modification models for predicting glioblastoma patients’ prognosis and immunotherapy response
Source: Aging (Albany NY). 2023 May 23;15(10):4051–70. doi: 10.18632/aging.204495 (PMC10257999; doi:10.18632/aging.204495)
Supplement: Supplementary Table 11a [file aging-15-204495-s013.xls]

## Sheet: SupplementaryTable11_figure4_ex
Supplementary Table 11a. Figure4_exp.
TCGA-06-5858-01	TCGA-06-0221-02	TCGA-19-0957-02	TCGA-19-4065-01	TCGA-19-4065-02	TCGA-14-1402-02	TCGA-06-0211-02	TCGA-06-0210-02	TCGA-06-0190-02	TCGA-19-5960-01	TCGA-14-0736-02	TCGA-19-1389-02	TCGA-06-0125-02	TCGA-06-0152-02	TCGA-06-0171-02	CGGA_1001	CGGA_1007	CGGA_1011	CGGA_1015	CGGA_1019	CGGA_1023	CGGA_1024	CGGA_1026	CGGA_1035	CGGA_1039	CGGA_1045	CGGA_1049	CGGA_1072	CGGA_1077	CGGA_1078	CGGA_1083	CGGA_1091	CGGA_1109	CGGA_1124	CGGA_1139	CGGA_1171	CGGA_1177	CGGA_1180	CGGA_1188	CGGA_1214	CGGA_1216	CGGA_1218	CGGA_1224	CGGA_1234	CGGA_1237	CGGA_1240	CGGA_1251	CGGA_1258	CGGA_1270	CGGA_1271
METTL3	0.498439	0.440038	0.0233375	0.91228	0.430904	1.20939	0.708111	0.351276	0.428002	0.504707	0.58213	-0.345139	-0.344545	0.709949	0.0378339	0.0445373	-0.0353694	0.0950157	-0.0671034	0.425468	1.30658	0.377898	1.23152	-0.526893	0.339879	0.602571	-0.355356	0.297553	0.725022	-0.412221	0.0306162	0.534914	0.951088	0.138878	0.696458	0.102914	0.118419	0.0320605	0.761951	0.765903	-0.27741	0.594706	0.198277	0.6435	0.285453	0.207231	0.624802	0.16282	-0.136057
RBM15	-0.280028	-0.291066	-0.131546	0.114125	-0.276199	-0.0922168	-0.57134	-0.638872	-0.17285	0.422406	0.0293408	0.150459	-0.245672	-0.659589	0.12317	-0.0462873	-0.547217	-0.744522	0.152866	-0.246271	0.0907175	-0.60517	-0.439907	0.124821	-0.233115	-0.0282672	0.469117	0.397791	0.116974	-0.583335	0.111032	0.141189	-0.746264	-0.16199	-0.322033	-0.734835	-0.209404	0.461782	-0.213305	0.252634	-0.565203	-1.1432	-0.395767	-0.177928	-0.37307	-0.134678	-0.638578	-0.00328873	0.0945597
RBM15B	0.743757	1.21151	0.697604	0.365622	0.964252	-0.354625	0.685783	0.946718	0.690707	1.17759	0.264832	0.69011	0.634818	0.678295	0.509239	0.688998	0.755027	0.125485	0.659398	0.453628	0.507424	0.955685	0.434686	0.646738	1.02835	0.38949	0.905373	0.513323	0.863094	-0.0869418	0.724238	0.897506	0.0648642	0.610771	0.662799	0.141588	0.609397	1.0317	0.674463	1.28386	0.626401	0.0373559	0.65734	0.19594	0.939326	0.660202	0.580657	1.3044	0.692545
WTAP	1.12475	0.687507	1.16721	1.67489	1.13121	2.40266	2.31458	1.67207	2.04736	0.378218	2.03257	2.1997	1.6661	1.48752	1.5046	1.71723	1.61782	1.10139	1.4032	1.09613	0.544377	1.73878	1.53265	2.38014	1.70841	2.48582	2.29293	1.22383	1.84308	0.905854	1.98497	1.91865	1.43639	3.09881	0.880002	2.66443	2.60774	2.0814	1.20576	1.42744	1.49358	1.81865	1.38258	1.49176	1.58934	1.53591	1.45446	1.69	1.63407
KIAA1429	0.373503	0.215053	0.393888	0.35178	0.872684	0.565134	0.0512528	0.445433	0.689851	1.04935	0.235103	0.427356	0.258549	0.105724	0.44679	0.329957	0.435375	0.459362	0.844503	0.491269	0.956136	0.348538	0.390075	0.31929	0.502395	0.685235	-0.0551702	-0.436825	1.03013	0.20799	-0.0615038	0.0586448	-0.231818	0.183239	1.18256	0.0840393	0.752262	1.2311	1.5947	0.878683	0.561434	0.131557	1.18625	0.611918	1.16432	0.213018	0.766633	1.23312	1.08763
CBLL1	0.978319	0.860039	0.268371	0.448273	-0.0591824	0.280801	0.477521	0.572971	0.0780421	1.21231	0.226213	0.519733	0.818687	0.476758	0.262219	0.18251	1.03295	0.148022	0.93924	0.323062	0.301298	0.418977	1.04462	0.78181	0.816772	0.17806	0.706256	1.13348	0.0204438	0.816683	0.910279	0.818802	0.66544	0.485102	-0.0151645	0.207031	-0.125019	-0.112162	-0.658381	0.43557	-0.602925	0.0568556	-0.373724	0.184915	0.480468	-0.0181326	0.080033	0.384105	-0.22517
ZC3H13	1.09263	0.91301	1.30397	0.183896	0.881781	0.362169	0.294486	1.02339	0.250077	1.55215	0.16292	0.651528	1.09499	0.832235	1.12747	0.653236	0.34064	0.524331	0.612381	0.598531	0.486909	0.59929	0.767212	0.497318	0.822136	0.0737079	0.490991	0.991389	0.892491	0.909976	0.746306	0.663263	0.542291	0.567608	1.38609	0.455121	0.407593	0.473177	0.917973	0.878277	0.126067	0.515917	0.743468	1.07338	1.02888	0.245332	0.481456	1.27117	1.13684
ALKBH5	0.92826	0.434502	1.19108	0.659599	1.09069	0.262805	0.528063	1.02924	1.00981	0.758081	1.07055	1.04479	1.27371	0.625037	0.832108	1.16888	0.754731	0.733557	1.33122	1.24228	1.36497	0.561152	0.445475	1.41329	0.687146	0.710323	1.26292	0.159374	0.986442	0.515174	1.37043	1.19288	0.27461	0.725749	1.30821	0.611461	0.697918	0.656095	0.922569	1.20326	1.24345	0.591317	0.943762	0.670702	0.496139	0.747544	0.518538	0.961744	1.25232
FTO	1.10854	1.35839	1.64724	1.07302	1.19203	1.25597	1.31039	1.54837	0.846039	2.30407	1.87463	0.543166	1.8285	1.23542	1.25177	1.29103	1.86217	1.46899	1.45902	0.6085	0.192843	1.56535	1.21109	1.29464	1.33981	0.569417	1.71501	1.62068	-0.0407424	2.10799	1.84522	1.676	1.64662	0.974362	1.2846	0.730565	0.472483	1.22428	0.0989253	0.7667	1.55758	1.60602	0.630308	1.42091	1.26064	0.911661	0.913664	1.2661	0.235294
YTHDC1	1.07882	1.40451	1.39183	0.561537	0.847849	0.867771	0.804512	0.931344	0.827043	1.9435	0.618943	0.784759	1.06745	0.90674	0.98337	0.793052	0.777103	0.85701	1.07634	0.363345	0.932018	0.919515	1.3557	0.83172	1.35877	0.599793	0.705985	0.677366	0.39475	0.775945	0.634137	0.840614	0.674203	0.654259	1.19291	0.856078	0.422469	1.2251	1.30675	1.41243	0.97586	0.79967	1.02795	0.915052	0.823255	0.671036	1.32503	1.49988	0.587141
YTHDC2	0.0764182	0.491476	0.0582345	0.412482	0.42504	0.988813	0.11518	-0.26394	0.224631	0.683695	0.838569	0.814658	0.190525	0.31875	0.447471	-0.00888252	0.156618	-0.194787	0.77766	-0.268495	0.332238	0.10612	0.665779	0.250274	0.292006	0.415785	0.548241	0.790988	-0.2198	0.591472	0.45876	-0.478108	0.779655	0.320625	0.0964677	0.547626	0.0609692	0.694217	0.69275	0.719982	0.514492	-0.0134151	0.831347	0.278967	0.572088	0.219429	0.186048	0.913787	0.0572447
YTHDF1	0.913371	1.08211	1.25408	1.03683	0.822718	1.23539	1.6226	1.36466	0.725979	1.18348	0.988888	1.05607	1.8341	1.55433	1.65409	0.870499	1.18661	0.644552	1.34346	1.1315	1.12571	1.28801	0.920579	1.12025	1.26732	1.5618	1.74959	1.05098	1.12225	0.998698	1.86245	1.15427	0.915667	1.45645	1.37246	0.990726	0.858324	1.50752	1.41283	1.44894	1.88418	1.0144	1.4275	1.44614	0.963447	0.848143	0.339283	1.34825	0.89831
YTHDF2	1.24009	1.47594	1.28349	1.39096	1.07306	1.15951	1.36473	1.45777	1.38557	1.91658	1.29139	1.68229	0.964407	1.03412	1.06302	0.887451	1.39265	0.999818	1.48502	0.558843	0.60403	1.44742	1.17623	1.4561	1.50649	1.66672	2.06814	1.76752	1.57022	0.951613	1.22629	1.29783	1.01067	1.52366	1.12904	1.19978	1.26904	1.63494	1.03794	1.25104	0.993945	0.719012	1.29382	1.20637	1.54323	1.47815	1.5482	1.11549	1.42199
YTHDF3	0.418173	0.372528	0.124715	0.651908	0.32966	1.19554	0.637813	0.536882	0.59029	0.549843	0.673353	0.50236	0.692416	0.28379	0.934689	-0.0179799	0.26388	0.803357	1.25209	-0.648153	-0.964746	0.553728	0.435514	0.938941	0.671243	0.177505	0.975735	0.219675	0.321509	0.884685	0.697019	0.383883	0.568847	0.160124	-0.238394	0.512629	0.529022	0.103053	-0.809125	0.387302	-0.033464	0.22485	0.100354	0.677938	0.513721	0.694783	0.693271	0.182111	0.271143
HNRNPA2B1	1.59262	1.82632	1.53227	1.00232	1.28243	0.0825349	0.996731	1.30687	0.90234	2.20727	-0.127363	1.10874	0.747069	1.8245	0.70715	-0.521357	1.39412	1.14294	0.939957	-0.883078	0.154579	1.11563	2.38921	0.527717	1.69964	1.11057	1.29187	1.52198	0.359709	0.936866	-0.27764	0.119076	1.32963	0.826488	0.471115	1.51601	0.270581	1.16852	0.375914	1.45231	0.912791	1.19077	0.513305	1.00889	1.75194	0.804803	1.35503	1.43149	-0.110527
HNRNPC	1.69132	1.57	1.58737	2.03155	1.64575	2.22784	1.72887	1.45415	1.30991	1.76135	1.58022	1.19952	1.5567	1.66696	1.27934	1.18227	1.43357	1.4779	1.32495	1.1068	1.54385	1.55348	2.02373	1.47717	1.9806	1.39375	1.44075	1.90388	1.31205	1.27118	0.902671	1.64409	1.29271	1.36356	1.85865	1.40695	1.25457	2.18356	2.00958	1.98165	1.43523	1.38934	1.50521	1.6064	1.58844	1.74077	1.95612	1.96278	1.20551
FMR1	1.79332	1.01545	1.04685	0.702975	1.02242	1.04236	1.14181	0.653063	0.720266	1.42822	0.722817	0.637574	0.770866	0.49609	0.653884	0.380368	1.21949	0.889748	1.50777	-0.106758	-0.0878835	0.641437	1.28796	0.459314	1.03932	0.553246	0.301266	1.30468	0.736437	0.99674	0.713045	0.671366	0.496054	0.660135	1.06527	0.647459	0.236487	1.04979	0.581498	1.37716	0.857702	0.781502	0.59156	0.838842	0.804266	0.169455	0.995146	1.23385	0.59196
LRPPRC	0.681427	0.794888	0.304397	0.593468	0.427882	0.555492	0.341303	0.812305	-0.0721551	1.21867	0.742007	0.263013	0.778341	0.309564	0.423037	-0.0912608	0.553512	0.144565	-0.108399	0.221949	0.968506	0.718298	0.463678	0.467383	0.729435	0.990386	0.57328	0.943683	1.25815	0.50718	0.326921	0.421315	0.558496	0.569861	0.415032	0.564933	0.657712	0.515626	0.415975	0.085079	0.0257382	0.200722	-0.124264	0.446793	1.13292	0.0313743	0.770854	0.225281	0.799966
ELAVL1	0.934893	1.11042	0.858913	0.615881	0.813491	0.440989	1.10258	0.859726	1.08729	1.13588	0.646103	1.33261	0.921356	1.14655	0.385767	0.728521	1.16664	0.634691	1.07477	0.576502	0.171388	1.00312	0.879188	0.862647	1.02766	0.576612	1.00107	1.32819	0.996611	0.79593	1.39025	1.41827	0.918029	1.17125	0.837731	0.662309	0.861318	1.12783	0.285168	0.997804	0.848498	0.633992	0.809228	0.944405	0.761698	0.873182	0.538506	1.43616	0.355214
[truncated: 206 more columns]
