# Supplementary material for: Integrating machine learning and bioinformatics analysis to m6A regulator-mediated methylation modification models for predicting glioblastoma patients’ prognosis and immunotherapy response
Source: Aging (Albany NY). 2023 May 23;15(10):4051–70. doi: 10.18632/aging.204495 (PMC10257999; doi:10.18632/aging.204495)
Supplement: Supplementary Table 11b [file aging-15-204495-s014.xls]

## Sheet: SupplementaryTable11_figure4_fe
Supplementary Table 11b. Figure4_feature.
sample	cluster	project	age	os.time	os.status	type	sex
TCGA-06-5858-01	m6AclusterA	TCGA_seq	<60	184.2	LIVING	Primary	Female
TCGA-06-0221-02	m6AclusterA	TCGA_seq	<60	594.3	DECEASED	Recurrent	Male
TCGA-19-0957-02	m6AclusterA	TCGA_seq	<60	656.4	DECEASED	Recurrent	Female
TCGA-19-4065-01	m6AclusterB	TCGA_seq	<60	210.9	LIVING	Primary	Male
TCGA-19-4065-02	m6AclusterA	TCGA_seq	<60	210.9	LIVING	Recurrent	Male
TCGA-14-1402-02	m6AclusterB	TCGA_seq	<60	960.9	DECEASED	Recurrent	Female
TCGA-06-0211-02	m6AclusterB	TCGA_seq	<60	354.9	DECEASED	Recurrent	Male
TCGA-06-0210-02	m6AclusterA	TCGA_seq	>=60	221.7	DECEASED	Recurrent	Female
TCGA-06-0190-02	m6AclusterB	TCGA_seq	>=60	312.3	DECEASED	Recurrent	Male
TCGA-19-5960-01	m6AclusterA	TCGA_seq	<60	448.5	DECEASED	Primary	Male
TCGA-14-0736-02	m6AclusterB	TCGA_seq	<60	453.3	DECEASED	Recurrent	Male
TCGA-19-1389-02	m6AclusterB	TCGA_seq	<60	138.9	DECEASED	Recurrent	Male
TCGA-06-0125-02	m6AclusterB	TCGA_seq	>=60	1427.1	DECEASED	Recurrent	Female
TCGA-06-0152-02	m6AclusterA	TCGA_seq	>=60	369.6	DECEASED	Recurrent	Male
TCGA-06-0171-02	m6AclusterB	TCGA_seq	>=60	393.3	DECEASED	Recurrent	Male
CGGA_1001	m6AclusterB	CGGA.mRNAseq_325	<60	3817	LIVING	Primary	Male
CGGA_1007	m6AclusterA	CGGA.mRNAseq_325	<60	345	DECEASED	Primary	Female
CGGA_1011	m6AclusterB	CGGA.mRNAseq_325	<60	109	DECEASED	Primary	Female
CGGA_1015	m6AclusterA	CGGA.mRNAseq_325	>=60	164	DECEASED	Primary	Male
CGGA_1019	m6AclusterB	CGGA.mRNAseq_325	>=60	212	DECEASED	Recurrent	Male
CGGA_1023	m6AclusterB	CGGA.mRNAseq_325	<60	681	DECEASED	Primary	Female
CGGA_1024	m6AclusterB	CGGA.mRNAseq_325	>=60	3074	DECEASED	Primary	Male
CGGA_1026	m6AclusterA	CGGA.mRNAseq_325	<60	1570	DECEASED	Primary	Male
CGGA_1035	m6AclusterB	CGGA.mRNAseq_325	>=60	567	DECEASED	Primary	Female
CGGA_1039	m6AclusterA	CGGA.mRNAseq_325	<60	727	DECEASED	Primary	Male
CGGA_1045	m6AclusterB	CGGA.mRNAseq_325	>=60	348	DECEASED	Primary	Male
CGGA_1049	m6AclusterB	CGGA.mRNAseq_325	<60	809	DECEASED	Primary	Male
CGGA_1072	m6AclusterA	CGGA.mRNAseq_325	<60	1090	DECEASED	Primary	Male
CGGA_1077	m6AclusterB	CGGA.mRNAseq_325	<60	591	DECEASED	Primary	Male
CGGA_1078	m6AclusterB	CGGA.mRNAseq_325	>=60	315	DECEASED	Recurrent	Female
CGGA_1083	m6AclusterB	CGGA.mRNAseq_325	<60	450	DECEASED	Primary	Male
CGGA_1091	m6AclusterB	CGGA.mRNAseq_325	<60	1116	DECEASED	Primary	Female
CGGA_1109	m6AclusterB	CGGA.mRNAseq_325	<60	1348	DECEASED	Primary	Male
CGGA_1124	m6AclusterB	CGGA.mRNAseq_325	<60	484	DECEASED	Primary	Male
CGGA_1139	m6AclusterB	CGGA.mRNAseq_325	<60	1196	DECEASED	Primary	Female
CGGA_1171	m6AclusterB	CGGA.mRNAseq_325	<60	412	DECEASED	Primary	Male
CGGA_1177	m6AclusterB	CGGA.mRNAseq_325	<60	449	DECEASED	Recurrent	Male
CGGA_1180	m6AclusterA	CGGA.mRNAseq_325	<60	1226	LIVING	Primary	Female
CGGA_1188	m6AclusterB	CGGA.mRNAseq_325	<60	256	DECEASED	Secondary	Female
CGGA_1214	m6AclusterA	CGGA.mRNAseq_325	<60	604	DECEASED	Primary	Female
CGGA_1216	m6AclusterB	CGGA.mRNAseq_325	<60	312	DECEASED	Primary	Male
CGGA_1218	m6AclusterB	CGGA.mRNAseq_325	<60	286	DECEASED	Secondary	Male
CGGA_1224	m6AclusterB	CGGA.mRNAseq_325	<60	271	DECEASED	Primary	Male
CGGA_1234	m6AclusterA	CGGA.mRNAseq_325	<60	705	DECEASED	Primary	Male
CGGA_1237	m6AclusterA	CGGA.mRNAseq_325	>=60	296	DECEASED	Primary	Male
CGGA_1240	m6AclusterB	CGGA.mRNAseq_325	<60	19	DECEASED	Primary	Male
CGGA_1251	m6AclusterA	CGGA.mRNAseq_325	<60	272	DECEASED	Primary	Female
CGGA_1258	m6AclusterA	CGGA.mRNAseq_325	<60	114	DECEASED	Primary	Male
CGGA_1270	m6AclusterB	CGGA.mRNAseq_325	>=60	188	DECEASED	Primary	Female
CGGA_1271	m6AclusterA	CGGA.mRNAseq_325	<60	523	DECEASED	Recurrent	Male
CGGA_1272	m6AclusterA	CGGA.mRNAseq_325	<60	124	DECEASED	Secondary	Male
CGGA_1283	m6AclusterA	CGGA.mRNAseq_325	<60	20	DECEASED	Secondary	Male
CGGA_1285	m6AclusterB	CGGA.mRNAseq_325	<60	79	DECEASED	Recurrent	Female
CGGA_1299	m6AclusterA	CGGA.mRNAseq_325	<60	550	DECEASED	Primary	Male
CGGA_1301	m6AclusterB	CGGA.mRNAseq_325	<60	239	DECEASED	Secondary	Male
CGGA_1313	m6AclusterA	CGGA.mRNAseq_325	<60	379	DECEASED	Primary	Male
CGGA_1320	m6AclusterA	CGGA.mRNAseq_325	<60	59	DECEASED	Primary	Male
CGGA_1332	m6AclusterA	CGGA.mRNAseq_325	<60	510	LIVING	Primary	Female
CGGA_1338	m6AclusterA	CGGA.mRNAseq_325	>=60	1122	DECEASED	Primary	Female
CGGA_1342	m6AclusterA	CGGA.mRNAseq_325	<60	186	DECEASED	Primary	Male
CGGA_1343	m6AclusterA	CGGA.mRNAseq_325	<60	94	DECEASED	Recurrent	Male
CGGA_1346	m6AclusterA	CGGA.mRNAseq_325	<60	284	DECEASED	Secondary	Female
CGGA_1370	m6AclusterA	CGGA.mRNAseq_325	<60	325	LIVING	Recurrent	Male
CGGA_1393	m6AclusterA	CGGA.mRNAseq_325	<60	275	DECEASED	Secondary	Male
CGGA_272	m6AclusterA	CGGA.mRNAseq_325	<60	217	DECEASED	Secondary	Male
CGGA_274	m6AclusterA	CGGA.mRNAseq_325	<60	610	LIVING	Primary	Female
CGGA_318	m6AclusterB	CGGA.mRNAseq_325	<60	222	DECEASED	Secondary	Female
CGGA_413	m6AclusterA	CGGA.mRNAseq_325	<60	183	LIVING	Primary	Male
CGGA_483	m6AclusterA	CGGA.mRNAseq_325	<60	277	DECEASED	Primary	Female
CGGA_494	m6AclusterB	CGGA.mRNAseq_325	<60	4435	LIVING	Primary	Female
CGGA_499	m6AclusterA	CGGA.mRNAseq_325	<60	122	DECEASED	Primary	Male
CGGA_525	m6AclusterB	CGGA.mRNAseq_325	>=60	138	DECEASED	Primary	Male
CGGA_604	m6AclusterA	CGGA.mRNAseq_325	<60	381	DECEASED	Primary	Male
CGGA_624	m6AclusterA	CGGA.mRNAseq_325	<60	122	DECEASED	Recurrent	Female
CGGA_658	m6AclusterA	CGGA.mRNAseq_325	<60	372	DECEASED	Primary	Male
CGGA_669	m6AclusterB	CGGA.mRNAseq_325	<60	607	DECEASED	Recurrent	Female
CGGA_676	m6AclusterA	CGGA.mRNAseq_325	>=60	376	DECEASED	Primary	Male
CGGA_679	m6AclusterA	CGGA.mRNAseq_325	>=60	263	DECEASED	Primary	Female
CGGA_680	m6AclusterA	CGGA.mRNAseq_325	<60	2373	DECEASED	Primary	Male
CGGA_700	m6AclusterA	CGGA.mRNAseq_325	<60	170	LIVING	Primary	Female
CGGA_731	m6AclusterA	CGGA.mRNAseq_325	<60	503	DECEASED	Primary	Male
CGGA_773	m6AclusterB	CGGA.mRNAseq_325	<60	443	DECEASED	Secondary	Female
CGGA_782	m6AclusterB	CGGA.mRNAseq_325	>=60	289	DECEASED	Primary	Male
CGGA_789	m6AclusterB	CGGA.mRNAseq_325	<60	345	DECEASED	Primary	Male
CGGA_802	m6AclusterA	CGGA.mRNAseq_325	<60	681	DECEASED	Primary	Male
CGGA_804	m6AclusterB	CGGA.mRNAseq_325	<60	614	LIVING	Primary	Female
CGGA_808	m6AclusterB	CGGA.mRNAseq_325	<60	1167	LIVING	Primary	Male
CGGA_837	m6AclusterB	CGGA.mRNAseq_325	<60	432	DECEASED	Primary	Male
CGGA_842	m6AclusterB	CGGA.mRNAseq_325	>=60	204	DECEASED	Primary	Female
CGGA_848	m6AclusterA	CGGA.mRNAseq_325	<60	239	LIVING	Primary	Female
CGGA_850	m6AclusterA	CGGA.mRNAseq_325	<60	564	LIVING	Primary	Female
CGGA_859	m6AclusterB	CGGA.mRNAseq_325	<60	387	DECEASED	Primary	Male
CGGA_876	m6AclusterB	CGGA.mRNAseq_325	>=60	159	DECEASED	Primary	Female
CGGA_878	m6AclusterA	CGGA.mRNAseq_325	<60	863	DECEASED	Primary	Male
CGGA_902	m6AclusterA	CGGA.mRNAseq_325	<60	193	DECEASED	Primary	Male
CGGA_D02	m6AclusterA	CGGA.mRNAseq_325	<60	484	DECEASED	Recurrent	Male
CGGA_D03	m6AclusterB	CGGA.mRNAseq_325	<60	423	DECEASED	Primary	Male
CGGA_D09	m6AclusterA	CGGA.mRNAseq_325	<60	233	DECEASED	Primary	Male
CGGA_D26	m6AclusterB	CGGA.mRNAseq_325	<60	263	DECEASED	Recurrent	Male
CGGA_D32	m6AclusterA	CGGA.mRNAseq_325	>=60	358	DECEASED	Recurrent	Male
CGGA_D35	m6AclusterB	CGGA.mRNAseq_325	>=60	661	DECEASED	Primary	Female
CGGA_D36	m6AclusterB	CGGA.mRNAseq_325	<60	34	DECEASED	Recurrent	Male
CGGA_D37	m6AclusterA	CGGA.mRNAseq_325	<60	965	DECEASED	Primary	Male
CGGA_D51	m6AclusterB	CGGA.mRNAseq_325	>=60	135	DECEASED	Recurrent	Female
CGGA_D57	m6AclusterA	CGGA.mRNAseq_325	<60	766	DECEASED	Primary	Male
CGGA_342	m6AclusterB	CGGA.mRNAseq_325	<60	500	DECEASED	Primary	Female
CGGA_719	m6AclusterA	CGGA.mRNAseq_325	<60	101	DECEASED	Secondary	Male
CGGA_1060	m6AclusterA	CGGA.mRNAseq_325	<60	227	DECEASED	Recurrent	Male
CGGA_1068	m6AclusterA	CGGA.mRNAseq_325	<60	68	DECEASED	Secondary	Male
CGGA_1105	m6AclusterB	CGGA.mRNAseq_325	<60	609	DECEASED	Secondary	Male
CGGA_1129	m6AclusterA	CGGA.mRNAseq_325	<60	168	DECEASED	Secondary	Male
CGGA_1136	m6AclusterA	CGGA.mRNAseq_325	<60	236	DECEASED	Secondary	Female
CGGA_1170	m6AclusterA	CGGA.mRNAseq_325	<60	346	DECEASED	Secondary	Male
CGGA_1175	m6AclusterA	CGGA.mRNAseq_325	<60	441	DECEASED	Secondary	Female
CGGA_1219	m6AclusterA	CGGA.mRNAseq_325	<60	2120	DECEASED	Primary	Female
CGGA_1227	m6AclusterA	CGGA.mRNAseq_325	<60	1197	DECEASED	Recurrent	Female
CGGA_1287	m6AclusterB	CGGA.mRNAseq_325	<60	533	DECEASED	Primary	Male
CGGA_1314	m6AclusterA	CGGA.mRNAseq_325	<60	172	DECEASED	Primary	Female
CGGA_1324	m6AclusterB	CGGA.mRNAseq_325	<60	848	DECEASED	Secondary	Male
CGGA_1375	m6AclusterA	CGGA.mRNAseq_325	<60	92	DECEASED	Secondary	Female
CGGA_1381	m6AclusterA	CGGA.mRNAseq_325	<60	46	DECEASED	Recurrent	Female
CGGA_1384	m6AclusterA	CGGA.mRNAseq_325	<60	191	DECEASED	Primary	Female
CGGA_1394	m6AclusterB	CGGA.mRNAseq_325	<60	139	DECEASED	Recurrent	Male
CGGA_1409	m6AclusterB	CGGA.mRNAseq_325	<60	2727	LIVING	Primary	Female
CGGA_1412	m6AclusterB	CGGA.mRNAseq_325	<60	296	DECEASED	Secondary	Female
CGGA_374	m6AclusterA	CGGA.mRNAseq_325	<60	493	DECEASED	Secondary	Male
CGGA_491	m6AclusterA	CGGA.mRNAseq_325	<60	1074	DECEASED	Primary	Female
CGGA_545	m6AclusterA	CGGA.mRNAseq_325	<60	555	DECEASED	Recurrent	Female
CGGA_710	m6AclusterB	CGGA.mRNAseq_325	<60	660	DECEASED	Primary	Male
CGGA_747	m6AclusterB	CGGA.mRNAseq_325	<60	970	DECEASED	Primary	Male
CGGA_761	m6AclusterA	CGGA.mRNAseq_325	<60	1840	DECEASED	Primary	Male
CGGA_822	m6AclusterB	CGGA.mRNAseq_325	<60	2237	DECEASED	Secondary	Male
CGGA_899	m6AclusterA	CGGA.mRNAseq_325	<60	231	DECEASED	Recurrent	Male
CGGA_D34	m6AclusterA	CGGA.mRNAseq_325	<60	147	DECEASED	Secondary	Male
CGGA_D38	m6AclusterB	CGGA.mRNAseq_325	<60	689	DECEASED	Recurrent	Female
CGGA_D59	m6AclusterB	CGGA.mRNAseq_325	<60	NA	NA	Secondary	Female
CGGA_518	m6AclusterA	CGGA.mRNAseq_325	<60	212	DECEASED	Secondary	Male
CGGA_J100	m6AclusterA	CGGA.mRNAseq_325	<60	NA	NA	Recurrent	Male
CGGA_1008	m6AclusterA	CGGA.mRNAseq_325	<60	315	DECEASED	Primary	Female
CGGA_1053	m6AclusterB	CGGA.mRNAseq_325	>=60	370	DECEASED	Primary	Female
CGGA_1070	m6AclusterB	CGGA.mRNAseq_325	<60	333	DECEASED	Primary	Male
CGGA_1073	m6AclusterB	CGGA.mRNAseq_325	<60	270	DECEASED	Primary	Female
CGGA_1074	m6AclusterB	CGGA.mRNAseq_325	<60	86	DECEASED	Primary	Male
CGGA_1099	m6AclusterA	CGGA.mRNAseq_325	>=60	122	DECEASED	Secondary	Male
CGGA_1114	m6AclusterA	CGGA.mRNAseq_325	<60	460	DECEASED	Primary	Male
CGGA_1116	m6AclusterA	CGGA.mRNAseq_325	<60	248	DECEASED	Recurrent	Female
CGGA_1119	m6AclusterA	CGGA.mRNAseq_325	<60	422	DECEASED	Recurrent	Male
CGGA_1197	m6AclusterA	CGGA.mRNAseq_325	<60	942	DECEASED	Secondary	Male
CGGA_1275	m6AclusterB	CGGA.mRNAseq_325	>=60	183	DECEASED	Primary	Male
CGGA_1450	m6AclusterB	CGGA.mRNAseq_325	<60	957	DECEASED	Secondary	Male
CGGA_1460	m6AclusterA	CGGA.mRNAseq_325	<60	209	DECEASED	Secondary	Male
CGGA_1475	m6AclusterA	CGGA.mRNAseq_325	<60	182	DECEASED	Secondary	Male
CGGA_759	m6AclusterB	CGGA.mRNAseq_325	<60	1263	DECEASED	Primary	Male
CGGA_D30	m6AclusterB	CGGA.mRNAseq_325	>=60	215	DECEASED	Primary	Male
CGGA_1017	m6AclusterA	CGGA.mRNAseq_693	<60	768	DECEASED	Primary	Female
CGGA_1036	m6AclusterB	CGGA.mRNAseq_693	<60	806	DECEASED	Primary	Male
CGGA_1041	m6AclusterA	CGGA.mRNAseq_693	<60	3593	LIVING	Primary	Male
CGGA_1075	m6AclusterA	CGGA.mRNAseq_693	>=60	398	DECEASED	Primary	Male
CGGA_1086	m6AclusterA	CGGA.mRNAseq_693	>=60	1977	DECEASED	Primary	Female
CGGA_1103	m6AclusterA	CGGA.mRNAseq_693	<60	585	DECEASED	Primary	Female
CGGA_1106	m6AclusterA	CGGA.mRNAseq_693	<60	420	DECEASED	Primary	Male
CGGA_1130	m6AclusterB	CGGA.mRNAseq_693	<60	402	DECEASED	Recurrent	Female
CGGA_1134	m6AclusterA	CGGA.mRNAseq_693	<60	59	DECEASED	Primary	Female
CGGA_1135	m6AclusterB	CGGA.mRNAseq_693	<60	1244	DECEASED	Primary	Male
CGGA_1138	m6AclusterA	CGGA.mRNAseq_693	<60	411	DECEASED	Primary	Male
CGGA_1142	m6AclusterA	CGGA.mRNAseq_693	>=60	1005	DECEASED	Primary	Male
CGGA_1164	m6AclusterB	CGGA.mRNAseq_693	<60	1022	DECEASED	Recurrent	Female
CGGA_1172	m6AclusterB	CGGA.mRNAseq_693	<60	3131	LIVING	Primary	Female
CGGA_120	m6AclusterB	CGGA.mRNAseq_693	<60	288	DECEASED	Recurrent	Male
CGGA_1208	m6AclusterA	CGGA.mRNAseq_693	<60	161	DECEASED	Recurrent	Male
CGGA_1236	m6AclusterA	CGGA.mRNAseq_693	<60	191	DECEASED	Primary	Female
CGGA_1248	m6AclusterA	CGGA.mRNAseq_693	<60	138	DECEASED	Recurrent	Male
CGGA_1255	m6AclusterA	CGGA.mRNAseq_693	<60	118	DECEASED	Recurrent	Male
CGGA_1256	m6AclusterB	CGGA.mRNAseq_693	<60	2557	LIVING	Primary	Female
CGGA_1257	m6AclusterB	CGGA.mRNAseq_693	<60	192	DECEASED	Recurrent	Male
CGGA_1260	m6AclusterB	CGGA.mRNAseq_693	<60	177	DECEASED	Recurrent	Male
CGGA_1262	m6AclusterB	CGGA.mRNAseq_693	>=60	166	DECEASED	Recurrent	Female
CGGA_1282	m6AclusterA	CGGA.mRNAseq_693	<60	1116	DECEASED	Primary	Female
CGGA_1325	m6AclusterA	CGGA.mRNAseq_693	<60	NA	NA	Recurrent	Male
CGGA_1326	m6AclusterB	CGGA.mRNAseq_693	<60	322	DECEASED	Primary	Male
CGGA_1337	m6AclusterB	CGGA.mRNAseq_693	>=60	2172	DECEASED	Recurrent	Male
CGGA_1353	m6AclusterA	CGGA.mRNAseq_693	>=60	1022	DECEASED	Primary	Male
CGGA_1354	m6AclusterA	CGGA.mRNAseq_693	<60	530	DECEASED	Primary	Female
CGGA_1365	m6AclusterA	CGGA.mRNAseq_693	<60	253	DECEASED	Primary	Male
CGGA_1371	m6AclusterB	CGGA.mRNAseq_693	>=60	2791	LIVING	Primary	Male
CGGA_1378	m6AclusterA	CGGA.mRNAseq_693	<60	378	DECEASED	Primary	Male
CGGA_1380	m6AclusterB	CGGA.mRNAseq_693	<60	291	DECEASED	Primary	Male
CGGA_1382	m6AclusterA	CGGA.mRNAseq_693	<60	284	DECEASED	Primary	Male
CGGA_1387	m6AclusterA	CGGA.mRNAseq_693	<60	90	DECEASED	Recurrent	Male
CGGA_139	m6AclusterB	CGGA.mRNAseq_693	<60	694	DECEASED	Primary	Male
CGGA_1391	m6AclusterB	CGGA.mRNAseq_693	>=60	426	LIVING	Primary	Male
CGGA_1392	m6AclusterB	CGGA.mRNAseq_693	>=60	473	DECEASED	Primary	Male
CGGA_1402	m6AclusterB	CGGA.mRNAseq_693	<60	2742	LIVING	Primary	Male
CGGA_1403	m6AclusterA	CGGA.mRNAseq_693	<60	679	DECEASED	Primary	Female
CGGA_1410	m6AclusterA	CGGA.mRNAseq_693	<60	825	DECEASED	Primary	Female
CGGA_1415	m6AclusterB	CGGA.mRNAseq_693	<60	2719	LIVING	Recurrent	Female
CGGA_1418	m6AclusterA	CGGA.mRNAseq_693	>=60	287	DECEASED	Primary	Female
CGGA_1419	m6AclusterB	CGGA.mRNAseq_693	<60	249	DECEASED	Recurrent	Male
CGGA_1420	m6AclusterB	CGGA.mRNAseq_693	>=60	364	DECEASED	Primary	Male
CGGA_1422	m6AclusterA	CGGA.mRNAseq_693	>=60	204	DECEASED	Primary	Male
CGGA_1425	m6AclusterA	CGGA.mRNAseq_693	<60	640	DECEASED	Primary	Female
CGGA_1426	m6AclusterA	CGGA.mRNAseq_693	<60	133	DECEASED	Primary	Female
CGGA_1429	m6AclusterA	CGGA.mRNAseq_693	<60	2685	LIVING	Recurrent	Female
CGGA_1430	m6AclusterA	CGGA.mRNAseq_693	<60	162	DECEASED	Recurrent	Female
CGGA_1433	m6AclusterB	CGGA.mRNAseq_693	>=60	394	DECEASED	Primary	Female
CGGA_1441	m6AclusterB	CGGA.mRNAseq_693	>=60	1882	DECEASED	Primary	Male
CGGA_1444	m6AclusterA	CGGA.mRNAseq_693	>=60	378	DECEASED	Primary	Female
CGGA_1451	m6AclusterB	CGGA.mRNAseq_693	<60	438	DECEASED	Primary	Female
CGGA_1452	m6AclusterB	CGGA.mRNAseq_693	<60	468	DECEASED	Primary	Male
CGGA_1457	m6AclusterB	CGGA.mRNAseq_693	>=60	312	DECEASED	Primary	Male
CGGA_1461	m6AclusterA	CGGA.mRNAseq_693	>=60	226	DECEASED	Primary	Female
CGGA_1462	m6AclusterA	CGGA.mRNAseq_693	<60	174	DECEASED	Primary	Male
CGGA_1467	m6AclusterA	CGGA.mRNAseq_693	<60	866	DECEASED	Primary	Male
CGGA_1472	m6AclusterB	CGGA.mRNAseq_693	<60	1025	DECEASED	Primary	Male
CGGA_1476	m6AclusterB	CGGA.mRNAseq_693	<60	299	DECEASED	Primary	Female
CGGA_1478	m6AclusterA	CGGA.mRNAseq_693	>=60	542	DECEASED	Primary	Female
CGGA_1480	m6AclusterB	CGGA.mRNAseq_693	<60	405	DECEASED	Recurrent	Male
CGGA_1481	m6AclusterA	CGGA.mRNAseq_693	<60	131	DECEASED	Primary	Male
CGGA_1486	m6AclusterA	CGGA.mRNAseq_693	<60	184	DECEASED	Primary	Male
CGGA_1491	m6AclusterA	CGGA.mRNAseq_693	<60	246	DECEASED	Primary	Male
CGGA_1492	m6AclusterA	CGGA.mRNAseq_693	<60	268	DECEASED	Recurrent	Female
CGGA_1494	m6AclusterA	CGGA.mRNAseq_693	<60	269	DECEASED	Primary	Male
CGGA_1496	m6AclusterA	CGGA.mRNAseq_693	<60	330	DECEASED	Recurrent	Female
CGGA_1498	m6AclusterA	CGGA.mRNAseq_693	>=60	NA	NA	Primary	Male
CGGA_1500	m6AclusterB	CGGA.mRNAseq_693	<60	108	DECEASED	Primary	Female
CGGA_1501	m6AclusterB	CGGA.mRNAseq_693	<60	222	DECEASED	Primary	Male
CGGA_1503	m6AclusterA	CGGA.mRNAseq_693	<60	777	DECEASED	Primary	Male
CGGA_1505	m6AclusterA	CGGA.mRNAseq_693	<60	172	DECEASED	Recurrent	Male
CGGA_1507	m6AclusterB	CGGA.mRNAseq_693	<60	715	DECEASED	Recurrent	Female
CGGA_1520	m6AclusterB	CGGA.mRNAseq_693	>=60	297	DECEASED	Recurrent	Female
CGGA_1521	m6AclusterA	CGGA.mRNAseq_693	>=60	205	DECEASED	Primary	Female
CGGA_1529	m6AclusterA	CGGA.mRNAseq_693	>=60	583	DECEASED	Primary	Male
CGGA_1534	m6AclusterB	CGGA.mRNAseq_693	<60	27	DECEASED	Primary	Female
CGGA_1535	m6AclusterB	CGGA.mRNAseq_693	<60	232	DECEASED	Recurrent	Male
CGGA_1537	m6AclusterB	CGGA.mRNAseq_693	>=60	97	DECEASED	Primary	Male
CGGA_1538	m6AclusterA	CGGA.mRNAseq_693	<60	247	DECEASED	Recurrent	Female
CGGA_1539	m6AclusterA	CGGA.mRNAseq_693	>=60	2462	LIVING	Primary	Male
CGGA_1541	m6AclusterB	CGGA.mRNAseq_693	<60	67	DECEASED	Recurrent	Female
CGGA_1542	m6AclusterA	CGGA.mRNAseq_693	<60	184	LIVING	Primary	Male
CGGA_1543	m6AclusterB	CGGA.mRNAseq_693	<60	723	DECEASED	Primary	Male
CGGA_1546	m6AclusterB	CGGA.mRNAseq_693	<60	223	DECEASED	Primary	Male
CGGA_1548	m6AclusterB	CGGA.mRNAseq_693	<60	1054	DECEASED	Primary	Male
CGGA_1551	m6AclusterB	CGGA.mRNAseq_693	<60	347	DECEASED	Primary	Female
CGGA_1558	m6AclusterB	CGGA.mRNAseq_693	>=60	130	DECEASED	Recurrent	Male
CGGA_1559	m6AclusterB	CGGA.mRNAseq_693	>=60	603	DECEASED	Primary	Male
CGGA_1560	m6AclusterB	CGGA.mRNAseq_693	<60	459	DECEASED	Primary	Female
CGGA_1564	m6AclusterA	CGGA.mRNAseq_693	<60	190	DECEASED	Primary	Male
CGGA_1571	m6AclusterB	CGGA.mRNAseq_693	<60	412	LIVING	Primary	Female
CGGA_1572	m6AclusterB	CGGA.mRNAseq_693	>=60	160	DECEASED	Recurrent	Female
CGGA_1586	m6AclusterB	CGGA.mRNAseq_693	<60	232	DECEASED	Primary	Female
CGGA_1595	m6AclusterB	CGGA.mRNAseq_693	<60	2363	LIVING	Primary	Female
CGGA_1596	m6AclusterB	CGGA.mRNAseq_693	>=60	205	DECEASED	Primary	Male
CGGA_1597	m6AclusterB	CGGA.mRNAseq_693	<60	174	DECEASED	Primary	Male
CGGA_1601	m6AclusterB	CGGA.mRNAseq_693	>=60	710	DECEASED	Primary	Male
CGGA_1603	m6AclusterB	CGGA.mRNAseq_693	<60	356	DECEASED	Recurrent	Male
CGGA_1604	m6AclusterB	CGGA.mRNAseq_693	<60	740	DECEASED	Recurrent	Male
CGGA_1605	m6AclusterB	CGGA.mRNAseq_693	<60	321	DECEASED	Recurrent	Male
CGGA_1611	m6AclusterA	CGGA.mRNAseq_693	<60	1158	DECEASED	Recurrent	Female
CGGA_1612	m6AclusterB	CGGA.mRNAseq_693	>=60	718	DECEASED	Primary	Male
CGGA_1613	m6AclusterB	CGGA.mRNAseq_693	<60	250	LIVING	Primary	Male
CGGA_1615	m6AclusterB	CGGA.mRNAseq_693	<60	586	DECEASED	Recurrent	Male
CGGA_1624	m6AclusterA	CGGA.mRNAseq_693	<60	87	DECEASED	Recurrent	Female
CGGA_1626	m6AclusterB	CGGA.mRNAseq_693	>=60	696	DECEASED	Primary	Male
CGGA_1631	m6AclusterB	CGGA.mRNAseq_693	<60	221	DECEASED	Recurrent	Female
CGGA_1634	m6AclusterB	CGGA.mRNAseq_693	<60	366	DECEASED	Primary	Female
CGGA_1635	m6AclusterA	CGGA.mRNAseq_693	<60	332	DECEASED	Primary	Female
CGGA_1641	m6AclusterB	CGGA.mRNAseq_693	<60	291	DECEASED	Recurrent	Female
CGGA_1643	m6AclusterB	CGGA.mRNAseq_693	<60	NA	NA	Primary	Female
CGGA_1644	m6AclusterB	CGGA.mRNAseq_693	<60	173	DECEASED	Primary	Male
CGGA_1650	m6AclusterA	CGGA.mRNAseq_693	<60	1283	DECEASED	Primary	Male
CGGA_1654	m6AclusterB	CGGA.mRNAseq_693	>=60	NA	NA	Primary	Male
CGGA_1656	m6AclusterA	CGGA.mRNAseq_693	<60	149	DECEASED	Recurrent	Male
CGGA_1658	m6AclusterB	CGGA.mRNAseq_693	>=60	1574	DECEASED	Recurrent	Female
CGGA_1659	m6AclusterA	CGGA.mRNAseq_693	<60	387	DECEASED	Recurrent	Male
CGGA_1663	m6AclusterB	CGGA.mRNAseq_693	>=60	290	DECEASED	Recurrent	Male
CGGA_1666	m6AclusterA	CGGA.mRNAseq_693	>=60	249	DECEASED	Primary	Male
CGGA_1678	m6AclusterA	CGGA.mRNAseq_693	<60	657	DECEASED	Primary	Male
CGGA_1681	m6AclusterB	CGGA.mRNAseq_693	<60	346	DECEASED	Primary	Female
CGGA_1682	m6AclusterA	CGGA.mRNAseq_693	>=60	345	DECEASED	Recurrent	Male
CGGA_1684	m6AclusterB	CGGA.mRNAseq_693	<60	NA	NA	Primary	Male
CGGA_1687	m6AclusterB	CGGA.mRNAseq_693	<60	2118	LIVING	Primary	Male
CGGA_1690	m6AclusterA	CGGA.mRNAseq_693	>=60	592	DECEASED	Primary	Male
CGGA_1694	m6AclusterB	CGGA.mRNAseq_693	<60	624	DECEASED	Primary	Male
CGGA_1697	m6AclusterB	CGGA.mRNAseq_693	<60	89	DECEASED	Recurrent	Female
CGGA_1698	m6AclusterB	CGGA.mRNAseq_693	<60	388	DECEASED	Primary	Female
CGGA_1699	m6AclusterA	CGGA.mRNAseq_693	<60	2088	LIVING	Primary	Female
CGGA_1702	m6AclusterA	CGGA.mRNAseq_693	<60	168	DECEASED	Recurrent	Female
CGGA_1706	m6AclusterB	CGGA.mRNAseq_693	>=60	2068	LIVING	Primary	Male
CGGA_1708	m6AclusterA	CGGA.mRNAseq_693	<60	1122	DECEASED	Primary	Female
CGGA_1709	m6AclusterA	CGGA.mRNAseq_693	<60	415	DECEASED	Primary	Male
CGGA_1713	m6AclusterA	CGGA.mRNAseq_693	>=60	332	DECEASED	Primary	Male
CGGA_1722	m6AclusterA	CGGA.mRNAseq_693	>=60	349	DECEASED	Primary	Female
CGGA_1727	m6AclusterB	CGGA.mRNAseq_693	<60	1980	LIVING	Primary	Male
CGGA_1728	m6AclusterA	CGGA.mRNAseq_693	<60	917	DECEASED	Primary	Male
CGGA_1729	m6AclusterB	CGGA.mRNAseq_693	<60	244	DECEASED	Recurrent	Male
CGGA_1735	m6AclusterA	CGGA.mRNAseq_693	<60	813	DECEASED	Primary	Male
CGGA_1736	m6AclusterB	CGGA.mRNAseq_693	<60	938	DECEASED	Primary	Female
CGGA_1740	m6AclusterB	CGGA.mRNAseq_693	<60	363	DECEASED	Primary	Female
CGGA_1744	m6AclusterB	CGGA.mRNAseq_693	<60	1936	LIVING	Primary	Male
CGGA_1749	m6AclusterA	CGGA.mRNAseq_693	<60	401	DECEASED	Primary	Female
CGGA_1750	m6AclusterB	CGGA.mRNAseq_693	<60	250	DECEASED	Primary	Female
CGGA_1758	m6AclusterA	CGGA.mRNAseq_693	<60	414	DECEASED	Primary	Female
CGGA_1764	m6AclusterB	CGGA.mRNAseq_693	<60	710	DECEASED	Primary	Male
CGGA_1767	m6AclusterA	CGGA.mRNAseq_693	>=60	86	DECEASED	Primary	Male
CGGA_1769	m6AclusterA	CGGA.mRNAseq_693	<60	1854	LIVING	Primary	Female
CGGA_1770	m6AclusterA	CGGA.mRNAseq_693	<60	267	DECEASED	Recurrent	Female
CGGA_1773	m6AclusterA	CGGA.mRNAseq_693	<60	104	DECEASED	Recurrent	Female
CGGA_1776	m6AclusterB	CGGA.mRNAseq_693	<60	259	DECEASED	Recurrent	Male
CGGA_1780	m6AclusterA	CGGA.mRNAseq_693	<60	1826	LIVING	Primary	Female
CGGA_1785	m6AclusterA	CGGA.mRNAseq_693	<60	329	DECEASED	Recurrent	Male
CGGA_1807	m6AclusterA	CGGA.mRNAseq_693	>=60	247	DECEASED	Primary	Female
CGGA_1811	m6AclusterB	CGGA.mRNAseq_693	>=60	304	DECEASED	Recurrent	Male
CGGA_1812	m6AclusterA	CGGA.mRNAseq_693	>=60	780	DECEASED	Primary	Male
CGGA_1814	m6AclusterA	CGGA.mRNAseq_693	<60	221	DECEASED	Recurrent	Female
CGGA_1815	m6AclusterA	CGGA.mRNAseq_693	<60	185	DECEASED	Recurrent	Female
CGGA_1817	m6AclusterB	CGGA.mRNAseq_693	>=60	399	DECEASED	Primary	Female
CGGA_1819	m6AclusterB	CGGA.mRNAseq_693	<60	1005	DECEASED	Primary	Male
CGGA_1820	m6AclusterA	CGGA.mRNAseq_693	<60	77	DECEASED	Recurrent	Female
CGGA_1826	m6AclusterA	CGGA.mRNAseq_693	>=60	44	DECEASED	Primary	Female
CGGA_1833	m6AclusterA	CGGA.mRNAseq_693	>=60	494	DECEASED	Primary	Female
CGGA_1840	m6AclusterB	CGGA.mRNAseq_693	<60	1179	LIVING	Primary	Female
CGGA_1857	m6AclusterB	CGGA.mRNAseq_693	<60	157	DECEASED	Recurrent	Male
CGGA_1865	m6AclusterA	CGGA.mRNAseq_693	<60	89	DECEASED	Recurrent	Female
CGGA_1866	m6AclusterA	CGGA.mRNAseq_693	>=60	127	DECEASED	Primary	Male
CGGA_1870	m6AclusterB	CGGA.mRNAseq_693	>=60	1556	LIVING	Primary	Male
CGGA_1886	m6AclusterA	CGGA.mRNAseq_693	<60	338	DECEASED	Recurrent	Male
CGGA_1899	m6AclusterB	CGGA.mRNAseq_693	<60	176	DECEASED	Recurrent	Male
CGGA_1901	m6AclusterB	CGGA.mRNAseq_693	>=60	540	DECEASED	Primary	Male
CGGA_1908	m6AclusterA	CGGA.mRNAseq_693	<60	298	DECEASED	Recurrent	Female
CGGA_1911	m6AclusterA	CGGA.mRNAseq_693	<60	1451	LIVING	Recurrent	Male
CGGA_1912	m6AclusterB	CGGA.mRNAseq_693	<60	507	DECEASED	Recurrent	Male
CGGA_1916	m6AclusterA	CGGA.mRNAseq_693	<60	NA	NA	Primary	Female
CGGA_1946	m6AclusterB	CGGA.mRNAseq_693	<60	142	DECEASED	Recurrent	Female
CGGA_1953	m6AclusterB	CGGA.mRNAseq_693	<60	73	DECEASED	Recurrent	Male
CGGA_1955	m6AclusterB	CGGA.mRNAseq_693	<60	457	DECEASED	Recurrent	Male
CGGA_1972	m6AclusterB	CGGA.mRNAseq_693	<60	1291	LIVING	Recurrent	Male
CGGA_1976	m6AclusterB	CGGA.mRNAseq_693	<60	73	DECEASED	Recurrent	Female
CGGA_1985	m6AclusterB	CGGA.mRNAseq_693	<60	380	DECEASED	Recurrent	Male
CGGA_2003	m6AclusterB	CGGA.mRNAseq_693	<60	780	DECEASED	Recurrent	Male
CGGA_2008	m6AclusterB	CGGA.mRNAseq_693	<60	44	DECEASED	Recurrent	Male
CGGA_2024	m6AclusterB	CGGA.mRNAseq_693	<60	328	DECEASED	Recurrent	Female
CGGA_2038	m6AclusterB	CGGA.mRNAseq_693	<60	NA	DECEASED	Recurrent	Male
CGGA_2039	m6AclusterB	CGGA.mRNAseq_693	<60	702	LIVING	Recurrent	Male
CGGA_2047	m6AclusterA	CGGA.mRNAseq_693	>=60	598	DECEASED	Recurrent	Female
CGGA_2053	m6AclusterB	CGGA.mRNAseq_693	<60	1031	LIVING	Recurrent	Male
CGGA_2056	m6AclusterA	CGGA.mRNAseq_693	<60	1019	LIVING	Recurrent	Female
CGGA_2062	m6AclusterA	CGGA.mRNAseq_693	>=60	41	DECEASED	Recurrent	Female
CGGA_2075	m6AclusterB	CGGA.mRNAseq_693	>=60	266	DECEASED	Recurrent	Male
CGGA_2078	m6AclusterB	CGGA.mRNAseq_693	>=60	280	DECEASED	Recurrent	Female
CGGA_2082	m6AclusterB	CGGA.mRNAseq_693	<60	571	LIVING	Recurrent	Male
CGGA_2088	m6AclusterB	CGGA.mRNAseq_693	<60	NA	NA	Recurrent	Female
CGGA_2106	m6AclusterB	CGGA.mRNAseq_693	<60	892	LIVING	Recurrent	Female
CGGA_2115	m6AclusterB	CGGA.mRNAseq_693	<60	171	DECEASED	Recurrent	Female
CGGA_487	m6AclusterA	CGGA.mRNAseq_693	<60	156	DECEASED	Recurrent	Male
CGGA_509	m6AclusterA	CGGA.mRNAseq_693	<60	623	DECEASED	Primary	Male
CGGA_530	m6AclusterA	CGGA.mRNAseq_693	<60	506	DECEASED	Recurrent	Female
CGGA_568	m6AclusterB	CGGA.mRNAseq_693	<60	285	DECEASED	Recurrent	Male
CGGA_777	m6AclusterA	CGGA.mRNAseq_693	<60	146	DECEASED	Recurrent	Male
CGGA_831	m6AclusterA	CGGA.mRNAseq_693	<60	546	DECEASED	Primary	Female
CGGA_869	m6AclusterB	CGGA.mRNAseq_693	<60	537	LIVING	Recurrent	Female
CGGA_D53	m6AclusterA	CGGA.mRNAseq_693	<60	NA	NA	Recurrent	Male
CGGA_P100	m6AclusterA	CGGA.mRNAseq_693	>=60	268	DECEASED	Primary	Male
CGGA_P102	m6AclusterA	CGGA.mRNAseq_693	<60	1269	DECEASED	Primary	Male
CGGA_P106	m6AclusterA	CGGA.mRNAseq_693	<60	71	DECEASED	Recurrent	Male
CGGA_P109	m6AclusterB	CGGA.mRNAseq_693	<60	407	DECEASED	Recurrent	Male
CGGA_P112	m6AclusterB	CGGA.mRNAseq_693	>=60	834	DECEASED	Primary	Male
CGGA_P116	m6AclusterA	CGGA.mRNAseq_693	<60	305	DECEASED	Primary	Male
CGGA_P136	m6AclusterA	CGGA.mRNAseq_693	<60	842	DECEASED	Primary	Female
CGGA_P143	m6AclusterA	CGGA.mRNAseq_693	>=60	261	DECEASED	Primary	Female
CGGA_P15	m6AclusterB	CGGA.mRNAseq_693	<60	723	DECEASED	Primary	Male
CGGA_P154	m6AclusterB	CGGA.mRNAseq_693	<60	NA	NA	Primary	Male
CGGA_P16	m6AclusterA	CGGA.mRNAseq_693	<60	NA	NA	Primary	Male
CGGA_P160	m6AclusterA	CGGA.mRNAseq_693	>=60	219	DECEASED	Primary	Female
CGGA_P164	m6AclusterA	CGGA.mRNAseq_693	<60	1553	LIVING	Primary	Male
CGGA_P175	m6AclusterA	CGGA.mRNAseq_693	<60	183	DECEASED	Recurrent	Male
CGGA_P178	m6AclusterA	CGGA.mRNAseq_693	<60	1442	LIVING	Primary	Female
CGGA_P180	m6AclusterA	CGGA.mRNAseq_693	<60	260	DECEASED	Primary	Male
CGGA_P182	m6AclusterA	CGGA.mRNAseq_693	<60	1512	LIVING	Recurrent	Female
CGGA_P199	m6AclusterB	CGGA.mRNAseq_693	>=60	203	DECEASED	Recurrent	Male
CGGA_P205	m6AclusterA	CGGA.mRNAseq_693	>=60	583	DECEASED	Primary	Male
CGGA_P22	m6AclusterB	CGGA.mRNAseq_693	>=60	406	DECEASED	Primary	Male
CGGA_P25	m6AclusterA	CGGA.mRNAseq_693	>=60	147	DECEASED	Primary	Male
CGGA_P28	m6AclusterA	CGGA.mRNAseq_693	>=60	107	DECEASED	Primary	Male
CGGA_P280	m6AclusterB	CGGA.mRNAseq_693	<60	1342	LIVING	Recurrent	Female
CGGA_P283	m6AclusterA	CGGA.mRNAseq_693	<60	1331	LIVING	Recurrent	Male
CGGA_P295	m6AclusterB	CGGA.mRNAseq_693	<60	273	DECEASED	Recurrent	Male
CGGA_P335	m6AclusterB	CGGA.mRNAseq_693	<60	1203	LIVING	Recurrent	Male
CGGA_P385	m6AclusterB	CGGA.mRNAseq_693	<60	1112	LIVING	Recurrent	Male
CGGA_P401	m6AclusterB	CGGA.mRNAseq_693	<60	788	DECEASED	Recurrent	Male
CGGA_P411	m6AclusterA	CGGA.mRNAseq_693	<60	440	DECEASED	Recurrent	Female
CGGA_P415	m6AclusterB	CGGA.mRNAseq_693	<60	195	DECEASED	Recurrent	Female
CGGA_P499	m6AclusterB	CGGA.mRNAseq_693	>=60	NA	NA	Recurrent	Female
CGGA_P512	m6AclusterA	CGGA.mRNAseq_693	<60	541	DECEASED	Recurrent	Male
CGGA_P585	m6AclusterB	CGGA.mRNAseq_693	<60	344	DECEASED	Recurrent	Male
CGGA_P596	m6AclusterB	CGGA.mRNAseq_693	>=60	777	LIVING	Recurrent	Female
CGGA_P609	m6AclusterA	CGGA.mRNAseq_693	<60	726	LIVING	Primary	Female
CGGA_P610	m6AclusterB	CGGA.mRNAseq_693	>=60	345	DECEASED	Recurrent	Male
CGGA_P619	m6AclusterB	CGGA.mRNAseq_693	>=60	236	DECEASED	Recurrent	Female
CGGA_P625	m6AclusterA	CGGA.mRNAseq_693	<60	161	DECEASED	Recurrent	Female
CGGA_P7	m6AclusterA	CGGA.mRNAseq_693	<60	110	DECEASED	Recurrent	Male
CGGA_P87	m6AclusterA	CGGA.mRNAseq_693	<60	240	DECEASED	Recurrent	Male
CGGA_P89	m6AclusterA	CGGA.mRNAseq_693	<60	294	DECEASED	Recurrent	Male
CGGA_P99	m6AclusterB	CGGA.mRNAseq_693	<60	679	LIVING	Recurrent	Male
TCGA-02-0099-01	m6AclusterA	TCGA_Agilent1	<60	104.4	DECEASED	Primary	Male
TCGA-06-0150-01	m6AclusterB	TCGA_Agilent1	<60	583.5	DECEASED	Primary	Male
TCGA-06-0142-01	m6AclusterB	TCGA_Agilent1	>=60	66	DECEASED	Primary	Male
TCGA-06-0178-01	m6AclusterB	TCGA_Agilent1	<60	2642.1	DECEASED	Primary	Male
TCGA-02-0011-01	m6AclusterA	TCGA_Agilent1	<60	621	DECEASED	Primary	Female
TCGA-06-0125-01	m6AclusterA	TCGA_Agilent1	>=60	1427.1	DECEASED	Primary	Female
TCGA-06-0141-01	m6AclusterB	TCGA_Agilent1	>=60	308.4	DECEASED	Primary	Male
TCGA-06-0132-01	m6AclusterB	TCGA_Agilent1	<60	759.9	DECEASED	Primary	Male
TCGA-06-0174-01	m6AclusterA	TCGA_Agilent1	<60	96.6	DECEASED	Primary	Male
TCGA-02-0064-01	m6AclusterA	TCGA_Agilent1	<60	591.3	DECEASED	Primary	Male
TCGA-06-0171-01	m6AclusterB	TCGA_Agilent1	>=60	393.3	DECEASED	Primary	Male
TCGA-06-0211-01	m6AclusterA	TCGA_Agilent1	<60	354.9	DECEASED	Primary	Male
TCGA-06-0122-01	m6AclusterB	TCGA_Agilent1	>=60	184.2	DECEASED	Primary	Female
TCGA-02-0014-01	m6AclusterA	TCGA_Agilent1	<60	2475.6	DECEASED	Primary	Male
TCGA-02-0052-01	m6AclusterB	TCGA_Agilent1	<60	377.4	DECEASED	Primary	Male
TCGA-06-0219-01	m6AclusterB	TCGA_Agilent1	>=60	21.6	DECEASED	Primary	Male
TCGA-06-0157-01	m6AclusterA	TCGA_Agilent1	>=60	95.7	DECEASED	Primary	Female
TCGA-02-0114-01	m6AclusterA	TCGA_Agilent1	<60	2997	DECEASED	Primary	Female
TCGA-06-0145-01	m6AclusterB	TCGA_Agilent1	<60	69.9	DECEASED	Primary	Female
TCGA-06-0124-01	m6AclusterB	TCGA_Agilent1	>=60	611.1	DECEASED	Primary	Male
TCGA-02-0038-01	m6AclusterB	TCGA_Agilent1	<60	321.3	DECEASED	Primary	Female
TCGA-06-0201-01	m6AclusterB	TCGA_Agilent1	<60	11.7	DECEASED	Primary	Female
TCGA-02-0116-01	m6AclusterA	TCGA_Agilent1	<60	1467.6	DECEASED	Primary	Male
TCGA-02-0021-01	m6AclusterA	TCGA_Agilent1	<60	2328	DECEASED	Primary	Female
TCGA-06-0154-01	m6AclusterB	TCGA_Agilent1	<60	417.9	DECEASED	Primary	Male
TCGA-02-0010-01	m6AclusterA	TCGA_Agilent1	<60	1061.4	DECEASED	Primary	Female
TCGA-06-0195-01	m6AclusterB	TCGA_Agilent1	>=60	221.7	DECEASED	Primary	Male
TCGA-02-0057-01	m6AclusterA	TCGA_Agilent1	>=60	595.2	DECEASED	Primary	Female
TCGA-06-0190-01	m6AclusterA	TCGA_Agilent1	>=60	312.3	DECEASED	Primary	Male
TCGA-06-0173-01	m6AclusterA	TCGA_Agilent1	>=60	134.1	DECEASED	Primary	Female
TCGA-06-0158-01	m6AclusterA	TCGA_Agilent1	>=60	324.3	DECEASED	Primary	Male
TCGA-02-0069-01	m6AclusterA	TCGA_Agilent1	<60	860.4	LIVING	Primary	Female
TCGA-02-0115-01	m6AclusterB	TCGA_Agilent1	<60	469.2	DECEASED	Primary	Male
TCGA-06-0208-01	m6AclusterB	TCGA_Agilent1	<60	252.3	DECEASED	Primary	Female
TCGA-06-0126-01	m6AclusterA	TCGA_Agilent1	>=60	207.9	DECEASED	Primary	Male
TCGA-02-0006-01	m6AclusterB	TCGA_Agilent1	<60	549.9	DECEASED	Primary	Female
TCGA-02-0089-01	m6AclusterB	TCGA_Agilent1	<60	508.5	DECEASED	Primary	Male
TCGA-06-0188-01	m6AclusterA	TCGA_Agilent1	>=60	1336.5	DECEASED	Primary	Male
TCGA-02-0107-01	m6AclusterB	TCGA_Agilent1	<60	529.2	DECEASED	Primary	Male
TCGA-06-0128-01	m6AclusterB	TCGA_Agilent1	>=60	681	DECEASED	Primary	Male
TCGA-02-0060-01	m6AclusterB	TCGA_Agilent1	>=60	180.3	DECEASED	Primary	Female
TCGA-02-0001-01	m6AclusterA	TCGA_Agilent1	<60	352.8	DECEASED	Primary	Female
TCGA-06-0197-01	m6AclusterB	TCGA_Agilent1	>=60	166.5	DECEASED	Primary	Female
TCGA-06-0237-01	m6AclusterA	TCGA_Agilent1	>=60	408.9	DECEASED	Primary	Female
TCGA-02-0058-01	m6AclusterA	TCGA_Agilent1	<60	250.2	DECEASED	Primary	Female
TCGA-06-0165-01	m6AclusterB	TCGA_Agilent1	<60	319.2	DECEASED	Primary	Male
TCGA-06-0137-01	m6AclusterB	TCGA_Agilent1	>=60	800.4	DECEASED	Primary	Female
TCGA-06-0159-01	m6AclusterB	TCGA_Agilent1	>=60	282.9	DECEASED	Primary	Male
TCGA-02-0055-01	m6AclusterB	TCGA_Agilent1	>=60	75	DECEASED	Primary	Female
TCGA-06-0206-01	m6AclusterB	TCGA_Agilent1	<60	229.5	DECEASED	Primary	Male
TCGA-06-0184-01	m6AclusterA	TCGA_Agilent1	>=60	2095.2	DECEASED	Primary	Male
TCGA-06-0209-01	m6AclusterB	TCGA_Agilent1	>=60	228.6	DECEASED	Primary	Male
TCGA-06-0187-01	m6AclusterA	TCGA_Agilent1	>=60	816	DECEASED	Primary	Male
TCGA-06-0221-01	m6AclusterB	TCGA_Agilent1	<60	594.3	DECEASED	Primary	Male
TCGA-02-0007-01	m6AclusterA	TCGA_Agilent1	<60	694.8	DECEASED	Primary	Female
TCGA-06-0156-01	m6AclusterB	TCGA_Agilent1	<60	175.5	DECEASED	Primary	Male
TCGA-06-0169-01	m6AclusterB	TCGA_Agilent1	>=60	98.7	DECEASED	Primary	Male
TCGA-06-0138-01	m6AclusterB	TCGA_Agilent1	<60	726.3	DECEASED	Primary	Male
TCGA-06-0139-01	m6AclusterB	TCGA_Agilent1	<60	356.7	DECEASED	Primary	Male
TCGA-02-0043-01	m6AclusterA	TCGA_Agilent1	<60	549	DECEASED	Primary	Female
TCGA-02-0028-01	m6AclusterA	TCGA_Agilent1	<60	2715.3	DECEASED	Primary	Male
TCGA-06-0185-01	m6AclusterA	TCGA_Agilent1	<60	2213.4	LIVING	Primary	Male
TCGA-02-0054-01	m6AclusterA	TCGA_Agilent1	<60	196.2	DECEASED	Primary	Female
TCGA-06-0214-01	m6AclusterA	TCGA_Agilent1	>=60	450.3	DECEASED	Primary	Male
TCGA-06-0151-01	m6AclusterB	TCGA_Agilent1	<60	1396.5	DECEASED	Primary	Female
TCGA-02-0003-01	m6AclusterA	TCGA_Agilent1	<60	141.9	DECEASED	Primary	Male
TCGA-06-0130-01	m6AclusterA	TCGA_Agilent1	<60	388.2	DECEASED	Primary	Male
TCGA-02-0024-01	m6AclusterA	TCGA_Agilent1	<60	1591.8	DECEASED	Primary	Male
TCGA-06-0166-01	m6AclusterA	TCGA_Agilent1	<60	175.5	DECEASED	Primary	Male
TCGA-06-0189-01	m6AclusterB	TCGA_Agilent1	<60	462.3	DECEASED	Primary	Male
TCGA-06-0168-01	m6AclusterB	TCGA_Agilent1	<60	589.5	DECEASED	Primary	Female
TCGA-02-0086-01	m6AclusterB	TCGA_Agilent1	<60	264	DECEASED	Primary	Female
TCGA-06-0240-01	m6AclusterB	TCGA_Agilent1	<60	612	DECEASED	Primary	Male
TCGA-02-0033-01	m6AclusterB	TCGA_Agilent1	<60	84.9	DECEASED	Primary	Male
TCGA-02-0075-01	m6AclusterA	TCGA_Agilent1	>=60	624.9	DECEASED	Primary	Male
TCGA-02-0034-01	m6AclusterB	TCGA_Agilent1	>=60	423.9	DECEASED	Primary	Male
TCGA-02-0037-01	m6AclusterA	TCGA_Agilent1	>=60	108.3	DECEASED	Primary	Female
TCGA-02-0085-01	m6AclusterB	TCGA_Agilent1	>=60	1538.4	DECEASED	Primary	Female
TCGA-02-0083-01	m6AclusterB	TCGA_Agilent1	<60	681	DECEASED	Primary	Female
TCGA-06-0140-01	m6AclusterA	TCGA_Agilent1	>=60	6	DECEASED	Primary	Male
TCGA-06-0176-01	m6AclusterA	TCGA_Agilent1	<60	2727.9	LIVING	Primary	Male
TCGA-02-0046-01	m6AclusterA	TCGA_Agilent1	>=60	206.1	DECEASED	Primary	Male
TCGA-06-0210-01	m6AclusterB	TCGA_Agilent1	>=60	221.7	DECEASED	Primary	Female
TCGA-06-0143-01	m6AclusterA	TCGA_Agilent1	<60	351.9	DECEASED	Primary	Male
TCGA-06-0241-01	m6AclusterA	TCGA_Agilent1	>=60	1459.5	DECEASED	Primary	Female
TCGA-06-0160-01	m6AclusterB	TCGA_Agilent1	<60	353.7	DECEASED	Primary	Female
TCGA-02-0071-01	m6AclusterA	TCGA_Agilent1	<60	164.7	DECEASED	Primary	Male
TCGA-02-0047-01	m6AclusterA	TCGA_Agilent1	>=60	441.6	DECEASED	Primary	Male
TCGA-06-0129-01	m6AclusterA	TCGA_Agilent1	<60	1009.2	DECEASED	Primary	Male
TCGA-02-0113-01	m6AclusterB	TCGA_Agilent1	<60	2777.4	LIVING	Primary	Female
TCGA-02-0080-01	m6AclusterB	TCGA_Agilent1	<60	2689.5	DECEASED	Primary	Male
TCGA-02-0102-01	m6AclusterA	TCGA_Agilent1	<60	810	DECEASED	Primary	Male
TCGA-06-0147-01	m6AclusterB	TCGA_Agilent1	<60	533.1	DECEASED	Primary	Female
TCGA-02-0074-01	m6AclusterA	TCGA_Agilent1	>=60	305.4	DECEASED	Primary	Female
TCGA-06-0148-01	m6AclusterA	TCGA_Agilent1	>=60	302.7	DECEASED	Primary	Male
TCGA-06-0213-01	m6AclusterB	TCGA_Agilent1	<60	15.9	DECEASED	Primary	Female
TCGA-02-0027-01	m6AclusterA	TCGA_Agilent1	<60	364.8	DECEASED	Primary	Female
TCGA-06-0133-01	m6AclusterB	TCGA_Agilent1	>=60	428.7	DECEASED	Primary	Male
TCGA-02-0009-01	m6AclusterA	TCGA_Agilent1	>=60	317.4	DECEASED	Primary	Female
TCGA-06-2567-01	m6AclusterA	TCGA_Agilent2	>=60	131.1	DECEASED	Primary	Male
TCGA-12-0703-01	m6AclusterB	TCGA_Agilent2	<60	611.1	DECEASED	Primary	Male
TCGA-14-1821-01	m6AclusterA	TCGA_Agilent2	<60	533.1	DECEASED	Primary	Male
TCGA-08-0373-01	m6AclusterB	TCGA_Agilent2	>=60	132	DECEASED	Primary	Male
TCGA-26-1438-01	m6AclusterB	TCGA_Agilent2	<60	300.6	LIVING	Primary	Male
TCGA-14-1402-01	m6AclusterB	TCGA_Agilent2	<60	960.9	DECEASED	Primary	Female
TCGA-16-1045-01	m6AclusterB	TCGA_Agilent2	<60	870.3	DECEASED	Primary	Female
TCGA-19-1388-01	m6AclusterA	TCGA_Agilent2	<60	388.2	DECEASED	Primary	Male
TCGA-19-0963-01	m6AclusterA	TCGA_Agilent2	>=60	427.8	DECEASED	Primary	Male
TCGA-14-0736-01	m6AclusterB	TCGA_Agilent2	<60	453.3	DECEASED	Primary	Male
TCGA-19-1387-01	m6AclusterA	TCGA_Agilent2	>=60	178.5	LIVING	Primary	Male
TCGA-14-1452-01	m6AclusterA	TCGA_Agilent2	>=60	213	DECEASED	Primary	Male
TCGA-14-1823-01	m6AclusterB	TCGA_Agilent2	<60	535.2	DECEASED	Primary	Female
TCGA-06-0749-01	m6AclusterB	TCGA_Agilent2	<60	80.7	DECEASED	Primary	Male
TCGA-06-1086-01	m6AclusterA	TCGA_Agilent2	<60	204.9	DECEASED	Primary	Male
TCGA-12-0618-01	m6AclusterA	TCGA_Agilent2	<60	389.4	DECEASED	Primary	Male
TCGA-08-0525-01	m6AclusterA	TCGA_Agilent2	<60	479.1	DECEASED	Primary	Male
TCGA-12-1598-01	m6AclusterB	TCGA_Agilent2	>=60	469.2	DECEASED	Primary	Female
TCGA-12-0692-01	m6AclusterA	TCGA_Agilent2	>=60	109.5	DECEASED	Primary	Female
TCGA-02-0422-01	m6AclusterA	TCGA_Agilent2	<60	434.7	DECEASED	Primary	Male
TCGA-06-2564-01	m6AclusterA	TCGA_Agilent2	<60	178.5	LIVING	Primary	Male
TCGA-02-0004-01	m6AclusterB	TCGA_Agilent2	<60	339.9	DECEASED	Primary	Male
TCGA-08-0392-01	m6AclusterB	TCGA_Agilent2	>=60	21.6	DECEASED	Primary	Male
TCGA-06-0179-01	m6AclusterB	TCGA_Agilent2	>=60	607.2	DECEASED	Primary	Male
TCGA-06-1801-01	m6AclusterA	TCGA_Agilent2	<60	354.9	DECEASED	Primary	Female
TCGA-14-0871-01	m6AclusterA	TCGA_Agilent2	>=60	867.3	DECEASED	Primary	Female
TCGA-12-3649-01	m6AclusterB	TCGA_Agilent2	>=60	456.3	DECEASED	Primary	Male
TCGA-28-1749-01	m6AclusterA	TCGA_Agilent2	>=60	276	LIVING	Primary	Male
TCGA-08-0358-01	m6AclusterB	TCGA_Agilent2	<60	668.1	DECEASED	Primary	Male
TCGA-28-1746-01	m6AclusterA	TCGA_Agilent2	>=60	6	LIVING	Primary	Female
TCGA-14-0787-01	m6AclusterA	TCGA_Agilent2	>=60	66.9	DECEASED	Primary	Male
TCGA-28-1757-01	m6AclusterA	TCGA_Agilent2	>=60	3.9	LIVING	Primary	Male
TCGA-06-0162-01	m6AclusterB	TCGA_Agilent2	<60	102.6	DECEASED	Primary	Female
TCGA-12-1092-01	m6AclusterB	TCGA_Agilent2	<60	651.3	DECEASED	Primary	Male
TCGA-12-1094-01	m6AclusterB	TCGA_Agilent2	<60	366.6	DECEASED	Primary	Male
TCGA-28-1747-01	m6AclusterA	TCGA_Agilent2	<60	75.9	DECEASED	Primary	Male
TCGA-08-0345-01	m6AclusterA	TCGA_Agilent2	>=60	52.2	DECEASED	Primary	Female
TCGA-02-0260-01	m6AclusterB	TCGA_Agilent2	<60	507.6	DECEASED	Primary	Male
TCGA-27-2519-01	m6AclusterB	TCGA_Agilent2	<60	542.1	DECEASED	Primary	Male
TCGA-06-0412-01	m6AclusterA	TCGA_Agilent2	<60	286.8	DECEASED	Primary	Female
TCGA-27-1835-01	m6AclusterA	TCGA_Agilent2	<60	638.7	DECEASED	Primary	Female
TCGA-02-0440-01	m6AclusterA	TCGA_Agilent2	>=60	339.9	DECEASED	Primary	Male
TCGA-27-2521-01	m6AclusterB	TCGA_Agilent2	<60	502.5	DECEASED	Primary	Male
TCGA-12-1599-01	m6AclusterB	TCGA_Agilent2	<60	769.8	DECEASED	Primary	Female
TCGA-06-1087-01	m6AclusterA	TCGA_Agilent2	>=60	121.2	DECEASED	Primary	Male
TCGA-06-0397-01	m6AclusterA	TCGA_Agilent2	<60	270	DECEASED	Primary	Female
TCGA-08-0356-01	m6AclusterB	TCGA_Agilent2	<60	932.4	DECEASED	Primary	Female
TCGA-06-0152-01	m6AclusterB	TCGA_Agilent2	>=60	369.6	DECEASED	Primary	Male
TCGA-06-0645-01	m6AclusterB	TCGA_Agilent2	<60	172.5	DECEASED	Primary	Female
TCGA-19-2624-01	m6AclusterA	TCGA_Agilent2	<60	4.8	DECEASED	Primary	Male
TCGA-19-0957-01	m6AclusterA	TCGA_Agilent2	<60	656.4	DECEASED	Primary	Female
TCGA-12-0776-01	m6AclusterB	TCGA_Agilent2	<60	291.6	DECEASED	Primary	Male
TCGA-15-1449-01	m6AclusterA	TCGA_Agilent2	>=60	398.1	DECEASED	Primary	Male
TCGA-28-1751-01	m6AclusterA	TCGA_Agilent2	>=60	228.6	LIVING	Primary	Female
TCGA-12-3651-01	m6AclusterB	TCGA_Agilent2	>=60	380.4	DECEASED	Primary	Male
TCGA-12-3650-01	m6AclusterA	TCGA_Agilent2	<60	328.2	DECEASED	Primary	Male
TCGA-19-0955-01	m6AclusterB	TCGA_Agilent2	>=60	352.8	LIVING	Primary	Male
TCGA-06-0409-01	m6AclusterA	TCGA_Agilent2	<60	2169.3	DECEASED	Primary	Male
TCGA-19-1787-01	m6AclusterA	TCGA_Agilent2	<60	379.5	DECEASED	Primary	Male
TCGA-15-1446-01	m6AclusterA	TCGA_Agilent2	<60	572.7	LIVING	Primary	Male
TCGA-14-1453-01	m6AclusterB	TCGA_Agilent2	>=60	34.5	DECEASED	Primary	Male
TCGA-19-2620-01	m6AclusterA	TCGA_Agilent2	>=60	145.8	DECEASED	Primary	Male
TCGA-06-0649-01	m6AclusterB	TCGA_Agilent2	>=60	63	DECEASED	Primary	Female
TCGA-12-1597-01	m6AclusterB	TCGA_Agilent2	>=60	665.1	DECEASED	Primary	Female
TCGA-02-0337-01	m6AclusterB	TCGA_Agilent2	<60	753	DECEASED	Primary	Male
TCGA-02-0285-01	m6AclusterB	TCGA_Agilent2	<60	415.8	DECEASED	Primary	Female
TCGA-27-2527-01	m6AclusterB	TCGA_Agilent2	>=60	431.7	DECEASED	Primary	Male
TCGA-02-0332-01	m6AclusterB	TCGA_Agilent2	<60	770.7	DECEASED	Primary	Female
TCGA-14-0865-01	m6AclusterA	TCGA_Agilent2	>=60	494.7	DECEASED	Primary	Male
TCGA-12-1088-01	m6AclusterB	TCGA_Agilent2	<60	3825	DECEASED	Primary	Female
TCGA-12-3646-01	m6AclusterA	TCGA_Agilent2	<60	1319.7	DECEASED	Primary	Female
TCGA-27-1836-01	m6AclusterB	TCGA_Agilent2	<60	900.9	DECEASED	Primary	Female
TCGA-08-0524-01	m6AclusterA	TCGA_Agilent2	<60	217.8	DECEASED	Primary	Female
TCGA-08-0244-01	m6AclusterB	TCGA_Agilent2	>=60	680.1	DECEASED	Primary	Male
TCGA-12-0691-01	m6AclusterA	TCGA_Agilent2	>=60	363.6	DECEASED	Primary	Male
TCGA-14-0790-01	m6AclusterA	TCGA_Agilent2	>=60	412.8	DECEASED	Primary	Female
TCGA-32-2616-01	m6AclusterA	TCGA_Agilent2	<60	220.8	DECEASED	Primary	Female
TCGA-41-2573-01	m6AclusterA	TCGA_Agilent2	<60	268.2	LIVING	Primary	Male
TCGA-14-3477-01	m6AclusterA	TCGA_Agilent2	<60	113.4	LIVING	Primary	Female
TCGA-12-1095-01	m6AclusterA	TCGA_Agilent2	>=60	474.9	DECEASED	Primary	Female
TCGA-08-0517-01	m6AclusterA	TCGA_Agilent2	<60	1759.2	DECEASED	Primary	Female
TCGA-19-2621-01	m6AclusterA	TCGA_Agilent2	>=60	32.4	DECEASED	Primary	Male
TCGA-14-0812-01	m6AclusterB	TCGA_Agilent2	>=60	97.5	DECEASED	Primary	Male
TCGA-14-1458-01	m6AclusterA	TCGA_Agilent2	<60	200.1	DECEASED	Primary	Male
TCGA-08-0360-01	m6AclusterB	TCGA_Agilent2	>=60	461.1	DECEASED	Primary	Male
TCGA-02-0451-01	m6AclusterA	TCGA_Agilent2	>=60	486	DECEASED	Primary	Female
TCGA-02-2470-01	m6AclusterB	TCGA_Agilent2	<60	387.3	DECEASED	Primary	Male
TCGA-02-0317-01	m6AclusterB	TCGA_Agilent2	<60	366.6	DECEASED	Primary	Male
TCGA-08-0510-01	m6AclusterB	TCGA_Agilent2	>=60	128.1	DECEASED	Primary	Male
TCGA-02-0048-01	m6AclusterA	TCGA_Agilent2	>=60	96.6	DECEASED	Primary	Male
TCGA-14-0817-01	m6AclusterB	TCGA_Agilent2	>=60	161.7	DECEASED	Primary	Female
TCGA-19-2619-01	m6AclusterA	TCGA_Agilent2	<60	289.8	LIVING	Primary	Female
TCGA-28-1753-01	m6AclusterA	TCGA_Agilent2	<60	36.6	LIVING	Primary	Male
TCGA-08-0349-01	m6AclusterB	TCGA_Agilent2	<60	293.7	DECEASED	Primary	Male
TCGA-06-0402-01	m6AclusterA	TCGA_Agilent2	>=60	7.8	DECEASED	Primary	Male
TCGA-32-1982-01	m6AclusterB	TCGA_Agilent2	>=60	139.8	DECEASED	Primary	Female
TCGA-12-0615-01	m6AclusterB	TCGA_Agilent2	>=60	460.2	DECEASED	Primary	Female
TCGA-06-0875-01	m6AclusterA	TCGA_Agilent2	>=60	1302.9	LIVING	Primary	Female
TCGA-12-0656-01	m6AclusterB	TCGA_Agilent2	<60	2841.3	DECEASED	Primary	Female
TCGA-08-0516-01	m6AclusterA	TCGA_Agilent2	<60	587.4	DECEASED	Primary	Male
TCGA-08-0390-01	m6AclusterB	TCGA_Agilent2	>=60	418.8	DECEASED	Primary	Male
TCGA-14-1454-01	m6AclusterA	TCGA_Agilent2	<60	904.8	DECEASED	Primary	Female
TCGA-12-0820-01	m6AclusterA	TCGA_Agilent2	<60	553.8	DECEASED	Primary	Male
TCGA-02-0111-01	m6AclusterB	TCGA_Agilent2	<60	694.8	DECEASED	Primary	Male
TCGA-06-0745-01	m6AclusterB	TCGA_Agilent2	<60	235.5	DECEASED	Primary	Male
TCGA-02-0333-01	m6AclusterB	TCGA_Agilent2	>=60	131.1	DECEASED	Primary	Female
TCGA-14-1827-01	m6AclusterB	TCGA_Agilent2	<60	176.4	DECEASED	Primary	Male
TCGA-06-2570-01	m6AclusterA	TCGA_Agilent2	<60	944.1	LIVING	Primary	Female
TCGA-14-1825-01	m6AclusterA	TCGA_Agilent2	>=60	228.6	DECEASED	Primary	Male
TCGA-12-0616-01	m6AclusterB	TCGA_Agilent2	<60	441.6	DECEASED	Primary	Female
TCGA-02-0432-01	m6AclusterB	TCGA_Agilent2	<60	1412.4	DECEASED	Primary	Male
TCGA-02-0290-01	m6AclusterB	TCGA_Agilent2	<60	477.9	DECEASED	Primary	Male
TCGA-15-1447-01	m6AclusterA	TCGA_Agilent2	<60	1594.5	LIVING	Primary	Female
TCGA-12-0818-01	m6AclusterB	TCGA_Agilent2	<60	2750.7	DECEASED	Primary	Female
TCGA-27-1832-01	m6AclusterB	TCGA_Agilent2	<60	295.8	DECEASED	Primary	Female
TCGA-12-0775-01	m6AclusterB	TCGA_Agilent2	>=60	228.6	DECEASED	Primary	Female
TCGA-08-0380-01	m6AclusterB	TCGA_Agilent2	>=60	447.3	DECEASED	Primary	Female
TCGA-06-0876-01	m6AclusterB	TCGA_Agilent2	>=60	1384.8	LIVING	Primary	Female
TCGA-19-1385-01	m6AclusterA	TCGA_Agilent2	>=60	322.2	DECEASED	Primary	Male
TCGA-02-0023-01	m6AclusterB	TCGA_Agilent2	<60	603.3	DECEASED	Primary	Female
TCGA-06-0182-01	m6AclusterB	TCGA_Agilent2	>=60	109.5	DECEASED	Primary	Male
TCGA-19-1788-01	m6AclusterA	TCGA_Agilent2	<60	110.4	DECEASED	Primary	Male
TCGA-06-0750-01	m6AclusterB	TCGA_Agilent2	<60	27.6	DECEASED	Primary	Male
TCGA-28-2506-01	m6AclusterB	TCGA_Agilent2	>=60	201.9	LIVING	Primary	Female
TCGA-12-0828-01	m6AclusterB	TCGA_Agilent2	<60	268.2	DECEASED	Primary	Male
TCGA-06-0747-01	m6AclusterA	TCGA_Agilent2	<60	80.7	DECEASED	Primary	Male
TCGA-02-0456-01	m6AclusterA	TCGA_Agilent2	>=60	100.5	DECEASED	Primary	Female
TCGA-12-0821-01	m6AclusterA	TCGA_Agilent2	>=60	318.3	DECEASED	Primary	Male
TCGA-08-0347-01	m6AclusterB	TCGA_Agilent2	<60	770.7	DECEASED	Primary	Male
TCGA-16-1055-01	m6AclusterB	TCGA_Agilent2	<60	308.4	DECEASED	Primary	Male
TCGA-02-0015-01	m6AclusterA	TCGA_Agilent2	<60	618	DECEASED	Primary	Male
TCGA-08-0359-01	m6AclusterB	TCGA_Agilent2	<60	101.4	DECEASED	Primary	Female
TCGA-02-2486-01	m6AclusterB	TCGA_Agilent2	>=60	609	DECEASED	Primary	Male
TCGA-12-0819-01	m6AclusterB	TCGA_Agilent2	<60	743.1	DECEASED	Primary	Female
TCGA-06-1802-01	m6AclusterB	TCGA_Agilent2	>=60	459.3	DECEASED	Primary	Male
TCGA-16-1063-01	m6AclusterA	TCGA_Agilent2	>=60	418.8	DECEASED	Primary	Male
TCGA-27-1830-01	m6AclusterA	TCGA_Agilent2	<60	151.8	DECEASED	Primary	Male
TCGA-08-0512-01	m6AclusterB	TCGA_Agilent2	<60	1263.6	DECEASED	Primary	Male
TCGA-06-0413-01	m6AclusterA	TCGA_Agilent2	>=60	94.5	DECEASED	Primary	Female
TCGA-06-0744-01	m6AclusterB	TCGA_Agilent2	>=60	1405.5	DECEASED	Primary	Male
TCGA-14-2555-01	m6AclusterB	TCGA_Agilent2	<60	238.5	LIVING	Primary	Female
TCGA-19-0960-01	m6AclusterA	TCGA_Agilent2	>=60	258.3	LIVING	Primary	Female
TCGA-06-2559-01	m6AclusterB	TCGA_Agilent2	>=60	147.9	DECEASED	Primary	Male
TCGA-08-0350-01	m6AclusterB	TCGA_Agilent2	<60	876	DECEASED	Primary	Male
TCGA-02-0325-01	m6AclusterA	TCGA_Agilent2	>=60	318.3	DECEASED	Primary	Male
TCGA-19-2625-01	m6AclusterB	TCGA_Agilent2	>=60	122.1	DECEASED	Primary	Female
TCGA-02-0266-01	m6AclusterB	TCGA_Agilent2	<60	531.3	DECEASED	Primary	Male
TCGA-27-1837-01	m6AclusterB	TCGA_Agilent2	<60	420.9	DECEASED	Primary	Male
TCGA-12-0827-01	m6AclusterB	TCGA_Agilent2	<60	1161.9	DECEASED	Primary	Female
TCGA-12-1097-01	m6AclusterB	TCGA_Agilent2	>=60	435.6	DECEASED	Primary	Male
TCGA-02-0070-01	m6AclusterB	TCGA_Agilent2	>=60	750.9	LIVING	Primary	Male
TCGA-06-2569-01	m6AclusterA	TCGA_Agilent2	<60	12.9	LIVING	Primary	Female
TCGA-28-1760-01	m6AclusterB	TCGA_Agilent2	<60	141	LIVING	Primary	Male
TCGA-06-1800-01	m6AclusterA	TCGA_Agilent2	>=60	803.1	DECEASED	Primary	Male
TCGA-12-1093-01	m6AclusterB	TCGA_Agilent2	>=60	479.1	DECEASED	Primary	Female
TCGA-12-1091-01	m6AclusterA	TCGA_Agilent2	<60	995.4	DECEASED	Primary	Female
TCGA-28-1752-01	m6AclusterB	TCGA_Agilent2	<60	254.4	LIVING	Primary	Female
TCGA-16-1060-01	m6AclusterB	TCGA_Agilent2	>=60	273.9	DECEASED	Primary	Female
TCGA-14-0786-01	m6AclusterA	TCGA_Agilent2	<60	690.9	DECEASED	Primary	Female
TCGA-27-2528-01	m6AclusterB	TCGA_Agilent2	>=60	473.1	DECEASED	Primary	Male
TCGA-27-1834-01	m6AclusterA	TCGA_Agilent2	<60	1215.3	DECEASED	Primary	Male
TCGA-06-2565-01	m6AclusterA	TCGA_Agilent2	<60	498.6	DECEASED	Primary	Male
TCGA-12-1090-01	m6AclusterB	TCGA_Agilent2	<60	227.7	DECEASED	Primary	Male
TCGA-02-0068-01	m6AclusterB	TCGA_Agilent2	<60	792.3	DECEASED	Primary	Male
TCGA-32-2638-01	m6AclusterA	TCGA_Agilent2	>=60	754.8	DECEASED	Primary	Male
TCGA-27-1838-01	m6AclusterB	TCGA_Agilent2	<60	345	DECEASED	Primary	Female
TCGA-02-0324-01	m6AclusterB	TCGA_Agilent2	>=60	231.6	DECEASED	Primary	Female
TCGA-14-1795-01	m6AclusterA	TCGA_Agilent2	>=60	59.1	DECEASED	Primary	Male
TCGA-02-0016-01	m6AclusterA	TCGA_Agilent2	<60	2609.7	DECEASED	Primary	Male
TCGA-28-1755-01	m6AclusterA	TCGA_Agilent2	<60	46.2	DECEASED	Primary	Female
TCGA-27-2524-01	m6AclusterB	TCGA_Agilent2	<60	227.7	DECEASED	Primary	Male
TCGA-02-0446-01	m6AclusterA	TCGA_Agilent2	>=60	277.8	DECEASED	Primary	Male
TCGA-02-0087-01	m6AclusterA	TCGA_Agilent2	<60	1731.6	LIVING	Primary	Female
TCGA-14-1401-01	m6AclusterA	TCGA_Agilent2	<60	112.5	DECEASED	Primary	Male
TCGA-12-3648-01	m6AclusterA	TCGA_Agilent2	>=60	807.3	DECEASED	Primary	Female
TCGA-08-0357-01	m6AclusterB	TCGA_Agilent2	<60	1126.5	DECEASED	Primary	Male
TCGA-12-3653-01	m6AclusterA	TCGA_Agilent2	<60	435.6	DECEASED	Primary	Female
TCGA-14-0867-01	m6AclusterA	TCGA_Agilent2	>=60	61.2	DECEASED	Primary	Male
TCGA-06-2561-01	m6AclusterA	TCGA_Agilent2	<60	529.2	DECEASED	Primary	Female
TCGA-08-0348-01	m6AclusterB	TCGA_Agilent2	>=60	364.8	DECEASED	Primary	Male
TCGA-02-0106-01	m6AclusterA	TCGA_Agilent2	<60	349.8	DECEASED	Primary	Male
TCGA-12-0822-01	m6AclusterB	TCGA_Agilent2	<60	704.7	DECEASED	Primary	Male
TCGA-14-1456-01	m6AclusterB	TCGA_Agilent2	<60	1227.9	LIVING	Primary	Male
TCGA-12-0662-01	m6AclusterB	TCGA_Agilent2	<60	1144.2	DECEASED	Primary	Male
TCGA-14-1451-01	m6AclusterB	TCGA_Agilent2	<60	692.7	DECEASED	Primary	Male
TCGA-06-0644-01	m6AclusterB	TCGA_Agilent2	>=60	378.3	DECEASED	Primary	Male
TCGA-02-0258-01	m6AclusterB	TCGA_Agilent2	<60	495.6	DECEASED	Primary	Female
TCGA-06-0192-01	m6AclusterB	TCGA_Agilent2	<60	1167.9	DECEASED	Primary	Male
TCGA-12-1089-01	m6AclusterB	TCGA_Agilent2	>=60	174.3	DECEASED	Primary	Male
TCGA-27-1833-01	m6AclusterB	TCGA_Agilent2	>=60	726.3	DECEASED	Primary	Female
TCGA-12-0772-01	m6AclusterB	TCGA_Agilent2	<60	1614.3	DECEASED	Primary	Male
TCGA-08-0514-01	m6AclusterA	TCGA_Agilent2	>=60	332.1	DECEASED	Primary	Female
TCGA-06-0879-01	m6AclusterB	TCGA_Agilent2	<60	1211.1	DECEASED	Primary	Male
TCGA-12-1602-01	m6AclusterB	TCGA_Agilent2	<60	203.1	DECEASED	Primary	Male
TCGA-08-0389-01	m6AclusterA	TCGA_Agilent2	<60	460.2	DECEASED	Primary	Male
TCGA-06-1084-01	m6AclusterB	TCGA_Agilent2	<60	717.6	DECEASED	Primary	Male
TCGA-06-2558-01	m6AclusterB	TCGA_Agilent2	>=60	374.4	DECEASED	Primary	Female
TCGA-02-0039-01	m6AclusterB	TCGA_Agilent2	<60	315.3	DECEASED	Primary	Male
TCGA-19-1789-01	m6AclusterA	TCGA_Agilent2	>=60	97.5	DECEASED	Primary	Female
TCGA-32-2632-01	m6AclusterB	TCGA_Agilent2	>=60	265.2	DECEASED	Primary	Male
TCGA-02-0104-01	m6AclusterB	TCGA_Agilent2	<60	1948.5	DECEASED	Primary	Female
TCGA-26-1799-01	m6AclusterA	TCGA_Agilent2	>=60	280.8	DECEASED	Primary	Male
TCGA-02-0026-01	m6AclusterA	TCGA_Agilent2	<60	737.1	DECEASED	Primary	Male
TCGA-32-2615-01	m6AclusterB	TCGA_Agilent2	>=60	477.9	DECEASED	Primary	Male
TCGA-28-2514-01	m6AclusterA	TCGA_Agilent2	<60	157.8	LIVING	Primary	Male
TCGA-06-0686-01	m6AclusterA	TCGA_Agilent2	<60	425.7	DECEASED	Primary	Male
TCGA-12-0688-01	m6AclusterB	TCGA_Agilent2	>=60	799.2	DECEASED	Primary	Male
TCGA-02-0084-01	m6AclusterB	TCGA_Agilent2	<60	378.3	DECEASED	Primary	Female
TCGA-08-0520-01	m6AclusterB	TCGA_Agilent2	>=60	322.2	DECEASED	Primary	Male
TCGA-12-0773-01	m6AclusterB	TCGA_Agilent2	<60	1296	DECEASED	Primary	Male
TCGA-02-0338-01	m6AclusterA	TCGA_Agilent2	<60	317.4	DECEASED	Primary	Male
TCGA-02-2483-01	m6AclusterB	TCGA_Agilent2	<60	459.3	LIVING	Primary	Male
TCGA-27-2523-01	m6AclusterA	TCGA_Agilent2	>=60	481.8	DECEASED	Primary	Male
TCGA-06-0155-01	m6AclusterA	TCGA_Agilent2	>=60	313.5	DECEASED	Primary	Male
TCGA-12-0769-01	m6AclusterA	TCGA_Agilent2	<60	451.5	DECEASED	Primary	Male
TCGA-32-1976-01	m6AclusterA	TCGA_Agilent2	>=60	14.7	DECEASED	Primary	Male
TCGA-19-1786-01	m6AclusterA	TCGA_Agilent2	>=60	214.8	LIVING	Primary	Female
TCGA-02-0271-01	m6AclusterA	TCGA_Agilent2	<60	433.5	DECEASED	Primary	Male
TCGA-06-0881-01	m6AclusterB	TCGA_Agilent2	<60	496.8	DECEASED	Primary	Male
TCGA-06-0194-01	m6AclusterB	TCGA_Agilent2	<60	139.8	DECEASED	Primary	Female
TCGA-02-0330-01	m6AclusterB	TCGA_Agilent2	<60	477	DECEASED	Primary	Female
TCGA-12-0670-01	m6AclusterB	TCGA_Agilent2	>=60	778.5	DECEASED	Primary	Male
TCGA-06-0146-01	m6AclusterB	TCGA_Agilent2	<60	602.1	DECEASED	Primary	Female
TCGA-14-1459-01	m6AclusterB	TCGA_Agilent2	>=60	372.6	DECEASED	Primary	Female
TCGA-06-0743-01	m6AclusterB	TCGA_Agilent2	>=60	791.4	DECEASED	Primary	Male
TCGA-12-0619-01	m6AclusterB	TCGA_Agilent2	>=60	1046.7	DECEASED	Primary	Male
TCGA-28-2513-01	m6AclusterB	TCGA_Agilent2	>=60	218.7	LIVING	Primary	Female
TCGA-27-1831-01	m6AclusterB	TCGA_Agilent2	>=60	497.7	DECEASED	Primary	Male
TCGA-14-2554-01	m6AclusterB	TCGA_Agilent2	<60	524.4	DECEASED	Primary	Female
TCGA-12-0780-01	m6AclusterA	TCGA_Agilent2	<60	445.5	DECEASED	Primary	Female
TCGA-06-0878-01	m6AclusterA	TCGA_Agilent2	>=60	214.8	LIVING	Primary	Male
TCGA-08-0352-01	m6AclusterB	TCGA_Agilent2	>=60	38.4	DECEASED	Primary	Male
TCGA-12-1099-01	m6AclusterB	TCGA_Agilent2	>=60	124.2	DECEASED	Primary	Female
TCGA-06-0648-01	m6AclusterA	TCGA_Agilent2	>=60	293.7	DECEASED	Primary	Male
TCGA-02-0289-01	m6AclusterA	TCGA_Agilent2	<60	425.7	DECEASED	Primary	Male
TCGA-19-1791-01	m6AclusterA	TCGA_Agilent2	>=60	3.9	LIVING	Primary	Female
TCGA-14-1037-01	m6AclusterA	TCGA_Agilent2	>=60	578.4	DECEASED	Primary	Female
TCGA-14-0866-01	m6AclusterB	TCGA_Agilent2	<60	789.3	DECEASED	Primary	Male
TCGA-08-0518-01	m6AclusterA	TCGA_Agilent2	>=60	579.6	DECEASED	Primary	Female
TCGA-14-1396-01	m6AclusterB	TCGA_Agilent2	>=60	33.6	DECEASED	Primary	Female
TCGA-06-0177-01	m6AclusterB	TCGA_Agilent2	>=60	125.1	DECEASED	Primary	Male
TCGA-06-2557-01	m6AclusterA	TCGA_Agilent2	>=60	32.4	DECEASED	Primary	Male
TCGA-02-0269-01	m6AclusterA	TCGA_Agilent2	>=60	322.2	DECEASED	Primary	Male
TCGA-08-0344-01	m6AclusterA	TCGA_Agilent2	>=60	3473.1	DECEASED	Primary	Male
TCGA-27-2526-01	m6AclusterB	TCGA_Agilent2	>=60	85.8	DECEASED	Primary	Female
TCGA-08-0351-01	m6AclusterB	TCGA_Agilent2	<60	1958.4	DECEASED	Primary	Male
TCGA-02-0430-01	m6AclusterA	TCGA_Agilent2	>=60	316.5	DECEASED	Primary	Female
TCGA-12-1096-01	m6AclusterB	TCGA_Agilent2	<60	273	DECEASED	Primary	Male
TCGA-14-1794-01	m6AclusterB	TCGA_Agilent2	<60	29.7	DECEASED	Primary	Male
TCGA-06-0646-01	m6AclusterB	TCGA_Agilent2	>=60	172.5	DECEASED	Primary	Male
TCGA-19-2629-01	m6AclusterA	TCGA_Agilent2	>=60	726.3	DECEASED	Primary	Male
TCGA-28-2509-01	m6AclusterB	TCGA_Agilent2	>=60	142.8	LIVING	Primary	Female
TCGA-02-2466-01	m6AclusterA	TCGA_Agilent2	>=60	503.7	DECEASED	Primary	Male
TCGA-12-0654-01	m6AclusterB	TCGA_Agilent2	<60	227.7	DECEASED	Primary	Female
TCGA-12-1600-01	m6AclusterA	TCGA_Agilent2	>=60	441.6	DECEASED	Primary	Male
TCGA-02-0321-01	m6AclusterB	TCGA_Agilent2	>=60	296.7	DECEASED	Primary	Male
TCGA-14-1455-01	m6AclusterA	TCGA_Agilent2	>=60	27.6	DECEASED	Primary	Male
TCGA-16-0849-01	m6AclusterB	TCGA_Agilent2	<60	781.5	LIVING	Primary	Male
TCGA-32-1986-01	m6AclusterB	TCGA_Agilent2	>=60	380.4	DECEASED	Primary	Male
TCGA-12-0657-01	m6AclusterA	TCGA_Agilent2	>=60	3	DECEASED	Primary	Male
TCGA-28-1756-01	m6AclusterB	TCGA_Agilent2	>=60	84.9	LIVING	Primary	Male
TCGA-16-1460-01	m6AclusterA	TCGA_Agilent2	<60	192.3	LIVING	Primary	Female
TCGA-08-0353-01	m6AclusterA	TCGA_Agilent2	<60	252.3	DECEASED	Primary	Male
TCGA-14-1034-01	m6AclusterA	TCGA_Agilent2	>=60	477.9	DECEASED	Primary	Female
TCGA-14-0789-01	m6AclusterB	TCGA_Agilent2	<60	337.2	DECEASED	Primary	Male
TCGA-27-2518-01	m6AclusterB	TCGA_Agilent2	<60	742.2	DECEASED	Primary	Male
TCGA-02-0059-01	m6AclusterB	TCGA_Agilent2	>=60	286.8	DECEASED	Primary	Female
TCGA-06-0414-01	m6AclusterA	TCGA_Agilent2	>=60	1052.7	DECEASED	Primary	Male
TCGA-14-0783-01	m6AclusterB	TCGA_Agilent2	<60	186.3	DECEASED	Primary	Female
TCGA-02-2485-01	m6AclusterA	TCGA_Agilent2	<60	463.2	LIVING	Primary	Male
TCGA-14-1829-01	m6AclusterB	TCGA_Agilent2	<60	214.8	LIVING	Primary	Male
TCGA-08-0355-01	m6AclusterB	TCGA_Agilent2	<60	736.2	DECEASED	Primary	Female
TCGA-14-0813-01	m6AclusterB	TCGA_Agilent2	>=60	40.5	DECEASED	Primary	Male
TCGA-06-0127-01	m6AclusterB	TCGA_Agilent2	>=60	119.4	DECEASED	Primary	Male
TCGA-15-0742-01	m6AclusterA	TCGA_Agilent2	>=60	412.8	DECEASED	Primary	Male
TCGA-12-0707-01	m6AclusterB	TCGA_Agilent2	<60	851.4	DECEASED	Primary	Male
TCGA-06-0216-01	m6AclusterB	TCGA_Agilent2	>=60	724.5	DECEASED	Primary	Female
TCGA-08-0509-01	m6AclusterB	TCGA_Agilent2	>=60	376.5	DECEASED	Primary	Male
TCGA-08-0529-01	m6AclusterA	TCGA_Agilent2	<60	552	DECEASED	Primary	Female
TCGA-12-0826-01	m6AclusterB	TCGA_Agilent2	<60	832.8	DECEASED	Primary	Female
TCGA-02-0326-01	m6AclusterB	TCGA_Agilent2	>=60	219.9	DECEASED	Primary	Female
TCGA-02-0051-01	m6AclusterB	TCGA_Agilent2	<60	452.4	DECEASED	Primary	Male
TCGA-19-0962-01	m6AclusterB	TCGA_Agilent2	>=60	19.8	DECEASED	Primary	Female
TCGA-19-0964-01	m6AclusterA	TCGA_Agilent2	>=60	101.4	LIVING	Primary	Male
TCGA-16-1056-01	m6AclusterA	TCGA_Agilent2	<60	419.7	DECEASED	Primary	Male
TCGA-19-2623-01	m6AclusterB	TCGA_Agilent2	>=60	225.6	LIVING	Primary	Male
TCGA-41-2571-01	m6AclusterB	TCGA_Agilent2	>=60	25.5	DECEASED	Primary	Male
TCGA-02-0281-01	m6AclusterA	TCGA_Agilent2	>=60	119.4	DECEASED	Primary	Female
TCGA-19-1386-01	m6AclusterA	TCGA_Agilent2	<60	272.1	DECEASED	Primary	Male
TCGA-08-0245-01	m6AclusterA	TCGA_Agilent2	<60	1134.3	DECEASED	Primary	Female
TCGA-08-0521-01	m6AclusterA	TCGA_Agilent2	<60	144	DECEASED	Primary	Male
TCGA-08-0531-01	m6AclusterB	TCGA_Agilent2	>=60	226.8	DECEASED	Primary	Male
TCGA-06-0164-01	m6AclusterB	TCGA_Agilent2	<60	1706.1	DECEASED	Primary	Male
TCGA-06-0238-01	m6AclusterB	TCGA_Agilent2	<60	399	DECEASED	Primary	Male
TCGA-08-0346-01	m6AclusterB	TCGA_Agilent2	>=60	252.3	DECEASED	Primary	Male
TCGA-28-1750-01	m6AclusterA	TCGA_Agilent2	<60	250.2	LIVING	Primary	Female
TCGA-06-0175-01	m6AclusterA	TCGA_Agilent2	>=60	121.2	DECEASED	Primary	Male
TCGA-26-1443-01	m6AclusterB	TCGA_Agilent2	>=60	213.9	LIVING	Primary	Female
TCGA-06-0410-01	m6AclusterB	TCGA_Agilent2	>=60	141	DECEASED	Primary	Female
TCGA-02-0025-01	m6AclusterB	TCGA_Agilent2	<60	1281.3	DECEASED	Primary	Male
TCGA-26-1440-01	m6AclusterA	TCGA_Agilent2	<60	291.6	LIVING	Primary	Male
TCGA-32-1970-01	m6AclusterA	TCGA_Agilent2	<60	461.1	DECEASED	Primary	Male
TCGA-08-0375-01	m6AclusterA	TCGA_Agilent2	<60	366.6	DECEASED	Primary	Female
TCGA-16-0848-01	m6AclusterB	TCGA_Agilent2	<60	527.4	DECEASED	Primary	Male
TCGA-19-1389-01	m6AclusterB	TCGA_Agilent2	<60	138.9	DECEASED	Primary	Male
TCGA-06-2566-01	m6AclusterB	TCGA_Agilent2	<60	179.4	DECEASED	Primary	Female
TCGA-12-0620-01	m6AclusterB	TCGA_Agilent2	<60	313.5	DECEASED	Primary	Male
TCGA-28-2502-01	m6AclusterB	TCGA_Agilent2	>=60	19.8	LIVING	Primary	Male
TCGA-06-0394-01	m6AclusterA	TCGA_Agilent2	<60	324.3	DECEASED	Primary	Male
TCGA-08-0246-01	m6AclusterB	TCGA_Agilent2	<60	125.1	DECEASED	Primary	Female
TCGA-19-1392-01	m6AclusterB	TCGA_Agilent2	>=60	109.5	DECEASED	Primary	Female
TCGA-06-0149-01	m6AclusterB	TCGA_Agilent2	>=60	258.3	DECEASED	Primary	Female
TCGA-08-0354-01	m6AclusterB	TCGA_Agilent2	<60	538.2	DECEASED	Primary	Female
TCGA-02-0339-01	m6AclusterA	TCGA_Agilent2	>=60	371.7	DECEASED	Primary	Male
TCGA-06-2563-01	m6AclusterA	TCGA_Agilent2	>=60	918.6	LIVING	Primary	Female
TCGA-02-0079-01	m6AclusterB	TCGA_Agilent2	<60	816.9	DECEASED	Primary	Male
TCGA-32-2634-01	m6AclusterA	TCGA_Agilent2	>=60	683.1	LIVING	Primary	Male
TCGA-16-1062-01	m6AclusterA	TCGA_Agilent2	<60	636.6	DECEASED	Primary	Female
TCGA-16-0846-01	m6AclusterB	TCGA_Agilent2	>=60	117.3	DECEASED	Primary	Male
TCGA-12-1098-01	m6AclusterB	TCGA_Agilent2	>=60	119.4	DECEASED	Primary	Female
TCGA-12-0829-01	m6AclusterB	TCGA_Agilent2	>=60	617.1	DECEASED	Primary	Male
TCGA-06-2562-01	m6AclusterA	TCGA_Agilent2	>=60	376.5	DECEASED	Primary	Male
TCGA-12-3644-01	m6AclusterB	TCGA_Agilent2	<60	1791.6	DECEASED	Primary	Female
TCGA-16-1047-01	m6AclusterA	TCGA_Agilent2	>=60	137.1	DECEASED	Primary	Female
TCGA-19-1390-01	m6AclusterA	TCGA_Agilent2	>=60	760.8	DECEASED	Primary	Female
TCGA-06-1805-01	m6AclusterA	TCGA_Agilent2	<60	1016.1	LIVING	Primary	Female
TCGA-08-0386-01	m6AclusterA	TCGA_Agilent2	>=60	540	DECEASED	Primary	Male
TCGA-41-2575-01	m6AclusterB	TCGA_Agilent2	>=60	285.9	DECEASED	Primary	Male
TCGA-12-0778-01	m6AclusterB	TCGA_Agilent2	<60	447.3	DECEASED	Primary	Male
TCGA-12-3652-01	m6AclusterA	TCGA_Agilent2	>=60	1046.7	DECEASED	Primary	Male
TCGA-41-3392-01	m6AclusterB	TCGA_Agilent2	>=60	29.7	DECEASED	Primary	Male
TCGA-06-0882-01	m6AclusterB	TCGA_Agilent2	<60	622.8	DECEASED	Primary	Male
TCGA-16-0850-01	m6AclusterA	TCGA_Agilent2	<60	490.8	DECEASED	Primary	Female
TCGA-08-0385-01	m6AclusterB	TCGA_Agilent2	>=60	80.7	DECEASED	Primary	Male
TCGA-26-5136-01	m6AclusterA	TCGA_Agilent2	>=60	568.8	DECEASED	Primary	Female
TCGA-28-5207-01	m6AclusterA	TCGA_Agilent2	>=60	338.1	DECEASED	Primary	Male
TCGA-06-5418-01	m6AclusterB	TCGA_Agilent2	>=60	81.9	DECEASED	Primary	Female
TCGA-76-4932-01	m6AclusterA	TCGA_Agilent2	<60	1437	DECEASED	Primary	Female
TCGA-12-5295-01	m6AclusterB	TCGA_Agilent2	>=60	447.3	DECEASED	Primary	Female
TCGA-76-4934-01	m6AclusterB	TCGA_Agilent2	>=60	75.9	DECEASED	Primary	Female
TCGA-28-5216-01	m6AclusterB	TCGA_Agilent2	<60	408.9	LIVING	Primary	Male
TCGA-76-4929-01	m6AclusterA	TCGA_Agilent2	>=60	109.5	DECEASED	Primary	Female
TCGA-12-5299-01	m6AclusterA	TCGA_Agilent2	<60	96.6	DECEASED	Primary	Female
TCGA-26-5133-01	m6AclusterA	TCGA_Agilent2	<60	445.5	LIVING	Primary	Male
TCGA-26-5139-01	m6AclusterA	TCGA_Agilent2	>=60	47.4	LIVING	Primary	Female
TCGA-76-4935-01	m6AclusterA	TCGA_Agilent2	<60	1104.9	DECEASED	Primary	Female
TCGA-06-5414-01	m6AclusterA	TCGA_Agilent2	>=60	269.1	LIVING	Primary	Male
TCGA-06-5416-01	m6AclusterA	TCGA_Agilent2	<60	201	LIVING	Primary	Female
TCGA-28-5204-01	m6AclusterA	TCGA_Agilent2	>=60	447.3	DECEASED	Primary	Male
TCGA-28-5220-01	m6AclusterB	TCGA_Agilent2	>=60	382.5	DECEASED	Primary	Male
TCGA-76-4926-01	m6AclusterA	TCGA_Agilent2	>=60	135.9	DECEASED	Primary	Male
TCGA-26-5132-01	m6AclusterA	TCGA_Agilent2	>=60	282	LIVING	Primary	Male
TCGA-76-4925-01	m6AclusterA	TCGA_Agilent2	>=60	144	DECEASED	Primary	Male
TCGA-28-5208-01	m6AclusterA	TCGA_Agilent2	<60	536.1	DECEASED	Primary	Male
TCGA-32-5222-01	m6AclusterB	TCGA_Agilent2	>=60	576.6	DECEASED	Primary	Male
TCGA-06-5415-01	m6AclusterA	TCGA_Agilent2	>=60	256.2	LIVING	Primary	Male
TCGA-28-5215-01	m6AclusterA	TCGA_Agilent2	>=60	330.3	DECEASED	Primary	Female
TCGA-28-5213-01	m6AclusterB	TCGA_Agilent2	>=60	937.2	LIVING	Primary	Male
TCGA-28-5209-01	m6AclusterA	TCGA_Agilent2	>=60	435.6	LIVING	Primary	Female
TCGA-76-4931-01	m6AclusterA	TCGA_Agilent2	>=60	275.1	DECEASED	Primary	Female
TCGA-28-5214-01	m6AclusterB	TCGA_Agilent2	<60	702.6	DECEASED	Primary	Male
TCGA-26-5135-01	m6AclusterA	TCGA_Agilent2	>=60	266.1	DECEASED	Primary	Female
TCGA-28-5219-01	m6AclusterA	TCGA_Agilent2	<60	680.1	LIVING	Primary	Female
TCGA-76-4927-01	m6AclusterA	TCGA_Agilent2	<60	527.4	DECEASED	Primary	Male
TCGA-06-5417-01	m6AclusterA	TCGA_Agilent2	<60	152.7	LIVING	Primary	Female
TCGA-28-5218-01	m6AclusterA	TCGA_Agilent2	>=60	154.8	DECEASED	Primary	Male
TCGA-76-4928-01	m6AclusterA	TCGA_Agilent2	>=60	92.7	DECEASED	Primary	Female
TCGA-12-5301-01	m6AclusterB	TCGA_Agilent2	<60	61.2	DECEASED	Primary	Male
TCGA-26-5134-01	m6AclusterA	TCGA_Agilent2	>=60	164.7	LIVING	Primary	Male
TCGA-32-4208-01	m6AclusterB	TCGA_Agilent2	<60	633.6	LIVING	Primary	Male
TCGA-32-1978-01	m6AclusterA	TCGA_Agilent2	<60	474.9	DECEASED	Primary	Male
TCGA-32-2494-01	m6AclusterB	TCGA_Agilent2	<60	622.8	DECEASED	Primary	Female
TCGA-41-2572-01	m6AclusterB	TCGA_Agilent2	>=60	400.2	DECEASED	Primary	Male
TCGA-26-1439-01	m6AclusterA	TCGA_Agilent2	>=60	415.8	DECEASED	Primary	Male
TCGA-32-1991-01	m6AclusterA	TCGA_Agilent2	>=60	507.6	DECEASED	Primary	Male
TCGA-32-4213-01	m6AclusterB	TCGA_Agilent2	<60	595.2	LIVING	Primary	Female
TCGA-32-4210-01	m6AclusterA	TCGA_Agilent2	>=60	111.3	DECEASED	Primary	Male
TCGA-32-1977-01	m6AclusterB	TCGA_Agilent2	>=60	3	LIVING	Primary	Female
TCGA-32-2495-01	m6AclusterB	TCGA_Agilent2	<60	450.3	DECEASED	Primary	Female
TCGA-19-1790-01	m6AclusterB	TCGA_Agilent2	<60	151.8	DECEASED	Primary	Male
TCGA-41-3393-01	m6AclusterB	TCGA_Agilent2	>=60	132.9	DECEASED	Primary	Female
TCGA-32-4719-01	m6AclusterA	TCGA_Agilent2	>=60	325.2	DECEASED	Primary	Male
TCGA-32-1973-01	m6AclusterA	TCGA_Agilent2	<60	631.8	DECEASED	Primary	Male
TCGA-19-4068-01	m6AclusterA	TCGA_Agilent2	>=60	135	LIVING	Primary	Female
TCGA-41-4097-01	m6AclusterA	TCGA_Agilent2	>=60	6	DECEASED	Primary	Female
TCGA-32-2491-01	m6AclusterB	TCGA_Agilent2	>=60	366.6	DECEASED	Primary	Male
TCGA-19-2631-01	m6AclusterA	TCGA_Agilent2	>=60	210	DECEASED	Primary	Female
TCGA-32-1987-01	m6AclusterA	TCGA_Agilent2	<60	445.5	DECEASED	Primary	Female
TCGA-32-4211-01	m6AclusterB	TCGA_Agilent2	<60	377.4	DECEASED	Primary	Male
TCGA-06-0939-01	m6AclusterB	TCGA_Agilent2	>=60	802.2	DECEASED	Primary	Female
TCGA-41-3915-01	m6AclusterB	TCGA_Agilent2	<60	354.9	DECEASED	Primary	Male
TCGA-14-4157-01	m6AclusterA	TCGA_Agilent2	<60	102.6	LIVING	Primary	Male
TCGA-06-5410-01	m6AclusterB	TCGA_Agilent2	>=60	106.5	DECEASED	Primary	Female
TCGA-81-5911-01	m6AclusterA	TCGA_Agilent2	<60	531.3	LIVING	Primary	Male
TCGA-19-5953-01	m6AclusterA	TCGA_Agilent2	<60	141.9	DECEASED	Primary	Male
TCGA-76-6286-01	m6AclusterA	TCGA_Agilent2	>=60	628.8	DECEASED	Primary	Male
TCGA-06-6389-01	m6AclusterA	TCGA_Agilent2	<60	233.7	LIVING	Primary	Female
TCGA-41-6646-01	m6AclusterA	TCGA_Agilent2	>=60	373.5	DECEASED	Primary	Female
TCGA-87-5896-01	m6AclusterA	TCGA_Agilent2	<60	788.4	LIVING	Primary	Female
TCGA-06-5408-01	m6AclusterA	TCGA_Agilent2	<60	351.9	DECEASED	Primary	Female
TCGA-76-6664-01	m6AclusterA	TCGA_Agilent2	<60	1085.1	LIVING	Primary	Female
TCGA-15-1444-01	m6AclusterA	TCGA_Agilent2	<60	1514.7	DECEASED	Primary	Male
TCGA-76-6656-01	m6AclusterA	TCGA_Agilent2	>=60	144.9	DECEASED	Primary	Male
TCGA-19-5955-01	m6AclusterA	TCGA_Agilent2	>=60	53.1	DECEASED	Primary	Male
TCGA-06-5859-01	m6AclusterA	TCGA_Agilent2	>=60	137.1	LIVING	Primary	Male
TCGA-76-6282-01	m6AclusterA	TCGA_Agilent2	>=60	511.5	DECEASED	Primary	Male
TCGA-06-6695-01	m6AclusterA	TCGA_Agilent2	>=60	249.3	LIVING	Primary	Male
TCGA-06-1804-01	m6AclusterA	TCGA_Agilent2	>=60	408	DECEASED	Primary	Female
TCGA-28-6450-01	m6AclusterA	TCGA_Agilent2	>=60	162.6	DECEASED	Primary	Male
TCGA-06-6694-01	m6AclusterA	TCGA_Agilent2	>=60	220.8	DECEASED	Primary	Female
TCGA-41-5651-01	m6AclusterA	TCGA_Agilent2	<60	453.3	DECEASED	Primary	Female
TCGA-06-6698-01	m6AclusterA	TCGA_Agilent2	<60	142.8	LIVING	Primary	Female
TCGA-74-6584-01	m6AclusterA	TCGA_Agilent2	<60	224.7	LIVING	Primary	Female
TCGA-74-6573-01	m6AclusterA	TCGA_Agilent2	>=60	103.5	DECEASED	Primary	Male
TCGA-06-6700-01	m6AclusterB	TCGA_Agilent2	>=60	142.8	LIVING	Primary	Male
TCGA-32-1980-01	m6AclusterB	TCGA_Agilent2	>=60	35.4	DECEASED	Primary	Male
TCGA-76-6660-01	m6AclusterA	TCGA_Agilent2	>=60	112.5	DECEASED	Primary	Male
TCGA-76-6191-01	m6AclusterA	TCGA_Agilent2	<60	500.7	DECEASED	Primary	Male
TCGA-06-5856-01	m6AclusterA	TCGA_Agilent2	<60	112.5	DECEASED	Primary	Male
TCGA-26-1442-01	m6AclusterA	TCGA_Agilent2	<60	939.3	LIVING	Primary	Male
TCGA-26-6173-01	m6AclusterA	TCGA_Agilent2	<60	237.6	LIVING	Primary	Male
TCGA-19-5958-01	m6AclusterA	TCGA_Agilent2	<60	421.8	DECEASED	Primary	Male
TCGA-19-5951-01	m6AclusterA	TCGA_Agilent2	>=60	240.6	DECEASED	Primary	Female
TCGA-76-6285-01	m6AclusterA	TCGA_Agilent2	>=60	250.2	DECEASED	Primary	Female
TCGA-32-1979-01	m6AclusterB	TCGA_Agilent2	>=60	584.4	DECEASED	Primary	Female
TCGA-14-0740-01	m6AclusterB	TCGA_Agilent2	>=60	358.8	DECEASED	Primary	Male
TCGA-19-5947-01	m6AclusterB	TCGA_Agilent2	<60	199.2	DECEASED	Primary	Female
TCGA-14-1395-01	m6AclusterA	TCGA_Agilent2	<60	41.4	DECEASED	Primary	Male
TCGA-19-5954-01	m6AclusterA	TCGA_Agilent2	>=60	362.7	DECEASED	Primary	Female
TCGA-28-5211-01	m6AclusterA	TCGA_Agilent2	<60	352.8	LIVING	Primary	Male
TCGA-76-6662-01	m6AclusterA	TCGA_Agilent2	<60	1032.9	DECEASED	Primary	Male
TCGA-19-5952-01	m6AclusterA	TCGA_Agilent2	>=60	566.7	DECEASED	Primary	Male
TCGA-76-6280-01	m6AclusterA	TCGA_Agilent2	<60	341.1	DECEASED	Primary	Male
TCGA-06-5411-01	m6AclusterB	TCGA_Agilent2	<60	250.2	DECEASED	Primary	Male
TCGA-76-6661-01	m6AclusterA	TCGA_Agilent2	<60	716.4	DECEASED	Primary	Male
TCGA-06-0650-01	m6AclusterB	TCGA_Agilent2	<60	706.5	DECEASED	Primary	Female
TCGA-81-5910-01	m6AclusterA	TCGA_Agilent2	>=60	48.3	DECEASED	Primary	Male
TCGA-74-6575-01	m6AclusterA	TCGA_Agilent2	>=60	626.7	LIVING	Primary	Female
TCGA-26-6174-01	m6AclusterA	TCGA_Agilent2	>=60	69.9	LIVING	Primary	Female
TCGA-06-6391-01	m6AclusterA	TCGA_Agilent2	<60	44.4	DECEASED	Primary	Female
TCGA-06-6697-01	m6AclusterA	TCGA_Agilent2	>=60	385.2	LIVING	Primary	Male
TCGA-06-6701-01	m6AclusterA	TCGA_Agilent2	>=60	148.8	LIVING	Primary	Male
TCGA-06-6693-01	m6AclusterA	TCGA_Agilent2	>=60	3614.1	DECEASED	Primary	Female
TCGA-06-5412-01	m6AclusterB	TCGA_Agilent2	>=60	135.9	DECEASED	Primary	Female
TCGA-19-5959-01	m6AclusterA	TCGA_Agilent2	>=60	503.7	DECEASED	Primary	Female
TCGA-74-6581-01	m6AclusterA	TCGA_Agilent2	>=60	246.3	LIVING	Primary	Male
TCGA-74-6577-01	m6AclusterA	TCGA_Agilent2	<60	130.2	LIVING	Primary	Male
TCGA-14-0862-01	m6AclusterB	TCGA_Agilent2	>=60	86.7	DECEASED	Primary	Male
TCGA-14-1043-01	m6AclusterA	TCGA_Agilent2	>=60	23.7	DECEASED	Primary	Male
TCGA-76-6193-01	m6AclusterB	TCGA_Agilent2	>=60	80.7	DECEASED	Primary	Male
TCGA-06-6388-01	m6AclusterA	TCGA_Agilent2	>=60	156.6	DECEASED	Primary	Female
TCGA-14-0781-01	m6AclusterA	TCGA_Agilent2	<60	28.5	DECEASED	Primary	Male
TCGA-06-6390-01	m6AclusterA	TCGA_Agilent2	<60	161.7	DECEASED	Primary	Male
TCGA-76-6283-01	m6AclusterA	TCGA_Agilent2	>=60	162.6	DECEASED	Primary	Female
TCGA-76-6657-01	m6AclusterA	TCGA_Agilent2	>=60	150.9	DECEASED	Primary	Male
TCGA-06-5413-01	m6AclusterA	TCGA_Agilent2	>=60	264	LIVING	Primary	Male
TCGA-14-1450-01	m6AclusterB	TCGA_Agilent2	<60	1762.2	LIVING	Primary	Female
TCGA-74-6578-01	m6AclusterA	TCGA_Agilent2	<60	429.6	LIVING	Primary	Male
TCGA-19-5956-01	m6AclusterA	TCGA_Agilent2	<60	674.1	DECEASED	Primary	Female
TCGA-06-6699-01	m6AclusterA	TCGA_Agilent2	<60	46.2	LIVING	Primary	Female
CGGA_11	m6AclusterB	CGGA.mRNA_array	<60	155	DECEASED	Primary	Female
CGGA_124	m6AclusterB	CGGA.mRNA_array	<60	414	DECEASED	Primary	Male
CGGA_126	m6AclusterB	CGGA.mRNA_array	<60	1177	DECEASED	Primary	Female
CGGA_168	m6AclusterB	CGGA.mRNA_array	<60	3086	LIVING	Primary	Male
CGGA_172	m6AclusterA	CGGA.mRNA_array	<60	462	DECEASED	Primary	Female
CGGA_195	m6AclusterB	CGGA.mRNA_array	<60	486	DECEASED	Primary	Male
CGGA_203	m6AclusterA	CGGA.mRNA_array	<60	188	DECEASED	Primary	Male
CGGA_221	m6AclusterB	CGGA.mRNA_array	<60	287	DECEASED	Primary	Male
CGGA_225	m6AclusterA	CGGA.mRNA_array	<60	1741	DECEASED	Primary	Male
CGGA_240	m6AclusterA	CGGA.mRNA_array	<60	386	DECEASED	Primary	Male
CGGA_287	m6AclusterB	CGGA.mRNA_array	<60	571	DECEASED	Primary	Female
CGGA_292	m6AclusterA	CGGA.mRNA_array	<60	812	DECEASED	Primary	Male
CGGA_370	m6AclusterB	CGGA.mRNA_array	<60	338	DECEASED	Primary	Male
CGGA_373	m6AclusterA	CGGA.mRNA_array	<60	281	DECEASED	Primary	Female
CGGA_375	m6AclusterB	CGGA.mRNA_array	<60	657	DECEASED	Primary	Male
CGGA_377	m6AclusterA	CGGA.mRNA_array	<60	398	DECEASED	Primary	Male
CGGA_380	m6AclusterA	CGGA.mRNA_array	<60	165	DECEASED	Primary	Male
CGGA_404	m6AclusterB	CGGA.mRNA_array	>=60	NA	NA	Primary	Male
CGGA_419	m6AclusterB	CGGA.mRNA_array	<60	198	DECEASED	Primary	Male
CGGA_437	m6AclusterB	CGGA.mRNA_array	<60	1025	DECEASED	Primary	Female
CGGA_439	m6AclusterB	CGGA.mRNA_array	<60	3813	DECEASED	Primary	Female
CGGA_442	m6AclusterA	CGGA.mRNA_array	>=60	1555	DECEASED	Primary	Male
CGGA_444	m6AclusterB	CGGA.mRNA_array	>=60	225	DECEASED	Primary	Female
CGGA_451	m6AclusterB	CGGA.mRNA_array	>=60	795	DECEASED	Primary	Male
CGGA_454	m6AclusterA	CGGA.mRNA_array	<60	412	DECEASED	Primary	Male
CGGA_512	m6AclusterB	CGGA.mRNA_array	<60	4371	LIVING	Primary	Male
CGGA_527	m6AclusterA	CGGA.mRNA_array	<60	439	DECEASED	Primary	Male
CGGA_547	m6AclusterA	CGGA.mRNA_array	<60	1337	DECEASED	Primary	Male
CGGA_549	m6AclusterA	CGGA.mRNA_array	<60	413	DECEASED	Primary	Female
CGGA_557	m6AclusterA	CGGA.mRNA_array	<60	257	DECEASED	Primary	Female
CGGA_570	m6AclusterB	CGGA.mRNA_array	>=60	3602	LIVING	Primary	Female
CGGA_573	m6AclusterA	CGGA.mRNA_array	<60	946	DECEASED	Primary	Male
CGGA_575	m6AclusterA	CGGA.mRNA_array	<60	551	DECEASED	Primary	Male
CGGA_588	m6AclusterB	CGGA.mRNA_array	<60	773	DECEASED	Primary	Male
CGGA_593	m6AclusterA	CGGA.mRNA_array	<60	242	DECEASED	Primary	Male
CGGA_594	m6AclusterB	CGGA.mRNA_array	<60	4318	LIVING	Primary	Female
CGGA_597	m6AclusterA	CGGA.mRNA_array	<60	733	DECEASED	Primary	Female
CGGA_606	m6AclusterA	CGGA.mRNA_array	>=60	325	DECEASED	Primary	Male
CGGA_609	m6AclusterA	CGGA.mRNA_array	<60	512	LIVING	Primary	Female
CGGA_612	m6AclusterA	CGGA.mRNA_array	<60	2023	DECEASED	Primary	Male
CGGA_640	m6AclusterB	CGGA.mRNA_array	<60	4117	LIVING	Primary	Male
CGGA_646	m6AclusterB	CGGA.mRNA_array	>=60	363	DECEASED	Primary	Female
CGGA_649	m6AclusterB	CGGA.mRNA_array	<60	147	DECEASED	Primary	Female
CGGA_654	m6AclusterB	CGGA.mRNA_array	<60	626	DECEASED	Primary	Male
CGGA_664	m6AclusterA	CGGA.mRNA_array	<60	4224	LIVING	Primary	Female
CGGA_683	m6AclusterB	CGGA.mRNA_array	<60	688	LIVING	Primary	Female
CGGA_684	m6AclusterA	CGGA.mRNA_array	<60	714	DECEASED	Primary	Male
CGGA_686	m6AclusterB	CGGA.mRNA_array	<60	348	DECEASED	Primary	Male
CGGA_693	m6AclusterB	CGGA.mRNA_array	<60	1195	DECEASED	Primary	Female
CGGA_699	m6AclusterB	CGGA.mRNA_array	<60	570	DECEASED	Primary	Female
CGGA_709	m6AclusterA	CGGA.mRNA_array	<60	406	DECEASED	Primary	Female
CGGA_713	m6AclusterA	CGGA.mRNA_array	<60	27	DECEASED	Primary	Male
CGGA_714	m6AclusterA	CGGA.mRNA_array	<60	400	DECEASED	Primary	Female
CGGA_729	m6AclusterA	CGGA.mRNA_array	>=60	687	DECEASED	Primary	Female
CGGA_741	m6AclusterB	CGGA.mRNA_array	<60	396	DECEASED	Primary	Female
CGGA_764	m6AclusterA	CGGA.mRNA_array	<60	67	DECEASED	Primary	Male
CGGA_775	m6AclusterB	CGGA.mRNA_array	>=60	255	DECEASED	Primary	Male
CGGA_778	m6AclusterB	CGGA.mRNA_array	<60	175	DECEASED	Primary	Female
CGGA_907	m6AclusterB	CGGA.mRNA_array	>=60	177	DECEASED	Primary	Male
CGGA_156	m6AclusterB	CGGA.mRNA_array	<60	179	DECEASED	Primary	Male
CGGA_178	m6AclusterA	CGGA.mRNA_array	<60	972	DECEASED	Primary	Male
CGGA_205	m6AclusterB	CGGA.mRNA_array	>=60	292	DECEASED	Primary	Male
CGGA_210	m6AclusterB	CGGA.mRNA_array	>=60	300	DECEASED	Primary	Female
CGGA_218	m6AclusterA	CGGA.mRNA_array	<60	313	DECEASED	Primary	Male
CGGA_255	m6AclusterB	CGGA.mRNA_array	<60	591	DECEASED	Primary	Female
CGGA_264	m6AclusterA	CGGA.mRNA_array	<60	383	DECEASED	Primary	Male
CGGA_308	m6AclusterA	CGGA.mRNA_array	<60	823	DECEASED	Primary	Female
CGGA_311	m6AclusterA	CGGA.mRNA_array	<60	230	DECEASED	Primary	Male
CGGA_324	m6AclusterB	CGGA.mRNA_array	<60	336	DECEASED	Primary	Male
CGGA_335	m6AclusterA	CGGA.mRNA_array	<60	385	DECEASED	Primary	Male
CGGA_345	m6AclusterA	CGGA.mRNA_array	<60	1547	LIVING	Primary	Female
CGGA_346	m6AclusterB	CGGA.mRNA_array	<60	104	DECEASED	Primary	Male
CGGA_366	m6AclusterB	CGGA.mRNA_array	<60	255	DECEASED	Primary	Male
CGGA_371	m6AclusterB	CGGA.mRNA_array	<60	811	DECEASED	Primary	Male
CGGA_401	m6AclusterA	CGGA.mRNA_array	<60	168	DECEASED	Primary	Female
CGGA_436	m6AclusterA	CGGA.mRNA_array	<60	955	DECEASED	Primary	Male
CGGA_464	m6AclusterB	CGGA.mRNA_array	<60	403	DECEASED	Primary	Female
CGGA_504	m6AclusterA	CGGA.mRNA_array	<60	563	DECEASED	Primary	Female
CGGA_628	m6AclusterB	CGGA.mRNA_array	<60	480	DECEASED	Primary	Male
CGGA_734	m6AclusterA	CGGA.mRNA_array	<60	466	DECEASED	Primary	Female
CGGA_D60	m6AclusterB	CGGA.mRNA_array	<60	196	DECEASED	Secondary	Male
CGGA_104	m6AclusterB	CGGA.mRNA_array	<60	440	LIVING	Secondary	Male
CGGA_462	m6AclusterB	CGGA.mRNA_array	<60	361	DECEASED	Secondary	Male
CGGA_798	m6AclusterA	CGGA.mRNA_array	<60	136	DECEASED	Secondary	Female
GSM2198606	m6AclusterB	GSE83300	<60	518.7	DECEASED	glioblastoma multiforme tissue sample01	F
GSM2198607	m6AclusterB	GSE83300	<60	1281.3	LIVING	glioblastoma multiforme tissue sample02	F
GSM2198608	m6AclusterA	GSE83300	<60	375.9	DECEASED	glioblastoma multiforme tissue sample03	M
GSM2198609	m6AclusterB	GSE83300	>=60	249.6	DECEASED	glioblastoma multiforme tissue sample04	M
GSM2198610	m6AclusterA	GSE83300	<60	407.4	DECEASED	glioblastoma multiforme tissue sample05	F
GSM2198611	m6AclusterB	GSE83300	<60	766.5	DECEASED	glioblastoma multiforme tissue sample06	M
GSM2198612	m6AclusterA	GSE83300	<60	1387.8	DECEASED	glioblastoma multiforme tissue sample07	M
GSM2198613	m6AclusterA	GSE83300	>=60	948.9	LIVING	glioblastoma multiforme tissue sample08	M
GSM2198614	m6AclusterA	GSE83300	<60	134.1	DECEASED	glioblastoma multiforme tissue sample09	F
GSM2198615	m6AclusterB	GSE83300	<60	499.2	DECEASED	glioblastoma multiforme tissue sample10	F
GSM2198616	m6AclusterA	GSE83300	<60	546.3	DECEASED	glioblastoma multiforme tissue sample11	M
GSM2198617	m6AclusterB	GSE83300	<60	1286.1	LIVING	glioblastoma multiforme tissue sample12	F
GSM2198618	m6AclusterA	GSE83300	<60	377.7	DECEASED	glioblastoma multiforme tissue sample13	M
GSM2198619	m6AclusterB	GSE83300	<60	1047.6	LIVING	glioblastoma multiforme tissue sample14	F
GSM2198620	m6AclusterB	GSE83300	<60	490.2	DECEASED	glioblastoma multiforme tissue sample15	M
GSM2198621	m6AclusterB	GSE83300	<60	397.5	DECEASED	glioblastoma multiforme tissue sample16	F
GSM2198622	m6AclusterA	GSE83300	<60	195.3	DECEASED	glioblastoma multiforme tissue sample17	M
GSM2198623	m6AclusterA	GSE83300	>=60	320.4	DECEASED	glioblastoma multiforme tissue sample18	M
GSM2198624	m6AclusterA	GSE83300	<60	1010.1	DECEASED	glioblastoma multiforme tissue sample19	F
GSM2198625	m6AclusterB	GSE83300	<60	351	DECEASED	glioblastoma multiforme tissue sample20	M
GSM2198626	m6AclusterA	GSE83300	<60	814.8	DECEASED	glioblastoma multiforme tissue sample21	M
GSM2198627	m6AclusterB	GSE83300	<60	659.7	LIVING	glioblastoma multiforme tissue sample22	F
GSM2198628	m6AclusterA	GSE83300	<60	239.7	DECEASED	glioblastoma multiforme tissue sample23	M
GSM2198629	m6AclusterA	GSE83300	<60	390.6	DECEASED	glioblastoma multiforme tissue sample24	F
GSM2198630	m6AclusterB	GSE83300	<60	1074	DECEASED	glioblastoma multiforme tissue sample25	F
GSM2198631	m6AclusterB	GSE83300	<60	413.4	DECEASED	glioblastoma multiforme tissue sample26	M
GSM2198632	m6AclusterA	GSE83300	<60	779.1	LIVING	glioblastoma multiforme tissue sample27	?
GSM2198633	m6AclusterB	GSE83300	<60	576	DECEASED	glioblastoma multiforme tissue sample28	F
GSM2198634	m6AclusterA	GSE83300	<60	525.6	DECEASED	glioblastoma multiforme tissue sample29	M
GSM2198635	m6AclusterB	GSE83300	>=60	522.6	DECEASED	glioblastoma multiforme tissue sample30	F
GSM2198636	m6AclusterA	GSE83300	<60	473.4	LIVING	glioblastoma multiforme tissue sample31	F
GSM2198637	m6AclusterA	GSE83300	<60	277.2	DECEASED	glioblastoma multiforme tissue sample32	F
GSM2198638	m6AclusterA	GSE83300	<60	455.7	DECEASED	glioblastoma multiforme tissue sample33	F
GSM2198639	m6AclusterB	GSE83300	<60	1273.2	LIVING	glioblastoma multiforme tissue sample34	M
GSM2198640	m6AclusterB	GSE83300	<60	276.3	LIVING	glioblastoma multiforme tissue sample35	F
GSM2198641	m6AclusterB	GSE83300	<60	555.3	DECEASED	glioblastoma multiforme tissue sample36	F
GSM2198642	m6AclusterA	GSE83300	<60	557.4	DECEASED	glioblastoma multiforme tissue sample37	F
GSM2198643	m6AclusterB	GSE83300	<60	357.9	DECEASED	glioblastoma multiforme tissue sample38	F
GSM2198644	m6AclusterB	GSE83300	<60	541.5	DECEASED	glioblastoma multiforme tissue sample39	F
GSM2198645	m6AclusterB	GSE83300	<60	585	DECEASED	glioblastoma multiforme tissue sample40	M
GSM2198646	m6AclusterA	GSE83300	<60	684.6	LIVING	glioblastoma multiforme tissue sample41	F
GSM2198647	m6AclusterA	GSE83300	<60	185.4	DECEASED	glioblastoma multiforme tissue sample42	M
GSM2198648	m6AclusterA	GSE83300	<60	331.5	DECEASED	glioblastoma multiforme tissue sample43	M
GSM2198649	m6AclusterB	GSE83300	<60	582.9	DECEASED	glioblastoma multiforme tissue sample44	F
GSM2198650	m6AclusterA	GSE83300	>=60	295.8	DECEASED	glioblastoma multiforme tissue sample45	F
GSM2198651	m6AclusterB	GSE83300	<60	643.2	LIVING	glioblastoma multiforme tissue sample46	M
GSM2198652	m6AclusterA	GSE83300	<60	952.8	DECEASED	glioblastoma multiforme tissue sample47	M
GSM2198653	m6AclusterA	GSE83300	<60	333.3	DECEASED	glioblastoma multiforme tissue sample48	M
GSM2198654	m6AclusterA	GSE83300	<60	380.7	DECEASED	glioblastoma multiforme tissue sample49	M
GSM2198655	m6AclusterB	GSE83300	<60	283.2	DECEASED	glioblastoma multiforme tissue sample50	M
GSM1912920	m6AclusterA	GSE74187	>=60	1024	DECEASED	GBM patient	1
GSM1912921	m6AclusterA	GSE74187	>=60	878	DECEASED	GBM patient	1
GSM1912922	m6AclusterB	GSE74187	>=60	356	DECEASED	GBM patient	1
GSM1912923	m6AclusterB	GSE74187	>=60	657	DECEASED	GBM patient	1
GSM1912924	m6AclusterA	GSE74187	>=60	188	DECEASED	GBM patient	1
GSM1912925	m6AclusterA	GSE74187	>=60	588	DECEASED	GBM patient	1
GSM1912926	m6AclusterB	GSE74187	>=60	1234	LIVING	GBM patient	0
GSM1912927	m6AclusterA	GSE74187	>=60	385	DECEASED	GBM patient	1
GSM1912928	m6AclusterA	GSE74187	>=60	710	LIVING	GBM patient	1
GSM1912929	m6AclusterB	GSE74187	>=60	175	DECEASED	GBM patient	1
GSM1912930	m6AclusterA	GSE74187	>=60	386	DECEASED	GBM patient	1
GSM1912931	m6AclusterB	GSE74187	>=60	419	DECEASED	GBM patient	1
GSM1912932	m6AclusterB	GSE74187	>=60	414	DECEASED	GBM patient	1
GSM1912933	m6AclusterA	GSE74187	>=60	559	LIVING	GBM patient	0
GSM1912934	m6AclusterB	GSE74187	>=60	1299	LIVING	GBM patient	1
GSM1912935	m6AclusterA	GSE74187	>=60	1407	DECEASED	GBM patient	1
GSM1912936	m6AclusterA	GSE74187	>=60	694	LIVING	GBM patient	1
GSM1912937	m6AclusterB	GSE74187	>=60	162	DECEASED	GBM patient	1
GSM1912938	m6AclusterB	GSE74187	>=60	640	DECEASED	GBM patient	1
GSM1912939	m6AclusterA	GSE74187	>=60	399	DECEASED	GBM patient	1
GSM1912940	m6AclusterA	GSE74187	>=60	1097	LIVING	GBM patient	0
GSM1912941	m6AclusterB	GSE74187	>=60	253	DECEASED	GBM patient	1
GSM1912942	m6AclusterA	GSE74187	>=60	413	DECEASED	GBM patient	1
GSM1912943	m6AclusterA	GSE74187	>=60	810	DECEASED	GBM patient	1
GSM1912944	m6AclusterA	GSE74187	>=60	325	DECEASED	GBM patient	1
GSM1912945	m6AclusterA	GSE74187	>=60	554	DECEASED	GBM patient	1
GSM1912946	m6AclusterB	GSE74187	>=60	312	DECEASED	GBM patient	1
GSM1912947	m6AclusterB	GSE74187	>=60	563	DECEASED	GBM patient	1
GSM1912948	m6AclusterA	GSE74187	>=60	961	LIVING	GBM patient	1
GSM1912949	m6AclusterA	GSE74187	>=60	27	DECEASED	GBM patient	1
GSM1912950	m6AclusterA	GSE74187	>=60	198	DECEASED	GBM patient	1
GSM1912951	m6AclusterA	GSE74187	>=60	565	DECEASED	GBM patient	1
GSM1912952	m6AclusterB	GSE74187	>=60	1165	LIVING	GBM patient	0
GSM1912953	m6AclusterA	GSE74187	>=60	285	DECEASED	GBM patient	1
GSM1912954	m6AclusterB	GSE74187	>=60	742	DECEASED	GBM patient	1
GSM1912955	m6AclusterB	GSE74187	>=60	396	DECEASED	GBM patient	1
GSM1912956	m6AclusterA	GSE74187	>=60	504	DECEASED	GBM patient	1
GSM1912957	m6AclusterA	GSE74187	>=60	554	DECEASED	GBM patient	1
GSM1912958	m6AclusterA	GSE74187	>=60	526	DECEASED	GBM patient	1
GSM1912959	m6AclusterA	GSE74187	>=60	714	DECEASED	GBM patient	1
GSM1912960	m6AclusterA	GSE74187	>=60	823	LIVING	GBM patient	0
GSM1912961	m6AclusterA	GSE74187	>=60	790	LIVING	GBM patient	0
GSM1912962	m6AclusterA	GSE74187	>=60	533	DECEASED	GBM patient	1
GSM1912963	m6AclusterB	GSE74187	>=60	363	DECEASED	GBM patient	1
GSM1912964	m6AclusterA	GSE74187	>=60	412	DECEASED	GBM patient	1
GSM1912965	m6AclusterB	GSE74187	>=60	364	DECEASED	GBM patient	1
GSM1912966	m6AclusterA	GSE74187	>=60	1304	LIVING	GBM patient	0
GSM1912967	m6AclusterA	GSE74187	>=60	455	DECEASED	GBM patient	1
GSM1912968	m6AclusterB	GSE74187	>=60	145	DECEASED	GBM patient	1
GSM1912969	m6AclusterB	GSE74187	>=60	584	DECEASED	GBM patient	1
GSM1912970	m6AclusterB	GSE74187	>=60	567	DECEASED	GBM patient	1
GSM1912971	m6AclusterA	GSE74187	>=60	414	DECEASED	GBM patient	1
GSM1912972	m6AclusterB	GSE74187	>=60	429	DECEASED	GBM patient	1
GSM1912973	m6AclusterB	GSE74187	>=60	653	LIVING	GBM patient	0
GSM1912974	m6AclusterB	GSE74187	>=60	145	LIVING	GBM patient	0
GSM1912975	m6AclusterA	GSE74187	>=60	313	DECEASED	GBM patient	1
GSM1912976	m6AclusterA	GSE74187	>=60	962	LIVING	GBM patient	1
GSM1912977	m6AclusterA	GSE74187	>=60	826	DECEASED	GBM patient	1
GSM1912978	m6AclusterA	GSE74187	>=60	257	DECEASED	GBM patient	1
GSM1912979	m6AclusterA	GSE74187	>=60	593	DECEASED	GBM patient	1
GSM1061661	m6AclusterB	GSE43378	<60	1300	DECEASED	Human brain tumor tissue from Glioma patient	Male
GSM1061662	m6AclusterB	GSE43378	>=60	352	DECEASED	Human brain tumor tissue from Glioma patient	Male
GSM1061663	m6AclusterB	GSE43378	<60	988	DECEASED	Human brain tumor tissue from Glioma patient	Male
GSM1061664	m6AclusterB	GSE43378	>=60	305	DECEASED	Human brain tumor tissue from Glioma patient	Male
GSM1061665	m6AclusterB	GSE43378	<60	417	DECEASED	Human brain tumor tissue from Glioma patient	Female
GSM1061666	m6AclusterA	GSE43378	>=60	617	DECEASED	Human brain tumor tissue from Glioma patient	Male
GSM1061667	m6AclusterA	GSE43378	<60	3020	LIVING	Human brain tumor tissue from Glioma patient	Male
GSM1061668	m6AclusterB	GSE43378	<60	506	DECEASED	Human brain tumor tissue from Glioma patient	Male
GSM1061669	m6AclusterA	GSE43378	>=60	396	DECEASED	Human brain tumor tissue from Glioma patient	Male
GSM1061670	m6AclusterA	GSE43378	<60	263	DECEASED	Human brain tumor tissue from Glioma patient	Male
GSM1061671	m6AclusterA	GSE43378	<60	698	DECEASED	Human brain tumor tissue from Glioma patient	Male
GSM1061672	m6AclusterA	GSE43378	>=60	286	DECEASED	Human brain tumor tissue from Glioma patient	Male
GSM1061673	m6AclusterB	GSE43378	<60	1189	DECEASED	Human brain tumor tissue from Glioma patient	Female
GSM1061674	m6AclusterB	GSE43378	<60	641	DECEASED	Human brain tumor tissue from Glioma patient	Female
GSM1061675	m6AclusterA	GSE43378	<60	630	DECEASED	Human brain tumor tissue from Glioma patient	Male
GSM1061676	m6AclusterA	GSE43378	>=60	405	DECEASED	Human brain tumor tissue from Glioma patient	Male
GSM1061677	m6AclusterB	GSE43378	>=60	1082	DECEASED	Human brain tumor tissue from Glioma patient	Male
GSM1061678	m6AclusterB	GSE43378	<60	2034	DECEASED	Human brain tumor tissue from Glioma patient	Female
GSM1061679	m6AclusterA	GSE43378	<60	111	DECEASED	Human brain tumor tissue from Glioma patient	Female
GSM1061680	m6AclusterA	GSE43378	<60	261	DECEASED	Human brain tumor tissue from Glioma patient	Male
GSM1061681	m6AclusterB	GSE43378	>=60	347	DECEASED	Human brain tumor tissue from Glioma patient	Male
GSM1061682	m6AclusterB	GSE43378	<60	268	DECEASED	Human brain tumor tissue from Glioma patient	Male
GSM1061683	m6AclusterB	GSE43378	>=60	350	DECEASED	Human brain tumor tissue from Glioma patient	Female
GSM1061684	m6AclusterA	GSE43378	<60	525	DECEASED	Human brain tumor tissue from Glioma patient	Male
GSM1061685	m6AclusterA	GSE43378	<60	1922	LIVING	Human brain tumor tissue from Glioma patient	Female
GSM1061686	m6AclusterB	GSE43378	>=60	1411	DECEASED	Human brain tumor tissue from Glioma patient	Male
GSM1061687	m6AclusterB	GSE43378	>=60	436	DECEASED	Human brain tumor tissue from Glioma patient	Male
GSM1061688	m6AclusterB	GSE43378	>=60	154	DECEASED	Human brain tumor tissue from Glioma patient	Female
GSM1061689	m6AclusterA	GSE43378	>=60	427	DECEASED	Human brain tumor tissue from Glioma patient	Male
GSM1061690	m6AclusterB	GSE43378	<60	2134	LIVING	Human brain tumor tissue from Glioma patient	Male
GSM1061691	m6AclusterA	GSE43378	>=60	432	DECEASED	Human brain tumor tissue from Glioma patient	Male
GSM1061692	m6AclusterA	GSE43378	>=60	653	DECEASED	Human brain tumor tissue from Glioma patient	Male
GSM1061693	m6AclusterB	GSE43378	<60	1737	DECEASED	Human brain tumor tissue from Glioma patient	Male
GSM1061694	m6AclusterB	GSE43378	<60	358	DECEASED	Human brain tumor tissue from Glioma patient	Male
GSM1061695	m6AclusterA	GSE43378	>=60	565	DECEASED	Human brain tumor tissue from Glioma patient	Female
GSM1061696	m6AclusterA	GSE43378	<60	20	DECEASED	Human brain tumor tissue from Glioma patient	Female
GSM1061697	m6AclusterB	GSE43378	<60	1519	LIVING	Human brain tumor tissue from Glioma patient	Female
GSM1061698	m6AclusterB	GSE43378	<60	1427	LIVING	Human brain tumor tissue from Glioma patient	Male
GSM1061699	m6AclusterB	GSE43378	<60	33	DECEASED	Human brain tumor tissue from Glioma patient	Female
GSM1061700	m6AclusterA	GSE43378	<60	900	DECEASED	Human brain tumor tissue from Glioma patient	Female
GSM1061701	m6AclusterA	GSE43378	<60	1356	LIVING	Human brain tumor tissue from Glioma patient	Female
GSM1061702	m6AclusterB	GSE43378	>=60	323	DECEASED	Human brain tumor tissue from Glioma patient	Female
GSM1061703	m6AclusterA	GSE43378	>=60	811	DECEASED	Human brain tumor tissue from Glioma patient	Male
GSM1061704	m6AclusterA	GSE43378	<60	827	DECEASED	Human brain tumor tissue from Glioma patient	Male
GSM1061705	m6AclusterB	GSE43378	>=60	474	DECEASED	Human brain tumor tissue from Glioma patient	Male
GSM1061706	m6AclusterA	GSE43378	<60	1768	LIVING	Human brain tumor tissue from Glioma patient	Male
GSM1061707	m6AclusterB	GSE43378	<60	1710	LIVING	Human brain tumor tissue from Glioma patient	Male
GSM1061708	m6AclusterA	GSE43378	<60	587	DECEASED	Human brain tumor tissue from Glioma patient	Male
GSM1061709	m6AclusterB	GSE43378	>=60	308	DECEASED	Human brain tumor tissue from Glioma patient	Male
GSM1061710	m6AclusterB	GSE43378	>=60	144	DECEASED	Human brain tumor tissue from Glioma patient	Female
