# Supplementary material for: Integrating machine learning and bioinformatics analysis to m6A regulator-mediated methylation modification models for predicting glioblastoma patients’ prognosis and immunotherapy response
Source: Aging (Albany NY). 2023 May 23;15(10):4051–70. doi: 10.18632/aging.204495 (PMC10257999; doi:10.18632/aging.204495)
Supplement: Supplementary Table 13 [file aging-15-204495-s016.xls]

## Sheet: SupplementaryTable13_m6Ageneclu
Supplementary Table 13. m6Agenecluster.
sample	cluster
TCGA-06-5858-01	m6A.gene.clusterA
TCGA-06-0221-02	m6A.gene.clusterA
TCGA-19-0957-02	m6A.gene.clusterA
TCGA-19-4065-01	m6A.gene.clusterB
TCGA-19-4065-02	m6A.gene.clusterB
TCGA-14-1402-02	m6A.gene.clusterB
TCGA-06-0211-02	m6A.gene.clusterB
TCGA-06-0210-02	m6A.gene.clusterB
TCGA-06-0190-02	m6A.gene.clusterB
TCGA-19-5960-01	m6A.gene.clusterA
TCGA-14-0736-02	m6A.gene.clusterB
TCGA-19-1389-02	m6A.gene.clusterB
TCGA-06-0125-02	m6A.gene.clusterB
TCGA-06-0152-02	m6A.gene.clusterA
TCGA-06-0171-02	m6A.gene.clusterB
CGGA_1001	m6A.gene.clusterB
CGGA_1007	m6A.gene.clusterA
CGGA_1011	m6A.gene.clusterB
CGGA_1015	m6A.gene.clusterB
CGGA_1019	m6A.gene.clusterB
CGGA_1023	m6A.gene.clusterA
CGGA_1024	m6A.gene.clusterA
CGGA_1026	m6A.gene.clusterA
CGGA_1035	m6A.gene.clusterB
CGGA_1039	m6A.gene.clusterA
CGGA_1045	m6A.gene.clusterB
CGGA_1049	m6A.gene.clusterB
CGGA_1072	m6A.gene.clusterA
CGGA_1077	m6A.gene.clusterB
CGGA_1078	m6A.gene.clusterB
CGGA_1083	m6A.gene.clusterB
CGGA_1091	m6A.gene.clusterA
CGGA_1109	m6A.gene.clusterA
CGGA_1124	m6A.gene.clusterB
CGGA_1139	m6A.gene.clusterB
CGGA_1171	m6A.gene.clusterB
CGGA_1177	m6A.gene.clusterB
CGGA_1180	m6A.gene.clusterB
CGGA_1188	m6A.gene.clusterB
CGGA_1214	m6A.gene.clusterA
CGGA_1216	m6A.gene.clusterB
CGGA_1218	m6A.gene.clusterB
CGGA_1224	m6A.gene.clusterB
CGGA_1234	m6A.gene.clusterB
CGGA_1237	m6A.gene.clusterA
CGGA_1240	m6A.gene.clusterB
CGGA_1251	m6A.gene.clusterA
CGGA_1258	m6A.gene.clusterB
CGGA_1270	m6A.gene.clusterB
CGGA_1271	m6A.gene.clusterA
CGGA_1272	m6A.gene.clusterA
CGGA_1283	m6A.gene.clusterA
CGGA_1285	m6A.gene.clusterB
CGGA_1299	m6A.gene.clusterA
CGGA_1301	m6A.gene.clusterB
CGGA_1313	m6A.gene.clusterB
CGGA_1320	m6A.gene.clusterA
CGGA_1332	m6A.gene.clusterA
CGGA_1338	m6A.gene.clusterB
CGGA_1342	m6A.gene.clusterB
CGGA_1343	m6A.gene.clusterA
CGGA_1346	m6A.gene.clusterB
CGGA_1370	m6A.gene.clusterA
CGGA_1393	m6A.gene.clusterB
CGGA_272	m6A.gene.clusterA
CGGA_274	m6A.gene.clusterA
CGGA_318	m6A.gene.clusterB
CGGA_413	m6A.gene.clusterB
CGGA_483	m6A.gene.clusterA
CGGA_494	m6A.gene.clusterB
CGGA_499	m6A.gene.clusterA
CGGA_525	m6A.gene.clusterB
CGGA_604	m6A.gene.clusterB
CGGA_624	m6A.gene.clusterB
CGGA_658	m6A.gene.clusterA
CGGA_669	m6A.gene.clusterA
CGGA_676	m6A.gene.clusterA
CGGA_679	m6A.gene.clusterB
CGGA_680	m6A.gene.clusterA
CGGA_700	m6A.gene.clusterA
CGGA_731	m6A.gene.clusterB
CGGA_773	m6A.gene.clusterB
CGGA_782	m6A.gene.clusterB
CGGA_789	m6A.gene.clusterB
CGGA_802	m6A.gene.clusterB
CGGA_804	m6A.gene.clusterB
CGGA_808	m6A.gene.clusterB
CGGA_837	m6A.gene.clusterA
CGGA_842	m6A.gene.clusterB
CGGA_848	m6A.gene.clusterB
CGGA_850	m6A.gene.clusterA
CGGA_859	m6A.gene.clusterB
CGGA_876	m6A.gene.clusterB
CGGA_878	m6A.gene.clusterA
CGGA_902	m6A.gene.clusterA
CGGA_D02	m6A.gene.clusterB
CGGA_D03	m6A.gene.clusterA
CGGA_D09	m6A.gene.clusterA
CGGA_D26	m6A.gene.clusterB
CGGA_D32	m6A.gene.clusterA
CGGA_D35	m6A.gene.clusterB
CGGA_D36	m6A.gene.clusterB
CGGA_D37	m6A.gene.clusterB
CGGA_D51	m6A.gene.clusterB
CGGA_D57	m6A.gene.clusterB
CGGA_342	m6A.gene.clusterB
CGGA_719	m6A.gene.clusterA
CGGA_1060	m6A.gene.clusterA
CGGA_1068	m6A.gene.clusterA
CGGA_1105	m6A.gene.clusterB
CGGA_1129	m6A.gene.clusterA
CGGA_1136	m6A.gene.clusterB
CGGA_1170	m6A.gene.clusterA
CGGA_1175	m6A.gene.clusterA
CGGA_1219	m6A.gene.clusterA
CGGA_1227	m6A.gene.clusterA
CGGA_1287	m6A.gene.clusterA
CGGA_1314	m6A.gene.clusterA
CGGA_1324	m6A.gene.clusterB
CGGA_1375	m6A.gene.clusterA
CGGA_1381	m6A.gene.clusterA
CGGA_1384	m6A.gene.clusterA
CGGA_1394	m6A.gene.clusterA
CGGA_1409	m6A.gene.clusterA
CGGA_1412	m6A.gene.clusterB
CGGA_374	m6A.gene.clusterA
CGGA_491	m6A.gene.clusterA
CGGA_545	m6A.gene.clusterB
CGGA_710	m6A.gene.clusterB
CGGA_747	m6A.gene.clusterA
CGGA_761	m6A.gene.clusterA
CGGA_822	m6A.gene.clusterA
CGGA_899	m6A.gene.clusterA
CGGA_D34	m6A.gene.clusterA
CGGA_D38	m6A.gene.clusterA
CGGA_D59	m6A.gene.clusterA
CGGA_518	m6A.gene.clusterA
CGGA_J100	m6A.gene.clusterA
CGGA_1008	m6A.gene.clusterA
CGGA_1053	m6A.gene.clusterA
CGGA_1070	m6A.gene.clusterA
CGGA_1073	m6A.gene.clusterB
CGGA_1074	m6A.gene.clusterB
CGGA_1099	m6A.gene.clusterB
CGGA_1114	m6A.gene.clusterB
CGGA_1116	m6A.gene.clusterA
CGGA_1119	m6A.gene.clusterA
CGGA_1197	m6A.gene.clusterA
CGGA_1275	m6A.gene.clusterB
CGGA_1450	m6A.gene.clusterA
CGGA_1460	m6A.gene.clusterA
CGGA_1475	m6A.gene.clusterA
CGGA_759	m6A.gene.clusterA
CGGA_D30	m6A.gene.clusterB
CGGA_1017	m6A.gene.clusterA
CGGA_1036	m6A.gene.clusterB
CGGA_1041	m6A.gene.clusterA
CGGA_1075	m6A.gene.clusterB
CGGA_1086	m6A.gene.clusterA
CGGA_1103	m6A.gene.clusterA
CGGA_1106	m6A.gene.clusterB
CGGA_1130	m6A.gene.clusterB
CGGA_1134	m6A.gene.clusterB
CGGA_1135	m6A.gene.clusterB
CGGA_1138	m6A.gene.clusterA
CGGA_1142	m6A.gene.clusterA
CGGA_1164	m6A.gene.clusterA
CGGA_1172	m6A.gene.clusterB
CGGA_120	m6A.gene.clusterA
CGGA_1208	m6A.gene.clusterB
CGGA_1236	m6A.gene.clusterB
CGGA_1248	m6A.gene.clusterB
CGGA_1255	m6A.gene.clusterB
CGGA_1256	m6A.gene.clusterB
CGGA_1257	m6A.gene.clusterB
CGGA_1260	m6A.gene.clusterB
CGGA_1262	m6A.gene.clusterB
CGGA_1282	m6A.gene.clusterA
CGGA_1325	m6A.gene.clusterA
CGGA_1326	m6A.gene.clusterB
CGGA_1337	m6A.gene.clusterB
CGGA_1353	m6A.gene.clusterA
CGGA_1354	m6A.gene.clusterA
CGGA_1365	m6A.gene.clusterA
CGGA_1371	m6A.gene.clusterB
CGGA_1378	m6A.gene.clusterA
CGGA_1380	m6A.gene.clusterB
CGGA_1382	m6A.gene.clusterA
CGGA_1387	m6A.gene.clusterA
CGGA_139	m6A.gene.clusterA
CGGA_1391	m6A.gene.clusterB
CGGA_1392	m6A.gene.clusterB
CGGA_1402	m6A.gene.clusterB
CGGA_1403	m6A.gene.clusterA
CGGA_1410	m6A.gene.clusterA
CGGA_1415	m6A.gene.clusterB
CGGA_1418	m6A.gene.clusterA
CGGA_1419	m6A.gene.clusterB
CGGA_1420	m6A.gene.clusterB
CGGA_1422	m6A.gene.clusterA
CGGA_1425	m6A.gene.clusterA
CGGA_1426	m6A.gene.clusterA
CGGA_1429	m6A.gene.clusterA
CGGA_1430	m6A.gene.clusterA
CGGA_1433	m6A.gene.clusterB
CGGA_1441	m6A.gene.clusterB
CGGA_1444	m6A.gene.clusterA
CGGA_1451	m6A.gene.clusterB
CGGA_1452	m6A.gene.clusterB
CGGA_1457	m6A.gene.clusterB
CGGA_1461	m6A.gene.clusterA
CGGA_1462	m6A.gene.clusterB
CGGA_1467	m6A.gene.clusterA
CGGA_1472	m6A.gene.clusterB
CGGA_1476	m6A.gene.clusterB
CGGA_1478	m6A.gene.clusterA
CGGA_1480	m6A.gene.clusterB
CGGA_1481	m6A.gene.clusterA
CGGA_1486	m6A.gene.clusterA
CGGA_1491	m6A.gene.clusterA
CGGA_1492	m6A.gene.clusterB
CGGA_1494	m6A.gene.clusterA
CGGA_1496	m6A.gene.clusterA
CGGA_1498	m6A.gene.clusterB
CGGA_1500	m6A.gene.clusterB
CGGA_1501	m6A.gene.clusterB
CGGA_1503	m6A.gene.clusterB
CGGA_1505	m6A.gene.clusterA
CGGA_1507	m6A.gene.clusterB
CGGA_1520	m6A.gene.clusterB
CGGA_1521	m6A.gene.clusterA
CGGA_1529	m6A.gene.clusterA
CGGA_1534	m6A.gene.clusterB
CGGA_1535	m6A.gene.clusterB
CGGA_1537	m6A.gene.clusterB
CGGA_1538	m6A.gene.clusterB
CGGA_1539	m6A.gene.clusterA
CGGA_1541	m6A.gene.clusterB
CGGA_1542	m6A.gene.clusterA
CGGA_1543	m6A.gene.clusterB
CGGA_1546	m6A.gene.clusterB
CGGA_1548	m6A.gene.clusterB
CGGA_1551	m6A.gene.clusterB
CGGA_1558	m6A.gene.clusterB
CGGA_1559	m6A.gene.clusterA
CGGA_1560	m6A.gene.clusterA
CGGA_1564	m6A.gene.clusterA
CGGA_1571	m6A.gene.clusterB
CGGA_1572	m6A.gene.clusterB
CGGA_1586	m6A.gene.clusterB
CGGA_1595	m6A.gene.clusterA
CGGA_1596	m6A.gene.clusterA
CGGA_1597	m6A.gene.clusterB
CGGA_1601	m6A.gene.clusterB
CGGA_1603	m6A.gene.clusterB
CGGA_1604	m6A.gene.clusterA
CGGA_1605	m6A.gene.clusterB
CGGA_1611	m6A.gene.clusterA
CGGA_1612	m6A.gene.clusterB
CGGA_1613	m6A.gene.clusterB
CGGA_1615	m6A.gene.clusterB
CGGA_1624	m6A.gene.clusterA
CGGA_1626	m6A.gene.clusterB
CGGA_1631	m6A.gene.clusterB
CGGA_1634	m6A.gene.clusterB
CGGA_1635	m6A.gene.clusterA
CGGA_1641	m6A.gene.clusterA
CGGA_1643	m6A.gene.clusterA
CGGA_1644	m6A.gene.clusterB
CGGA_1650	m6A.gene.clusterA
CGGA_1654	m6A.gene.clusterB
CGGA_1656	m6A.gene.clusterA
CGGA_1658	m6A.gene.clusterB
CGGA_1659	m6A.gene.clusterB
CGGA_1663	m6A.gene.clusterB
CGGA_1666	m6A.gene.clusterA
CGGA_1678	m6A.gene.clusterA
CGGA_1681	m6A.gene.clusterB
CGGA_1682	m6A.gene.clusterB
CGGA_1684	m6A.gene.clusterB
CGGA_1687	m6A.gene.clusterB
CGGA_1690	m6A.gene.clusterB
CGGA_1694	m6A.gene.clusterB
CGGA_1697	m6A.gene.clusterB
CGGA_1698	m6A.gene.clusterB
CGGA_1699	m6A.gene.clusterA
CGGA_1702	m6A.gene.clusterA
CGGA_1706	m6A.gene.clusterB
CGGA_1708	m6A.gene.clusterB
CGGA_1709	m6A.gene.clusterA
CGGA_1713	m6A.gene.clusterA
CGGA_1722	m6A.gene.clusterA
CGGA_1727	m6A.gene.clusterB
CGGA_1728	m6A.gene.clusterA
CGGA_1729	m6A.gene.clusterB
CGGA_1735	m6A.gene.clusterA
CGGA_1736	m6A.gene.clusterB
CGGA_1740	m6A.gene.clusterA
CGGA_1744	m6A.gene.clusterB
CGGA_1749	m6A.gene.clusterA
CGGA_1750	m6A.gene.clusterB
CGGA_1758	m6A.gene.clusterA
CGGA_1764	m6A.gene.clusterA
CGGA_1767	m6A.gene.clusterA
CGGA_1769	m6A.gene.clusterA
CGGA_1770	m6A.gene.clusterA
CGGA_1773	m6A.gene.clusterA
CGGA_1776	m6A.gene.clusterA
CGGA_1780	m6A.gene.clusterA
CGGA_1785	m6A.gene.clusterA
CGGA_1807	m6A.gene.clusterA
CGGA_1811	m6A.gene.clusterB
CGGA_1812	m6A.gene.clusterB
CGGA_1814	m6A.gene.clusterB
CGGA_1815	m6A.gene.clusterB
CGGA_1817	m6A.gene.clusterB
CGGA_1819	m6A.gene.clusterA
CGGA_1820	m6A.gene.clusterA
CGGA_1826	m6A.gene.clusterA
CGGA_1833	m6A.gene.clusterA
CGGA_1840	m6A.gene.clusterA
CGGA_1857	m6A.gene.clusterB
CGGA_1865	m6A.gene.clusterB
CGGA_1866	m6A.gene.clusterA
CGGA_1870	m6A.gene.clusterA
CGGA_1886	m6A.gene.clusterA
CGGA_1899	m6A.gene.clusterB
CGGA_1901	m6A.gene.clusterB
CGGA_1908	m6A.gene.clusterA
CGGA_1911	m6A.gene.clusterA
CGGA_1912	m6A.gene.clusterB
CGGA_1916	m6A.gene.clusterA
CGGA_1946	m6A.gene.clusterB
CGGA_1953	m6A.gene.clusterB
CGGA_1955	m6A.gene.clusterB
CGGA_1972	m6A.gene.clusterB
CGGA_1976	m6A.gene.clusterB
CGGA_1985	m6A.gene.clusterA
CGGA_2003	m6A.gene.clusterB
CGGA_2008	m6A.gene.clusterB
CGGA_2024	m6A.gene.clusterB
CGGA_2038	m6A.gene.clusterA
CGGA_2039	m6A.gene.clusterB
CGGA_2047	m6A.gene.clusterB
CGGA_2053	m6A.gene.clusterB
CGGA_2056	m6A.gene.clusterB
CGGA_2062	m6A.gene.clusterB
CGGA_2075	m6A.gene.clusterB
CGGA_2078	m6A.gene.clusterB
CGGA_2082	m6A.gene.clusterB
CGGA_2088	m6A.gene.clusterB
CGGA_2106	m6A.gene.clusterA
CGGA_2115	m6A.gene.clusterA
CGGA_487	m6A.gene.clusterA
CGGA_509	m6A.gene.clusterA
CGGA_530	m6A.gene.clusterA
CGGA_568	m6A.gene.clusterB
CGGA_777	m6A.gene.clusterB
CGGA_831	m6A.gene.clusterB
CGGA_869	m6A.gene.clusterB
CGGA_D53	m6A.gene.clusterA
CGGA_P100	m6A.gene.clusterA
CGGA_P102	m6A.gene.clusterA
CGGA_P106	m6A.gene.clusterA
CGGA_P109	m6A.gene.clusterA
CGGA_P112	m6A.gene.clusterB
CGGA_P116	m6A.gene.clusterA
CGGA_P136	m6A.gene.clusterA
CGGA_P143	m6A.gene.clusterB
CGGA_P15	m6A.gene.clusterB
CGGA_P154	m6A.gene.clusterA
CGGA_P16	m6A.gene.clusterA
CGGA_P160	m6A.gene.clusterB
CGGA_P164	m6A.gene.clusterA
CGGA_P175	m6A.gene.clusterA
CGGA_P178	m6A.gene.clusterA
CGGA_P180	m6A.gene.clusterA
CGGA_P182	m6A.gene.clusterB
CGGA_P199	m6A.gene.clusterA
CGGA_P205	m6A.gene.clusterA
CGGA_P22	m6A.gene.clusterA
CGGA_P25	m6A.gene.clusterB
CGGA_P28	m6A.gene.clusterA
CGGA_P280	m6A.gene.clusterB
CGGA_P283	m6A.gene.clusterA
CGGA_P295	m6A.gene.clusterB
CGGA_P335	m6A.gene.clusterB
CGGA_P385	m6A.gene.clusterB
CGGA_P401	m6A.gene.clusterA
CGGA_P411	m6A.gene.clusterA
CGGA_P415	m6A.gene.clusterB
CGGA_P499	m6A.gene.clusterB
CGGA_P512	m6A.gene.clusterA
CGGA_P585	m6A.gene.clusterB
CGGA_P596	m6A.gene.clusterA
CGGA_P609	m6A.gene.clusterA
CGGA_P610	m6A.gene.clusterB
CGGA_P619	m6A.gene.clusterB
CGGA_P625	m6A.gene.clusterA
CGGA_P7	m6A.gene.clusterB
CGGA_P87	m6A.gene.clusterB
CGGA_P89	m6A.gene.clusterB
CGGA_P99	m6A.gene.clusterA
TCGA-02-0099-01	m6A.gene.clusterB
TCGA-06-0150-01	m6A.gene.clusterB
TCGA-06-0142-01	m6A.gene.clusterB
TCGA-06-0178-01	m6A.gene.clusterA
TCGA-02-0011-01	m6A.gene.clusterA
TCGA-06-0125-01	m6A.gene.clusterA
TCGA-06-0141-01	m6A.gene.clusterB
TCGA-06-0132-01	m6A.gene.clusterB
TCGA-06-0174-01	m6A.gene.clusterA
TCGA-02-0064-01	m6A.gene.clusterB
TCGA-06-0171-01	m6A.gene.clusterB
TCGA-06-0211-01	m6A.gene.clusterA
TCGA-06-0122-01	m6A.gene.clusterB
TCGA-02-0014-01	m6A.gene.clusterA
TCGA-02-0052-01	m6A.gene.clusterB
TCGA-06-0219-01	m6A.gene.clusterB
TCGA-06-0157-01	m6A.gene.clusterA
TCGA-02-0114-01	m6A.gene.clusterA
TCGA-06-0145-01	m6A.gene.clusterA
TCGA-06-0124-01	m6A.gene.clusterB
TCGA-02-0038-01	m6A.gene.clusterB
TCGA-06-0201-01	m6A.gene.clusterA
TCGA-02-0116-01	m6A.gene.clusterA
TCGA-02-0021-01	m6A.gene.clusterA
TCGA-06-0154-01	m6A.gene.clusterB
TCGA-02-0010-01	m6A.gene.clusterA
TCGA-06-0195-01	m6A.gene.clusterA
TCGA-02-0057-01	m6A.gene.clusterB
TCGA-06-0190-01	m6A.gene.clusterB
TCGA-06-0173-01	m6A.gene.clusterA
TCGA-06-0158-01	m6A.gene.clusterA
TCGA-02-0069-01	m6A.gene.clusterA
TCGA-02-0115-01	m6A.gene.clusterB
TCGA-06-0208-01	m6A.gene.clusterA
TCGA-06-0126-01	m6A.gene.clusterA
TCGA-02-0006-01	m6A.gene.clusterB
TCGA-02-0089-01	m6A.gene.clusterB
TCGA-06-0188-01	m6A.gene.clusterA
TCGA-02-0107-01	m6A.gene.clusterB
TCGA-06-0128-01	m6A.gene.clusterA
TCGA-02-0060-01	m6A.gene.clusterA
TCGA-02-0001-01	m6A.gene.clusterB
TCGA-06-0197-01	m6A.gene.clusterB
TCGA-06-0237-01	m6A.gene.clusterA
TCGA-02-0058-01	m6A.gene.clusterA
TCGA-06-0165-01	m6A.gene.clusterB
TCGA-06-0137-01	m6A.gene.clusterA
TCGA-06-0159-01	m6A.gene.clusterB
TCGA-02-0055-01	m6A.gene.clusterB
TCGA-06-0206-01	m6A.gene.clusterB
TCGA-06-0184-01	m6A.gene.clusterB
TCGA-06-0209-01	m6A.gene.clusterB
TCGA-06-0187-01	m6A.gene.clusterB
TCGA-06-0221-01	m6A.gene.clusterA
TCGA-02-0007-01	m6A.gene.clusterA
TCGA-06-0156-01	m6A.gene.clusterB
TCGA-06-0169-01	m6A.gene.clusterB
TCGA-06-0138-01	m6A.gene.clusterB
TCGA-06-0139-01	m6A.gene.clusterB
TCGA-02-0043-01	m6A.gene.clusterA
TCGA-02-0028-01	m6A.gene.clusterA
TCGA-06-0185-01	m6A.gene.clusterA
TCGA-02-0054-01	m6A.gene.clusterA
TCGA-06-0214-01	m6A.gene.clusterA
TCGA-06-0151-01	m6A.gene.clusterB
TCGA-02-0003-01	m6A.gene.clusterA
TCGA-06-0130-01	m6A.gene.clusterB
TCGA-02-0024-01	m6A.gene.clusterA
TCGA-06-0166-01	m6A.gene.clusterA
TCGA-06-0189-01	m6A.gene.clusterB
TCGA-06-0168-01	m6A.gene.clusterB
TCGA-02-0086-01	m6A.gene.clusterB
TCGA-06-0240-01	m6A.gene.clusterB
TCGA-02-0033-01	m6A.gene.clusterB
TCGA-02-0075-01	m6A.gene.clusterB
TCGA-02-0034-01	m6A.gene.clusterB
TCGA-02-0037-01	m6A.gene.clusterA
TCGA-02-0085-01	m6A.gene.clusterB
TCGA-02-0083-01	m6A.gene.clusterA
TCGA-06-0140-01	m6A.gene.clusterB
TCGA-06-0176-01	m6A.gene.clusterB
TCGA-02-0046-01	m6A.gene.clusterA
TCGA-06-0210-01	m6A.gene.clusterB
TCGA-06-0143-01	m6A.gene.clusterB
TCGA-06-0241-01	m6A.gene.clusterA
TCGA-06-0160-01	m6A.gene.clusterA
TCGA-02-0071-01	m6A.gene.clusterB
TCGA-02-0047-01	m6A.gene.clusterA
TCGA-06-0129-01	m6A.gene.clusterA
TCGA-02-0113-01	m6A.gene.clusterA
TCGA-02-0080-01	m6A.gene.clusterA
TCGA-02-0102-01	m6A.gene.clusterA
TCGA-06-0147-01	m6A.gene.clusterB
TCGA-02-0074-01	m6A.gene.clusterA
TCGA-06-0148-01	m6A.gene.clusterA
TCGA-06-0213-01	m6A.gene.clusterB
TCGA-02-0027-01	m6A.gene.clusterA
TCGA-06-0133-01	m6A.gene.clusterB
TCGA-02-0009-01	m6A.gene.clusterA
TCGA-06-2567-01	m6A.gene.clusterB
TCGA-12-0703-01	m6A.gene.clusterA
TCGA-14-1821-01	m6A.gene.clusterA
TCGA-08-0373-01	m6A.gene.clusterB
TCGA-26-1438-01	m6A.gene.clusterB
TCGA-14-1402-01	m6A.gene.clusterB
TCGA-16-1045-01	m6A.gene.clusterB
TCGA-19-1388-01	m6A.gene.clusterA
TCGA-19-0963-01	m6A.gene.clusterB
TCGA-14-0736-01	m6A.gene.clusterB
TCGA-19-1387-01	m6A.gene.clusterB
TCGA-14-1452-01	m6A.gene.clusterB
TCGA-14-1823-01	m6A.gene.clusterB
TCGA-06-0749-01	m6A.gene.clusterB
TCGA-06-1086-01	m6A.gene.clusterA
TCGA-12-0618-01	m6A.gene.clusterA
TCGA-08-0525-01	m6A.gene.clusterB
TCGA-12-1598-01	m6A.gene.clusterA
TCGA-12-0692-01	m6A.gene.clusterA
TCGA-02-0422-01	m6A.gene.clusterA
TCGA-06-2564-01	m6A.gene.clusterA
TCGA-02-0004-01	m6A.gene.clusterB
TCGA-08-0392-01	m6A.gene.clusterB
TCGA-06-0179-01	m6A.gene.clusterB
TCGA-06-1801-01	m6A.gene.clusterA
TCGA-14-0871-01	m6A.gene.clusterA
TCGA-12-3649-01	m6A.gene.clusterA
TCGA-28-1749-01	m6A.gene.clusterA
TCGA-08-0358-01	m6A.gene.clusterA
TCGA-28-1746-01	m6A.gene.clusterA
TCGA-14-0787-01	m6A.gene.clusterA
TCGA-28-1757-01	m6A.gene.clusterB
TCGA-06-0162-01	m6A.gene.clusterB
TCGA-12-1092-01	m6A.gene.clusterB
TCGA-12-1094-01	m6A.gene.clusterB
TCGA-28-1747-01	m6A.gene.clusterA
TCGA-08-0345-01	m6A.gene.clusterB
TCGA-02-0260-01	m6A.gene.clusterA
TCGA-27-2519-01	m6A.gene.clusterB
TCGA-06-0412-01	m6A.gene.clusterB
TCGA-27-1835-01	m6A.gene.clusterA
TCGA-02-0440-01	m6A.gene.clusterA
TCGA-27-2521-01	m6A.gene.clusterA
TCGA-12-1599-01	m6A.gene.clusterB
TCGA-06-1087-01	m6A.gene.clusterA
TCGA-06-0397-01	m6A.gene.clusterB
TCGA-08-0356-01	m6A.gene.clusterB
TCGA-06-0152-01	m6A.gene.clusterB
TCGA-06-0645-01	m6A.gene.clusterB
TCGA-19-2624-01	m6A.gene.clusterA
TCGA-19-0957-01	m6A.gene.clusterB
TCGA-12-0776-01	m6A.gene.clusterB
TCGA-15-1449-01	m6A.gene.clusterA
TCGA-28-1751-01	m6A.gene.clusterB
TCGA-12-3651-01	m6A.gene.clusterB
TCGA-12-3650-01	m6A.gene.clusterA
TCGA-19-0955-01	m6A.gene.clusterB
TCGA-06-0409-01	m6A.gene.clusterB
TCGA-19-1787-01	m6A.gene.clusterA
TCGA-15-1446-01	m6A.gene.clusterA
TCGA-14-1453-01	m6A.gene.clusterA
TCGA-19-2620-01	m6A.gene.clusterB
TCGA-06-0649-01	m6A.gene.clusterB
TCGA-12-1597-01	m6A.gene.clusterA
TCGA-02-0337-01	m6A.gene.clusterB
TCGA-02-0285-01	m6A.gene.clusterB
TCGA-27-2527-01	m6A.gene.clusterB
TCGA-02-0332-01	m6A.gene.clusterB
TCGA-14-0865-01	m6A.gene.clusterA
TCGA-12-1088-01	m6A.gene.clusterB
TCGA-12-3646-01	m6A.gene.clusterA
TCGA-27-1836-01	m6A.gene.clusterA
TCGA-08-0524-01	m6A.gene.clusterA
TCGA-08-0244-01	m6A.gene.clusterB
TCGA-12-0691-01	m6A.gene.clusterA
TCGA-14-0790-01	m6A.gene.clusterA
TCGA-32-2616-01	m6A.gene.clusterA
TCGA-41-2573-01	m6A.gene.clusterA
TCGA-14-3477-01	m6A.gene.clusterA
TCGA-12-1095-01	m6A.gene.clusterB
TCGA-08-0517-01	m6A.gene.clusterA
TCGA-19-2621-01	m6A.gene.clusterA
TCGA-14-0812-01	m6A.gene.clusterB
TCGA-14-1458-01	m6A.gene.clusterA
TCGA-08-0360-01	m6A.gene.clusterB
TCGA-02-0451-01	m6A.gene.clusterB
TCGA-02-2470-01	m6A.gene.clusterB
TCGA-02-0317-01	m6A.gene.clusterA
TCGA-08-0510-01	m6A.gene.clusterB
TCGA-02-0048-01	m6A.gene.clusterA
TCGA-14-0817-01	m6A.gene.clusterB
TCGA-19-2619-01	m6A.gene.clusterA
TCGA-28-1753-01	m6A.gene.clusterB
TCGA-08-0349-01	m6A.gene.clusterB
TCGA-06-0402-01	m6A.gene.clusterA
TCGA-32-1982-01	m6A.gene.clusterB
TCGA-12-0615-01	m6A.gene.clusterB
TCGA-06-0875-01	m6A.gene.clusterA
TCGA-12-0656-01	m6A.gene.clusterB
TCGA-08-0516-01	m6A.gene.clusterA
TCGA-08-0390-01	m6A.gene.clusterB
TCGA-14-1454-01	m6A.gene.clusterA
TCGA-12-0820-01	m6A.gene.clusterA
TCGA-02-0111-01	m6A.gene.clusterB
TCGA-06-0745-01	m6A.gene.clusterA
TCGA-02-0333-01	m6A.gene.clusterA
TCGA-14-1827-01	m6A.gene.clusterB
TCGA-06-2570-01	m6A.gene.clusterA
TCGA-14-1825-01	m6A.gene.clusterA
TCGA-12-0616-01	m6A.gene.clusterA
TCGA-02-0432-01	m6A.gene.clusterA
TCGA-02-0290-01	m6A.gene.clusterB
TCGA-15-1447-01	m6A.gene.clusterA
TCGA-12-0818-01	m6A.gene.clusterA
TCGA-27-1832-01	m6A.gene.clusterB
TCGA-12-0775-01	m6A.gene.clusterB
TCGA-08-0380-01	m6A.gene.clusterB
TCGA-06-0876-01	m6A.gene.clusterB
TCGA-19-1385-01	m6A.gene.clusterB
TCGA-02-0023-01	m6A.gene.clusterB
TCGA-06-0182-01	m6A.gene.clusterA
TCGA-19-1788-01	m6A.gene.clusterA
TCGA-06-0750-01	m6A.gene.clusterB
TCGA-28-2506-01	m6A.gene.clusterB
TCGA-12-0828-01	m6A.gene.clusterB
TCGA-06-0747-01	m6A.gene.clusterA
TCGA-02-0456-01	m6A.gene.clusterB
TCGA-12-0821-01	m6A.gene.clusterA
TCGA-08-0347-01	m6A.gene.clusterA
TCGA-16-1055-01	m6A.gene.clusterB
TCGA-02-0015-01	m6A.gene.clusterA
TCGA-08-0359-01	m6A.gene.clusterB
TCGA-02-2486-01	m6A.gene.clusterB
TCGA-12-0819-01	m6A.gene.clusterA
TCGA-06-1802-01	m6A.gene.clusterB
TCGA-16-1063-01	m6A.gene.clusterA
TCGA-27-1830-01	m6A.gene.clusterB
TCGA-08-0512-01	m6A.gene.clusterB
TCGA-06-0413-01	m6A.gene.clusterA
TCGA-06-0744-01	m6A.gene.clusterA
TCGA-14-2555-01	m6A.gene.clusterB
TCGA-19-0960-01	m6A.gene.clusterA
TCGA-06-2559-01	m6A.gene.clusterA
TCGA-08-0350-01	m6A.gene.clusterA
TCGA-02-0325-01	m6A.gene.clusterA
TCGA-19-2625-01	m6A.gene.clusterB
TCGA-02-0266-01	m6A.gene.clusterB
TCGA-27-1837-01	m6A.gene.clusterA
TCGA-12-0827-01	m6A.gene.clusterB
TCGA-12-1097-01	m6A.gene.clusterB
TCGA-02-0070-01	m6A.gene.clusterA
TCGA-06-2569-01	m6A.gene.clusterA
TCGA-28-1760-01	m6A.gene.clusterB
TCGA-06-1800-01	m6A.gene.clusterB
TCGA-12-1093-01	m6A.gene.clusterB
TCGA-12-1091-01	m6A.gene.clusterA
TCGA-28-1752-01	m6A.gene.clusterB
TCGA-16-1060-01	m6A.gene.clusterB
TCGA-14-0786-01	m6A.gene.clusterA
TCGA-27-2528-01	m6A.gene.clusterA
TCGA-27-1834-01	m6A.gene.clusterB
TCGA-06-2565-01	m6A.gene.clusterA
TCGA-12-1090-01	m6A.gene.clusterA
TCGA-02-0068-01	m6A.gene.clusterB
TCGA-32-2638-01	m6A.gene.clusterB
TCGA-27-1838-01	m6A.gene.clusterB
TCGA-02-0324-01	m6A.gene.clusterB
TCGA-14-1795-01	m6A.gene.clusterA
TCGA-02-0016-01	m6A.gene.clusterA
TCGA-28-1755-01	m6A.gene.clusterA
TCGA-27-2524-01	m6A.gene.clusterB
TCGA-02-0446-01	m6A.gene.clusterB
TCGA-02-0087-01	m6A.gene.clusterA
TCGA-14-1401-01	m6A.gene.clusterB
TCGA-12-3648-01	m6A.gene.clusterA
TCGA-08-0357-01	m6A.gene.clusterA
TCGA-12-3653-01	m6A.gene.clusterA
TCGA-14-0867-01	m6A.gene.clusterB
TCGA-06-2561-01	m6A.gene.clusterB
TCGA-08-0348-01	m6A.gene.clusterA
TCGA-02-0106-01	m6A.gene.clusterB
TCGA-12-0822-01	m6A.gene.clusterB
TCGA-14-1456-01	m6A.gene.clusterA
TCGA-12-0662-01	m6A.gene.clusterB
TCGA-14-1451-01	m6A.gene.clusterB
TCGA-06-0644-01	m6A.gene.clusterB
TCGA-02-0258-01	m6A.gene.clusterA
TCGA-06-0192-01	m6A.gene.clusterB
TCGA-12-1089-01	m6A.gene.clusterA
TCGA-27-1833-01	m6A.gene.clusterA
TCGA-12-0772-01	m6A.gene.clusterB
TCGA-08-0514-01	m6A.gene.clusterA
TCGA-06-0879-01	m6A.gene.clusterA
TCGA-12-1602-01	m6A.gene.clusterB
TCGA-08-0389-01	m6A.gene.clusterA
TCGA-06-1084-01	m6A.gene.clusterB
TCGA-06-2558-01	m6A.gene.clusterB
TCGA-02-0039-01	m6A.gene.clusterB
TCGA-19-1789-01	m6A.gene.clusterA
TCGA-32-2632-01	m6A.gene.clusterB
TCGA-02-0104-01	m6A.gene.clusterA
TCGA-26-1799-01	m6A.gene.clusterA
TCGA-02-0026-01	m6A.gene.clusterA
TCGA-32-2615-01	m6A.gene.clusterB
TCGA-28-2514-01	m6A.gene.clusterA
TCGA-06-0686-01	m6A.gene.clusterA
TCGA-12-0688-01	m6A.gene.clusterA
TCGA-02-0084-01	m6A.gene.clusterB
TCGA-08-0520-01	m6A.gene.clusterB
TCGA-12-0773-01	m6A.gene.clusterA
TCGA-02-0338-01	m6A.gene.clusterA
TCGA-02-2483-01	m6A.gene.clusterA
TCGA-27-2523-01	m6A.gene.clusterA
TCGA-06-0155-01	m6A.gene.clusterB
TCGA-12-0769-01	m6A.gene.clusterA
TCGA-32-1976-01	m6A.gene.clusterA
TCGA-19-1786-01	m6A.gene.clusterA
TCGA-02-0271-01	m6A.gene.clusterA
TCGA-06-0881-01	m6A.gene.clusterB
TCGA-06-0194-01	m6A.gene.clusterB
TCGA-02-0330-01	m6A.gene.clusterB
TCGA-12-0670-01	m6A.gene.clusterA
TCGA-06-0146-01	m6A.gene.clusterA
TCGA-14-1459-01	m6A.gene.clusterB
TCGA-06-0743-01	m6A.gene.clusterA
TCGA-12-0619-01	m6A.gene.clusterB
TCGA-28-2513-01	m6A.gene.clusterB
TCGA-27-1831-01	m6A.gene.clusterB
TCGA-14-2554-01	m6A.gene.clusterB
TCGA-12-0780-01	m6A.gene.clusterA
TCGA-06-0878-01	m6A.gene.clusterB
TCGA-08-0352-01	m6A.gene.clusterB
TCGA-12-1099-01	m6A.gene.clusterA
TCGA-06-0648-01	m6A.gene.clusterA
TCGA-02-0289-01	m6A.gene.clusterA
TCGA-19-1791-01	m6A.gene.clusterA
TCGA-14-1037-01	m6A.gene.clusterB
TCGA-14-0866-01	m6A.gene.clusterB
TCGA-08-0518-01	m6A.gene.clusterA
TCGA-14-1396-01	m6A.gene.clusterA
TCGA-06-0177-01	m6A.gene.clusterA
TCGA-06-2557-01	m6A.gene.clusterA
TCGA-02-0269-01	m6A.gene.clusterA
TCGA-08-0344-01	m6A.gene.clusterA
TCGA-27-2526-01	m6A.gene.clusterB
TCGA-08-0351-01	m6A.gene.clusterB
TCGA-02-0430-01	m6A.gene.clusterA
TCGA-12-1096-01	m6A.gene.clusterB
TCGA-14-1794-01	m6A.gene.clusterB
TCGA-06-0646-01	m6A.gene.clusterB
TCGA-19-2629-01	m6A.gene.clusterA
TCGA-28-2509-01	m6A.gene.clusterB
TCGA-02-2466-01	m6A.gene.clusterA
TCGA-12-0654-01	m6A.gene.clusterB
TCGA-12-1600-01	m6A.gene.clusterA
TCGA-02-0321-01	m6A.gene.clusterB
TCGA-14-1455-01	m6A.gene.clusterA
TCGA-16-0849-01	m6A.gene.clusterA
TCGA-32-1986-01	m6A.gene.clusterB
TCGA-12-0657-01	m6A.gene.clusterB
TCGA-28-1756-01	m6A.gene.clusterA
TCGA-16-1460-01	m6A.gene.clusterA
TCGA-08-0353-01	m6A.gene.clusterA
TCGA-14-1034-01	m6A.gene.clusterB
TCGA-14-0789-01	m6A.gene.clusterB
TCGA-27-2518-01	m6A.gene.clusterB
TCGA-02-0059-01	m6A.gene.clusterB
TCGA-06-0414-01	m6A.gene.clusterA
TCGA-14-0783-01	m6A.gene.clusterB
TCGA-02-2485-01	m6A.gene.clusterA
TCGA-14-1829-01	m6A.gene.clusterB
TCGA-08-0355-01	m6A.gene.clusterB
TCGA-14-0813-01	m6A.gene.clusterA
TCGA-06-0127-01	m6A.gene.clusterB
TCGA-15-0742-01	m6A.gene.clusterA
TCGA-12-0707-01	m6A.gene.clusterB
TCGA-06-0216-01	m6A.gene.clusterB
TCGA-08-0509-01	m6A.gene.clusterB
TCGA-08-0529-01	m6A.gene.clusterA
TCGA-12-0826-01	m6A.gene.clusterA
TCGA-02-0326-01	m6A.gene.clusterB
TCGA-02-0051-01	m6A.gene.clusterB
TCGA-19-0962-01	m6A.gene.clusterB
TCGA-19-0964-01	m6A.gene.clusterA
TCGA-16-1056-01	m6A.gene.clusterA
TCGA-19-2623-01	m6A.gene.clusterB
TCGA-41-2571-01	m6A.gene.clusterA
TCGA-02-0281-01	m6A.gene.clusterA
TCGA-19-1386-01	m6A.gene.clusterA
TCGA-08-0245-01	m6A.gene.clusterA
TCGA-08-0521-01	m6A.gene.clusterB
TCGA-08-0531-01	m6A.gene.clusterA
TCGA-06-0164-01	m6A.gene.clusterB
TCGA-06-0238-01	m6A.gene.clusterA
TCGA-08-0346-01	m6A.gene.clusterB
TCGA-28-1750-01	m6A.gene.clusterB
TCGA-06-0175-01	m6A.gene.clusterB
TCGA-26-1443-01	m6A.gene.clusterA
TCGA-06-0410-01	m6A.gene.clusterA
TCGA-02-0025-01	m6A.gene.clusterB
TCGA-26-1440-01	m6A.gene.clusterB
TCGA-32-1970-01	m6A.gene.clusterA
TCGA-08-0375-01	m6A.gene.clusterA
TCGA-16-0848-01	m6A.gene.clusterB
TCGA-19-1389-01	m6A.gene.clusterB
TCGA-06-2566-01	m6A.gene.clusterB
TCGA-12-0620-01	m6A.gene.clusterB
TCGA-28-2502-01	m6A.gene.clusterB
TCGA-06-0394-01	m6A.gene.clusterA
TCGA-08-0246-01	m6A.gene.clusterB
TCGA-19-1392-01	m6A.gene.clusterA
TCGA-06-0149-01	m6A.gene.clusterB
TCGA-08-0354-01	m6A.gene.clusterB
TCGA-02-0339-01	m6A.gene.clusterA
TCGA-06-2563-01	m6A.gene.clusterA
TCGA-02-0079-01	m6A.gene.clusterB
TCGA-32-2634-01	m6A.gene.clusterA
TCGA-16-1062-01	m6A.gene.clusterA
TCGA-16-0846-01	m6A.gene.clusterA
TCGA-12-1098-01	m6A.gene.clusterA
TCGA-12-0829-01	m6A.gene.clusterB
TCGA-06-2562-01	m6A.gene.clusterB
TCGA-12-3644-01	m6A.gene.clusterB
TCGA-16-1047-01	m6A.gene.clusterA
TCGA-19-1390-01	m6A.gene.clusterA
TCGA-06-1805-01	m6A.gene.clusterA
TCGA-08-0386-01	m6A.gene.clusterA
TCGA-41-2575-01	m6A.gene.clusterA
TCGA-12-0778-01	m6A.gene.clusterB
TCGA-12-3652-01	m6A.gene.clusterB
TCGA-41-3392-01	m6A.gene.clusterB
TCGA-06-0882-01	m6A.gene.clusterB
TCGA-16-0850-01	m6A.gene.clusterA
TCGA-08-0385-01	m6A.gene.clusterA
TCGA-26-5136-01	m6A.gene.clusterA
TCGA-28-5207-01	m6A.gene.clusterA
TCGA-06-5418-01	m6A.gene.clusterB
TCGA-76-4932-01	m6A.gene.clusterA
TCGA-12-5295-01	m6A.gene.clusterB
TCGA-76-4934-01	m6A.gene.clusterA
TCGA-28-5216-01	m6A.gene.clusterA
TCGA-76-4929-01	m6A.gene.clusterA
TCGA-12-5299-01	m6A.gene.clusterB
TCGA-26-5133-01	m6A.gene.clusterA
TCGA-26-5139-01	m6A.gene.clusterB
TCGA-76-4935-01	m6A.gene.clusterA
TCGA-06-5414-01	m6A.gene.clusterB
TCGA-06-5416-01	m6A.gene.clusterA
TCGA-28-5204-01	m6A.gene.clusterA
TCGA-28-5220-01	m6A.gene.clusterB
TCGA-76-4926-01	m6A.gene.clusterB
TCGA-26-5132-01	m6A.gene.clusterA
TCGA-76-4925-01	m6A.gene.clusterA
TCGA-28-5208-01	m6A.gene.clusterA
TCGA-32-5222-01	m6A.gene.clusterB
TCGA-06-5415-01	m6A.gene.clusterA
TCGA-28-5215-01	m6A.gene.clusterB
TCGA-28-5213-01	m6A.gene.clusterB
TCGA-28-5209-01	m6A.gene.clusterA
TCGA-76-4931-01	m6A.gene.clusterA
TCGA-28-5214-01	m6A.gene.clusterB
TCGA-26-5135-01	m6A.gene.clusterA
TCGA-28-5219-01	m6A.gene.clusterA
TCGA-76-4927-01	m6A.gene.clusterB
TCGA-06-5417-01	m6A.gene.clusterA
TCGA-28-5218-01	m6A.gene.clusterB
TCGA-76-4928-01	m6A.gene.clusterB
TCGA-12-5301-01	m6A.gene.clusterB
TCGA-26-5134-01	m6A.gene.clusterA
TCGA-32-4208-01	m6A.gene.clusterB
TCGA-32-1978-01	m6A.gene.clusterA
TCGA-32-2494-01	m6A.gene.clusterB
TCGA-41-2572-01	m6A.gene.clusterB
TCGA-26-1439-01	m6A.gene.clusterB
TCGA-32-1991-01	m6A.gene.clusterB
TCGA-32-4213-01	m6A.gene.clusterB
TCGA-32-4210-01	m6A.gene.clusterA
TCGA-32-1977-01	m6A.gene.clusterB
TCGA-32-2495-01	m6A.gene.clusterA
TCGA-19-1790-01	m6A.gene.clusterB
TCGA-41-3393-01	m6A.gene.clusterB
TCGA-32-4719-01	m6A.gene.clusterA
TCGA-32-1973-01	m6A.gene.clusterA
TCGA-19-4068-01	m6A.gene.clusterA
TCGA-41-4097-01	m6A.gene.clusterB
TCGA-32-2491-01	m6A.gene.clusterB
TCGA-19-2631-01	m6A.gene.clusterA
TCGA-32-1987-01	m6A.gene.clusterB
TCGA-32-4211-01	m6A.gene.clusterB
TCGA-06-0939-01	m6A.gene.clusterB
TCGA-41-3915-01	m6A.gene.clusterB
TCGA-14-4157-01	m6A.gene.clusterA
TCGA-06-5410-01	m6A.gene.clusterB
TCGA-81-5911-01	m6A.gene.clusterB
TCGA-19-5953-01	m6A.gene.clusterB
TCGA-76-6286-01	m6A.gene.clusterA
TCGA-06-6389-01	m6A.gene.clusterA
TCGA-41-6646-01	m6A.gene.clusterB
TCGA-87-5896-01	m6A.gene.clusterA
TCGA-06-5408-01	m6A.gene.clusterA
TCGA-76-6664-01	m6A.gene.clusterA
TCGA-15-1444-01	m6A.gene.clusterA
TCGA-76-6656-01	m6A.gene.clusterA
TCGA-19-5955-01	m6A.gene.clusterB
TCGA-06-5859-01	m6A.gene.clusterA
TCGA-76-6282-01	m6A.gene.clusterB
TCGA-06-6695-01	m6A.gene.clusterA
TCGA-06-1804-01	m6A.gene.clusterA
TCGA-28-6450-01	m6A.gene.clusterA
TCGA-06-6694-01	m6A.gene.clusterA
TCGA-41-5651-01	m6A.gene.clusterA
TCGA-06-6698-01	m6A.gene.clusterB
TCGA-74-6584-01	m6A.gene.clusterA
TCGA-74-6573-01	m6A.gene.clusterA
TCGA-06-6700-01	m6A.gene.clusterB
TCGA-32-1980-01	m6A.gene.clusterB
TCGA-76-6660-01	m6A.gene.clusterA
TCGA-76-6191-01	m6A.gene.clusterA
TCGA-06-5856-01	m6A.gene.clusterA
TCGA-26-1442-01	m6A.gene.clusterA
TCGA-26-6173-01	m6A.gene.clusterA
TCGA-19-5958-01	m6A.gene.clusterA
TCGA-19-5951-01	m6A.gene.clusterA
TCGA-76-6285-01	m6A.gene.clusterA
TCGA-32-1979-01	m6A.gene.clusterB
TCGA-14-0740-01	m6A.gene.clusterA
TCGA-19-5947-01	m6A.gene.clusterB
TCGA-14-1395-01	m6A.gene.clusterA
TCGA-19-5954-01	m6A.gene.clusterA
TCGA-28-5211-01	m6A.gene.clusterB
TCGA-76-6662-01	m6A.gene.clusterB
TCGA-19-5952-01	m6A.gene.clusterB
TCGA-76-6280-01	m6A.gene.clusterA
TCGA-06-5411-01	m6A.gene.clusterB
TCGA-76-6661-01	m6A.gene.clusterA
TCGA-06-0650-01	m6A.gene.clusterB
TCGA-81-5910-01	m6A.gene.clusterA
TCGA-74-6575-01	m6A.gene.clusterB
TCGA-26-6174-01	m6A.gene.clusterA
TCGA-06-6391-01	m6A.gene.clusterA
TCGA-06-6697-01	m6A.gene.clusterB
TCGA-06-6701-01	m6A.gene.clusterA
TCGA-06-6693-01	m6A.gene.clusterA
TCGA-06-5412-01	m6A.gene.clusterB
TCGA-19-5959-01	m6A.gene.clusterA
TCGA-74-6581-01	m6A.gene.clusterA
TCGA-74-6577-01	m6A.gene.clusterB
TCGA-14-0862-01	m6A.gene.clusterB
TCGA-14-1043-01	m6A.gene.clusterB
TCGA-76-6193-01	m6A.gene.clusterB
TCGA-06-6388-01	m6A.gene.clusterA
TCGA-14-0781-01	m6A.gene.clusterB
TCGA-06-6390-01	m6A.gene.clusterB
TCGA-76-6283-01	m6A.gene.clusterA
TCGA-76-6657-01	m6A.gene.clusterA
TCGA-06-5413-01	m6A.gene.clusterB
TCGA-14-1450-01	m6A.gene.clusterB
TCGA-74-6578-01	m6A.gene.clusterA
TCGA-19-5956-01	m6A.gene.clusterA
TCGA-06-6699-01	m6A.gene.clusterA
CGGA_11	m6A.gene.clusterA
CGGA_124	m6A.gene.clusterB
CGGA_126	m6A.gene.clusterA
CGGA_168	m6A.gene.clusterB
CGGA_172	m6A.gene.clusterB
CGGA_195	m6A.gene.clusterB
CGGA_203	m6A.gene.clusterA
CGGA_221	m6A.gene.clusterB
CGGA_225	m6A.gene.clusterA
CGGA_240	m6A.gene.clusterA
CGGA_287	m6A.gene.clusterB
CGGA_292	m6A.gene.clusterA
CGGA_370	m6A.gene.clusterB
CGGA_373	m6A.gene.clusterA
CGGA_375	m6A.gene.clusterB
CGGA_377	m6A.gene.clusterA
CGGA_380	m6A.gene.clusterA
CGGA_404	m6A.gene.clusterB
CGGA_419	m6A.gene.clusterB
CGGA_437	m6A.gene.clusterB
CGGA_439	m6A.gene.clusterA
CGGA_442	m6A.gene.clusterA
CGGA_444	m6A.gene.clusterB
CGGA_451	m6A.gene.clusterB
CGGA_454	m6A.gene.clusterA
CGGA_512	m6A.gene.clusterB
CGGA_527	m6A.gene.clusterA
CGGA_547	m6A.gene.clusterB
CGGA_549	m6A.gene.clusterA
CGGA_557	m6A.gene.clusterA
CGGA_570	m6A.gene.clusterA
CGGA_573	m6A.gene.clusterB
CGGA_575	m6A.gene.clusterB
CGGA_588	m6A.gene.clusterB
CGGA_593	m6A.gene.clusterA
CGGA_594	m6A.gene.clusterB
CGGA_597	m6A.gene.clusterA
CGGA_606	m6A.gene.clusterB
CGGA_609	m6A.gene.clusterA
CGGA_612	m6A.gene.clusterA
CGGA_640	m6A.gene.clusterB
CGGA_646	m6A.gene.clusterB
CGGA_649	m6A.gene.clusterA
CGGA_654	m6A.gene.clusterB
CGGA_664	m6A.gene.clusterA
CGGA_683	m6A.gene.clusterB
CGGA_684	m6A.gene.clusterB
CGGA_686	m6A.gene.clusterB
CGGA_693	m6A.gene.clusterB
CGGA_699	m6A.gene.clusterB
CGGA_709	m6A.gene.clusterA
CGGA_713	m6A.gene.clusterA
CGGA_714	m6A.gene.clusterA
CGGA_729	m6A.gene.clusterA
CGGA_741	m6A.gene.clusterB
CGGA_764	m6A.gene.clusterB
CGGA_775	m6A.gene.clusterB
CGGA_778	m6A.gene.clusterA
CGGA_907	m6A.gene.clusterB
CGGA_156	m6A.gene.clusterA
CGGA_178	m6A.gene.clusterA
CGGA_205	m6A.gene.clusterB
CGGA_210	m6A.gene.clusterA
CGGA_218	m6A.gene.clusterA
CGGA_255	m6A.gene.clusterB
CGGA_264	m6A.gene.clusterA
CGGA_308	m6A.gene.clusterB
CGGA_311	m6A.gene.clusterA
CGGA_324	m6A.gene.clusterB
CGGA_335	m6A.gene.clusterA
CGGA_345	m6A.gene.clusterA
CGGA_346	m6A.gene.clusterB
CGGA_366	m6A.gene.clusterB
CGGA_371	m6A.gene.clusterB
CGGA_401	m6A.gene.clusterA
CGGA_436	m6A.gene.clusterB
CGGA_464	m6A.gene.clusterA
CGGA_504	m6A.gene.clusterA
CGGA_628	m6A.gene.clusterB
CGGA_734	m6A.gene.clusterA
CGGA_D60	m6A.gene.clusterA
CGGA_104	m6A.gene.clusterA
CGGA_462	m6A.gene.clusterB
CGGA_798	m6A.gene.clusterB
GSM2198606	m6A.gene.clusterB
GSM2198607	m6A.gene.clusterA
GSM2198608	m6A.gene.clusterB
GSM2198609	m6A.gene.clusterB
GSM2198610	m6A.gene.clusterA
GSM2198611	m6A.gene.clusterB
GSM2198612	m6A.gene.clusterA
GSM2198613	m6A.gene.clusterA
GSM2198614	m6A.gene.clusterA
GSM2198615	m6A.gene.clusterB
GSM2198616	m6A.gene.clusterB
GSM2198617	m6A.gene.clusterA
GSM2198618	m6A.gene.clusterA
GSM2198619	m6A.gene.clusterA
GSM2198620	m6A.gene.clusterA
GSM2198621	m6A.gene.clusterA
GSM2198622	m6A.gene.clusterB
GSM2198623	m6A.gene.clusterB
GSM2198624	m6A.gene.clusterA
GSM2198625	m6A.gene.clusterB
GSM2198626	m6A.gene.clusterA
GSM2198627	m6A.gene.clusterB
GSM2198628	m6A.gene.clusterA
GSM2198629	m6A.gene.clusterA
GSM2198630	m6A.gene.clusterB
GSM2198631	m6A.gene.clusterA
GSM2198632	m6A.gene.clusterA
GSM2198633	m6A.gene.clusterB
GSM2198634	m6A.gene.clusterB
GSM2198635	m6A.gene.clusterB
GSM2198636	m6A.gene.clusterA
GSM2198637	m6A.gene.clusterA
GSM2198638	m6A.gene.clusterA
GSM2198639	m6A.gene.clusterA
GSM2198640	m6A.gene.clusterB
GSM2198641	m6A.gene.clusterB
GSM2198642	m6A.gene.clusterA
GSM2198643	m6A.gene.clusterB
GSM2198644	m6A.gene.clusterA
GSM2198645	m6A.gene.clusterA
GSM2198646	m6A.gene.clusterB
GSM2198647	m6A.gene.clusterA
GSM2198648	m6A.gene.clusterB
GSM2198649	m6A.gene.clusterB
GSM2198650	m6A.gene.clusterA
GSM2198651	m6A.gene.clusterB
GSM2198652	m6A.gene.clusterA
GSM2198653	m6A.gene.clusterB
GSM2198654	m6A.gene.clusterA
GSM2198655	m6A.gene.clusterB
GSM1912920	m6A.gene.clusterA
GSM1912921	m6A.gene.clusterA
GSM1912922	m6A.gene.clusterB
GSM1912923	m6A.gene.clusterB
GSM1912924	m6A.gene.clusterA
GSM1912925	m6A.gene.clusterB
GSM1912926	m6A.gene.clusterB
GSM1912927	m6A.gene.clusterA
GSM1912928	m6A.gene.clusterA
GSM1912929	m6A.gene.clusterA
GSM1912930	m6A.gene.clusterA
GSM1912931	m6A.gene.clusterB
GSM1912932	m6A.gene.clusterB
GSM1912933	m6A.gene.clusterA
GSM1912934	m6A.gene.clusterA
GSM1912935	m6A.gene.clusterA
GSM1912936	m6A.gene.clusterB
GSM1912937	m6A.gene.clusterA
GSM1912938	m6A.gene.clusterB
GSM1912939	m6A.gene.clusterA
GSM1912940	m6A.gene.clusterA
GSM1912941	m6A.gene.clusterB
GSM1912942	m6A.gene.clusterA
GSM1912943	m6A.gene.clusterB
GSM1912944	m6A.gene.clusterB
GSM1912945	m6A.gene.clusterB
GSM1912946	m6A.gene.clusterB
GSM1912947	m6A.gene.clusterB
GSM1912948	m6A.gene.clusterA
GSM1912949	m6A.gene.clusterA
GSM1912950	m6A.gene.clusterB
GSM1912951	m6A.gene.clusterA
GSM1912952	m6A.gene.clusterA
GSM1912953	m6A.gene.clusterA
GSM1912954	m6A.gene.clusterB
GSM1912955	m6A.gene.clusterB
GSM1912956	m6A.gene.clusterA
GSM1912957	m6A.gene.clusterB
GSM1912958	m6A.gene.clusterB
GSM1912959	m6A.gene.clusterB
GSM1912960	m6A.gene.clusterB
GSM1912961	m6A.gene.clusterA
GSM1912962	m6A.gene.clusterB
GSM1912963	m6A.gene.clusterB
GSM1912964	m6A.gene.clusterA
GSM1912965	m6A.gene.clusterB
GSM1912966	m6A.gene.clusterA
GSM1912967	m6A.gene.clusterB
GSM1912968	m6A.gene.clusterA
GSM1912969	m6A.gene.clusterB
GSM1912970	m6A.gene.clusterA
GSM1912971	m6A.gene.clusterA
GSM1912972	m6A.gene.clusterB
GSM1912973	m6A.gene.clusterB
GSM1912974	m6A.gene.clusterB
GSM1912975	m6A.gene.clusterA
GSM1912976	m6A.gene.clusterA
GSM1912977	m6A.gene.clusterA
GSM1912978	m6A.gene.clusterB
GSM1912979	m6A.gene.clusterA
GSM1061661	m6A.gene.clusterA
GSM1061662	m6A.gene.clusterB
GSM1061663	m6A.gene.clusterA
GSM1061664	m6A.gene.clusterA
GSM1061665	m6A.gene.clusterB
GSM1061666	m6A.gene.clusterB
GSM1061667	m6A.gene.clusterA
GSM1061668	m6A.gene.clusterB
GSM1061669	m6A.gene.clusterA
GSM1061670	m6A.gene.clusterA
GSM1061671	m6A.gene.clusterB
GSM1061672	m6A.gene.clusterB
GSM1061673	m6A.gene.clusterA
GSM1061674	m6A.gene.clusterB
GSM1061675	m6A.gene.clusterA
GSM1061676	m6A.gene.clusterB
GSM1061677	m6A.gene.clusterB
GSM1061678	m6A.gene.clusterB
GSM1061679	m6A.gene.clusterA
GSM1061680	m6A.gene.clusterB
GSM1061681	m6A.gene.clusterB
GSM1061682	m6A.gene.clusterB
GSM1061683	m6A.gene.clusterB
GSM1061684	m6A.gene.clusterA
GSM1061685	m6A.gene.clusterA
GSM1061686	m6A.gene.clusterA
GSM1061687	m6A.gene.clusterB
GSM1061688	m6A.gene.clusterB
GSM1061689	m6A.gene.clusterA
GSM1061690	m6A.gene.clusterB
GSM1061691	m6A.gene.clusterB
GSM1061692	m6A.gene.clusterA
GSM1061693	m6A.gene.clusterA
GSM1061694	m6A.gene.clusterA
GSM1061695	m6A.gene.clusterA
GSM1061696	m6A.gene.clusterA
GSM1061697	m6A.gene.clusterA
GSM1061698	m6A.gene.clusterA
GSM1061699	m6A.gene.clusterB
GSM1061700	m6A.gene.clusterA
GSM1061701	m6A.gene.clusterA
GSM1061702	m6A.gene.clusterB
GSM1061703	m6A.gene.clusterA
GSM1061704	m6A.gene.clusterA
GSM1061705	m6A.gene.clusterB
GSM1061706	m6A.gene.clusterA
GSM1061707	m6A.gene.clusterB
GSM1061708	m6A.gene.clusterB
GSM1061709	m6A.gene.clusterB
GSM1061710	m6A.gene.clusterB
