# Supplementary material for: Integrating machine learning and bioinformatics analysis to m6A regulator-mediated methylation modification models for predicting glioblastoma patients’ prognosis and immunotherapy response
Source: Aging (Albany NY). 2023 May 23;15(10):4051–70. doi: 10.18632/aging.204495 (PMC10257999; doi:10.18632/aging.204495)
Supplement: Supplementary Table 15 [file aging-15-204495-s018.xls]

## Sheet: SupplementaryTable17_gsva_m6Asc
Supplementary Table 15. GeneSignature_gsva_alldata.
	CD8 T effector	DNA damage repair	Pan-F-TBRS	Antigen processing machinery	Immune checkpoint	EMT1	FGFR3-related genees	Angiogenesis	Fanconi anemia	Cell cycle	DNA replication	Nucleotide excision repair	Homologous recombination	Mismatch repair	EMT2	EMT3	WNT target	Cell cycle regulators	m6Ascore
CD8 T effector	1	-0.156153	0.36717	0.318506	0.372554	0.149571	-0.232279	0.274112	-0.165204	-0.135393	-0.0673011	-0.119116	-0.120723	-0.100731	0.364085	-0.142203	0.00784674	0.0250908	0.452782
DNA damage repair	-0.156153	1	-0.241407	-0.156593	-0.338266	-0.250589	-0.207542	-0.219634	0.874037	0.688672	0.820047	0.807103	0.780277	0.8202	-0.244231	-0.11856	0.090332	0.0442977	-0.0450688
Pan-F-TBRS	0.36717	-0.241407	1	0.380479	0.36416	0.470664	-0.156975	0.203674	-0.218848	-0.0925484	-0.139933	-0.220058	-0.109586	-0.123672	0.707054	-0.0820416	0.149337	0.190969	0.661751
Antigen processing machinery	0.318506	-0.156593	0.380479	1	0.444516	0.195664	-0.0777114	0.137142	-0.149853	-0.0411978	-0.0599173	-0.0414379	-0.017425	-0.0490194	0.402582	-0.0843223	-0.0274983	0.121735	0.429854
Immune checkpoint	0.372554	-0.338266	0.36416	0.444516	1	0.33063	-0.101171	0.0703511	-0.330343	-0.333527	-0.239058	-0.211019	-0.226642	-0.231986	0.471557	-0.0635971	-0.129915	0.0967814	0.468515
EMT1	0.149571	-0.250589	0.470664	0.195664	0.33063	1	-0.184582	-0.06519	-0.180148	-0.054725	-0.156329	-0.24094	-0.139998	-0.184623	0.411871	0.228198	0.150192	0.293847	0.314713
FGFR3-related genees	-0.232279	-0.207542	-0.156975	-0.0777114	-0.101171	-0.184582	1	0.0638606	-0.0984334	-0.230688	-0.253616	-0.232228	-0.134392	-0.181462	-0.170342	0.197681	-0.0702352	-0.126295	-0.192951
Angiogenesis	0.274112	-0.219634	0.203674	0.137142	0.0703511	-0.06519	0.0638606	1	-0.202337	-0.221811	-0.192022	-0.245008	-0.165251	-0.203394	0.0888903	-0.0998835	-0.0968237	-0.0620301	0.0564813
Fanconi anemia	-0.165204	0.874037	-0.218848	-0.149853	-0.330343	-0.180148	-0.0984334	-0.202337	1	0.656145	0.746927	0.6835	0.764181	0.756929	-0.235473	0.0400155	0.158607	0.09671	-0.0599645
Cell cycle	-0.135393	0.688672	-0.0925484	-0.0411978	-0.333527	-0.054725	-0.230688	-0.221811	0.656145	1	0.770165	0.586115	0.576354	0.69933	-0.135049	0.0969294	0.366123	0.299254	-0.0326061
DNA replication	-0.0673011	0.820047	-0.139933	-0.0599173	-0.239058	-0.156329	-0.253616	-0.192022	0.746927	0.770165	1	0.793885	0.777575	0.907953	-0.131935	-0.117262	0.115893	0.0861372	0.0805356
Nucleotide excision repair	-0.119116	0.807103	-0.220058	-0.0414379	-0.211019	-0.24094	-0.232228	-0.245008	0.6835	0.586115	0.793885	1	0.731603	0.795492	-0.189721	-0.20073	0.0240139	-0.0046041	0.0578101
Homologous recombination	-0.120723	0.780277	-0.109586	-0.017425	-0.226642	-0.139998	-0.134392	-0.165251	0.764181	0.576354	0.777575	0.731603	1	0.794656	-0.158928	-0.136588	0.0351324	0.0395142	0.0921625
Mismatch repair	-0.100731	0.8202	-0.123672	-0.0490194	-0.231986	-0.184623	-0.181462	-0.203394	0.756929	0.69933	0.907953	0.795492	0.794656	1	-0.112157	-0.0870721	0.0988153	0.019344	0.13546
EMT2	0.364085	-0.244231	0.707054	0.402582	0.471557	0.411871	-0.170342	0.0888903	-0.235473	-0.135049	-0.131935	-0.189721	-0.158928	-0.112157	1	-0.111438	0.0960771	0.15423	0.586538
EMT3	-0.142203	-0.11856	-0.0820416	-0.0843223	-0.0635971	0.228198	0.197681	-0.0998835	0.0400155	0.0969294	-0.117262	-0.20073	-0.136588	-0.0870721	-0.111438	1	0.259769	0.150189	-0.212076
WNT target	0.00784674	0.090332	0.149337	-0.0274983	-0.129915	0.150192	-0.0702352	-0.0968237	0.158607	0.366123	0.115893	0.0240139	0.0351324	0.0988153	0.0960771	0.259769	1	0.289954	-0.0513048
Cell cycle regulators	0.0250908	0.0442977	0.190969	0.121735	0.0967814	0.293847	-0.126295	-0.0620301	0.09671	0.299254	0.0861372	-0.0046041	0.0395142	0.019344	0.15423	0.150189	0.289954	1	0.079456
m6Ascore	0.452782	-0.0450688	0.661751	0.429854	0.468515	0.314713	-0.192951	0.0564813	-0.0599645	-0.0326061	0.0805356	0.0578101	0.0921625	0.13546	0.586538	-0.212076	-0.0513048	0.079456	1
